# Supplementary material for: Insights Into the Mechanisms Implicated in Pinus pinaster Resistance to Pinewood Nematode
Source: Front Plant Sci. 2021 Jun 10;12:690857. doi: 10.3389/fpls.2021.690857 (PMC8222992; doi:10.3389/fpls.2021.690857)
Supplement: Data Sheet 1 — Fasta file with de novo assembled Pinus pinaster transcripts. [file Data_Sheet_1.XLSX]

## Sheet: Folha1
>DN69542_c0_g1_i1	len=383 path=[0:0-382]
GCAGGAAGTACTTCTGGCTTCTAAACCATAACTTACAGTAGGTCTGTAGAATAAAAAAGAACTGAAGTGTGGGTACACTGCCTGCTTCTGAATGAATCAACTGGGTCCCCAACCAATATATGAAAATTGCAAATGGCATGCAGTTTTAAACTGCAAACTTGAGCGAAGTAGAGAGCATACCTTAATCATGGGTATGATGCAGCATAGAGAATCAATTAGTTAAAAAGGTGAACGTGAAATTCAAACCCAAGAGCATCTTCTGAACCTTCAATTCAACTGGAACCCAAATTCAAATCCACCTAACACCCAAATGGATTTTCTCGTTGTTGAATTGAATTCCTTACTTCTTTTTTTAACTTTAATCCTTCTTGAATTGTGATTTG
>DN69554_c0_g1_i1	len=291 path=[0:0-290]
AAATGATCAAAGAAGTACATGACAACAACACTGCATATACCTCAACTCTGATGTTGGCTGAAGAATGACATACTCAGTTGTTGGATTTCAATGCGCCATCGAAATCGTGGCGTCAAATGTCATCAAATCAACTGTACACACTCTGAAATCTGACACTGTTGTTCCAATCTGGAAAATGGCCTAGAAATATAAGGCTTAGATGCAAAAACTAACTGCACCACTGAATTTGTGTCGCCGAGAGGTGTAAAATCAACTACCCATTTTCTGAATTCTGACACCGGCAAAATCTGG
>DN69507_c0_g1_i1	len=273 path=[0:0-272]
AACTTCCAGGTTTTATAAATGGTGAAAAATGAGACAGAAATAGGTTGAGATTGTATTGGTGTATTAGGAATGGGTGACCTGGTATATTGCAACAAAGTAGTTGTACAAGGTGTTTGCATAGTGTGTGTGCATGTAAGCCTACAGTTGGGAAGCATTATACAAATTTTCACTTCCCTCTAAATGAATAAAGAGCAAATCATGTCAAATTATCTTTCATAACTAACATACTCTTATTATAACAATAGTGAATGTAAAATTTATAAGAAGAGTAAG
>DN69589_c0_g1_i1	len=258 path=[0:0-257]
GAAAGGTTTCTGGATTATTATTTTTTGTTGACCTTTTTAGTCTGCTTTTGTGGTCCGAAGAACTACTAATTTGGAAAAAATGGAAATAATCAGGTAGTCTGGATAGTCTGGATAGAGTCATGCACGGAATACTAGAAAAAACTTACCTTGAGGCAGTATCGAGTCACATTGACTTGGTTGTTCTATACCAGACGGCACAACAAATTTCAAGTGTACGAGGAACTTCTTCAATCTGTCCGTCCATTTGTTGATAATAGC
>DN69582_c0_g1_i1	len=425 path=[0:0-424]
GTCTGCTTCGTACCTATGTGCTGTCCCTCGTGGCTCTCATGGTTGATCATACCTTGGTGCGATGCGCTGGTTGGTAATGCTGGCCGTGGTCGTGCATTCTCATTGCACTGACCTCTGCATATCATTCTTCATTACGTGGCTTATACATGGCTGTATGGTTATTACCATATGGTTGTGTAATAAACGCCAAACATTTTGTTATGATATCCCATGTTAATGGTTATGGTTACGTTGTATCATTTGATTGTTACCATATGCCGTGACCATCATTCCTTATCATCACGCCTTACCATTGTGCTGTATGCTTACGGCCTTCACGTATTTGCTCATCATAACCCACGGCCTTATGCCATATTACATGCTTTTGTCTGTTGATTAATGCGCATAGGTTATATGCCT…
>DN69586_c0_g1_i1	len=275 path=[0:0-274]
TCATGCAACAAAGGTGAATATTCTTCCCAAACGATCCTCAAAATCCACTGTTTATATCCACGGAAATGGTGATAACTACAAATACTAGGAGAAATCCTCGGGCAATCATGGCATCTAATGTTGTTTTTGCTACAGAAACACGGGATAATTCAATGTATCTGTTGAATGAGAATGCACAATTGAGGAAAGCGTTGGCTGCAATAAAGCAACAAGTGAAACACCTCGCTGCTAAAAACCAACAACTATCTTCCCACAGCTTCAACATAGCAAAATGG
>DN69576_c0_g1_i1	len=287 path=[0:0-286]
CCACCGAATATTTTATTGCCTATTTAAACGCAAAGGAAAACAAGAATAATTCTACATTCATATTGCTCACTTCAACGCAACGATATAAGAGTTATAATTCTGAAGTTCGAGAGAAAAATGTCAGAATGGGGTAAGTGAAATTGGCCCCGCATCCATCACAATACCAATTTTCATCAATACTCATTGAAAATTTGCTAACCCTTTGAAAATTTGCTAATCCTGTGATGGGTGTGGAATTCATGATAAACAAACCTATCACAATAAAACCCTTTGAAAATTTGCTAATC
>DN69532_c0_g1_i1	len=320 path=[0:0-319]
ATTTGTTAAACTCCACTTCATGTTGGAGGGTGGTTGACACTTTCTACGATGTGGTTAGTGAGCCTTACCCATTTGGAAGCGAGTACAATCATCCACATTCAAATGGGAAACCTGGTGTGGGGCAATAGAAGTGCCTTGTTTTCCCAGCTACAACAATCCAATCCCTCTTTTATCAAACTTGCTTTTTTTGATGAGTGGTTGCTATTGTGGGTATCTATTCTCTTAAAGTCACCCAAGACTTGAATACCCAGTACTTGAACTTGAAACAATCTGAATAGAAGATTGCACTAGCACATGTACTGAGTCCACTAGTTTTTGAA
>DN69515_c0_g1_i1	len=622 path=[0:0-621]
AGTAGACATAGGATACACATCCAATCCATTGTTGTCTTTCTTCCCAGAGTTGAGCTGAAGCTTAGACTGAATGAAGACAAGAGCTTCTGCCATCTTTGATCCCAGCTAGAAAATGGGTGTCTGTAGTCTAGAAAAATTCCCAAGGTAAAAGAGGAAATTAGGCATCAAAATCACGAAGTTTGCAAAATTAATTGACTATGATAGTTCCCAACTTTGGAACAAGCTGCACGCTAACAAACAGCCCAGTAATTCCAAGTGATGTTAATTGTCACTGTGAACACTAATTAGTTGGCCGATGGTCAATGATCCATTTTATTAAATTGCCTGTTCTAGTCTGTTCTGAAACTATTAGAAATTCCAGAAGCCGAATCATTTTCCCTTTAATCATGATTTATGTGG…
>DN69544_c0_g1_i1	len=302 path=[0:0-301]
GGCAAGGCAGCCAATACAATGTAAAATTAGGCCGAGAAAGTGGCCAGTACAATGTAAAAAGCAGGCCGAGAGAGGCCTTCGGTCCATGAGAGGCTATAGTATGAAATTTTGTTTGCTTTCCAATCTGAATATTTGATGTATTCTCAAATCTGTGGGTATTTATATTACACAAGCCCTGTTCAAATATCGTATTTGCCATGTCTGTTATTGGCAATTAAGGGCAGCTGCAGGCGGCAGCATAGACAAGAGTATCCAGGCTAGGTGACAGCCAAGTAACCAACGGAGATGGACTGACGAAGGGT
>DN69547_c0_g1_i1	len=207 path=[0:0-206]
GACTCTAATAAATTATCTTATCTTACCAAACAGTTCTATTTAATTACTTTTAGGGTCATTTGTTGAACTTTAATAAATAGTTCTTATCTTACATAATAAACACCCATTCCCTTGTTCTGGAAACTCTTGCAAGTTGCAACATAGCTTTAAAGGTTGTTAGTTATTGTGTCAATACAGAATATTCCTCCAGCAATTTAAATTCATGTG
>DN69562_c0_g1_i1	len=265 path=[0:0-264]
GTATGTGTGCGCATGGACAGACTGGTTCAGGTATTCGAGCACATTGGCTTATAAAGTGAGACCATATACAGGCGTTTATGCATGGTTTTCATTAAGGACAAATGTATTAGCACACAAGTCACATTGGTTCAGGTATTCAAGCCCCTTTGGTTTCAAAATCATCCACATACACATGTTTATGAAAGGTTTTCATGAAGGACAAATGTGGTACCATTCATTGGTCACCATCAAGTCGCATCAAAACAGCATAGTAAGAGATATTATA
>DN69590_c0_g1_i1	len=226 path=[0:0-225]
AATGCTAATATCCATTTCCAAGTGTGTAGAAGACTCTTATGAATTTTTGTGAAGGATTATTTGGGCCTGGGGGAAATCTCAAATGGATCAACTCATTCTCAAATTCTCATTCTCATTGGCTACAAGGACTTCATCCAATGAAAAGCAAAGAGGGGAGTTTCCTTTTACTCTACTTTACTAGAATCATATAAAATTCAAATTTAATATTATCTTTGGACAAAATTCA
>DN69598_c0_g1_i1	len=347 path=[0:0-346]
ATACTCCCCAACAAGTGCGCCCTTGTAGAAGATGCCAAATATGCAACATCATCAAGAAGTGCACCACCATAACACTTATCTGAAGGCAAGAAAACGCCCAATCTAAGCTCTTCAAATGTAAGTGGAAAATAAACAAAAAGGCTAGGAGAGCACTAGTCCTTCAGATCCCGTGAAGCACTCTCTTGGCTAGGTGAAAAGAAATTTAGAGCGACTATAAGCTAATACCCAATTATTTTTTTCTGATGATACATTCACACATACGGGGCGTACGTTGCTATTATGTGTACATACCTTTTCTCTTTCATGCTTACATATGTCTACTTTGCAATATGACATGCCAGATCTGG
>DN69566_c0_g1_i1	len=318 path=[0:0-317]
TGTCATTTGTAAAGAAACGATATTGAGAAGAAAACTACCCACCCAGACCCTGAACATAAAAGCTTGAAATCTCATACGGGAGGACAATTGTTCATAAGAATCCGAACACCAATAGATTGGTGACAGTATGCTTTCACTTTTCTCGCGGCTCACCGCCTCTCTCAAGCATTTTGAGCACTAGGGGGCTGTGAGAAGGGCCGTTCAACTCACCGCTTTTCTGAAGCATTTTGAGCGTTAGGGTGCTGTCTAAAGCGAAAAGCGCCGTTCCAGTGAGAATTAAAATGTATGACGGGAATTTTAAGGAAAAAGTGTTAAAAA
>DN69555_c0_g1_i1	len=378 path=[0:0-377]
GTTCAAACAAAGTTATTTGGCATTAATAAACTGAATTTAAGAAGTAATCTGAGCTGACTTTGTTCCTTTAAATCACTGTTATCTGGTACTGTTATATGGTGCCTTTTTCTGTTGCAGTCTCCCCTTTTTTCCCGAAGTATAAGATGATTTCACACGAGCTTCAACAGAGAAAAAACAAGCATGTTTTGGCAAAAAACTTGATGTGTCCGGATCAAGTTACAGTTTTCTATTGTATTTTAAACTATTGTACTTCTATTTACTTTAATGGTTGATTGAAACCTAGCAATTAAACCATCTTAACAATTGCAGGTTAAGCTTAGTGTTCTTACCTATACAACTATACATAAAAGTTTTCATGCTGCTGTTGATGTTCATAAG
>DN69596_c0_g1_i1	len=589 path=[0:0-588]
AGATTCTTTGATATTTATAATATGTCGATGCTTTTTGTAAGCTTATTTTGTTAGATATAGTGGTAGTAAATTCCACATTGGGACCAAATGAATCTAGCCAAATGAGCCGCTGTAATGTATGATTTGTAAAGAGTAACTAAAGGATAATAAGGAGAAAAATTAAAATCAATTTCTTGCATATTTAGCCACATGGAAGGGCCCATTTGGTGTCCAAAAGGATCAAATCGGTGGAAATAAAATGCAGACCAGTAGAAGCAAATTACAAAGCCTTTCCTGATTCCTCATTGATTATGGGATTTGTGTTTAAAATGTAGGAACCATATCAACTTATAGTCTAGCAGCAAGTTGTGACGTGATTGAACTTGTATTAATGCTAAGGCCTGGATTCAAACCCCCCAA…
>DN69543_c0_g1_i1	len=241 path=[0:0-240]
GCTCTATTCTTCAGTACTAGCCACACGAAAATGTTTGTCTTCTTTGGAAATTTGACTTGCCAAATTTTGGACCACCACCAGCATCTCTCCTGTGTCACTGGTTCCTGCATAGGTCTGTACCCTAGTCCGGCTATATAATAGTCAGCTACCTTAACTTTAACCCAAACCACTGCATCATAATCTCCACACAGCTTGACATGAGTCCGTCTGTATAATACTCAGCTACCTTAACTTTAACCCA
>DN69509_c0_g1_i1	len=321 path=[0:0-320]
GCCCTATATAACGGTTCCTTTATATCGGAACCCAATCACTCCGCTTGAACCTCCTATCGGGACATTATAACCCTTCATAACATTCACTATCCCTTTGTTAAAGCCTTCCTCAATCTTCCTTATCGGTACTGTTAAAACCCTTCTAAACCTTAGTTTAAGCCATTAATTAGTCCATCGGCCACATATATATAACAAGCCCTCTTAACCTTTGGTTAATACATAATTAACGCATAAACCTTCTCCTTCAGCGTTATTTTCCCTATAAACCACTTACAAAGGAAAACACACACAAAACCTTACCTTCCGCCTTTTGTACGACTT
>DN69506_c0_g1_i1	len=297 path=[0:0-296]
TAATCAACAACTAGAGACAAGACTTTCCCTAACACTAGTCTCTCGTTGGTGATTTCACATTCAAAAGTATGGGGCAATATCCTCTTTATATTTAATTGTACTAAGTGGAACAGAGTAGAGAGCATTGCATGTACTATTGTTGGTTCTACCAAGTGTTGTTCCAATGTTTCTTGAGTAGGCTTCGTGTCCCTTTGAGTGATGGCCAATTTGTGTGCTTGTATCATTTCTTCTATTTCCTTCTGTAACTTATGTTTTAGGCTTATTTCTCAGCGTGCTCCAATGGGAATTATCTTGTAG
>DN69573_c0_g1_i1	len=409 path=[0:0-408]
TCTCATTTTCTTTGAAGAATGAAGGGGTCTTCAATTAACAAGGAGGGGATCAATACAAATCCCAAGTGATCTTCAGCTGGCTACAATATCTTGATGTGTCCTGGTGCTATTTCCTTTTCTGTCAGTTTATGGATTGTTTAAAATGACTAGAACTGGTTTTGCTTTGTCATCAGCGGATTGTAATGTAGATTCTCTGATTTTGTATCTGCTACTATGCAATCGTGTCTTTGGGATTCTCAGCTTAATGCTGGTTTTATTATGCCCACTTTTGCTCCCTGTCAGCCAGTGTTGTGCTGTGTGTTTTTTGATGGAAATACTGTCATTATATATGCCGTAATGTGGGCAATTTTTTTGTAACTGTACTCCTTTTCTAATGAACAGGACGATTTTTCTTCTTTG…
>DN69594_c0_g1_i1	len=294 path=[0:0-293]
GCCATATGATGCATATGCTGGATACTAAGATATAGATCGAACCATCGAGACAATGAATGCTACATGGATAAGATTTGAATCATGGAAAGAATGCGTCCAGAATGTGATGCGATGCCCAGAAATGTGAGGCATAGAGCAAACCATACTTCATGTATTGTGAGACAAAGATCGAGCCAATACTTCACCATAGAGAACGAACCAATACTCACTGTAATGTGAGACAGAGATCAACCAAATACAAAAGAGCAAGCCTTAAACAATGAGACAATGGAGAAGAGCAAGCCTCAAAACCGT
>DN69588_c0_g1_i1	len=223 path=[0:0-222]
GTAAGAACGAGTTGCAAGCGGGAGAGATAGTAAAGCAGGGAACAAGAGTTTACCTGTGGAGGCAGAGTGAACACCAGAACCAATACCAGAGCAGACCTTACAACCAATTGATGCGTAAAGACCAGGCGCAATGTGCCTTTGCAGGAACCAGAAGCCAAAGCAATCCATGAACCCGTGAGCGTAAAACCACCAGAGGAAACCCTAGTTGCAGAGCGACGGAGCA
>DN69523_c0_g1_i1	len=224 path=[0:0-223]
GTAATCAACTGAGCGGTCTTTGAAGGTTCATGAGTAGGGCACACTGTCTAAAAATAACTGCCTCCCAAATGTATAAGGCTGGGCATCTCTGGCTTGGTTACCAGAAGGATGTAAAAAGGGACTTACCAAGGTCTGTGTATAAGCAGTGAAATCTCTCCCAGATCTGGTAGAAGACAGAGCACCTAAAAGTCAACTGCTCTTCTGTCTGTGCCTCTCGGAAGGAG
>DN69512_c0_g1_i1	len=388 path=[0:0-387]
GCCTCACGACGAAACCGGACAATGGCACACAAAACCAATCACCATCTGCCTGAAGTCTGCCCCGATCTGTGGCAGATCCACCAGGTGATTTACCCCCCGAAATGTGTCTCGGAAATTTCGAAACGTGAATCGGGTCGTACGGTTCGCATAGGCAAGGATTGTTTTTTCCAGCCCGATCCACGTTTCGGAATTCCAGGACGCATTTTGAGGGGCGGATCACCTGCGGATCCATACGGGTCGTGTTTCCAAGTTTTTATCCGAGGGCCAGGGGGTGTTTTGTGCAACACTAGTTGACCCTGCTCTGGGAGCACCAGGGTCTTCTGGGCAGCGGAGAGTCCCTTACAACATGCCCTTATTGATCATAATTGTAACAGTGGATCGAGCCTCT
>DN69559_c0_g1_i1	len=303 path=[0:0-302]
AGGTGACCCAATTCAGGAGGAATGCTTCCGTTAAGCATATTATTCTGAAGCCTCAGGACAGCCAACTTCTCTAATGAAGTTAAAGGCTCTAATGGTATGCTGCCATACATCTGGTTCTTACTGAGATCCAGGGCTGTCAAATTCCTCAGTCTAAAGATCTCAGAAGAAATTTGGCCAGTGAAATTATTTGCAGAGAGGTTAAGATGGATGAGATACCTGAGTTGGCCAAGCTCTCCACCCAGAACGCCTGTAAGGTTGGCCTCTGCTAGATAAAGTTTTTCAATTCTTGAAGTTGGTCCATGG
>DN69514_c0_g1_i1	len=276 path=[0:0-275]
GTAGATTAGATTGGGAATTCAATCTGGGTTCTTTGAATATAATTTTATTGGAACTACTTTTAAAAATATTTTAGATAGTATTATAAATCAATGAGCTAAAATTTAAGATTGTAGATGTACAATCTCAAAAGCTTAGATACCGTTCATATGTAGATTCACTGCAGTTTCAATATTAAAAGGTGCCAACACTGCTTCACTGAGAATTCAACACTTCAATATGAGCCATCGTACACTAAGCATTGACAGGAAATGAACATACAAATTACCTGCAAAGAT
>DN69519_c0_g1_i1	len=371 path=[0:0-370]
TTGCTGGTAAACGCTAAGATTGTTTTCATAAAGTTATTATGAGTTATCTATAAACTTTGAAATATCCACGAAAAATATCCATCCCAAACCTAAAAAAATTCATTTCATGTCTGTTCAAGGGTTCAGCTTTTGAGGTTACAATAACATGGCCCTGCTGTACATAATATTGTCTATTATTTACATGCTTGCAATTATGAAGAAGTGTAATGTAATATGAAAAATATAATCTAATATTGGATAGAGTAAATATTTGGTTTTGTTTGGTAATGTGATTTTGAAGATGATTGATACGTTTAATTTTTGATTTTGCACACTTTATTTGTGATTTGTAAGCATGAACTAGGGGCATCTATGTTTTCAAAATATTTCAG
>DN69516_c0_g1_i1	len=306 path=[0:0-305]
TTATTTTTCCTACTTGCAAGGTTTGTTCATTGTTTTCTAGCGAGATCCAATTCATACATGTTCAACTGTCATTTCAAATCCTCCATATGAATCCATTGAATGTGAACCTACACCAACACCATAACTTCCAAGATTGGTCTGTTCTACAAGAAAAGGAGCTGAAAATCTTACCAATGATCATACAAATCAACGTTGTACTTGTTCGTAGTTCCAACAAGCCTCATGTCTTTTAGGTCAACTTTCAAGACTCGTGATCTAGATACATTTTTAGAAGCATCAGGATTTCCAAATTGGAATACGATGATG
>DN69517_c0_g1_i1	len=259 path=[0:0-258]
GGCACATTAAAAGGATGTTCATCTCCATGTTTAAACATTAGGCAAGCAGCTGTTCCTTGCCTCTTTTTATGTTATGTCGATGGACAGTAATGTAGACTCGTTATGAGTGGTTTGGCCAAAGGCAGCCCACTTTTTATAGTTTTGGACTTGCTTGCGGAGTCTGCAGTTGCGGCCCTCCTTTTTTGTATTAAAGCCTTGTATATATTACTCTTATTAAAAGTTTATAATGTGTAAAGAAAAATTCATATAACTAATCACA
>DN28056_c0_g1_i1	len=314 path=[0:0-313]
GAGGAGATGCTCGCATAGGGGAATGGTTCTGCTAACACTCAACAGATGGAGTCCATTGTCCAAGTGGTTTATCAACTGCTCTTTGGCAATGAGCACCACAGTGACTCACTTCTCTGATTTCAATCACGGGGCTATGCCCCAAGGTCCAAATGGGGATGTTGCTCAGTCTGGAAGGTTGAATCCATTGTCCAAGTGATCTTCCATCTGCCTCTTCATAGCAAGCACCACAGGGATCTGCAGTCCACTGTCCAAGTAGTTAACAGCTCTCCAACAAGCACCACGGCGACTCAATTGCTATGTCCAAGTGGTTAACA
>DN28014_c0_g1_i1	len=690 path=[0:0-689]
TGATCTAGTTGGTGTTTCGCTCAATGTTTGATCTAGTTGGTGTTTCGCTCAATGTTTGATCTAGTTGGTGTTTCGCTCACTTTAGATTACTCTATCAATGTCATTGTTGCTAATTTGTATCCACCTTATTAATGGTTGTTTAATTGGGTGATGGTGTATTGTATTTTTTTTTTTCAATTCTGTATTTTTTTTTCAATTCACTGCTTGGAGTTTGAGTGGCCTTATGTACTTGATGTCACGCAACGTCATCTTCTGGTTTTTTCCAAGATCTTGGTAATTTTGATTTTTTTTCCTTTTTAAGAATTTTTCAGCTAGTTTTTTTTTCCAAGATCTCGGTAATTTTGATTTTTTCTTCATCTTGGTTATTTTGATTTTTTCCTTTCTGAGAATTTTTCAGCT…
>DN28072_c0_g1_i1	len=377 path=[0:0-376]
GTCACTTATTTCTAGGATCTCTTCAGGTGGATCTGCCTGATATAAATGTTGGGGTCAACTATTAGTGAACCACATGGGAAAAAAATAAACTTTATCCAGTGTTGATGATCCATTCACATTTAGTTTTGTATTCACTTCTGGGTTTCCTTTAGGTATCTGCTTAGTATAAACATTGGAGTCACTTATTTCTAGGATCTCTTCAGGTGGATCTGCCTGATATAAATATTGGGATCAACTATTAGTGAACCACATAGGAAAAAAATAAACTTCATCCAGTGTTGATGATCCATTCACATTTAGTTTTGTATTCACTTCTGGGTTCCCTCCAGGTATCTGCTTAATATAAATATTGGGGTCACTTATTTCTAGGATCTCTT
>DN28037_c0_g1_i1	len=1052 path=[0:0-1051]
TACATATGGCCATTAAAGAATTTGTTATTTTCAACGCAACCAAAAAAAACCTCAAATTTGCTTAAACTGTAAATATACTCAAATTAGTCAATTGTGAGCTGCGTCAACATGGAAACAAAAAGGACTGTGTATATAGGATATCCATATTGCAAAACATATACATCAAGTTCAGGAAAATAGAAAAAACACCAAAATTAATAAGCAGGAGTAACAAATTCCAGAGACGAACAGGACTTCTCTTCCTCCATAGTTAAATAACTGCAATGGTAGACTTATACTGGCCCATACATATGGCCATTAAAGAATTTGTTATTTTCAACGCAACCAAAAAAAACCTCAAATTTGCTTAAACTGTAAATATACTCAAATTAGTCAATTGTGAGCTGCGTCAACATGGAA…
>DN28087_c0_g1_i1	len=372 path=[0:0-371]
CAAACGAATTCACAGGTTAATGTATCGAAAAAATGAAAATTTCTGTGTCATACTGGTAAAGAGAGGTAAAGGAAGACGAAATCCAAGGCTACAAGATTAGGTTTATCTTAATCCAAAGAGCTACATAGTGTCCAGATCTAACGAACATTGAGGGTACTTAAAAGAAATATAAACGCATCTACTACTGGCTGTCCTCAGTGCAAATTATTTTACACTGATGCAAACGAATTCACAGGTTAATGTATCGAAAAAATGAAAATTTCTGTGTCATACTGGTAAAGAGAGGTAAAGGAAGACGAAATCCAAGGCTACAAGATTAGGTTTATCTTAATCCAAAGAGCTACATAGTGTCCAGATCTAACGAACATTGAG
>DN28053_c0_g1_i1	len=218 path=[0:0-217]
TCGCAGATTACTCACCACAAAGATGACACATGGACATTCCTCCAGAGTGTCACCCTATAAGACACGTGAAACCCACCAAGCATGAGATGCACCCACAGAACCTGAAACAGGGGTGCTTATCTCTGAACTGGAACGGTGTTTTTCTTCAGACTTTTGACTACGTCAAAGCCAGCATGCTCTCCAATTTTTGGTTTGCGTTCCACTTGAAATCAAACTGA
>DN28007_c0_g1_i1	len=235 path=[0:0-234]
GGGATGGAGAAAGACACAATTGTGAAGCAAGGGAGCAAGGCAATGTGAATTACCCAATGCGCAATATTCAACAAGTGTACGCTTCAAACCAGAGAAGCATCAATGAAAGGGTTTCAGCGAAAGTTGGAGAAAGGATTTCCAGGGGAGATTTCCACAGAGACTTCCAAAGTCAAAGAGAGGGTTGAATTCATTTGTATGAAGGTCGTACCAATTGGTATGAATTCTCCAATGCACA
>DN28004_c0_g1_i1	len=205 path=[0:0-204]
AGTTAAATAAATAATTTTTCCATCTAATATTAAAATGACTCTAGTGACTCCAATAAAAATTCAACTTAATTTGAAAAAAAACATTTTTACATACCTATCCTATTCCCTAACAAATTCATTACAACAGATTCCAAATCTATGAGCACGTGACGTGCATGACATGATGGAGGGGGCGGATGGCTTTCGCTCCCCCGTGCCAGGATCG
>DN28098_c0_g1_i1	len=370 path=[0:0-369]
GTCCAGAATCTGCAGATGGTTTGATTGCTTTTGTGTGAGATGGAGACATTTAAGCAGCTTACTTACCCTTCGATTCTTCCTAGCACAGTTATTGTAATTGATACATGTAATAGATGACCATAGATTTTGCTGACTCGCTTTAATCTACCTGCCCTTCGATATTTCATTTTCATTGCCATTGGAAATCCCAGAAATCTAAAATACAGAACAAATTTCAGCATTTGACTTTCCTTGTGGTGTGAAGCAGTCAGCAAATTCCTCATGGTTGCAGCAAGGGCTTAGCAATAACTATTGACTTGCAGCAATGGAAAAGGATATCCTTTGCACCAATGTCTCTCTGATAAGAAAATACTGTTGAAAACTCTTTATT
>DN28058_c0_g1_i1	len=528 path=[0:0-527]
GGTGCATGTAAACGATCCAGGCACGTCTCCCAGATCTCCTTGTTTCTTAGCAGGAAAATATCTAAATGGCATAGAAGAGTCCCACACATCCTAGGGGACATCCCCCAAGGAAGGGAGTCTTCTCCTACAGTCCCCAAGTCCTCATGGACGTGGAAATATGGGGGGCACATCCCCACAGGTGGGGATGGGTTACTGTGCAACACTGTTGGTAGGCCATCAACTTGCATACAGTGCAGCAACATGTTCTCAGGAAGTGTAACAAATATTTAAAAGGATTCCAAAAGGGATATTAGAGGAATACAAATATTTAGCATATACACATGGCGTGTCAAGGATGCCTTGAAAAAAATGTACCAGACCCATAACCAAACAGCAATTCCATGATTACCCACCTTCTAC…
>DN28024_c0_g1_i1	len=234 path=[0:0-233]
AAATAATCAATGGAGACAGAGGTTGAGTTTGCTGCTAGAGTCGAGGGTGTATTGTTTTGGGCATGCGACGAATTTACTACGACTTGGAAGATGCAGGGGCCGCTGCCCAGGGCTGCATCCTTTCCCAATTACTGACCAGTGGCTTCCCTTAACAATAGGCTTGCTATAAATGTCAGAATTGTATTAGATATTGAGGTATACCAAAATTTATGGGAAATCTATGTGGTATTGAAG
>DN28093_c0_g1_i1	len=1479 path=[0:0-1478]
ATTTTATTTTCTTAAAATACATTTGATTTGAATTAATAATTAAAAATATAAATATAAATCCCCCCATCGGGGTGAGAGCGGGAAGGAGGATGGTGGTATTCGTACTGTCATCATGCAAATTAATATACGTCAGGCGAGGGAGGTGGCGTGGCCACCCCAGACAAGTCTCACCATGGGCGAGACGTTAAGGCGATCTAAGGTGATCTAATCATCATGATTATCAAACCCACTGCAGTTGGCAGAGCGGTGAGAACCATCAACGGAGATCCTTCAGCAGGTTTTCAGTGGCATAGGAGGTCTTCCGAGTAAGCTCCAGAGGGCGGTTACTGCGTTTGGCCCTAGGCTGCCGAGGGCGAGGTTTCACCTCTCTGTCTCAACCTTTGCTGGTATGTTTTGTCT…
>DN28086_c0_g1_i1	len=819 path=[0:0-818]
ACGTAAACAAATTGGCTTGAGTTTATACCTCTATTTACCCCTAAGTTCTCTTCTTGAAAACTGCTTCAGTTAACCTTTCCATGGTATTTTCAATTTTGAGCTTGAATGGGGAACCCGTTGCACCCCAGGTTCATCTTCAAAATCTTCAGGCTGTAGTCTGGTCTCTGTGGCAACAAGTGTTTTCTAATCTCCATTCCATCTACCTCTCCAGTTTCAATTCACAGTAAATCCTCCGTGTGTCATTTTCCTTGGTTGAGTGCTCTTGACACTCTGATACTAATCGGATGCAGACACTGTCAATGTGCAACAATACTTAAACTCTGTTGAAGTAAAAATAGAGATACAATTGTCTCAATTTCAGTCAATTGATCATTCAAATCTGTTTGTTCTCCTGTAATG…
>DN91593_c0_g1_i1	len=751 path=[0:0-750]
GTGCCTCGGGGGCATTTCATGCACAACAAATTTTATATGCAATCTGGCATTCATTTAAGTCAAGAGTAATTAGTATTTTTTGTTAGGACAGGCTTGACTCTTTAACCTTTTACAGATAGTCTGTTTAAATGATGATGCATTACTGTATTTCATTTTGATTTGGCCAATAATGCATCTCTTGTAATTTAAACATGTAGACTTGGTAAGTTGACTTTTACATGACAAGTGCTGTTAATTTTTTTTTACCAAATATGCCTCTCTTTGTGGTTGCAAACCCATATTATGGGCGCAATCCTTTAGGCTTTGAACCATAGAATAGCAGAATGAACAATAAAGCATGAGTTTAGGTGATGGACGTGAAGCTCATATAGGCATGGTAGCGAGTCAGATTGAATGAAA…
>DN91563_c0_g1_i1	len=290 path=[0:0-289]
GTTAGGCTATATTCCCTCCCTATAGATTTCTGGATACTTGAGATACTCGAAGGTATTGGACACACACTTGGAAGGTTTGTCAAAGTCTTGGAGGTGACCCGGCGTGGAAGAAACGTGTCATATGCGCACTTATGCGTCTATATGAATATATCCCAACCTTTACTGGAATCCATAGAGTTGGATTACTAGGGTGAAATCTGGACTCAAACACTTGACCACGAACACGTTCCATTCCACTGTTGTCTTTGTCACCAACATGGCCATCTCATGCGGGAGTGCCCATTGCGACG
>DN91587_c0_g1_i1	len=284 path=[0:0-283]
AGGCTCCATGCCTGAGTCAGCACCAAGATGATAAGATCCATAAGTGACCTGACAATTCAGCGCATCAGCAACAATGTATTCATTAGTCCCGCACAGATGCTACATCAACGAAATAATTTGACCAAGTTAACAATGGTCCCATGCTAAAGTCTGTGATCCATTGTGACCAGGTCTACATCTGCAAAAGCTGACCTGAGTTCAAGGGATGAATCAGTGGTCGTCCTTGACCATAATGCCCAAGGTCTATCTGTAGGGTTTGCCTTGGATAACACACTCTAGAGTCA
>DN91571_c0_g1_i1	len=219 path=[0:0-218]
GGAATATTCATGAAACTACGAAGTATGTTGATATTGCGATATGTTGAGGGATTTAAGCCTTAGGCATTGTAACTAAGTGCCTTCCTGACCAAGTGCTATGACCAAGAGCTATAGGGTATTGGGATATTGAAGAATTGTGAGACTATGCCTTAACCAAGAAAGGCTGATATGTTGATATGGTGAGGGCCTTAAGCCCTCATGTGCTACACCTAAGAACCG
>DN91542_c0_g1_i1	len=492 path=[0:0-491]
GTTGACTTAAAATTTAAAATGCTAGGCAATTTTTTTTTTGGGATTCCAGAGCTACCATTTTCCACTGCATTTCTCTAGACAAAATTCGATATTTTGTTTCCTCATCTCTACTGCGTTGGTCCCCTCTACTGTTGCATTTTTCCTCTTGCCTGAGTTTTGCCCTCTTTTTGCCTGTGTTTTTCGTATTCCTGTTGCATCCCTTCCTTGTCGATCTACATTTAGCCTTTACCCTGCTTCATATTGCCATCCCTCTCGGTGCTGCTATCTGCGTCCTCTTCACTGCCTCGTGACCCTTTCTGCATTCTCTTCAGCGTTCCTTGTATCTCCTTTGACCTGCAAAAACTTACATCCTCACCTTCGTCGACGGTGCCATCTCCCTCGAAGCTCCACCCTTTGCGA…
>DN91507_c0_g1_i1	len=236 path=[0:0-235]
GCATACAGTTACCATATGTTTGCGATTAACCGCATGGTCATATGCGTTGGGCTGAAATTGCAGGTTTAAAAACGGGAATTTATTTCAAATGCATGCTTAAGCTCTGGCAGCCCTTGAGAGACTAGTGTAGTGGGGAAAAAAGGGTTTCATTATTCAGTGCTCTGCATTGTGATGATTAAACACGGGGAATTGAAGAAAAGGCCAAGAGAAAATAAAAAATAAAAAGGGCATACTCT
>DN91529_c0_g1_i1	len=275 path=[0:0-274]
TGGGTTAATAAATAGGCAAACTCAATTTTTTTTAAAGTGGTTTCATCTTTATTCTATGTCAAATTATCATGTATCGATCGTATCTATCATGTATCTCGATGGTATCCTGATTTTGTTAATATTTGCCGATATTTGCAGCATAATTTCAAAATGAGAAGCTAATACCTTATCCGTACCCTATGGTTTTATCCGTACTCTATGTTTTATGGAGGGATAGTTGTATTCACTGCAAATCATTTTTTTGTGGTTTCATTTTGTTTTATATCAAATTCTCA
>DN91501_c0_g1_i1	len=384 path=[0:0-383]
GCCGATTAATGGAAAGTCTGTTTGGAAGGGGCCTCAACCACAACAGAGAACATGCATACAAATTTTGAAAGCTGGAAAGAACCTGTTAATGTTACATAAGAAAGCGTTGCCAAACTATTTCCCAGGAGATGGTGAAAGCAACCATCTTACACACTAATCCCCAAGATCATCGGTATGCCGTTAAGTCTCATCCAGGACAACATATAGCTTTACAGCTTTAAGGTTGTAAAGCACATCAGGGAACATTAAAGGTGAAAATAAGATGGCTTCATGGTAGACTACATAGTACGCGAACGCAGTGCACATTTGAGGAAATCTAGGAGATGCTATGGGATAATATGACCTTTCAAAAAAGATTGAGGTTCTTGACAAAACAAGACTAGA
>DN91506_c0_g1_i1	len=318 path=[0:0-317]
TATGATTCGAATAGTGAAAGTGAGAAAGGAGAAAATGGGAAAATATTGGTCTCCGAAGAACTCTTGTGTTAGGAAAATTGAAATGGTAGTTCCCATTTATCGCAGTGGGTTATGTGATAGATGCAACTTAGTAAAGAAGGATCCCTTATCTGGCCATAAGAAATTGTAGGAGTCACATTACAGGTCTGTGGAAGGCACAATTAATATTCATTAACTGTGGGACACCTCGTCAACATAATTGGCCCCAAAGTCTAGTGGGACATGACTTTATCTTAAACCATGTACATCAGTTAAAGGCCACAATAGGTACTACAAAGA
>DN91519_c0_g1_i1	len=263 path=[0:0-262]
GAATGGCTCGATTAAAGTCATGGTTGCAGGACACCTGGGCTCAAACCAAGGATATATTTGGAAACTAAGGGGATCAATGATGAATCAACATCTATTGGAGCACATTAAAACAACTAGGAAGTAGCCGGTCAATGTTGGTCAAACTTGACCAGTCATCCAAAAGATCCCCTGGAAAAGGGGCAGTTTTAGGAATTTTGGGGATTCATCCTGATTTTTTGTAACAAATGGATAATTTCAACCTAATGAAGTGGGATAACATTAAT
>DN91502_c0_g1_i1	len=296 path=[0:0-295]
TCTTAATATACAAAATGATCCAGCTATGTATACCGATGGAAATCTTTCTCTGGCTGTCTGTCTCCGCCAACGGTTGGATCAACTCTCCTCTATGTGGACATGTTTTCTCTCTATCTCTTTCTGCCATATTTAGAGGGAGCAGAATATCTGAGCTGATCGGCTCTGGCATCTTGGCTTAGCTTAGCTGCCTAGCCTAGACTGATCCACTTTGAATGCTGGGCTCCAGTGCCTTTTTTTTCATTTTCCTGAGAGGTGTTTTTGGTCTTTTTTTTCCTCTGGACACTAGTCATTTCAAG
>DN91590_c0_g1_i1	len=313 path=[0:0-312]
TAGATCAGGTAATCACTTGTGGGCTTACATGCTTCTAATGCAAGTGTACTTAGTAGTCTCGACACCAGCATGAGAAAGAGAATTGTGTTTTTACAAATAAGAGAGTACATACAGGAAGTAAAATTCATTAGGATGTCTCTAAATTTATTACTTATAACATGTGCAAATGACGAGAAAGGTCATAGGAAGAACTATTACTTGTTGCAGTATTGTTATGGACTCTTATGAAAGTGATAATGGAAATGAACAGCGTGATTATGGACTGACATGAAAGTGATAGTGGAATTAGAAATGAACAGCGTTTAGATTGGTA
>DN91528_c0_g1_i1	len=208 path=[0:0-207]
ACTAAACACAATGGTGATTGTTTTAAAATTATGGTGAATAATGCAATGTACCAAGTAATTATTTCCACACATAGAATGGCACATCAAGTGATGCAGAGGAGCTTCCTCATGCAATTGACATGGGGCAACCAACTCAAGAAAGCTCATCAACACAACCCCCCTCAAGAAAGCGTTAGTGGGGGGATTATGGTTCAAAGCAAGACAAACA
>DN91531_c0_g1_i1	len=300 path=[0:0-299]
GTTCATGGTCCACTGAAGATCTTTACTGATGGATAATTTTAATTTTTAGATATTTGTGACAACCTTTCTGCATATTGTCTAAAGCCTTTTTGCATATTGCCATATTGTCTAAATGCTGATTGTAACACTGTAATAGTGAGTGAAAATATATGTTCATCATTCATGGAAGCTCATGCTTGTGATTCACCCAAGCAATCCTTATTTCTTCAAATGAGGCAGTGATCAGGAAAAGACCTGGAGTTTTCCTTTCAAGCTTGCAAGCATTGCACACATAATAATGCTTTCAATCATTTCAAGTGT
>DN91518_c0_g1_i1	len=261 path=[0:0-260]
GGAAAATTTTGACAAAATTGGATTCAAAATTGCAAATCCAAGCTTGGCTCAGTCTAAACCAGAAAAACTCTTTTCCAGCCCAATCTGAGTCAAACTCCCAATTCAGCAAGTTTGACTCATAATCCATGTGACATTGGTTTGTTGTAACACCCTAGTTTGTTCCAGTTGGATTGAATCCCTATAACAGTGTTTCTTTAATCTGCACCCTCAAAAGAGAGTCTGTTTAAAAGATTGTCCAAGAAGCTCAACATGTTTACAACT
>DN91555_c0_g1_i1	len=352 path=[0:0-351]
AACAGTACATGCCTATTTCAAGGATAATATTGTAGTAACATTGGAAAGACGAACCAATTATGGGGCATGGTGGACTCAAATAAACATTTTTGAGAACAAGTCCACGTCAACAGGCAATTTTGGTCCTCAATAGAAACTGTTTCATTTTCATTTAGGGTGTTTTCTGCTTGAGCCAGAGGACTGAATCCAACAAAACAGTGAACTAAATTTTAATGAATTAGTCAAACACATTTTGGTGCAATCATGACTTGGTTGAACCTTCAAAGGTGTCTGGACTCTGTACATCATAACTAAGAATGTACCATATTTTCCTCATCAAATATATAGCAATTACTTTCGAATAATTCATGGG
>DN91553_c0_g1_i1	len=366 path=[0:0-365]
TCACACAAAACTCAGCCCCGTGACTTCTCTCCTCCTTTTTATCTTTCTCTCATCTCTCACTGTTAGGTCCACTGGTGAAAACCCATTCACCCAGAAAACCTATTTGATCTGGTATTGGAACAAAGAGATCCAAAACAACCAAGCCAAGCCAATCTTTCTCCTATCCAAGGCGTCTCCATTGAGCGCAACTGAGTCAGCCAGTTTCTCCAAACTCGCCGCCCAAAACGCTCTCTCCTCTCGACTCTCGGCCTTCTGTGCCTCCGCGAACCTCCTCTGCTTCCCCGATTCATTACCATCAATGTTTGGCCAACAAGACAGCCAAAGAAATTACAAAATCAGCTATCACCCCCCTCTCAGTGCCAAGGG
>DN91503_c0_g1_i1	len=438 path=[0:0-437]
AAAGATTATAAAAAATAAAATAAAAAAATAAGCATTGTATATATATATAACCTGCAACCGACCATTTTTAATATTTGAAAAGAGGGAGTACAACCTGCAACCATTAGTCGCAGCCACATTCTTGTAGGGTTGTCAGTGAGCAACACCACTGCCCACTACTGGTGTCATTTCCGCCATCGACGATTTTTCTCTGTTCCCAGCATTCAAATCATGGTATTTGAATTGCGACAACAAGACAAAAAGAATAATGCTGTGTGTGGTCAAACCATAAGGATCACATATCTTCCAAATCGATTCCAAAAAGAAAAAAAAGATGGCAGTCACGTCCATCTCTGGTATCATTTTGGGGGTCGTCCATGTGTGGTATCATTTGACATTTTAAAATTAAACTAAGAAAAA…
>DN91543_c0_g1_i1	len=405 path=[0:0-404]
AATATAATGAACATTTCTGGAAAAAATCAATGCAAATTTTAAAAAATTTCCAGGAGTATTGAATTTTTTTATGTTTTGTAGTGATATGTCAAATTCAACGAAGAAGTTCTGCTGGGTGTTGCTGGTTATTTTTAGATAATTTCTGAACATTTCATATTTATTGATTGTTCTCAGAGCTGGTTATATTAGGTTAAATGTGGGTAAAAGATTGTTAGTGACTTCTATCTTCAATATAATAAATGTCTACACAATTTATTATTATTGACTGTCACAGATGGTTATGTTAACCTGAATAATTTTCACAACTGCATATGTTATGATAAACTTCATTATTGTTGTTAATGTTCAGCCAAATTATGAAAAGCTTTGGTTGAAGTCATTGTTAGTGAATGATCTCAC…
>DN91504_c0_g1_i1	len=384 path=[0:0-383]
AATGATTTCTTTTTTATAAATCTATTAAGAAATTGTTGCTTACAGAAGGATCTCATTTCTAGGAGTTGATACAAGGGCCCTTTGCCAGTCTGTAGGATGTACAGTAAGTTAAATATCAAACTATACATGTTTAGAAGGTATTTTTTTGACAGTATGCAAGGAGCAGACATGTTTAGAAGGGAGTTTTATTGACAGTATGTGAGGAGGACAGAATAGTCCAGCAGAAGCGAAGGAGTCATTCTATGCTAACAACTGGATCAGCAGAAAATCATGCTATGCTAACAAATGGGCAATTAGAAGTCATGTATTATCTTAGGGTTCTTAGCTTAGGTATGCTGCACGAATATAATCTATAGCTAGAACTTCTACCTTCCATTAGAATTG
>DN30171_c0_g1_i1	len=426 path=[0:0-77 2:78-425]
AAGCCAACAAGGGCTGGATCAGTTCTACGTTCGAGGCCAGATAGAGCCATTTCTGCGAATTTTATTCGCCATGTTTTGGTTTGAGCAGTTGACATTGCGTTGGTGTTACATTGGTTTGCCGGTATACCAGGTCTGAACACAAATTAATTCCAGGTGATTTTGTTGGAGTGCTGACGGCAAACCGGAATTCTGTGTGGAAAGTTCGATGGAAAAATTTACGTATACAAATAAAACACCTTTTTTTGGGGTCCATCGCATTGACGAAAAATGGAAGAAATCGCGTGGAACTTGGAAGTGGAGAGGACAGTGAAAGAAACCGGTCACCCTCTCTGACCGACGAAATATAATATTCTTAGAAATATAGATTCCTTCAAAAACAACACTATTTAAGTCAACGTT…
>DN30171_c0_g1_i2	len=418 path=[1:0-69 2:70-417]
AAGGGCTGGATCAGTGCTACTTTTGAGGCCAGATAAAGCTGTTTCTGCCAATTTTATTTGCCATGCTTTAGTTTGAGCAGTTGACATTGCGTTGGTGTTACATTGGTTTGCCGGTATACCAGGTCTGAACACAAATTAATTCCAGGTGATTTTGTTGGAGTGCTGACGGCAAACCGGAATTCTGTGTGGAAAGTTCGATGGAAAAATTTACGTATACAAATAAAACACCTTTTTTTGGGGTCCATCGCATTGACGAAAAATGGAAGAAATCGCGTGGAACTTGGAAGTGGAGAGGACAGTGAAAGAAACCGGTCACCCTCTCTGACCGACGAAATATAATATTCTTAGAAATATAGATTCCTTCAAAAACAACACTATTTAAGTCAACGTTAATTTAAA…
>DN30190_c0_g1_i1	len=363 path=[0:0-139 2:140-362]
AAACCATCAAAATTCACTTCAGAAATTCTTGCTATATCCACTCCATTTCTCTTTCAATGGCTCGTTGGACCATGTGAGGTTAAAGAAATAGAAATTAATGGAGTGAACCAGAAAAGCATGGTCCATATAAAAAAATGCAGATTTTGAGGACATGAGCTGTAACATGATATTTGGAAAAGAGCCACCACCAGAAGATTCTACCATGAACCATATTTGCTATGGGTCATTATGCAGTATAAAGAAGAATAAGAATACTAAGGATACAAAAGATCATTGAAGATAAAATCATTTCATTACAGTGATGTGAGACTATGTAAGACCATGTTGTTACTTTATTTTTAAAAACACATAACCCTATTAAAA
>DN30190_c0_g1_i2	len=470 path=[0:0-139 1:140-246 2:247-469]
AAACCATCAAAATTCACTTCAGAAATTCTTGCTATATCCACTCCATTTCTCTTTCAATGGCTCGTTGGACCATGTGAGGTTAAAGAAATAGAAATTAATGGAGTGAACCAGAAAAGCATGGTCCATATAAAAAAATGCAGGGTATTGGAAAGTGTTAATTGTGCTGGAATTTGTATGAATGTTTGTAAAATTCCTACTCAACAATTTATAAGACAATATCTCGGGACACCAATAACTTTAAATCCTAATTTTGAGGACATGAGCTGTAACATGATATTTGGAAAAGAGCCACCACCAGAAGATTCTACCATGAACCATATTTGCTATGGGTCATTATGCAGTATAAAGAAGAATAAGAATACTAAGGATACAAAAGATCATTGAAGATAAAATCATTTC…
>DN30133_c0_g1_i1	len=631 path=[0:0-630]
GCACCACAAAGCATTTGATCCCTCCTGGAACTTAAGATGGATTTACCCTGATCCCTGTATCTGAATTTGATCCCTGTATGTGAATTATTTTATTAATAGTGGTAGTATTTTATTTAAGGGAACAGGCCCATGTACATCGACAGAAAATGAATCTATGCCCCGAAACAACATAGCAGGTGTAACGGCAACTAGAAACAGGAACTCATGGAAGCACTCCCTAGTACGACAGTCACGTAGCATTCAAAAAGTAGGGAACTGAAGCTCATGTCCATTAAATGCCATGCATCCCACAAACACTACGTAGGATGGCTTAATTAGAATCTAGAACCAAAAGAAATAGTACAAAAAGGTAGACAGACCACCAACCACGGTGAGAAACAGTGCACTGGTTTGCTTTCA…
>DN30139_c0_g1_i1	len=798 path=[0:0-797]
CCCTCTCATTTCTTCAGTCCTAACCAACTTATAAAATTTCCTTGGTAAAACAAAGGCAAAGGATGAAAAGGCTATCCACTCGCATTAAAGTGTCATTTGAATCATATCTTAATGGCATTTTCACTTCAACAACACTCATAACCATGCAACTAGAATCTGTTTTCATTATCTGTTACTTTAGAACACATGCTGCAAATGCTCACCAAAAATAATTTCTGCCAGTTGAAAATTAAAAGAATTGCAACCCATTTCTCTTTATCTAAAATACGAAAGTCATGGGCTCTAGTATATGGTATCCTTCTCACATAAATTGCATCCAAAATCGACACTCTGAAGTAAGTACAAACATATAGTCAGATGGCAATGGAAAAACTACTGAGAAACTTATGCGACAATATA…
>DN30162_c0_g1_i1	len=483 path=[0:0-482]
CTTCCATCTCTGCTTCCTTAGATTCCCCCTCCATTCATAAACTTAAACTTTGACAGGGCCTCTAATGGAAACCCGGGAAAAGCTACTTATGCTGCAGTCTTCCAGGACCACATGGGAAAGATCCTGTATCTCCTCTCGTCCTATTGGTATCAAAAGTAATAATGTGGCAGAGCTCAGAGCTTTAAAAATGAGGTTACAGTTTGCTCAGATTGAGCAGTTCCATAAAGTGGTTACTGAAGGTGATTCACAACTTGTCATAGCCATGATAACCAAAATTCCACATGGTAAGTCAACAAGCAAAGTTTCAAAAAGTTGGAAATTAGAAAGTGGTCCGGAATGAGTTGCCAGCCTTCCTTCCTTCAATCCCGGCTATCATCACTTCACATGTTAGAAGATCTG…
>DN30123_c0_g1_i1	len=236 path=[0:0-235]
AGCATTTTCGCTCCAGATATACTGAAATAACAGAGCGGCCGGATTCAGAAAGTCACCCAATAAATTGAAGTGTAAAACTTAAAATTCGCAAGCAATCTTAAATCAAACCAGGAAATCCAAAACCCTAACTCTACACACAAACAAATTCTGTCGGCAGAAACGAAATCTCATAAAACTATTTCGATAAACAGAATCCCCAAAAAATAAAACTGTGAACAGAGCCATTGCAGTGCACA
>DN30172_c0_g1_i1	len=520 path=[0:0-315 2:316-351 4:352-407 5:408-519]
TGAACTGTTTTAACAGAGTTCGGCTCAATTGCAATTTCAACTGTAAAGATTTGATTACTACAAATGTCATGAATGAAATTATGAAGGAACCCAAGAAATCTATTTTGATTACTCTTTCACGTGTATCGGTATTTTCACAATGTTATACCCACAAGTCTACCAAAAAATTCATGGTGTCATTATTTCAATCACTGCATCAAAGGCAGATCCGTGGCATAAACACATACACTAGCAGGGATCAACACGCAAAATATAGCATGTACTGTAGCAGGGAGGATATAAGCAGATTGTGTAAAGAGGGAAGGTTGAAGGAGGCCATGAAGCTTTTGTATTGTGGGGACCTTCAGGTAGGCTATGTCACCTATGCCAGTCTCTTGCAGGGATGTGTGGATACAAAAG…
>DN30172_c0_g1_i2	len=259 path=[1:0-54 2:55-90 3:91-146 5:147-258]
CATGATTGACCTTCTTGGCCATTCTGGGCGCTTGGGTGAGGCCAAGAAAGGAGGTCATGAAGCTTTTGTATTGTGGGGACCTTCAGGTAGGATATGTCACTTATGCCAATCTATTGCAGGGATGTGTTGACACAAAAGCCTTGGCAAAGGGTAAGTGGATCCACACCCATATGATAAAAAGTGGGTTAGAGCGAAATGTATTTGTAGAAAACAAACTAATCAACATGTATACTAAATGTGGAAGTGTCAATGATGTGCA
>DN30144_c0_g1_i1	len=276 path=[0:0-275]
GGGATTTGATGCCTTACAGTGCTTGATAGATCTAAGGTCAACATGGATCTATGATGGTTGATATCCTAAACATGGAGGGTGAGAGTGAGAGTAATGAGTGTGAGAAATTAAGGGGAAAAGTTCACTTGTCACGAATAACATGATAGACATTTCAGCCTCAACATACAATACCATTATTTATAAATTGTTTTCCATATCGTAAGGCATTTGCACGCCTTTCAAACATGATTTAACCATGCATACATATGCTAAAATGACCTCTAACCCAGAAATTAT
>DN30145_c0_g1_i1	len=278 path=[0:0-277]
TATTTATTTCTTAGTTCATTGATTAATTCCCCGTAGCCCTGTTTTCCATTTGTTTTCGCTCTCTTGAAGCCTCCGTGAGGTTCCTCCTCGTTGCCTCTTCCCTCACAAAGCGAATGGATGGACGAGCGTGATTGATGAAAGCAATAGAGCTCGCCTTTGCTCCTTCAGTGGTCGGTTCAAATTTCGTTGATGTCCGTTTGGTTGCTTTGCTTTTCTCTTATCTGAATTTAATTGGAGGGTCTATATCAAAAATCCTTTAGATCTGATAAACAAGATAG
>DN144_c0_g1_i1	len=222 path=[0:0-221]
TACTAAAGATGGTGGGGCATGGTTTTGTTCTCTATTGAACGTTGTTGAGGTGACTGATAAGAGTCTTTGAAACCATAATCTGGTAGTGATTTTTATGATTGATATTTTGGGTTGGCTGGTGATTTTCCCAACAAGGTAGGATGTATAAATACTGTGTAGTGATTTCCGTAAGGTTTGGAAACAAATTAAAGAGTTTGACATTTATGTTTTTGGAAGGATGGG
>DN179_c0_g1_i1	len=252 path=[0:0-251]
ATTCAATCGCTGATTTTTTGATATTTTGCAGTCCACACGACTCTCCTTAGACTAGCCAATGTGTGCACTGATTGCTTGGTCGATTTGAAGCCTGCATGTGCCTTGTTGATATGATTATTGAGTGGTGATTTTCTGATATTTTGCAGTGGAGACACGGCTTTCCTTAGAGCTAGCAAATATGTGCACTGATTGCTTGGTCGATTTGAAGGAAGTCTGCAAGTGCCTTGCTGATATGATTATTGAGTTGTCGTG
>DN159_c0_g1_i1	len=450 path=[0:0-449]
TGTCATATTCGATGTTTATAAAACTTTTATATAACAACTATTTTTTTACTTTCAGATATATATCAAGTTTACTAATGTTTATAAAAATCGAATATGACAACTGGTTTTCTACCTTCAGATGTACATGAAGTTTACCCAAAAGTGGCTAAAAACTCATCTCCTTTATTGATAAGGAAGGAATCGATGTTGCACATCTAATTCCTCGGGCTCTTGGTTCGGTATACATCATGTTGTGTCCCTTGAGATGGGCTGTCAGTTATTACATGTTTGTTCTATCTCAGAAGTGCAATTTTTCTACATTCTCTGTATCCCTTTACCTTTTTCAGTTCCTCCATTCTTTTAATAAACTGTTCCTTAGTTCATTCTTAATTGATGCGATGTTTTTCGCTTTTATATGAT…
>DN130_c0_g1_i1	len=483 path=[0:0-482]
AAAAGGAGTTCCGGAGCTACTAAAACAGCCTCCACATCTTTGTGTTGAAAAGGTGATATTCACCTCTTGTTTGAGTTCATCAAAGATTTCATTTATTTATAAAAATTCACTGCTGCATCACATCAATACAGAAATAGTTGATGCTATAATTGACCATCATAGCTGTAAAACACTGGTCAGTGTTTTACAAGATTTCTACTATTCAGAAGCTCAAAAACACAAACTGTTAATCTGGCTCAAAAAGCTCTATTTAGGTGCATGTGATGATTCTTATGCAACCCTATTGATTGTGGTTTTCTTTTTTGCACACAATAACTTGACTACAAGAGGCTATCAAACATATAAGGTTTCTTTGTGCATGTGAATATATGTTGATTTTTTTTGCACAAAACTTAAAAG…
>DN194_c0_g1_i1	len=344 path=[0:0-343]
GTCCATACAAGCTCTTTGCATAGCGTTCCCGTCCGACACATCAGATCACGGACGCCAATGCTCGCGTGACTAGATTGACACTAGATGGTAGAGGGGGTTCCCACAGATTCCAATGCTAATATATCGTAAAGGGACAATTAAACTATGAAGTCGTGAAGTGAAACGCTTAAGCGAAGTAGGCGAAAGCGGCGGCGGCACCGAACATGGCAGCGATGGGGCTGCCGATGAGGTTGGCACCAGAGTCGGTAACCTCAGGGAGGCTAGCGCTGCCAGTGGCAGAGCCGGAGGCGGAGCGAGAGAGGGTAGCAGTGGAGACAGTGGAGTTGACACCAGCAGAGGGGCTA
>DN177_c0_g1_i1	len=413 path=[0:0-412]
AAATTCTCAGTCGTTCATTTCGTGGTAAGCAACTTTTGTAATTCTCAGTCTTTGCCTGGGATCAAATATTTTTCGAGGAATGGCCTTGGAATGAGAAAACAACAATCATTCTGTCATGAAAACCCTCACCAGAAACCTAAATATTGCTCCCTAAACCCTGAAATTTCAGTCTATTTGCACGTGATTTGCGCAGATGAATTTATTTACAGTGAACGATGGTATGTGATCGTGAATTCGTTGAAGTAAGGTTCTGGAATTTGAAAAAAACTAATTTTCCCGCCTGAAAAGAAAAATCCTCGTTGAAGGCCTAGAAATCGCATTAGACCAACAGAGATAATTATTTTGTGCGCTATATTGTATTTTGTCTAATTTCGAGCCAGGTTTTATTTAATTTTGCGC…
>DN149_c0_g1_i1	len=431 path=[0:0-430]
AAGGCTTGCATCCCATTAACATAATGGTGATTGCTTGCTAGACAGAACCTCTTGGAATAATTCCAGGCTTGTAACAATAGCATTTTTTTCACAATGTGTCACAATGACATATCTGCAATTGCCTCCATTTGGTCATTTCAAATTCAAACTTACCCATGTCAAAATCAATTCCATTTTTGGAGTGAAAAACCAATCAATCCACTCAAACATCAGCAGCAATGGCTGCGCTCGTCTCTTGCAACTCTGCACAAACCCCCACTCACTCAAATCAGTCCATGCCCACATGGTCATAACGGGACATGATCAGGATGTATTTTTAGGTGCCAAACTCGTCAGCTTGTATGCTAAGCTTGACAATCTAGAGAATGCACGCTCTGTGTTTGACAAAATATACAATCG…
>DN198_c0_g1_i1	len=893 path=[0:0-892]
AAGGTTGGTGAGCTGGGTCCAACTTGGACTTACTCCTGAGCGGTGAAGGAGTCTGAATTCACTGCTCTGGACACCATATTATTGTCCATAGTCACCATCGAGGACGACCAAGTTCGGTTAGGCAGTGGATTTATCTTGCAAGGTTAGTGAGCTGAGTCCAACTTGGGGATACTTCTGAGCAGTGGAGTAGTCTTATTTCACTGCTCTACACCCATATTTTTGTGCATAGGCCTCGTCAAGGATTCTACCGTAGAGCCCACTTAGAGTGTTACCATTAGCACTGTATAGAAGAATTGTGAAAAAACAAGGAGTGCCTTTGATAAACTGAATCATGGTGACAGAAAGAAGCGTTGGTTAAATATGGTTTAATGGGACATGTTATATAAAATTTCGTTAATG…
>DN164_c0_g1_i1	len=455 path=[0:0-454]
CGATTCGATTCAAAATTATAGTGTTCTCGAGAGTTAAAATTACATAACTTGTGACAATTTGCTATTGGATTTTCTCAGTGGAAGAGATTAATAGAGGAAAGTGGCTTTAAATCTGCAATGAAAACTACTGAGTAGGTTTTGAGCCATGGAAGTATTGTTATGTTTTTTTTTCGGATTTACTGTGGCGTTGGTTCCGCATAAGGAGTTCGCTTTCCTGCAGAGAGTCGACCCTCGAGACACGGGTTCAGATCCTCTTCTCTTCTTGGTGAGAATCAAATGGTTCAGCAAGTTGGGCCACCAAGGCTTTTTCCCATGCCATTGAATGTTTCTCGTTTGGGCAATAATATGATTTGGTCGTAAACTTGAAGAATTGAGCAGCCAGTCTCGTAGCTGCTTCCT…
>DN178_c0_g1_i1	len=332 path=[0:0-331]
GAAGGATGATATCATATGGATATATAAGCATTTGATCTAGAGAATCTCCATAACTCAGTATTTTCCAATTTCTAGTTATATCTCTAGATCACATGGAGACAATGAATTCTTTCAAGTTTCACATACAAATGCATTGTTTATATTGAATTGATTCCATATATACACACTACAAAATTACTTCCATATATATGCATTGCACACATCATACGGAAGCAGTGCACATGCATATGCACTTTCATATATGTAGCATATAAATGCACATATACAAAAGTGGATCATATATGGAAGGGATTTTGCATATGCATGTAGAGCATACAATTGTGTATATATAG
>DN131_c0_g1_i1	len=412 path=[0:0-411]
AAGTAGTTACTTTTCCATTGGTTGCAACAGCCCTTTTGGCTAAAGTAGGTACTTTTCTGTTGCAAGCAACAGCCTTTTTGGTTGAAGCAGGGACTTTTCCACTGGAGGTAACAGTGATAACCACGGTAATAAGCTATCTAAAGTAGGCTAAAAGCATGGATAACCTGTGTTGGCCAAAGATAGTTATAGAAGAGGAATAAGATCATAAGAAAATTTGAGAGTTAATGAAATATCAAGCTGCATGAATGACCTAGCACCAATGGAGAAATAAATAAAATTGTGATGGAAAAAGAGAACTTGCATTTTCTGCAATAAGAGTGTGGTGGAGACGGAATGGCACTTTGTCATGGAGTGTGCAGCATATAAGGATATCCGCATTTAGTATGAAAATAATCTAAA…
>DN114_c0_g1_i1	len=532 path=[0:0-531]
TTTTTGGAACTTTCTACACTTCTTGGTTTCAAATCTGGAAGATTTAATTACTCAATGGACTGCATACATTGCTGAGGATTCTGCAATTCCTCTATTCACAATTTGGTTTCAAATCTGGAAGATTTAATTACTCAATGGACTGCATACATTGCTGAGGATTCTGCAATTCCTCTATTCACAATTTGCGAGATTTGGAATGCTAGGAACAAACCCATTTTTGAAGGTATTCCAATTGACATGAACAAAATCTGTTATAAGGTGATCAATTGGGTGGGTACTCTCTCTCATATAAACAGAGAAATAGGAATTTGGTAAAGACTAGACTTGCTCCTACTATCAATATGCTAGCTGGATGGTTTGATGGTGCCTCACAAAGAGGAAGTTGGGGTGGTTCTCATG…
>DN163_c0_g1_i1	len=306 path=[0:0-305]
GCCCTAAATGCGAAGTATGGGTGGAGACTAATTTATACTCGTAACCTATGGACATCCATTGTCACTCATAAACAAATCACTCCCTACTCCTTAAAAGAGAGAATCAAGCGAGAGGACATGTATGCTAACATTTCTATGATCTAGAGGTTGTCCTCAATTCTTTTGATATTATTAGCAACGAGTTGGCATGGAAAGTGGGAAAGGGGACCATGTGTGTATAGGTCTCAATCCTTGATCATGGAACGATAAAGGCAATCTCACCCCTCCTCTAATCGACCATGTAAGGGACAAAAGTATTTCTAAGCT
>DN102_c0_g1_i2	len=259 path=[0:0-258]
GGTCCATAAAAGGGTGATGATAAGATTGGTAATGGTCTCCATTCTTTTGCCCTTGAATCATCCATGTGTCGCATGGCCAGACTGTTGCCTCCCAGGAAAGCTTGTCAGCAAGTGTGTTGCATTCCCTGTATATATGACAACATGCAAAGTTGTCAAAAAAAGAAATGTGTCGATGGACCTCATCCAAGATAGGCCTCAGAGTGTATGTATGACATATTTATGTTTTATTTATCCAGTTGCAAACTATTTTTGAATCCCG
>DN166_c0_g1_i1	len=539 path=[0:0-538]
GGCCAACATAGAGGAATGGGAATGGCAGTGTGAGAAATAAGTAGACAGCACGCTCCCTACTGCCCCAACCCCACACTGGCAAAATCTGTTAGATGGATTATTTCAAGCACAATATCAATGTGGCGGGCTCCAGCTAATAAAAAATCCTCCCATAAAAAGAAGGAAAAAAAACTATTTTACTGTTCTTGGTTTGAGCTTACCCCCACCCACTATAGGGGAGGCATGGGCATCCCTGTGGGAATCAAGGTGCATGGGTATCCTGACAATCTCTATGACAAGGTGCCACCCCATGACATCCCCAGTGGATAGGGGGCACCTAAGGGATACCCCCAAGCCGTCCCATACCCAAGCTGCAGACACCCATGACTTCATCCCTGTTCCTAGGATGCAGGGAAAGCA…
>DN108_c0_g1_i2	len=240 path=[0:0-239]
TTTTGTGAATATTCAAAGTAATCATCTACTAACATGATTCATGACTAGGAAGACAGATATGATTATTCATATATAGGAACTAAAGCACAATAACACAAAGTACAATTTAGGTGAAGGAAATTGAAAAATATTTTGAGATGTATCTGTCAAGGGATGACAAGAAACAAATTCAAATAGCGTCAAAATATCTGGAGGTTTATGTGGTTCTATGAAAGGACTTGTGTGTCGTCAGTAAAGTGG
>DN109_c1_g1_i1	len=274 path=[0:0-273]
TGGGCACATTCTATGTTGATGACATGACAACATTTCTACTGATAGAAAGTATACCAACACATACACCATCTTCCACTGTGAGATCGTGTGGCCAAAAAAATATCAACAATCTGGACCCCTATTTTGGAAAATGTGCATATCAACTAATTAATTCAAACACTAATTTCTCTACTTAAAAGGAGATCTTGATGTTAAAGATATCTCACAAATATTTTTTTTCCTTTGAAAAAATCTGACAAGTATTGCTACGATTTTCATTACAATCATAATAAAA
>DN109_c0_g1_i1	len=401 path=[0:0-400]
TCCATAGCTCCTTTGTATAGGAGTTTGTTTTACAATCTTTCAAGTTTTATTATGATTGTAATGAAAATGTTAGCAATATTTGTCAGATTCCTTCCAAGGAAAAAAATATTTGCAAAATATCTTTAATATCAAGATCTCCATTCAAGTGATGAAATTAGTGTTTGAATGAATGAGGTGATATGCATATTGGCCAAAAGAGGGGTCCAGATTGTTGATATTTCCACACGATCTCACAATGGAGGATGGTGTATGAGTTGACATGCTATTAACATAAATGTTCTCTTGTCATCAACATAGAATGTGCCCATAGCTCCTTTGTATAGGAATTGGTTTTATATTCCTTCAAGTTTTATTATGATTGCAATGAAAATGTTCGCAATATTTGTCAGATATCTTCCA…
>DN117_c0_g1_i1	len=381 path=[0:0-380]
TAGTGTACGCTGTACACGTAAATGGAGATCTCTCTTACTGATTGGATATACACTATGAGTTGTACACAGAATTGTAGGTTTCCCTTACTAATTGGATATACTGTATGTTTTGCGCACGGTATGTTTTGCACACGGAAATGTAGGTCTCCATGACTTACTGGATATACAGTATTTGTGGGTGTAATGCACATAGAAACATAGGTCGATAATATTGAAAAGATATACTCTATATGTAATGAACACAGAAACAGTAACACGTATCTGTATTTACTGATTATTATCAGATGTGCAGTGTTTATGTGTAGTGCATCACATTGGTCTTTTAATACAGTATTTGTGGGTGTAATGCACTTAGAAACATGGGTCTATAATATTGAAAAG
>DN113_c0_g1_i1	len=205 path=[0:0-204]
ACTAAAGGTCAGTGCTCAGCTCTGATGAAGTAGTATTTAGTTTATGTAGATATTAAAAAATTTCGCTGACATCGAGGATCTCCTTGGGTATTTGCCACCCATGAGCCGATACCTGGAACACTTACATAAAAACGTGTGGATTGTCTTCTACCACCATAATACCAGGGAGTGCCAAAAATCCGTAGATGCAACTATTATTTGGAGT
>DN103_c0_g1_i1	len=264 path=[0:0-263]
GTACACTTATATTATACATATGCTTTTAAATAATATTATACATATGCTTTTATTATTTAATACAGTATTTCTAGTAGCCCGATACAATTACTTGTGCAGATATTGACATACTTTCATATTTAAAAGGAGGGCAAATCTTTCTGCATCGTTTAGTCAATATATCTCCAATATCTCTTGCACAGTGGAACTCTGTGCTTGTTCAGTAGACATAAAGGAAACCACACCACACTGGCAGCCTTCCAACCGCCCGGGCAAATTCGATTT
>DN88680_c0_g1_i1	len=332 path=[0:0-331]
AAACCCAGAGAGGTAATCTAATGTCTCTCTTGTTCATAAAAGTCTTACAAGTTCACTCTCCTGGTGAACAAGTTTGATGCATCAATACGACCACCTCCTTTATCCATTAGATATTTTAGTTGCCCACATAACCAACAACAAAACAAAGCAGGAATTGTCCAGTGCCAATTACTCGTTTCACAGAAGCCTTTCTCGTTAATGTGTACAGAAAGACCATTTGTAATGATTTTGAATGTCTTGCAATAGCCATTTTGTTCTCGATGTGAGCCTGACAATTCTGTAAGATAAGCTTCTCCCACCATTTACCTTTGAATGTAAACATTGCATTGAAA
>DN88621_c0_g1_i1	len=227 path=[0:0-226]
GGATAAACTATCTAGAAAATCCTGCACGATCTCGAATACAACTGGGTTAACCTTTGTAAAACCACCGTATTTGCAGCTAGTTGTGGGAGGACCGTTCACCGTCAGTTTCCGCTTCGTTTGAATTCTTGGAGTACCATTTTGACTCAGCTCTATGGGTCGACTCCGATCTGGCGTGCTGGAGAACAGAGAACTCGGTGTCCCGTCACCCTCTATTACAGGCTCCATTA
>DN88644_c0_g1_i1	len=239 path=[0:0-238]
ATGCAAATTTCTTCAACAAACACTCATTGCTATTGCAAATGTGGATTGATTCACTACGTGTCACATTGCAAGTGCACTGCAGTATTTTCCATTTCTCACATCTATGGATTTTCAGCATGAGCAATTATTGTCTACAATGCAGTACACTAATGCAAATTTTCTGGGATAAGTATGCATTTTTATTGTAGGAAAATTGGATCAGAGACAACTTTTCAGTATATAGGCGTGTTACAGTGTTA
>DN88667_c0_g1_i1	len=274 path=[0:0-273]
TAGTAATCTTCAGGCATATTCGCCACTAAAGTACAATACTTATAAGGTATGGCCAACTTACTATTCCATACCCATGGACCTATAAACCCCGAGAAGTCCAAAAGTCTCAAAATTATAAAAACACACTTAAAAAAGCATTAAAAATTTAAATATAAACTGCATTGCAAAATTTTCAAGAAATGAATTCTCTCTCCTGGTTTACTGAGCTTTTGTGCCGCTGAAATTCTCCTAAAATATTGAACAAAATGTATATTTCAGTGTGACTATGGGTGGG
>DN88610_c0_g1_i1	len=270 path=[0:0-269]
TGTCAAGCAAGTTTGGAACTTAGAAATAACAATTTACATGAACATATTCTTGCTTTATTTATTGAAGAAAGTTATGACATGATCAAGTTATAAAAAACTAGAAGCAAAAAAATGCCTCAAATTTCTGAAACAAAAAGCTCTGGTGAACCCCATGTGACATGACTAAAATTTTCCCGTTGAAAATGAAACTAAAGGCAAGCCATATCTGTAATCGTATATTTAGTTGTCACAAGTATGTCTCGCAGTTAAGTTCATGGATTTCAAGCTAAG
>DN88655_c0_g1_i1	len=607 path=[0:0-606]
GATGGCTGACTCATCAGTCGATGCAGACTCAGCCAAGTTGGATGCTGACTCGGCTGGATAGGCTGAGGCAGAGCTTATTCAAGCCAAGTCAGTGATCGAGTTGTATCGGTTTGGTCAATACTGGTCTGAATAAACCGAGTTGTTTTGACTCAGCCATATATGATAACAGTAATTCTTACTCGTAACATATTAGTATTGTTCATCATTTTAAATCTGTTAGGATATCTGTCTTCACTTGATGTTATGGCAGGACACAAAAGTGCATGAGAATATCATCGAATTGGCGTGTAAATTGAAATTTCTGTTAATCTTGTATCAGAAAACAATTGTAAAGAGGACACGGGCCTTTGAGAAGATATAATCGCAGATGCTGAAATTGGAGTTCAAGCCCTGCACCCA…
>DN88673_c0_g1_i1	len=235 path=[0:0-234]
TACTGAGAAAATATCTCAAACAGCCACTTCGAAAGGAAGAGTTTTTTTTACATGTTATACCTGGTGCTTGTTGACAACCTCATCAAGTTGTCAGGAAAATTGCAGAAAATCGTTATAGTGAAATGGAGAATCGAGCCATCAGATGGCAACAAGAGGTAGAATCAAATACGGAGTAGGCCCGTCTTTTGTGGGAAATATTTTTCTGTAATGGTTTATTGAAGCCTCCTTGTAGCAG
>DN88620_c0_g1_i1	len=260 path=[0:0-259]
AGGCCTTTGTTGCTCTAAAGCTGTCTCAGACATTCTTCAATCAAGCTTTAGTGACCAGGAAAGGCCTTCGCTTCTTTGAGACAGATTATTGACTAGTACAAAGAATTGTTTCCATGCTTGCTAGAAGAGACCTGAGTTGCTCCAAGATATGATGCTGTAATAGGACATATAAGAAAAGGAGACTAGCTAGGCTGGGATCATCTCCATCGAAGCTAATCAAGGGAAAAGGGGGTCTAAAAACCCTCAGAGCCACAACTCAA
>DN88628_c0_g1_i1	len=216 path=[0:0-215]
GACTGCAACATCTTGTTTGTCTAAAACTTTGGTCCTTTTGCAATTTGAACAATCATGTAAAAAGACCATTATGAGAGTGTGTTAGAGATAATGGTGATATTTAGATCTCAAACATATTAGGGCAGTCATATAATCAAGTCTCACTAATAAATCGATATATTATTGAAATGTTCAATGTAGTAATTAATGTGGTGGTTATTAGTTAGTTATTTGGGA
>DN88613_c0_g1_i1	len=315 path=[0:0-314]
ATCTTTATCTCGAAAGATCAGTTAACGTTTAAAGCTGGTGAAATCATTGGTAAGGTGGAATATCACTCTGCAGGTGAATCCTCCGGGCTCAATTGTTGGTGCAAAGTGCTAGTTGCAGATCACATCTTCATGGTAGAGTCGTGAGCCAAGGCATGCCCTGTTCTTCAGTAGATAATGTCCAAAATAATTCTTCTATGCTTTGGCCTCCTTTCAAAGAGCTTTAATCGTGGAAAGAATGGAAGTCAATCCAGTGTTACAGTCACTAGAGCCAGATATTGATGAAGTCAACTATATTGACCATCACCCGTGGCATCA
>DN88625_c0_g1_i1	len=346 path=[0:0-345]
TTTTAAAATCTCAACTAGCTCATACGTTAAAATGGTTCACTGTGATCTACTGTTTGATCTCTTTTTAATTAGTCTAATAAATCATTAATGGCTGCCCAGCTTCCAGAGTCCGAATCATTCAAGTGAGTTTTCCTAGATGCGTGAGTGCCAGAAAAAAGCTATAGCCACACCAAAGCTTTGAGCTCAGAAAAGGAAAATTATTTTTTATGTGGCAAATCATAAATGCTAATAAAAACATAAATTACTGGTGCAATTGGACATTCTCAGTATTTCTTATAGCTACATGTTATGAGTTAGTTTCGTTGTTCTGACTTCACTAATATGTTTTTTTCTGCAAACTTTTCGG
>DN88624_c0_g1_i1	len=271 path=[0:0-270]
AGAAGGGTCAGCAGGGTCAGGCACAGCAGAGAGAGAGTGTAGCCTCATTGGTTAGTTCCGCCTAATCAAGGGTTAGACCGGGTTACTACTCAAGGGGTTACTAACTATACCCCTCATTATGGGATGGCATTATCGGATGCAGGATGATCGGATCAGGATGGCATTATAAGTAAGCGGCAGTAGAGCAGGAGACTAGGAAGGACTATAGGAGGAGGGAGCAGGAGACTAGGAAGGACTATAGGAGGAGGGAGCAGGAGACTAGGAAGGACTA
>DN88604_c0_g1_i1	len=201 path=[0:0-200]
GTCTAGAACAAATAAATACATAGATTTTCATGGCCTAGCTAAGTGACATTTTCGATATCTATGATGCCCCCAAGATATATACCACCCTGTTCAATATAAAATGAGAGTTCACTGTGTGCTCTGTCCACACTTGAGATTATATGAAAAAATCAAAATGACTACCCTCAGAAGAAGATTGCTTTGCATCTACTTCATTTGACA
>DN88697_c0_g1_i1	len=288 path=[0:0-287]
ACAGTTTGAGGCCGAGTTCACTGATAAAGAGGGTCACGCTACCTTACTGAAGTTGGCCGTGTGCTTTCATACGTTCATGGCTGAGTTGACTGCTAAACAAGGGCAAAGTTTCATCTCTTTCTGGCTGTGTACCATCTCATTGTTGGCTGAGTGGTGTGCTTAAAGGAGACGAGTTCAATCATATATGCCTGTAGGATCTGCTGGAAGTAGTCACGGTGTTGTGTCTTGGTTTGTCACTCAAGTGCTGAAGAAGACCACGAGTTCCCTTGCCTGCTTGCTGAACGAGCG
>DN88669_c0_g1_i1	len=340 path=[0:0-339]
CCTCCATTTTCCGGTACCTTGAACACAGATGCATCCCTCCATTTTCCGGTACCCTGAACACAGATGCATCCCACTATTGGTGGGGGAAGGAAGAAGAACCAATGTAACGTGGAAACAAAAGTGGAGAAGGGGAAGCCTCAACAGGAATACTGGGGCAGGATTTCAAGTGGTGAGACTTTTAGGCAGAAAACCTTTACTACAAGCCTTAACATGAGATTCCTTTGACTGCTCAGAGATAGCAGGAGTAGACTGTTAATGAGAAGGTAAAGTGGTCAAGTGTGACATGTTATTGTTTTAAAAACATGAGATTCCTTTGAGTGACATGTTATTGTTTTAAAAA
>DN88681_c0_g1_i1	len=201 path=[0:0-200]
GGCACAAATAATAGAATCAATGCACTCAAGCTATAACCCCATTCATCACACTATGATCAAAATGAAATGCACAAAGATGCATTCGAGTTTTATGCAAGAAAGAACTAGAGTTCGAGACCAATGTTCTAACTGAACTAACGGGCAAACATTTAGGAGGGGACTTTAACAATTGAAAATAATTGATCTTTTGTATTCCATATA
>DN88657_c0_g1_i1	len=368 path=[0:0-367]
GGAGATACATTAAACTCAAGGTCAAGGTCACACGAACTAGCAAGATGCTTTCCACAAGACAACCACAAGATGTCCAGTCCAACCTCTTTCACTTGTCCACAAAACTCTGTAACGGAGGCCAAAATTTATACCTTCTTCTCCGACCGAAGATCATAGTCATACCACAGAAAAATCAGGGTTGATCACAGATTCATTCCACATGAACTCAGGGCAGGGCAAGAAACTTGGACTGTTACACAGAGATATCTTGGATTATATACGGAACTGTACCACAAGGAAGCTTGGACTATACCACTAAGATCTCGGACCATTCCACATAAGTGTATCGATCTAGCACCACAGAAATACCTCAGACAAAAGCTTGAATA
>DN88645_c0_g1_i1	len=212 path=[0:0-211]
GGGATAAAAACATAGAGCTGGGAACTTTGTGGAGGATGAAAATTTTCCAACTAGAGATTGGTCTTTCTTAGGAGCTCTATGGGCCATTTTGTTTTCTAAAGCACCATCAGGCAAATTAGAGGTTTCAACTCCCTATTTTAGTAACTGTTGCTCTCTGATATTGTCTACTTCTTTGTCTTCCACAACTCTTTTCTCCATTTTTGTTTCTAAAA
>DN88685_c0_g1_i1	len=328 path=[0:0-327]
GTTGGAGGCTGGGGTTTTAGAAAATAAGTCGGTTGTGGCGCCCAGGTTGCTGAAGAATATCTTTCGGGTGATATTTACCGCTGGTGCCTCTCAATTGGGTAGATGTGGCTGTGGGGTTGTGCTGTTGATCACTTTCAGATTCAATCTTTCTGGTCAGGTGGAGGGGGCACAAATACAAGAGCAAAGACACTTGCTTTATGGGGACTCTTATACATGGCTAAGAAATATAGTTTGGATCGGATTTCTATCTATGGAGACTCCAGAACTATTATTGATTGGGCTGGTGAAAACACAAAAATATCGTCCCCCAACTTGGTAAATTGCTTGG
>DN88601_c0_g1_i1	len=284 path=[0:0-283]
ACAGTCACTTTTGGAAAACCTTGTGGAAGCTTTTAAGCTATTAACTTCAGATCTTTACTGGATTTCATCCACAAATTGATTTCCAAACTGAGGTAGTAAACAGATCAGTGGTTCATACTCTCCACATGTACCACCAGTGGAACAAACATTGGGATCATTACTTGCATATTTTGCAGCACAACTGCAATAGAGCCAGTCATGTTCTACAGGACATTCCTATTTTGAGGTCTATTTTGCCCCTGAGATTCCAATTGCTTTTCTATCTCCAACATTTAACTAGTAGG
>DN88660_c0_g1_i1	len=213 path=[0:0-212]
GTTCTCACACCATATACCTGGGATATTAACCTATAATTCTAATCATCTACTTTTGTCCAGGGGACCAAAATCATTTTGTTTCAAGTACCTCTGATTCAGAACAACATCATCTGTGTCACATCACAGGGGGGTAGGTTCACCTTCCTGGTGAAAATGACGAGGAATAATGAGGACGAAAATAAACTCATTAGATGTAGATTTCTGTGGATTTTA
>DN88623_c0_g1_i1	len=250 path=[0:0-249]
GAAAATTGTATATATTCATACATACTATGAATAGGTTTGTGAGTCTTGACCATTTCTATATAAAAGAATTGTGGCTTAGGTGCTTATGTTTATATGTTTATGTGATTCTAGGCCAGCAAGTATATGTGCTAAAAGGCCAATAGCATAGCTACATAAATATGTAGTCAATCTTTTATATTAATAAAAATACATCATTGCTTCAATTAATTGAGAGAAGAGAGATGGTGGTCATGACTCATGAATGGTAAAG
>DN88696_c0_g1_i1	len=484 path=[0:0-483]
AGGCCAATAAAACTATCAAGAATTATGAGAAGGCCAATAAAACTGTCTAGGCCGATGTTTGAGGACATCCTATCATCTAGCTTCCTAGTTTCAAGGCCGATAAAGCAACCAAAGGTAAAGCTCCCCATCGTGCATGAAGCTTCTAAGGGAGTGGTTTTAATTCACAGTGGTGTGCACCTCAAAATAAGAGCTCAAGATGAGCCAGGTAACTAACTCTTTATGGAAATTTTCTGAAGGGACGAGCTAGAAATCTGGAGGGCAACAGCCTCCATGAAAAACAAGGACTCTCTCTAGGGCAGACTATTCAAAATTTCAAAGAATTTATGCTCTTCAAAGGACTCTCTCTAGGGGAGACTATAAAATATAAATTAATTTAAACAGCTCTCTTACTTATATAGC…
>DN88612_c0_g1_i1	len=206 path=[0:0-205]
AAAGCATCAAGTTGTTAGTTGTTGGAATTTATCAATGAGACGGAAAATATGGAGGAGGTGGATTATTTTGCAAATGAAATTCTTCAATTGTTATTTTTTTTTTTTGCTTTAATGTATGTTATGCGGTTCATTTTCTTCTATAAAACATGCAAATGTTCTTACTAATGCTGTAATGAATTTATTGATGTCCTCATACTTGAATAGCA
>DN88646_c0_g1_i1	len=212 path=[0:0-211]
TATTACTGTAAAAGAGGCGGTAGGTACTTACCAAATGTAATTGCTTCTTTCCTATAATGGGATTTTACTAAACCTTGTGAAATTGTCGCTAAACTAGTAGAGAATGGATCTAGCTAGAAAACAACGAACAAAACTTGCCAAGTAGGAAAGAGGAAAAAAATTTGAGAAAAATAAAATGAATGATTTCTATTCACACACAAAATAAATAAGAG
>DN88664_c0_g1_i1	len=264 path=[0:0-263]
TATAAAACCCTAGTAGCCCTTATTAATGCTTTCTGTGATGATGAGTAATGCCAAATAGCCTGCATGCCTCCTTCTTTGTTAGTGCACACTCTGTTCATGACAAAATGAACTGAATGACATGCCAAATGCCAAATGAATTTTACTCAAGCTCTTTTTTTTGAGTAGAAAGGGCAGTGAAAGAAATTTTTAAGCAAAACATCTTTATTCACCTCATTAGCTTTTCATTAAATTGGAATATTTGCACATGAGTTCAATTCATCATCG
>DN57025_c0_g1_i1	len=1265 path=[0:0-574 1:575-605 3:606-620 6:621-644 8:645-648 9:649-1264]
AGGCAAATATTTTCCTGGTTCCTTCACAACTTTCTATTTCCTTTTTGAGAAGAAACAAAAAAGTAATAAAATTCTATGTTGCATGGAAGTATATATGGTTTGATGGAGAACCTTGACCACTAACCCATTGTATTCCCATTGTATTCTTGATTAGACTAACCCAATTTTAAATCAATATAATCACATTGTAAACTTAATGTTGAAAATCTTTTAGTAATGGATGAATTAATGAAATATGTGATGGATTCTTTTCTCACATGGAGAGGTTTGGGCCATGTAAGGTATCATTTCCTCTAAGTACTTGTCACACATATAACAACTATCTCCCCCCTCTTATTATTTGTTATATCCTTAATTAATTTTAAATTTAATATTTCTAATATCACAATTGAGAAGGAT…
>DN57025_c0_g1_i2	len=1244 path=[0:0-574 2:575-595 5:596-599 6:600-623 8:624-627 9:628-1243]
AGGCAAATATTTTCCTGGTTCCTTCACAACTTTCTATTTCCTTTTTGAGAAGAAACAAAAAAGTAATAAAATTCTATGTTGCATGGAAGTATATATGGTTTGATGGAGAACCTTGACCACTAACCCATTGTATTCCCATTGTATTCTTGATTAGACTAACCCAATTTTAAATCAATATAATCACATTGTAAACTTAATGTTGAAAATCTTTTAGTAATGGATGAATTAATGAAATATGTGATGGATTCTTTTCTCACATGGAGAGGTTTGGGCCATGTAAGGTATCATTTCCTCTAAGTACTTGTCACACATATAACAACTATCTCCCCCCTCTTATTATTTGTTATATCCTTAATTAATTTTAAATTTAATATTTCTAATATCACAATTGAGAAGGAT…
>DN57025_c0_g1_i3	len=1265 path=[0:0-574 1:575-605 4:606-616 5:617-620 6:621-644 7:645-648 9:649-1264]
AGGCAAATATTTTCCTGGTTCCTTCACAACTTTCTATTTCCTTTTTGAGAAGAAACAAAAAAGTAATAAAATTCTATGTTGCATGGAAGTATATATGGTTTGATGGAGAACCTTGACCACTAACCCATTGTATTCCCATTGTATTCTTGATTAGACTAACCCAATTTTAAATCAATATAATCACATTGTAAACTTAATGTTGAAAATCTTTTAGTAATGGATGAATTAATGAAATATGTGATGGATTCTTTTCTCACATGGAGAGGTTTGGGCCATGTAAGGTATCATTTCCTCTAAGTACTTGTCACACATATAACAACTATCTCCCCCCTCTTATTATTTGTTATATCCTTAATTAATTTTAAATTTAATATTTCTAATATCACAATTGAGAAGGAT…
>DN57011_c6_g1_i5	len=249 path=[4:0-213 12:214-215 13:216-248]
TCTCCTCCTTTGCAGGTAAGCGGATAATAATCATAACATTTCTGTTTGTCTTCGCGTTCTTGCGAAGATTGCGAGACTTTAAGGGTTGAAATGAAAGAACGGAATCTTTTGTTTTATTTTAGGGGTTTGTAGGAGGAGTGAGTGTAATTTGTCCTTTGGGCTAGAAAATGAGGTTACGGGATTCGATTCCATGATCAATGGAGAAGATATGCGGGGTTTGTAATTTGGGTTGATATTTCGGTATTGTGG
>DN57014_c0_g1_i2	len=264 path=[0:0-32 4:33-48 5:49-49 7:50-75 8:76-77 11:78-78 12:79-82 14:83-83 15:84-89 16:90-94 18:95-101 19:102-102 21:103-117 23:118-118 24:119-142 26:143-143 27:144-144 28:145-145 30:146-149 31:150-150 33:151-157 34:158-198 36:199-210 39:211-263]
GAGCGCCTTTCTGAAAGACAAAAGAGCCTCTATGTCCCTTTGATCGCCAGTATCCATGGATGAAGATCTGAATTCAGACTGCTTCAGATTGCCTTCGTCTTCCTTTAAAACAAAATCATGGGGCCGAAAAGAAGCACTTCCACCCATATATAATAAACCATGTTGCCTGTGAATATGTGAGGAATAAGTAAGAGTCGCTGCAGGGACAGTAGTTAATGCGAGGATCACAAAGCACATAAACATCGTCATCGCCATAGTACCTTT
>DN57034_c0_g1_i1	len=1173 path=[0:0-1172]
TGATGTGTTACAAATCTGAATCTGCAAAATCAAATTAAATATAAAAAGGCGTATAACTGTAAAATATGACCTGAAGAAAACTCTAAATCCTGAAAGTTAATGAGTTCCAATTGAGTTTTGTATATGTTAAGAATCATCAACCAAATAAATTGGTTCTAGGAATCACCTTTATGAAAGGAATTTTAAATTGTTATGTACCATAGCTATCGGACTGGGCTTGGCAAAAAAAACTCACTGAGGCCAAAGTGTAGAGAGTTTGACTCGGCTGGCAAAAAAATATGGCAAGCACATAACTGACCAAAATGGCTCTTTGTAGGTATTTATAACTTTCTCAGCAAGTCTTTTGGAATCACCCACTAGTTGTGGCAAGTCGAACATTACATATCGATATAAACACAT…
>DN57092_c0_g1_i4	len=243 path=[1:0-108 7:109-150 8:151-186 10:187-240 11:241-242]
CGGTGTTAATCTGACTTGTGTTAAACATGCAAATTCAGATCGCAAGTAGTATTGTGGGCCAAATTCAACTAATCACAGATCCATCGCATATTATATGTCAGTGCCTGTAGAAACTTCCCCTAACTCAACAGCTTGTGGAAGTCAACACATTTTATTTGTTAAATCTACCTTCCGCTAACAGAAGATAATACAGGTCCTTCAGAACCTCTGATATAGATACTAAAACCCCAGTTGAGATTCTGA
>DN57005_c0_g1_i1	len=2301 path=[0:0-2300]
TCCTTAGTCAAAATAGCTAAGCAGACTGCCTGCTATCATTATGAAGAAATGGGCCATTTCATAGAAAATTGTCCCAAATTAATGTGGCATTCATTCACTGTGCGGACAATGCATGGCTTGCAGTCATAATCAGTTAATTCGTTAGCCAGGGATGCATTGCATGCCACTATAAAAAGCTGCATACCGTGTGTGATGAGAAGTGGAACACTACCCCACAATATACACTAGCAGTAAAAATTATCAAGTGTCCGGGGAGTCATGCGTTGTAACAAATCCCATTCCGAGTTGTTTAACCTGTCCTCAATGTTGAGTAAAAAGTTTGATGCACTGTGGGTCTTGGCTTCACAAATTTGATAATGCATTTGGTAGCATCATAACCTTCATTTGTCCCTGTGGTCA…
>DN57080_c1_g1_i1	len=936 path=[0:0-935]
AATCGTTAAGATAAATTTATATTTGTTGATTTTGTTATGGAATTTTATATTTATAAGATGGAAATGACTATGGTTTCTCCCTAACCAATTTCATAGGCCAAACCCTAGAACCTTAGTGTGACCCATTTACACTTGGCCAACTTTCCCCACTCAGGCACATTATCTAGGAGGTCAAAAATGGTAGCAACATTGGCTTCCTTGTCCCTAGCTAACTCTTTCTCCCTTTGGTGTTTCCAACACCCATATGGTAGACCCCCTTCAACTATAGTGAAAATGTTCTCACTTGGTGTTTCCAACATCCATATGGAAAGGCACTTACAATGATAGTCAAAATCTCCTCCCCTAGATCACTTGGATCTCGTGTGAAACCTTTTCTCGATTAGTCGATGAGGCTCTAGC…
>DN57080_c0_g1_i1	len=671 path=[0:0-670]
GCTTACATAATAAAGGTAGAAGTTTGTCCAAGATTTTTTTGGATTTGATGTAGTTTTTGATTTTCCTTAAGTCTTGATTTGTCATTATTTAAGGTTCTACTTGCTCTAGAGTCCCATCTTCTTTACACTGATTCACCCAATTTGCCTTAAACTATGTGGTGAAGTTGGAACTCTACTTCTTGATCCCAAATGGAAGGATAGGCAGATTCCTCATCTACCTAACCTTATGGCATTGAACCCTATTGTAATGGAAGGTCTTCTTTTGATGATGTGTTACTAATTTATCCTCTGAATCAACTTTTGGCACTTCCATAGATGGGTCCAACTAAAGTGGATCTTCCTTGTTAATCAATTGAAGTTCTTCCTTAGCTCTAACCCACCAAGTTGATTTAAGTTGAT…
>DN57044_c1_g1_i1	len=2399 path=[0:0-2398]
ACTTTTCTGTTGATTTCTTTTACATTTAGCACTACTAAGTTTTAGTTATATACTTCTTACACTCATTTCTTCTCTCTCAAATGCTCTACCAGTTATGATAAATTTCCATCCTTTTTCCCACTCTTTCATTAAGAAAAGTTCACATAATAAGCTAAGGTGCTTATGTCCTATTTGCAAGAGTTCAATTTGTCCCATACTTAAAAATAGCACTGAGATTTTATGAGGGACCTGATAATTTAGTTATCTAGATACCGGCTTATGTCAAGTGCAAACCCATTATTAGCTGGAGGTTTTTCTTTATGGTAGTTTTTTTTTATATCTTTTATGGTATCTTTAAACTGAACTCAATAATATTAAATGGATGCAGCAGTCTGCAGTCTATTAAATGGACTCAGATTT…
>DN57004_c3_g1_i1	len=236 path=[0:0-235]
GGGGGGTATTTAATAAAATAAAGCAAGAATATTAGTAAAGATTTTAACTATTAATATCTACGAGGAAAAGATAAAAAGAAAGAGTGACACAAATTAAAAAGAAGGAGAAAGTCAGGAAAAGGACCAAAAGAAAACCACAAAGCAAGAAGGGGAAACCCTAGGAGGAAGGAAAAGACAAGGCTCCAAGGGGAACAACAAAAGCTTGAAAAGGAAAAAAGGGGGGGGGGAAGGAAAAG
>DN57004_c2_g1_i1	len=327 path=[0:0-326]
AGGCCCATTACATGTCTAAAATCTGCCATCAACATAATATAAGGATGTCGAGTATGAGCATCATTATATTATATTAATCGCAGATTTTAGATATGGAGATTAGTTATTTCTAGTATAGAGGCTCTTTGTTGTATTCCCAGTGTCAAGGGGGAGATTTGATTTCTACCCCTCTCATATCTAATTCTGGACAGATTATATATACCTAAAAACTATCCGGGCATGATTTATTCAATTGAAAAAAAATACCCCATGATCCCCATATCAATAACTGCTTAAATACCCCATATCAATAACTGCTTAAATACCCCATATCAATAACTGCTTAAA
>DN57061_c1_g2_i1	len=459 path=[0:0-458]
TGTCAAGGCTTGGGCATGCAGCCTGCAAAAAACATAGACCAACATGGTCAACCCAACTGAAGCAGCAAAATATTCTAAAGCAAACTGGACGTTAAATATCTATGAACAAAATATGAAATAACAAATCCCCGGACAGAAACTTTGAACTTCAAGTCCTCTCCATTTCACCAAACAGAATTCAAACTAAAATATAACTGAAAAGGATTCTCATGACGAACATGTTTTATGTCTTCATTTCTGACACTAAAATCAAAATAGAAGACTCTATTTCCAAGTCATGGACCTACAATTTCTCTCTATAACGAAACGTGTTTTCACCAGTGACCAGGTTCAATTCCCATAAGAGCAACAGCAGCACCTGACATGTTTTCACCAGTGACTAGGTTCAATTCCCATAAG…
>DN57046_c2_g1_i1	len=313 path=[0:0-312]
AAAAGGGAGTCTACCAATGTGGAGTAAGTAATTTATTGTCTTTTTTTATGTGTTTATTTGTAATAAGGATTTTTGTATTAGTGCCAGAAATAATTATCTGGGTCCTAGAAAGTGTTAAATTTTCAGTGCACGGTACAGATATCGGCGCTTATAAACCTAAAACACTAGGAAACTGAAAACTTGAACTCCTCTCAATCAGCAATCTCTGATTACTAAATCTGTAATATGCAAACACTCAAAATGAAAACAGCAAACAGAAAGTTGAACTCTCAATCACATCTATGATCTGTTCAACTCTGAAAGAAGAAATACA
>DN57000_c1_g1_i1	len=284 path=[0:0-283]
GCCAAAACAAAACAAAAAAAAAGTGATGCCAAAAACAACCACTGTGAAGTCCATTATCGTAAAGCCATATCTCAAGTACATGACCATACAAATTTCTAGTTCTACGGAAACAAAAAAAAAACCACCAACAAGCAACACCCCTTGCTCTTCGATGTTGTGACACCCACTTACCTATGTTGTAGAAACAAAATGTGATATATATGATTTATTGATATGAGGTGTATTAGAAAATACTTCCCCGAAACAAGTTGGCAAAGACCTCGTGCACCACGATCTACTGGAGT
>DN57077_c3_g1_i1	len=409 path=[0:0-408]
GACGAGATTCATGGAGATAGGGCTGAAGAGCAGACATCATAGTATGAGAAACAATACATTAAAAGACAGAAAACATGCCAGCATATCAATAACTAAATATGTTGAAATGCTTACTTCAGAAGATGAAATCAATACAATTTGGCTAGCCAAAAGAGGATGAGAGAAAGTGCATTTGAACCAGTGTTGTGAAGGAGCAGGGATTCTGACACCTGGGAGTGGTCCTTCCCCAAAAAATCTAGGGAACGATGCCAACCCAGGAGCATTCTGTAGATATGATTACTAGAATGTGTGTGTGTGTGTGGTCCTAGGAGTGGTCTTGGGAGCAACCAGGAGAGAGAGACCCTCAAACAATCCAATGCAACACTGTTTTGAACAAACATGTTAGGTCTTTGAAAAACA…
>DN57015_c1_g1_i1	len=231 path=[0:0-230]
AGGCCATGCACATATGCAGTTCCTGCAAGTATACTCAGATTCAACTCTAACATGAAAATGCAAGAAAATCAAGCATTGCAAAAATTGAGTTTTAGCAGAGATTAGCCGTTCAAAAATATATTTTCCAGATTTCCGAGCATTGATTCAGAAACAACTTCAAAATACTGGGTACATTTTCCCTACAAATAAGAATGCTAATGATACAGACCTAGCCCAAGTTTGCCTTGCCTT
>DN57007_c3_g1_i1	len=249 path=[0:0-248]
CTTGTAGACCGTGCCGAAGTAGTTGTAAGTTTCTCTCTAGACATTTCTGAATAATCTCTCTTTTGTTTTTCAAAGGGGAGAGGGGGTTGAAATAAATCCTGCAAATGGTTGCTCTGCAGACTGTCCTACATGCTTGATTCAAAATGTCCATTTTAATGGTTCTGAAGATTGTCTCCATTCTTGATTCAAAATGTCCATTTTAATGGTTCTGAAGATTGTCTCCATTCTTGATTCAAAATGTCCATTTTA
>DN57042_c1_g1_i1	len=357 path=[0:0-356]
ACAATTTATTCTAATTTGGTAACTATGCTGTAAAGTACTTCTGTTAACTTTCTGTGTAACCGAATGCTCAACAGCTCTAACAATTAATGGAATAAACACCATTCACAGTTTCAATTTTTTTGAAGGTCCTGAAACTCATTTTTTGTGGGGCTAACATTCATGGGATTGTAACTGGCAAGGAGTACCTTAGGCTTTTAATTCTGTACATATTGAAAATTTTCTAAGTTCCTTGTTAGTAAAAGTATTATTTGAATTTCTCCAATTGAATTTGGATAGGAAAGGACAGAACTTATTTAAACAAAAATTAAAATTCTGAGATCTGGGTTGTTGCACAGATTTATGAAGCTGGAAGGCGAA
>DN57003_c1_g1_i1	len=278 path=[0:0-277]
ACAATGTCTGTTATTATTTTTATTAACATTATTATATATCATGTTTTTAATTGCATTGTTTGGGCTCCGTTAACATTTACAACCCAAGGGAATCTCCATTCAAGTGTGTTATAAATCTCCCAAGTTGGTTAAATGTCTGGTGTTATGAAGTCTTACTGTATTCTAATTCAAAATGTTCTAAGACAGAGTAACGTGTCCAAAATTGTTTATATTATTCAATACGTAGCTGACTTATTCACTAGCTTTACCTTGGCAGGCAGACTTTCTTGACAAGTATG
>DN57049_c3_g1_i1	len=205 path=[0:0-204]
GTGTACTATAAATTCAAATTACGAGGGAATGAACTTCAAAACCCAATTGTTTGAGTTAAATGACATTGTCGTATAATTTGTGTACTATAATATCAAATTACAAGGCAATGAACTTCAAAACCCACTTGTTTGAAATGATTTCTTCTTAAAAAAAACTCTAGCTTCTCGTTGATAGCTCACTAATCATCTGTGGCTGTCTAACTAA
>DN57021_c0_g1_i1	len=554 path=[0:0-553]
GCCTCTTAATTTTATTTCATATTCTCTCTCTCCTGATTTTAACATGGTAGGAGATTTTGACATAGTATATATTTTCTCTCCTTGATTTTAACCTGGTATCAAAGCCAGTGAAAGGCTTGGTCCTCGGCCTCTCCTGGGCCAAGGGAAATAAAATTTTTGTGAAACCTGGTATCAGAGCCAGTAAAGGCTTACTGGCTTGGTCCTCGGCCCCTCCTGGGCCAAGGGAAATAATTTTTTTTGTGAAAAGCGGTGGTTGTGGCGATTCACCCCTGAGATCTGCTTCAGCTGGAGAATTATGGACCGACCTGCCGGATGTAGAAAGAGCTACTGTGTAAGTTGTGAAGGGAGCCATCCTCCGAGATCGATGGAAGTGAGCGTGTTAGTGGCGAGATTGTTCTT…
>DN57089_c0_g1_i7	len=327 path=[1:0-152 3:153-153 5:154-238 6:239-271 8:272-274 9:275-326]
GATAATCATAATTTCCAAACAAAGTGACGCCTCTAGACAAGGTGAAATGGTTCTATGCTTTCTTATTGGAAACAAAAAGTTACAAAAATGTTCTAGGAGATGGAAATAATTGTAAGAACCATCAAAGATAGAGATATGTTAGACACAATTTACCTCAAATGTAAGCTCATTAAAGTTGGGTATGCATTAGTTTGCAATTCCATGGTGCGTGCATCTAGAAAACTACATATATCCCATAAAACCACTTCAAGGGCACAAAACCCAAAGGGAGACTCTGCATTGTAGCATGAGATGTAATTAGCGGTTTGGATTCAAAAATAAAATATG
>DN57089_c0_g1_i3	len=715 path=[2:0-447 11:448-449 12:450-450 13:451-513 14:514-514 16:515-714]
TATATCCCAATAAGATAGTGGCAACAAACTAACTCCAAACTCAACCTAAAAACATTATCTTCCAAATCTCTCCCTTAATGTTTACATATCATAAATATACATTGCCACACTAATATTAATTTGTATATCGCTGTTCTTCATCAAATATACATTACAACAACAATATTGATCTCCATCTGATTAATCTTCATCGACACTTTTAAACTATAACTATAAACACTTATATCTGTAACCCCTTATTATAACTCATTAAGACTATCACTATACCCCTAAATTCTACCCACCTACTTTGTTTACTGCTGCAGTCGACAGCATTATTGCATCCGAGGTTGCATTATATAGTTTAGCATGGGAAATATTTGAACAGGGATCGCATTTTATATTGTAGTTTCCGATTCT…
>DN57089_c0_g1_i8	len=710 path=[2:0-447 11:448-449 12:450-450 13:451-513 15:514-709]
TATATCCCAATAAGATAGTGGCAACAAACTAACTCCAAACTCAACCTAAAAACATTATCTTCCAAATCTCTCCCTTAATGTTTACATATCATAAATATACATTGCCACACTAATATTAATTTGTATATCGCTGTTCTTCATCAAATATACATTACAACAACAATATTGATCTCCATCTGATTAATCTTCATCGACACTTTTAAACTATAACTATAAACACTTATATCTGTAACCCCTTATTATAACTCATTAAGACTATCACTATACCCCTAAATTCTACCCACCTACTTTGTTTACTGCTGCAGTCGACAGCATTATTGCATCCGAGGTTGCATTATATAGTTTAGCATGGGAAATATTTGAACAGGGATCGCATTTTATATTGTAGTTTCCGATTCT…
>DN57008_c1_g1_i1	len=326 path=[0:0-325]
ATTGCTGCATTGTCTTTGTAAATGTGAGGAAGCATGGCTGTAAGATTTAATTTATGGTTCTATATTAGTATTGCTTTTTCTTATTTTTAGGAACTAGAATAATTTTTTGTCGTCCATATGTTGATCCTGCATTATCACGAGTCTACACTTAATCCTTTTTCCAAACTTTAAAGAAAATACAGAGCCAGAAAGCCCACCAATATAGCGTATTTATGTTGTCAGGTAGTGTTTGCATGCATACTCATGAGTCAGTATTACTATCTTTTAATTCTGACTATTGTACGTTTATTTACTTGCTGCAGGAATATTTTATGATAATTTCAAGA
>DN57038_c0_g1_i4	len=259 path=[1:0-48 13:49-98 14:99-106 15:107-112 16:113-113 18:114-158 19:159-163 20:164-207 22:208-214 23:215-239 24:240-258]
CATTCACCAAAATTCAATTCCAAATAAACTAACTATTATAATAAAGCTAAAAAACTAAATGCCCACCTACATAACTCCATTCTAAATGCCCATCTACATAACTCCATTCACCAAAATTCAATTCCAAATAAACTAACTATTATAATAAAGCTAAAAAACCAAGTTAAATGCCCACCTACATAACTCCATTCTAAATGCCCATCTACATGCCCCACCCAAATAACTCCATTCACTAGAATTCAATTCCAAGAAACATCTT
>DN57038_c0_g1_i1	len=618 path=[0:0-119 3:120-123 5:124-143 6:144-228 7:229-231 9:232-256 11:257-272 12:273-450 13:451-500 15:501-506 16:507-507 18:508-552 19:553-557 21:558-564 23:565-589 25:590-617]
GTAATAGTCTATTAACTAAAGTATTTCAGTTTTAATTATTATAATTTATTTTTACAATAATTTAATGTTAAATTTATAATTAATTTAGTTTTTAAATTTGTATATGATCTTTTTGTCAATAGGAAGGGGTTTTTTCCATATAAAGATTTGATTATTAAATTCTTTAATACTAAAAAGTTACAAGTTTTTCAGGGTAAATTGTTGGGAGAGCTTAGCTTTGAAATCATAGGTATTTGAGGTAGTGGTAGAATGTATAGCTGTAGTAAAAAAAAGTTATATTAGTAGTTTTGTGATCTATATATACACAATTAGATGAAAACCCACCTCATATCCTATATAAGTAATCTAATGTTAGATGGATAATTCAAGTATTTGAAAATACACTTTATACTCCCCTTC…
>DN57038_c0_g1_i2	len=508 path=[2:0-26 5:27-46 6:47-131 7:132-134 9:135-159 11:160-175 12:176-353 13:354-403 14:404-411 15:412-417 17:418-418 18:419-463 20:464-507]
TTTGTATATGATATTTTTGTCAATAGGAGGGGTTTTTTCCATATAAAGATTTGATTATTAAATTCTTTAATACTAAAAAGTTACAAGTTTTTCAGGGTAAATTGTTGGGAGAGCTTAGCTTTGAAATCATAGGTATTTGAGGTAGTGGTAGAATGTATAGCTGTAGTAAAAAAAAGTTATATTAGTAGTTTTGTGATCTATATATACACAATTAGATGAAAACCCACCTCATATCCTATATAAGTAATCTAATGTTAGATGGATAATTCAAGTATTTGAAAATACACTTTATACTCCCCTTCACTGGAATTCAATTCCAAAAAATATCTTTAAATAACTATTATAATAAAGCTGAAAAACTAAATGCCCACCTACATAACTCCATTCTAAATGCCCATC…
>DN57038_c0_g1_i3	len=606 path=[0:0-119 4:120-129 6:130-214 8:215-218 9:219-243 10:244-260 12:261-438 13:439-488 15:489-494 16:495-495 18:496-540 19:541-545 21:546-552 23:553-577 25:578-605]
GTAATAGTCTATTAACTAAAGTATTTCAGTTTTAATTATTATAATTTATTTTTACAATAATTTAATGTTAAATTTATAATTAATTTAGTTTTTAAATTTGTATATGATCTTTTTGTCAATCTGAAGGGGTGATTTGATTATTAAATTCTTTAATACTAAAAAGTTACAAGTTTTTCAGGGTAAATTGTTGGGAGAGCTTAGCTTTGAAATCATAGCTATTTTGAGGTAGTGGTAGAATGTATAGTTGTAGTAAAAAAAAAATTATATTAGTAGTTTTGTGATCTATATATACACAATTAGATGAAAACCCACCTCATATCCTATATAAGTAATCTAATGTTAGATGGATAATTCAAGTATTTGAAAATACACTTTATACTCCCCTTCACTGGAATTCAA…
>DN57052_c1_g1_i1	len=524 path=[0:0-523]
GTTGCTCCTTGACAATCAACAAGCAAAGCCAAATAAAGCTCCTGGCATTTGCCTCCAAGAGCCTAACCAAACGCTTCAAATACAAACTCAGACGGCGTAAAGTTTCACCTAAGTCAATAAGGTCAAGAAGATAGCTTAAATAAACACTGAAACCCAACTAAAACACCCAGAGTCTGCCTCTGATCAAAGGCTTAATCTAAAACAATCGGTATAAAAGCACAAATATATGTCACCGAAACTGCACGTGACAACAACGAATAATATCCGCAATTCCAAAAAAGAAAATATCATAGACACGACCTTCATCATGAAATAAGTCCAGGTTTGAACGCCTAAACCGGGTGAACAAAAAATTAATTATAAAAAAGCATCAATGCTTACAAATCCCGAAGTGGAAGA…
>DN57052_c0_g1_i1	len=326 path=[0:0-325]
GTTGCATTCAAAATCGTAAACTAGATTGAATCCAAATCAGAGAGCAAAAAAGCATACATGTAGAGAGAGACCAATCTAATGCAATAAAATCAAGAAAAAGAAGAAATTTAAATAAAAAACTGATTAATAACCAAGTCCTGATTACAGGGCCTACACTTCTATTTCCCGAGAGGAACAAACATTTTTTTAAACAACAATTTGGATGAAAATATAACTAATTGCGAGCCAGGCTCAGAATGCCTAAGTTTTCACCGCCGCCAATAGACAAACCACAAAATTAAAAGAAAAGCTTAAATACTGACCAAAGCCAAATAAAGCTCCTGGCA
>DN59539_c3_g1_i1	len=203 path=[0:0-202]
GAGCATGCAGTCCAGTACTACCAGGTGCACGTTCCAGCTTGCTTCGCTTTACCATATCTGTCAAAAGTTCAAGAGCCCATCTCAAAATGCATTCCGTCATTCATCCAAATAACAATGAAAGGCTAGCAAAATTTTGCCGTTGTGGCATTTAAAGTTGACTGTCTCTGCTGTTGTTCTTGCAGAAGAAAGCATGCAATTAAATA
>DN59539_c0_g1_i1	len=343 path=[0:0-342]
TTAGCCTACGCTTTTTCACAACAGGTATCGATACCCTTCATGACTTTTTATGAAAGGTTTCTACAAAATTTTTGTTACAAAAGAAAATACATTTGCATAAAATATTATGGTTTGCATCAGAGCTGCTCCCCTATAACTAAGGACATCTTTAAGCTTCAACTAATAATAGGTCAGCAATTTTGTGTTGCAGTTTCTAAATGACAATAAATATACAGATATGAATTTTGCAGCATTTCCTGTGACCTTATGTTTAGTTTTGCATCTTGTCAGCCTGTACCTTGACTGATAAGAATTTTTGCTAACGTTTTATGTGATTTAAAGTTAAGAGTTTGTACGCATAGGA
>DN59503_c2_g1_i1	len=1110 path=[0:0-1109]
TGGTCTTTAGATTTAATATGTCTTTCTAGTTTGGCATTGATAATTGCCTGCTTGTCAATTTGAGTTAGATGTTTGCGTTTTGCTCTAGTTAGAGTGGATTGCATGCATTTAGGTTATTAGACTCCGTCCTCTAATCAATATCAGCAAATTACTAGCTAAAATCATTAGTTAGTTGTAATCCGACAAAAAATGACTGGCTTAAGCCATTTTGGTGTCATGACAAAAATGTAAAGCTATTAGTCCTATCTGAGATATGAATGGGTAAATAACCCGTCGTCAATTGGAAATGTTCCAAGCATCTTACTTTTCAACCTGGAAGTTATTCCTTTCGGAATGGCTTCAGTTTGCAGCCTGTTCGCCCTCTTCTCGAGGGTTGTACCGTATATATCAAATTGAAGA…
>DN59503_c5_g1_i1	len=206 path=[0:0-205]
CTTTATCTGTGTCTCAACTTGCTGTTACAAGCATATGGCACTAGCATGAGCAACCATCAATTTTCTTTATTGTTGCAAATCAAAGTCCATGACTTAGTTCGCAAGCATAGCAGGCTTTTGGTTTGAAGAAAGAATCCACAAATATAGCTGTTCTTACTTGCTAGATTAGATGAGACGCGTACCTGAATTTCACTTCTCATTTCTGG
>DN59572_c0_g1_i1	len=285 path=[0:0-284]
GAGATGAAATGGCATGCAGAAAAGGCCAAAACTCGACAAAACAGTGCATCTAACAACATGGGAAGAAAGCTCCAAGCGATTTTACCATTCAAAACACTTTAGCAGCATTAATAAAATTTTCTACAGACAAACCACCAATCTAGGCATTAAGAAGACGAATCCTCATATAGTTTTGGACAAAAGAGCAGAGACAAACAGAGATCCAATAAGATTAAGGATTCAAGAAAGAAATCTTGGCTTACAAACTTTATGACCAAGGTTTATAAAGAAAATTTATCTACGCTC
>DN59571_c0_g1_i1	len=870 path=[0:0-869]
TCCCACAGTATTTGCTTGGCCCTGAAAAAGGAAAAAAATTATAAAATATGTCTATCAACAAGAACGGAAAACAACCATAATTCAAGTGTAAAGTAAAAAAAATTGCAAGGCAAATGAGAATGTAAATTCTCAAAATACTTGGGGCTCAATGAAGAAAAGAGGTATGTCTTCCCATTGGCCAATGTTGGTACTTGTGAATCCATCTTTCATGCAAAAAGTAGAGCAATAATAATCTTAAAGGAGTCCATTAGAAAACAAAATAATTCTAAAATTAGAACCTTAACTTTCAAGACTGAAACTGAGATTATTTTTTGTAACAACCTAAACGTGAACTACCTAAATATATTTTTAATCACCAAGATTTCTTCCTAGTCCATTTATGATCATTTTATCACCTAA…
>DN59585_c0_g1_i1	len=1037 path=[0:0-1036]
TACGGTCCCATTTCTTTCTGGGACTGCATGCTCAAATGACTACATAAGTTAATACTCCTTTTCAAGTTAACTCCGTATGATGTAAAAGTACTTGCTTTATCTAACGATAACGCATTTACTTACAGATGGTAACGTAAGATTGAGAAACAAACTAGAGAAATCTCAATCCAAGTCAGTGTCAGTTCAGTTACACTATTTCCCTATTATGATGAATTTCAAACTAGTATTGGGACATAAAATGATGAGTTATAGCTCAATTACCTTGATCTAAATAGAGCAAGTACACCATGACCATAATCATCTCACTTATACAATTAGTCTAAGCTAATTAGTTATCCAGTGATGCAAATGCCAAATACCAAAGAAGAATGCAAGTGCCAAATGGTAAAAGAAGACTGT…
>DN59544_c1_g1_i1	len=254 path=[0:0-253]
AGAAACTGACGAAGAAGACAAGTATGGCCAAGATAAGGAGTGTGAGGAATTTTGATGGGGAAGATCGCAGCAAACACAATCCACCCATGGTTGGGTGTTCGATATTTCTGTTTTGCTTTGTTCTGTATTGGTTGATATTTATGTAGGTAGGAATCTAAGAGTTTTTTTGCTTTGTTATGTATTGGTTGATATTTATGTAGGTAGGAATCTAAGAGTTTTTTTGCTTTGTTATGTATTGGTTGATATTTATGTAG
>DN59549_c0_g1_i1	len=336 path=[0:0-335]
ACACAATAAATATTGTTATGGAGGTGAGCTAAACTGTTTGAACTTGGAGATACATTTATTTTCATAATTATATACTTACGAAAGCTCAATCAAGCAATTTCTTCTTTAGTCAATAATTATGATCAACAGGGGTCTTTATTAACTAATGCGTAGTCAATTTTGCTTTGGTTCCCTTATGTGTACAGGCACCTTGGTGTAGTGCTTGTATTCAACACTACATATTATGTCTTTGAACCTTAGCTGTTCCTTTCCTGAGTAGAGTAGCATATTATTAAGTAGAACCGAGTATTTTATGGAGTTATGTTTATGTGCAGGAAATGAAGATGCTGTCTGAAA
>DN59512_c2_g1_i1	len=221 path=[0:0-220]
TAGAAATGAAAAATCAAATTGATCCATTACAATTTAAAAACTTAAAAAGGGATTAGAGTAATTACAAAATTTTACAATGAAGTAGTTTGATTTTGATCCCTCGTTCCTTTAAACATATTACTATTTTTTCCAGGTTAAAATGATTCTATAGTAATAACATAATTTCTAATGTAAAAAGGAATAAAACTTCATATTACCAGGCTTGCATGACTGATTCGAGA
>DN59517_c5_g1_i1	len=579 path=[0:0-578]
ATGGCAAATTGTTCAACCCTACAGCCTATGCTATGCAATTCTTCAAAACCATTGAAATTTTTCATTATAGGTATAGTCCTTGCAACTAAAAACACAATCAATTTCTTTTGCACTAATTGTTATGGTGTCCTAAAACCATCCGCCTAGGGAAAGATACACCTCAAGCTCCAGACCAATAAAACAAAACAAATTAACTCTTTTGGGTGCATACAACAATCATGATGTTTGATGATCCCAGCAAGTAAACAAACTTTGCATGGCAGATGTCTTTAACATATCCACAACTCATAGAGGATAAAAGAGTGCCCAATGCTGAATTTAGTAACAAAGATGGATCAAGTCTAGAACATCAGAATTACTCTTTTGAGCATTGAGAGGATCCACTTCAAGAAAATGAGT…
>DN59517_c3_g1_i6	len=213 path=[0:0-47 2:48-113 4:114-212]
GGCCACTCGGTTTTTTAATATAGCACGATGAATAGTGTGCTTTTATGTCGGTACAATGTTAATGTTACACTTTTGCATGCAGGGCAATGTTAGAATCTGGAAATCTGTCTAACAGAGCAAAGCGAATTGGAGGAAAACAGTAGGCTACTCGGTTTTTTAATATAGCACGATGAATAGTGTGCTTTTATGTCGGTACAATGTTAATGTTACACT
>DN59517_c4_g2_i1	len=216 path=[0:0-32 2:33-215]
GGGCACTATTAATTAAATTTTTAATCTGTGTGTCAAATGAACCCCAAAGAATCAGTGGTGTCCTTACTATGATCCAACAAACCAGATCCTTTCAAGTTGAACCTATAAATACATTATTTATTTATGAACAGATAGCATAACTTCAGGCTCCAGGTACATTCAGAATAATAATAAAAATGCACAAAGTATATTTAGTTTTAGTTCAGCTCAAAGCCT
>DN59517_c4_g2_i2	len=418 path=[1:0-234 2:235-417]
GGACGAAGTGAGGCCAACTCAGCAAGTGACGAACTACAAACTTACAAAGCCCTTTCATTTCATTGATGAAGCATTACACGTATAAGATGTTCCCATTACTTTCAACCACATACTTCAGAACTGTTGTAAATAAAACCCCTCTAAATTCATGGCTAAGAACCCTGGACTGGCATCATTATATGATAAAATTAGCAATAAGAAGGGTGACCATTACTTAAATTTTTAATATCTCTGCCAAATGAACCCCAAAGAATCAGTGGTGTCCTTACTATGATCCAACAAACCAGATCCTTTCAAGTTGAACCTATAAATACATTATTTATTTATGAACAGATAGCATAACTTCAGGCTCCAGGTACATTCAGAATAATAATAAAAATGCACAAAGTATATTTAGTT…
>DN59517_c2_g1_i2	len=362 path=[0:0-153 1:154-361]
TAGCTTTACTGAATTGAATGGACAGAGGTGAAATTTAAATAACAGGCTTTGAGGAAATGCTCCCATTATGGGTTTAAATAATTTAGTATACCTTTTTTCCAGGGAAATCCTTGCAGGGAAACCCGAGGGATATGCTTGGAAAACCCATTGGTGGACTGTAGGGTTGAACAATTTGCCATATCTCCTTCCTATATAATTGTGGACATGGTAGCTTTACTGAATTGAATGGACAGAGGTGAAATTTAAATAACAGGCTTTGAGGAAATGCTCCCATTATGGGTTTAAATAATTTAGTATACCTTTTTTCCAGGGAAATCCTTGCAGGGAAACCCGAGGGATATGCTTGGAAAACCCATTGGTGG
>DN59591_c1_g1_i1	len=292 path=[0:0-291]
TAATTATTGCAACTGGTGCTCGGGTATGAACTTTCTTTGAAATGGAAGCCTCTTTTTCCCTGAGGGTTTGGACTTTCCCTTGATCCTTTATGTACATCCATCTTTTCTTACATACACGCAAGTAAATGTGAAAGACAGCTAAAACACATGCTTGTTTGTCTTCTGGTGCTGCTTATTATTGACTACAAAAATGTGCGTGTACTGAATTCTCTGGTTGCTTCCCAAGCACGCTTACTGACATTTCTCTGTTGATTTATGTACTTGTAAAGGCGTTCAAGCTTGAGGAGTTTGG
>DN59541_c2_g2_i3	len=370 path=[0:0-35 7:36-369]
GAAAACAATTAGGCTCACCTTCATTCACACTTAACAATGAGCTCTCCAGGGTCAAAGCCTTTGGTTCCTAATTTCAAAGAATACCAACAGACGTGTCTACAAATGATACCCATGCTTTCAGAAATTTGTGATCAGAGGTGAACAGCCACCCATTAACCTTTAGACCAAACTCCTAGTGATTGTAATATAAGATAAAGGTGACTCAGAAATTTGTGATCAGAGGTGAACAGCTACCCATTAACCTTTAGACCAAACTCCTAGTGATTGTAATATAAGATAAAGGTGACTCAGAAATTTGTGATCAGAGGTGAACAGCCGCCCATTAACCTTTAGACCAAACTCCTAGTGATTGTAATATAAGATAAAGGTG
>DN59556_c4_g1_i1	len=206 path=[0:0-205]
AATCTTGGAGGGTTTACTATTGTGGTAATCTCCTGAACATAGTTCTTGGGCTTTTAGACACAGGTTTTGCATGTTAAGTTTTGTGTTTTAGTTTTGTATATTGATTTTGTGAGGACGAATTACAATGTTGACGATACTCGCAAGACATTTTCATATTGTATTGGAAAATTTTGTTGCATGTAGCTGGATCTGCTGACTCTGAAGCA
>DN59556_c0_g1_i1	len=229 path=[0:0-228]
ATGCACGATAAATCTCCCACTAACGATTAAGGAAAATTCAAGAATACTGAGAAACGTATTCACTTAGTAAGACAGATTCAAGTGAATGCTCTTCCATTAAATTAGAAACAAAAATCCATACCTGATGTTCTTAGAAGCTGGATATGTAATGAACCCAAATATTAATGCTTTCCACCTGTATTATGCTCCATGCAACCACATCCTAAAAAGCTCCCAAGTTCCCCTCCCA
>DN59568_c3_g2_i1	len=211 path=[0:0-210]
TTATCTTTCATAAATGCACTTTGTTGTAAAGTTTTTTTGGTTTAATATCATTCTTATCTTCTGACCTTTCAAAAATATATTATTCACTGAACTTTCCCTGAACCTTAGGGGGCTGGGGCAATAGCCATTCTACTTGAATATAAGACTAACCCAGGTAGACCTTTTACTTGCATATCTAAGCCTAACCTAGGTAAATCCAAAAAAGTCAACC
>DN59516_c0_g1_i1	len=1034 path=[1:0-116 4:117-454 5:455-1033]
AAGGCATACCTGTCTTGTCAGCAAAGTTATCAACTTCTATCAATGAAGAATGCTGTGAATTATTTGTACTTAATATATTCAGGGATTTTCTTCATGGTGTTAAATGAGTAGTCCAGGGGTCATGCTTTGCAGGCTGTTTGTGCCTTTCGGTTCCACCCCTGGATCCTTTCGATGAATGGCTATATGCAGGGATGAATCAACCCACATCATTGTTATAGTTTCTTATGTAGTTTTCTTATATTTCAACGGATTTTGGAAAGCGATCTAACAACTTTAAGATTTTCTTTTTCATTCTTTTTTCAAACATACTTTGAATGGATAATGGCTTGCCCCCGATTAAGGGACCTATGATGTATCATAATGCGTAATGCTATTAGCATTTTTTATTTGCTCAATAAA…
>DN59561_c1_g1_i4	len=557 path=[0:0-432 1:433-442 3:443-443 5:444-556]
TTTTTTTTTTGGAAAATGTTGCTATTGGAAGTTGTATTGAATTTGCTATGTAGTACAAAGAACATCACAGGAAAAAAAATAGTTATTTGAAGTTGAAGAAATTTCTAAGGCAAACCAACATTATTCAAACCCGGAGGTAGTCCATATACAACTATACAACTACTATTTAGGGATAATCCACCTCCTTAGTGAATCTTCGCACAAACAAATACTCTGGTATTCATGAAAATAACTTAAGTCGCAAGCTGTGTAGAATATTCGCAGAGTTGACTTCCAAAATTTTTGCTTCTTGTGTTTTACGAGCTTTGCAACCAAAGTTTGAAGAGAATTCAGAGCTTCATAATTAGTTATATGGCTTCTTCTTTCCCGTTCATTTGCACTTCAATTGCTGGGCCCACG…
>DN59561_c1_g1_i1	len=465 path=[0:0-432 1:433-442 2:443-464]
TTTTTTTTTTGGAAAATGTTGCTATTGGAAGTTGTATTGAATTTGCTATGTAGTACAAAGAACATCACAGGAAAAAAAATAGTTATTTGAAGTTGAAGAAATTTCTAAGGCAAACCAACATTATTCAAACCCGGAGGTAGTCCATATACAACTATACAACTACTATTTAGGGATAATCCACCTCCTTAGTGAATCTTCGCACAAACAAATACTCTGGTATTCATGAAAATAACTTAAGTCGCAAGCTGTGTAGAATATTCGCAGAGTTGACTTCCAAAATTTTTGCTTCTTGTGTTTTACGAGCTTTGCAACCAAAGTTTGAAGAGAATTCAGAGCTTCATAATTAGTTATATGGCTTCTTCTTTCCCGTTCATTTGCACTTCAATTGCTGGGCCCACG…
>DN59561_c1_g1_i3	len=609 path=[0:0-432 4:433-608]
TTTTTTTTTTGGAAAATGTTGCTATTGGAAGTTGTATTGAATTTGCTATGTAGTACAAAGAACATCACAGGAAAAAAAATAGTTATTTGAAGTTGAAGAAATTTCTAAGGCAAACCAACATTATTCAAACCCGGAGGTAGTCCATATACAACTATACAACTACTATTTAGGGATAATCCACCTCCTTAGTGAATCTTCGCACAAACAAATACTCTGGTATTCATGAAAATAACTTAAGTCGCAAGCTGTGTAGAATATTCGCAGAGTTGACTTCCAAAATTTTTGCTTCTTGTGTTTTACGAGCTTTGCAACCAAAGTTTGAAGAGAATTCAGAGCTTCATAATTAGTTATATGGCTTCTTCTTTCCCGTTCATTTGCACTTCAATTGCTGGGCCCACG…
>DN59561_c1_g1_i2	len=620 path=[0:0-432 1:433-442 3:443-443 4:444-619]
TTTTTTTTTTGGAAAATGTTGCTATTGGAAGTTGTATTGAATTTGCTATGTAGTACAAAGAACATCACAGGAAAAAAAATAGTTATTTGAAGTTGAAGAAATTTCTAAGGCAAACCAACATTATTCAAACCCGGAGGTAGTCCATATACAACTATACAACTACTATTTAGGGATAATCCACCTCCTTAGTGAATCTTCGCACAAACAAATACTCTGGTATTCATGAAAATAACTTAAGTCGCAAGCTGTGTAGAATATTCGCAGAGTTGACTTCCAAAATTTTTGCTTCTTGTGTTTTACGAGCTTTGCAACCAAAGTTTGAAGAGAATTCAGAGCTTCATAATTAGTTATATGGCTTCTTCTTTCCCGTTCATTTGCACTTCAATTGCTGGGCCCACG…
>DN59555_c3_g1_i1	len=227 path=[0:0-226]
TCATATATATTTTCTCAATCTCCTGGCATTAGTGAAGGTATACCTCGTATGTTGGGTTTGCTATTCCAATATGGATTACGAGCTTCTCAATCTGTTGGCATCATGTGCTTGCGCAGTTGTATTTATATTATTGCTTTTATGGGATGTGATTATGGCGTTCAAAAGGAAGGCACTGTGGATTCCTGCAGAAGCTCTGGTTCTGAGCGCCCTTACCATCCAGCTTTTAG
>DN59555_c1_g1_i1	len=2099 path=[1:0-110 2:111-160 4:161-162 5:163-801 7:802-876 8:877-918 9:919-974 11:975-1031 12:1032-1059 14:1060-1502 15:1503-1522 17:1523-1551 18:1552-1574 20:1575-1599 22:1600-1735 23:1736-2098]
GCCATCACGATTTTATTTTTATTATAAATATAAAAATTTGTTTTATAACATAAAAATAAATAAAAATATATTTCATAAATGCATATAGCTCAAATCCAAATAAGTTAAGATACTCGAATCTCAAATATAACTAGAAAACCTAATAAATGAACTCTGCGCACGCCCTTAAAAAGGTAAATTATTGACTCTACTCACGCTCCATAAGCGTCTGACGGCCATTATCCCCTCCAGATAGCAACTCTAAACTTGAACTTGGACGTTGGCTGCGCCGATCTACATGACAAATGACGTTGCCTTCGCGGATCTCATCACGTGCTCCCTCAGATTCCCCGTTCATCTTTGCCTGCTCACGCACACCCTTGAGTTTTCCTGCTATGAAAACTGCGTTCTGTATCTTTG…
>DN59555_c1_g1_i2	len=2096 path=[1:0-110 2:111-160 4:161-162 5:163-801 6:802-873 8:874-915 10:916-971 11:972-1028 13:1029-1056 14:1057-1499 15:1500-1519 17:1520-1548 18:1549-1571 20:1572-1596 22:1597-1732 23:1733-2095]
GCCATCACGATTTTATTTTTATTATAAATATAAAAATTTGTTTTATAACATAAAAATAAATAAAAATATATTTCATAAATGCATATAGCTCAAATCCAAATAAGTTAAGATACTCGAATCTCAAATATAACTAGAAAACCTAATAAATGAACTCTGCGCACGCCCTTAAAAAGGTAAATTATTGACTCTACTCACGCTCCATAAGCGTCTGACGGCCATTATCCCCTCCAGATAGCAACTCTAAACTTGAACTTGGACGTTGGCTGCGCCGATCTACATGACAAATGACGTTGCCTTCGCGGATCTCATCACGTGCTCCCTCAGATTCCCCGTTCATCTTTGCCTGCTCACGCACACCCTTGAGTTTTCCTGCTATGAAAACTGCGTTCTGTATCTTTG…
>DN59555_c2_g1_i1	len=606 path=[0:0-605]
TATTTCTTATATTGCTTTTACAGGATGTGATTATGGCGTTGAAGAGAAAGGCACTGTGGATTCCTGCAGAAACTCCCGCTCTGAGCGCCTTGACTATCCAGCTTATCAATTTTATTGATTATTCCCATGTAACTTTTATGGGCAAGCGATCCGAAACACAAAAGGAAGTAGAGGATATGCTGGGAGCAAATCAGTTGGTAATTGATTCCGCGAGGCTTATGATGTGTGTCTTCCTTAGCTATCTGGTTCCCCAAATGGTCCGTTATCGCTGGAAAAATGTGTGGACTGATATTGGAGCATTGGTATTGGCCGTAATGTTCCATTTGGGCGTTGAGCTTTACTTTGTTTGGAAAATAAAGTTTCTTCCCCAAACATCCGAGCATTCCCGATCAAAATGGT…
>DN59555_c0_g1_i1	len=325 path=[0:0-324]
ACATGGAGGATTTTTGGACAAGGAGTATTGCTGAAATGAAAGAGGATCTGGATACACAGTCCGAAAGCCAACTGTATATGAAGAAAAGAATCAGTGAATTAAAGCTAGTAGAGAAATTTATGGTCATTTTAGTCACAACATTTCGGCTACAATCTTTCTCACTGCCAATGCGGATTTGGCTGCAGAAAGTCACGGTCTACCTCAGCAAGGTCTGTTGGTCACTTTCTGAGTTTGCAGTGGGAATGCTCAGGCCTCTCAGAATGAGCCGCGAAAAGAATGCTTTGTTGTCTGGATTGGACACATCAGGAACAACAAGAGGCGACCA
>DN59534_c3_g1_i1	len=269 path=[0:0-268]
TACCTGAAAAAGCCTACCACAGGTCAATCAACTTATCCTTAAAGTTGCTGAAGGTGGTTTTGATTTAAAACATGCTAATAGAGAAATATTAAGGGCAGCTTAGGAACAATAAGAATTGGTTTTATGGTTTTGATGTGATGCAAATCAGAAGGCTAGGAACAATTTTTTTGTTTCAATTTCTTTCCAACACGAGATGATATTCATGTTTAGAATCTAAACTGACACATATATTACATTCTATTGATCAGGTATTTGTTTGAAATGCTGAA
>DN59534_c0_g1_i1	len=572 path=[0:0-571]
AATTCTTTATCATCCATCTCACCCTGGAACAAATATACCCAAACAAAATAAATACAACGCACTTTGCAATTCAAATTGTATCCAAACACCACTGAAATGTTGAGGAAAATAAAAATCTCTCTAAAACAGCATGTTCTGCATTTACTCGGTCTTCAGAGTGCAATATAAGATGGTCTCAAACTTGTTACTAAGGAGGTTGAGCAATTAGTATTTTGTACTTTGCACTTGCTTGATTCACAAGAGAAGACACCAGATAGAAAACTGTTGAAGGCCAGAAAATTGGTCTGTTGGGAAAACTAAGGCAACTAGCTTCTTGGATAATCAAGCAAAACCCTATAAGCTGTGTACCAGAAAGGCATAAACAGTACTGAAAGAACTAATAGAAGATGAAAATGAAAT…
>DN18790_c0_g1_i1	len=339 path=[0:0-338]
ATCCTGTCATCATTTCCGTCTATCGGCTTCGGCCTTGTACAGTCGAGATCGTTCTGATCCAAAAACAATTAACAACCTTATTTCCCGTCAGTTAACAGGCAGTGTCAGGGCATTAATTTATATCGGTCCGTATCACACACACCAACAACAATATCGACAGATCAATATGATATCGGGATCGCTCCCATCGGGTTCCATCTGGTTTTGATACACCCTATTGATTTCGATATACTATAGCGACTTCCAAGAAACATAGCAGGTTCCAATACGTCTGATCCAAAACTCTGTTGTGAGTTTCTGTTATGTGTCGACGACTTAAAAGATTCTGTCAACAGCGGG
>DN18716_c0_g1_i1	len=231 path=[0:0-230]
GGGAGAAGATGTTGCGTGAGGAAGCCAAGCGCTTCTCTTGCTGCTAGGGTTCATTCTAGTCGCTGCTGACCTCCGATGCTCTTGACCCATCTAGTCGTCGAGATGCTTTGCAGCTCTGCCTCTTCGTCGTTCCTGGGTGTAGAGTCCTCGTTGGGAAATGCACGTGCCTTCGTTGGATTTCTTTGTTCCATGGTTTGGAGTTTGTCATCGGTTGCAGGTTTTGCATCACCC
>DN18797_c0_g1_i1	len=240 path=[0:0-239]
GCAACAACAAAAGATCAGAAAGATGAACAGCAGGTCCAAACAGGGCATATGCCAAAAAGAAACAAAACAGATCCATCGCTAGAAGAAAAAAGCCCCCAAACTGGAGATAGATTCATTAACGAGGAAATCGAACTGGATCTGCCCAGGAATGACAGAAGCCCCTCGCTTGGAGAGTAAGTCTGACATAGCATTCTGCTCACGGAAAATGTGGTAGAAGGAGAGAGAATTGAAAGTTACCAT
>DN18700_c0_g1_i1	len=465 path=[0:0-464]
TCGTTGGTTGGTTGAGTAGCTTATAATTTCCATGGAAGGAATTCTTTTCGGCCATTATATATTATATACTTCTCTCACAATCATGCAAAGATGTGCTCCTCATTCATATATAAAAGCTTTGTAACGTGTATCCATAGAGCACTGTGTTGAGAGCGCTCTAATTTGCATTGAACAGATCCTTTAAAGTTTACCCTGACATCATCCTTGTCTCACAGTCAAGAGGCAATGTTCCCCACATACAAAAAGCATCTAGTACAGATAATGCATAGAATTACATGGCTGACATGATGTGACTTGGAAAATGGAGGAAGGTTTAGAAAGGAAATCTGTTTGGTAAGGTGAAATGGAGGGACATTGAAAATGATAGAGAAATCAATATTACCATTGATTGTTGGAATC…
>DN18708_c0_g1_i1	len=411 path=[0:0-410]
AAAAAATATTTCACAAATTTAAATTGCTAAATTTAAATGAATTTAAGTGGTAGATTTGAATAGCTATATAAATTAAACCGTGGATAAACCCAAATAGCCATCAAAATACTGATGGCCGATAAATGCTCATAGTTCTCAAAATATTTATATGTTATTTAAGTAAAACAAAAAAATTTAAAAACTTTTTACTGGAGGGAGTCACTCACTCATTCTGATGGGTGAAAGCTTAACTGTTTAGGAGAAGAACTTGAGTTACTCAACCATAAAGATGCGTAAGCAAGCTGACTGTTAAAAAAAAATCTTTAAATTATATATGCCAAAAAAATATTCTGAACTTACATGTCATTTAAGTAAAACAAAAGAAAATTAAAACTTGATCCTTGATTTGTGTATTACACG…
>DN18718_c0_g1_i1	len=458 path=[0:0-457]
GTGTTCATGTTATCTTCAATCCCTGCTCTACTATCTTGACATGAAAAACTGAGTTAAATTGACAATTTCCTCAATTCTAGAATTTTTACAAGGATTAGCTAAGGTTCTATATGCAGTTCCAAAATTGGCGAACTACCAGATTTGGCCAAAATTGCCACCAAATCTCTCCATGCCACCAAAACAACTACCCACTGATTCATGCATGTTATCCAAGTGCTTTGGCACACTGATAGTTTTGGTGCAAAGCTGCCAATTATGGCTCAAAATGCTAAATATGTTGACACATGTTCATGGCTTAATTCCCATAGGCTTACGCTCGTTCCCTTGGTCACATGAACACGCGAGACCGAATCTTGGAGAGCATCATTAGAACCTGATCTTATTTCACCCGTGACGGGA…
>DN18770_c0_g1_i1	len=849 path=[0:0-848]
GATGGAATCTACTAGAAACTCATTGTAGTTGAAGATAATTGAGGGCTTTTCATCTATTGAGAAGATTGACAAAAACCCTATGATGGCCTCATCAACCCACTGATCGGATTGGTAGCTCAGTAAACAAGAAACAATGGAGATGATTTGTTTAGTCATATCACAAAACATGGAGGATGAATAGGGGGATTCTTCTTTGGTAATTGGGCATCCTTAGGGAGAAATGTTACAAAAATCTTTGCTCTATGAGGAAAGGTTAGGTTCTTGTAGAGTTCCATGAGGGAATCTACTGTAAAAGGTTTCAAAGGTGCAGAGTTTTGAATTTGGAGCATCTAGGAGATGGATTCAGAGATGATGGTGAAAAGGATGTCATTATTTTGGGCCACAATTGCCCTCTGACTA…
>DN18734_c0_g1_i1	len=236 path=[0:0-235]
ACACTACCTGGCAATTTTACTAATTTGCTGGTAGCATGAATGTCCTTACTTCCCACTTTTCTTCTATAGGACACTGACTCCCTATACAAATAATTATTTCAAAGGGACTAGAAATTTGAACAAAGGAGGCTGCCATAGCTCCTTCATTGGGGATTTTGTTAGAAAATTTAGGAAGCGTCTCATGAAGGGGATTTTGTTAGAAAATTTAGGAAGCGTCTCATGAAGGGGATTTTGTT
>DN18704_c0_g1_i1	len=740 path=[0:0-739]
AAAATGGAGAGTTATACTTTCAAGGTTGGTGCTCTAGCCATTTTGGTGTGTTTGTTGTTCCTTACCACTAGTGTCCATCAATTTTCTCATGTGTTCATTGCTTGGGAGGCTTTAGGAGATGGGGTGTTTTGCATGCTCTGGGTTGTAGCAGAATTAGCTTGTGATGTAAGCAGACAATCATGGATACTGTGGTCTGGGCTTTGAAATTGAAAGCAAGTGTCAAGTGGATTTATATAATGTATCCAATGTTGTATAACCTTACGCCTTACCTATATGAACACAAATTCCTTAATGTCCTTTGACAGTTTCACCTTAACACAAATTCGACCTAGGGTTAAAGAACCATTCAGTTTTATGGCATATGAAATTCCCTAAAGGTGAAGACATACACTCTAGGGC…
>DN18720_c0_g1_i1	len=213 path=[0:0-212]
GGCAGGGTGTTATCATGGTAGTTAACCACACTTACCAAATTCAAACTTCCTAGCCCCATACCCAGATCCAAATCTTAATCTGAAGTTTTGAAGACGCTGATGCAGCTGTAGGCCCTTCCCAATTTACTTGCAGTGATGCAGGAATTGGAAGCCCAGAGAAGCCTTGAATAACTCGGTCCGATTCATATCCCTCTCATTGGTCCTGATTCATGA
>DN18762_c0_g1_i1	len=292 path=[0:0-291]
GTCAAATTTTGGGCGTAGCTTTATGAATATTGATCAGTTTCAGGGTTCTTTGAAAGTATAAAACCCTAACTGATCAGTCATCTACAATCGTAGAAGCCCTGTTTGTTAGAATCTGAGGGACAGTATTAACAAAAGATAAGGGCAGTGAAGGTAAACCAGCAGAGGTCAGATTAGTGTTGCAGATAGACATCCTCAAGCATATTCTTGGCAGCAAGCAGATTCAAGGTATCTTCAGGTACAACTGTGGCAAAAGACTTAAGGTACATGAATTGTTGAAGTGATGTTGTTATAT
>DN18783_c0_g1_i1	len=375 path=[0:0-374]
AAATAATTATTAGGTGAAAAAGTTCTAACCACAAATTGTGAGAACTCAGAGACACTATTGTGCAAACTTCTAAATTTTTTTTTGATGGGAACAAACAACCTCCCCAGGTATATGTAATAACTGGCCAGTCATGTATATTGGAAACTCAATTCAGCCTAGGACCAAAACATTTGGAGACCCACCAAAAACCAGAGCCTGGATCGACTACAACGGGTTGGCTATCCTTCCATTGTTACCAACCACACATTGTGAGCCAAGAAACACCATCATGCAAACCACCCGCTATTACCTTGACGATCTTAGCCTGTTCTTCAGCCAACAGGAAAAAGGAAGGTATTCCTAAAATTCAGCTAAACTATTTCATCATAAGTGGAA
>DN22802_c0_g1_i1	len=588 path=[0:0-587]
AAGTATATTTTCTACTGAAATCATAAAGTTATTTATTTATTTTTATTTTTATAATATTCTGGAAAATAAAAACTAATTCTTCAAATGAAGGATGACCTGGCTGAACAACTGCTTGATTGGAGGGATTGGTTGTTTGAGATGACCATCCATGTTATGAAGACAGTGATATTTTGACCCTAGAAACCAGGAAAATTTAATAGCAATGTTTCGTAAATGAGATAACCTTACATAAGATTCTATATTCCTTGGGGTGGCTACATAAAGATGAAAGTTTAAAAACGTCATTCTTAGTGTCCACTCATTTTAAAGTACCAAAATTCTTTAAAAGTTACAAAAAGTTCACTATTTTTACGGGTAGCTGCTTTAATTAAATTGCTTTGGAGATTTAAGCATGGTCTG…
>DN22801_c0_g1_i1	len=319 path=[0:0-318]
GCACAGATGCATCATCTTCACACGAATGCATGATTAATCCCAGAGAGCGGAAGATACGGACTTTATTTTCCTTTCCCCTGACTTTCGTACCAACATTTTTCAACCAGGCTCTACGGACATGCCATACACACAACAATAGTGTACAGTTCGTGCAATTCCTTAATGCCTCGATTTCCGCTGCTGCATCATCTGTGATGAAAGCTCGGACATGCCAATCTGGGTTTTCCTTTTTCCCATTTGCAAATAATTGTGACATCCATTTACAAATATCAGGAGTACTGTTTCGTGATGATATTACCCATGCCACTGGAATCCCATA
>DN22844_c0_g1_i1	len=370 path=[0:0-83 1:84-98 2:99-369]
GAACCTCTCAATTTTTCTCTGCATCAGCTCAAGTTTGGTGTTTATGAGCAACTGGAAAGATTTCTGCTCCCTCTCTTCTGCCTCGTTCCTTTAATTCAAATTCCTTTGATTCAATGTGTACAATAGACCTTCCATAGCTTCTAAGAACCTGTCCAGAAGTTGGCTCGTATAAACTTGCTCATTTCCATTGGATGAAGAGCTTATATTCTCCATGGAGGGGTTGCGCAGCGATGGAATTTGCCACCCAGGTGAAAGCGTTCTTCTCTGCATCAGCTCAAGTTTGGTGTTTATGAGCAACTGGAAAGATTTCTGCTCCCTCTCTTCTGCCTCATTCCTTTGATTCAATGTGTACAATAGACCTTCCATAGCT
>DN22844_c0_g1_i2	len=355 path=[0:0-83 2:84-354]
GAACCTCTCAATTTTTCTCTGCATCAGCTCAAGTTTGGTGTTTATGAGCAACTGGAAAGATTTCTGCTCCCTCTCTTCTGCCTCATTCCTTTGATTCAATGTGTACAATAGACCTTCCATAGCTTCTAAGAACCTGTCCAGAAGTTGGCTCGTATAAACTTGCTCATTTCCATTGGATGAAGAGCTTATATTCTCCATGGAGGGGTTGCGCAGCGATGGAATTTGCCACCCAGGTGAAAGCGTTCTTCTCTGCATCAGCTCAAGTTTGGTGTTTATGAGCAACTGGAAAGATTTCTGCTCCCTCTCTTCTGCCTCATTCCTTTGATTCAATGTGTACAATAGACCTTCCATAGCT
>DN22871_c0_g1_i1	len=1367 path=[0:0-1366]
TTAATGCTAAAAAAAAATAGCAAATGTACAAATCAGTAAAAAGCCAGTAGACATGAAAAATTGGAAAGAACAGTAGTGCAGATATATTTTAACCTCAGATTTATTAAGTGCCAAGAGGGATTGAAAATCCCCAGGAGCCAACCTTTTAAAGACTATCTAACCACATTGAAATTGGCACCTCAAAATTTTGATATCACTTAATGCTTAATATATATGGGGTTAAGATGGAAGTTGGATATATAATAGTTGTTTAAAAATCTCATGTGTGCCATTGTGGGAAGGCAATGGTTAACTGATGAGGTTAACAGATTGTTAAAGCTAAAGCCATTTACCTAATATCCATAGACTTTGAGCTCTTGGAGTTTTTCAATTCCTCTCAATGCATAACAGATAAGGGGA…
>DN22822_c0_g1_i1	len=378 path=[0:0-377]
ACAAAAGGCCAGGTTGCTATCATGATTTTTTCAATCTATTGGATTAAAAGATAGAATTAATTTGAGGTGGTAAGATATATTGGATAAATGTCGAAGTAATTGTATGTAAAGTTGACAATGGCTAGGGACCATCAGAGAAAGCGAGGTAAAATGTGGATAAGTGATTTCATATAAGAATGGATTGTCTCGATGCATGTGAAAAAAATGTCTCTACCTATGTGTATAGATTTGCAGTGTGATGCAAGTTTGAGGAAATTGAAGAAAAGAACAAGTGATAGTGACTAGGACATGGGGATGCTACCTCCATGCAAGGATCCAACTACGAAAGGCTTGCTACAAAAGTTGAAGGGTATGAGCATGTTGATACCTAATCATCAG
>DN22829_c0_g1_i1	len=1478 path=[0:0-1477]
ACAGTGAGTAATTATCCTAATTCAAGGACATATTTGATGGACAATAAGCTATTAGGTTATTATGAACTGCTCTTAATAGAATCTGGGAGCTTCTCATTCTCAAGAATGATTTTCGATACACCTGTCACAGACAATGTTGTTTCGTTGCTCTGTAACATCACTATGCAACATGGAAGACTGTTCACCAGATTCCTAAAATAAGATTCAACTTTTTGAGGATGCACATGAATCACCTTAAGACATGCTTTTTCATCATTCTTTACCTATCATTCCCTTGGATGATAGAGTTTCCATGTTTGATTTGTCTTAATATGCATTATTTGTATTAGCCTCTGCAGAAGTTTCGGTTAGAGGATGACATTGGACAGTGACTGTTGAGTTGATGAGGTAATTTATTCA…
>DN22816_c0_g1_i1	len=543 path=[0:0-107 1:108-298 2:299-420 3:421-542]
AGTGAATCAGCTTGACAATTGTGATTCCTTAAGACCTGGAAAAAGGAGCAGCGAGTAAGCTTTTACATGGTTGTGGGATAATGTTCCCAATCTCTAAGCATATTGCTTCGTTAGGAAGTGAATCAGCTTGACAATTGTGGTTCCTTAAGACATCAAAAAAGGAGCAGCAAGTAAGCTTCTGCCTGGTTGTGGGATATTGTTCGGAGCAGCAAGTAAAGCTTCTGTCTAGTAGTGGGAAAATGTTCTCAATCTCTAAGCATATGGTGGGATAATGTTCTCAATCTCTAAGCATATTGCTTTGTTAGCCATAGCAAGTGAATCAGCTTGACAATTGTGATTCCTTAAGACCTGGAAAAAGGAGCAGCGAGTAAGCTTTTACATGGTTGTGGGATAATGTTC…
>DN22816_c0_g1_i2	len=230 path=[0:0-107 2:108-229]
AGTGAATCAGCTTGACAATTGTGATTCCTTAAGACCTGGAAAAAGGAGCAGCGAGTAAGCTTTTACATGGTTGTGGGATAATGTTCCCAATCTCTAAGCATATTGCTTTGTTAGCCATAGCAAGTGAATCAGCTTGACAATTGTGATTCCTTAAGACCTGGAAAAAGGAGCAGCGAGTAAGCTTTTACATGGTTGTGGGATAATGTTCCCAATCTCTAAGCATATTGCTT
>DN22857_c0_g1_i1	len=288 path=[0:0-287]
AAATGGGAACAAAGCCTAGGGATAATCTTAATTGGTAATCGCTATGTTATGAAGTATTATATAAAGCATGAAATTCCAGCAAAAAAAACATGGAACAAGATTCTTAACCATAGGGATTTACCCTCACTTAACCATGGAGATTCTTAATCTACAGATGGGATTTGTTACAAGGTCAATACTGTGACTTATAAAAAATCATAACTTTCTTCATATGACACTTGCTCATATGATTTTTTTTTAATTGATAAATTTAATGAAAAGAGTAACAAGGGCATAACTACTTTGGAG
>DN22879_c0_g1_i1	len=352 path=[0:0-351]
TACTTAAATGTAATGTCCAACAGAACCTAACCACTATCTAGCGTGAAGAAATAACTCTATACAGTTATATTTTCAAATGGTTGATTCTGCAGTTCACAAGCTTTGATGACCAGCTAGGAACACTGACTTTCCTCTCTAGCCAGCCTAAGTTTCATGGTCTTTTTCATCCAATCCCACAGAATGGTGGTGCTTCATTTAACTGGAACCTGGCACGCAGTGCACAATCAGAAAGCAGAAAGAAAGAAGTGAGGACCCGGGTATACAATGGTTCATTGTGATACATTTGTACGGAGTTTTGCTTGTGTGGAACTTGTGTTCATTTATCACAATTTGCGTAAAGGTTCATTGTGCG
>DN60497_c0_g1_i10	len=264 path=[2:0-51 27:52-135 29:136-146 30:147-199 31:200-263]
AGGGTGTCACTGTTTTAGTGGATAAATGAAAACAATATAAAGTGTATCTCCTAGTTTTTGGAACGTGTCATATTCCACTGGACATCCAAATCAGGGTTCAATACCAGTAAATAAATCTTTGAATGGGGTTCTAGCAGCATGTCAAATGGATCCAAAATGAAAAGAAGAGCAAATGTAGCATACAGATCACAAACTTTTCCAGCTCCTGAACCCTCAGTTCAAACTTTAACAGCAAGTCCATCTGCAGTGCAAAGCTTATTTGTA
>DN60429_c3_g1_i1	len=205 path=[0:0-204]
GATTGTCTGTCAAGTGATAATCCTGGTTTCGAACAATTAGATATTTCAGAAAAAGCATACTATATGGCAGCCAATTCCTCAAAAGACAACAAAACTGCAATTAAATCTGCATATTCCAAATTTGAACAAATAATTTTTCTTTTCGAATTTCTTCAATTCACCATGCCTACTTAACCATCCACCTCTGATATATTAGATGATCCCT
>DN60429_c2_g1_i1	len=292 path=[0:0-291]
GGACAAATATTGTGGAATGGCCTGCAAAATATGATGAAGTAGCAGAACAACCGGACTTTAGATTTTATCCTGTGCAAATTCTTCTGTATTGAATAAACGTATTCCACATATTAAACAAATTAAGAAAGTCTACATTTGCTGCCTACAATCTTAGATCTAAAAGAAGGGCTAGAAAAGTTTTTTAGGTACCTCTGCCACAAAACTGTCATTTAGCAGAAGCATAAGTTGAATTAAAATCTGTTTTAGTATTAATAAGATACTAAAATACTTTGAGGTCACAGAAGAATGGTAT
>DN60411_c3_g1_i1	len=282 path=[0:0-281]
CAACAGAATGTTAAAATCAGTTGTGTTCTCTTAAGAATTTTTTGTTGCAAAAATAAATAAATTATCATATCCCAATATTTAGACTCAACACGTTTTTGAATCTTACATTGCTTGAATAAACCTAATGGCTGTATTTCTAATTGTTATATGATTTAATCCAGTAATTCACAGTTTCTGTTTATCTCCAAGTCCGAGTCACTATAATGGTTTCAGGATAGATTAGTATTTCTAATATCTGTACATGTACATCCTGTCCTCAGGCAGCTGACTACCTTTCCCAAG
>DN60411_c1_g1_i1	len=345 path=[0:0-344]
GAGCAGAGGTGGATTCGGTCCCCACTTCAAAAAGATGATCACAATCAACCACAATAGAGAATGAGACCATATGCCAAGATATCTTTCTATTCTCAGAAATAGAAGACACAGCACAGAGTAATAGCACATACGTTCAAGCTTCAGAAAATACGACAGAATAACTTTCTGAATGTATCTTCGACATAACAAAGAAACGCAAACCCAGAAGAGCGGGTCGGTTGGGAGAACTTACAAAACTCTCTCCATCTAGTGTATGTTTGAAAAGGAAAATAACCAACCCAAACAAAGGATCAGTTGGGAGAACTTACTAAATTTTAGACGAAAGTTGGGAGAACTTACTAAATT
>DN60440_c0_g1_i1	len=767 path=[0:0-766]
TAATTGTCTGTTTTCTTAAGCCCGAGGCTCTGAAGGTTTTAAGACCCCTATCTCTTTGATTAATTTTGGTGGAGATGATCCCATCTGAGCTAATCCTCTTTTCTTCTCTCATCTGTTTTGGTAAATTAGTCTGAGGCATTTTTTATCAGGTTTGGCAAATCGAAGGAGTATTTTTTCCCGAGGCTTACTTGGTCACCAAGTTCCTGTTCCAAGCAGCAAAGACCATCTATTATGGGATCACCGAGTGCAGTTTCTGATCAGCAAGAACAAATCTGGGCAGACATCTTGTTACCACTGAAATTATGACAGTGAGAATCATTTCTGTAGCTTCCAAAGTTTGTTTCAAGCAGCGCAGGTCGTTTTTTAGGTGGCTGCAGCTGCAGGGCCTGAGGAGAAAGA…
>DN60461_c0_g2_i4	len=459 path=[19:0-324 20:325-458]
AAATACCAAATAGAAACTTATTTCTTGATATTCCAAAGTTGATAGTAGCATGCAAATAATAAGAGTTCTTAAGAGCAACTGCTACATATTTTTACCATACGAAAGGAATAAGTTTAAATTAATGCTCCCCCGGAAGTAGCTCACTTGGCAAGCCCGTGATCTGTAAAGTAATGTGAGTGATGAAGGTCCCATGTTCAATCCCCCAGTGCAGACCTGTGTTGTCGTGTTTGCGAGGAGGGAGTGATGCCTAAAAGTTACAGTGGTACCGGTTGAAATTGATCCCATGGCACACAAGTATGAAACCGGCCCAGTTGTCGATTCCTCTAGACACAAGAACAAACATGCTTTTACTATACTGCAGCACTAGTGTGAGGCATTCATGTTAAATCTCTTGCATAA…
>DN60480_c7_g1_i4	len=209 path=[3:0-41 12:42-43 14:44-208]
ATATGGAACAAAAAGAAAATTAAACGCCTCACAGTATGACCTACTTTTCATGAGGAGCTATCCTCCTAGCTTAGGCATTGAGGAGCTGGCTTTGATGTTGTATCCCTTTCTATTAGCATTTCTGAACTTTTTTTGGAAGGGAATACCTTGTTGTTAGACGACTGTAACTCTGCTTGTTCTATGAAGTAATGAATGATTCATTTCTAATA
>DN60498_c2_g1_i1	len=445 path=[0:0-444]
ATCTGCAACCATTGTTCATCAAGGTCATTCATGTAAGGGAGATCCGTATTCTCACCTTTGCCTGGGAGGTCTGTAATTGCTACTTATCAGTTTTTGATCTTCATATTGTGACTGCTTATGATTTTACTCATAGCGACCCCAATGAACTAGTGTGCTCCAATTTATCCTTCCAAATCATCTTACCTGGAAATATGGAACAAAGGCACTCCAGGGAGTGGGCTGTATATGGTAAAAGTCTATTAGTGCACTTTTGAAGGCCTCACTTGTATCACTGTCAATCCGTTGTGTTATGCCCATGTCAACCCTTGATCCTGAGATTGAATTGATTGAGATATTAGCACTGAGAGAAGCAATGTGCTCTACAGCTTGGGTGGGACTGGAGGGATCCATCAATTCCTC…
>DN60431_c0_g1_i1	len=475 path=[0:0-474]
GGATGAGAATAATGAATGACAATGCTAATCATGAATGATGCCTAATAATTGCTATAAAACCACTATATTTCAAATGGAATTTACCAGAGCGCTAAAATTAAATGGGTCAGATTGACCAATATTCCATTCCTTTACTTCCTGCATTTCGAGGTGATATACTGACTATAAGAAAAGATGGAATGGGCATGCTTTGAACCTGCAATGAAATGAACCTCTAGAATGACCATAGATTGTAACATAAACCCACAAAAAGAATTAGCAAAAGTAGGAATATTTGAACAAGGGTTCAAATCCGATCTCTACTCGATGCTTCTCTTGAATTTAATATGAAGTTCATCAAATAAGTTTCCCAACTAACAATTAGGATCCATCAGGGCAAAACAAATTTCCCACCGAACA…
>DN60430_c1_g1_i1	len=218 path=[0:0-217]
GGCTAGGGAAGCAGAGCATAACGGTATGCCAGTTGACTTAATGGTTTTTTAATGTAATCTGTTTTTGTAAAGTGGTATAAATGGCATACTTTCAGTAAATCCTCAGTAAGAAAAATAGCATGAAAAGACACTCTTGTCTGGCCTTGTTTTGCTATATTTCTTTGGTGTTGTTCACTTTTCTTACTCGCTGGTTAGGATGACCGAATGACTGCTGCTCG
>DN60430_c2_g1_i1	len=299 path=[0:0-298]
ACCAGATATGCAGACTTTCTGAGAGTGGGTCTTGTTTCCTTTTCTAGATACCAAATATTTTTATATGATATCTCCCCACTTCATTTGTCTCATGTTCTTCTTCGGATTGAAAGTCACAAGTTACAACTAACTAACAAATTTAGTTGCTTCTTTGCTATTTGATCACATTGAGCAAAATATTCTAATTCAATTCCAGGCTACAGACAAGTGGATCAAATTTTGTATACTTTCTTTTACGGTTCTAATTATTGTATTTAATATTTGTGCTCTGTCAGCCTGGTGTTAATTTAAAGCATGCA
>DN60477_c0_g1_i1	len=533 path=[0:0-532]
GGGGCACCCTATGCTACCCCAAAAGCATAAAGCAAAATATAACAGGATCAAACAAGAGAACATGAACTAAATATGACATCAAAAAAGTGGAAAAAGGATAGAGTGCAAGAGATTAACTAGAGGTACGTAAGACAGGATGAAGAGGAAAAGGGTAAAAAGAAGAATCTACCATGGAATCAATCACTGATAATGATCCAATACACTGTCTAACGATATTGTCTGGGCCCTGAAAAGTACCCATGCCTGAGAGGACCTGGCTAGATGATCCTGGGAGGCATCTGCCAAACATGAGCAGACCTCCTCCGCACATTCAAGGGCAGTGAAGTCATGGCTTAAAGTGTGTGCATCATTGAACCTTTTGATGAAAGAAATTCATAACCAAGCAAGCCACTAATTCTA…
>DN60421_c3_g5_i1	len=389 path=[0:0-388]
CATGCCTTGAGTCAATGAAACAATAGAAACCATGGATTTAAGGAAAAAGTCCTAAGCAGTGTTATAATGCATCAATTATATTCTTTGGGCATTGATGGCATCAAATGATGAAGAAGAATGCCTGTCTTGAATCTTGATTTTGATGCCATAAATATTTTAAGCTACAATCTCTCATGCGAATGGTATAGTCATTCATGTAACTTTATGTGATGGGCTCCCTGTTATATTGCTATTTAGTGTTCCTTCAATGACTATTTCCTATTGTGGATCTCTAACACAAACCAAAGCAACATAAAAACCATTAAATCTGATCTAATCTAGCTGTGATTAAATAAAGCGGTCAAGCATAATTGAAAATATAAAGCAGACTAAAGGAATTAAAAACATAT
>DN60421_c1_g1_i1	len=580 path=[0:0-400 1:401-416 3:417-440 4:441-461 6:462-520 7:521-531 9:532-579]
GGAACTTTCATGTACGCACTTTGAAAATGGGTTTTCCTTTTTCTAAGCTGGCTCGCCCGGTATGACAATCAAAGAGTGGTTCACATCAATACTCAGGCTAATTTAATTGAAACTAAATTTCCGTAAATAAAACCGATATATGCAGCCATGTAAACGCCAATACATAGAACCTTTTGGATGGAGCTAAATCCAAATTATGCTCAGGAAATAAGGTCTTTCTTGCAAATTCAACAAAAGATTTGAACCCTATAGCTTAGAGTTCATGTGGATCAACAACATTGTAAAACCTGTAAGACCTGTTTGAGTGAGCATTCTGTTACTCTGTTATTGTTGCCAAGGTTCCCAATGATAAAGATGGCGCTTCAGGTGGGAAAAAAGATAAAAAAAGCCACGAGGAAA…
>DN60421_c1_g1_i2	len=580 path=[0:0-400 2:401-416 3:417-440 5:441-461 6:462-520 8:521-531 9:532-579]
GGAACTTTCATGTACGCACTTTGAAAATGGGTTTTCCTTTTTCTAAGCTGGCTCGCCCGGTATGACAATCAAAGAGTGGTTCACATCAATACTCAGGCTAATTTAATTGAAACTAAATTTCCGTAAATAAAACCGATATATGCAGCCATGTAAACGCCAATACATAGAACCTTTTGGATGGAGCTAAATCCAAATTATGCTCAGGAAATAAGGTCTTTCTTGCAAATTCAACAAAAGATTTGAACCCTATAGCTTAGAGTTCATGTGGATCAACAACATTGTAAAACCTGTAAGACCTGTTTGAGTGAGCATTCTGTTACTCTGTTATTGTTGCCAAGGTTCCCAATGATAAAGATGGCGCTTCAGGTGGGAAAAAAGATAAAAAAAGCCACGAGGAAA…
>DN60417_c1_g1_i1	len=1040 path=[0:0-1039]
GAAGCTTTTGATTGATAGAGCACTCTTGAAATGAGAAAGATGCAAGAACTTACACATAACTAATTTGAAATATTATTCTTAGACAAATAGTTAAATGATAGAAATCAAAATAAAGTATGAGAAGTGGAAGAATCGTTAGAATAAACCCCTAAATCAAAAAAGAACAAGAAAAAAAATATGGTAGGGAGATGGATTAAAAGATAATATGAATGGGCCCCAAAGATCAGCTGAATCAGTTGAACCATCCGCTTAAGGCATATTTCCAACAGAGAAACTGATCAAATCTCTCAGGGTTACCAGCCGCTATTGTGACTGGTATGGTTTGGCCACTCTCCATCTGGATATTCTGAGGAAAGAGAGGTTGGCAGAAAGGGACACGCAAGGTTTTCCTCGTAAATA…
>DN60417_c2_g1_i1	len=276 path=[0:0-275]
GTGGGACTCCCATATTTTAGAGTGAGTCTCTACATATGTAACATAAAATGCAAAAGCCTTATTGCAAGAGAACCAAATGGAAGAAAATTCAGAGAGATATTGTTGGTGCATTGCAAAGAAAAATAGCCGTAGACGAGGAGCACAAGCCTATGGTATCAATAATCATCAAGGGTCAGCTCATTTGGTTCCACTCTTCCCACCCAGGCATAATGTCCAGGGAGGTCATGGGATCCATTCCCCCTTAGTTCTGTGGGGTTACCAGCCGCTATTGTGACT
>DN60466_c0_g1_i1	len=240 path=[0:0-239]
ACTAAATTTTTTATTTCTTTAGTGTTAAAACAGTCATGCAGTTTCTTACTCTATTTATTCAACGACTTCTTGCTTTGCTCCATCCATGTTTTCTTCATACTGTTTCAGTCCTCCACCACAGCTATATTAAGCCACCATTAATTATTCATGTTTTCAGCGTTCTTTGACCCATCCAACGGATCATTACCTACTTCAACTGAAAGAATAATGTTTTACAGACCCCAAGGACATGATTGACTA
>DN60468_c4_g1_i1	len=215 path=[0:0-214]
TGTCTAAGATTGGAGGGCATCTGAAAATTAAGCATATCTGAAAGTTATTCTCACATCATTAAAACTAATAAAACTGCGCGCGATATAGTTTTATAGATATTCCAAGAAAATTGAGAAGAGAAATAACGAGGACCAAATATTTGAAGTAAACTTGCCTGACTTAGATTTTGTAATTCTGCAGATTTGAAACATAGATGTCTCAACTCCTTGAAGCA
>DN60415_c0_g1_i9	len=705 path=[1:0-65 31:66-80 32:81-286 33:287-704]
ACGAGGGATCGCCAGTGGTGGATCCCGCCGATGCAGACAGGCAATTAGGGTTTGGAGTGTTTGAATGGTTAAAAAGCAGAAACGAGGGATCGCCAGTGGTGGATCCCGCCGATGCAGACAGGCAATTAGGGTTTGGAGTGTTTGAATGGTTAAACTGAGTTGGCGCCGAGTACAGAATTGGTAAAAGAATAAAAAAAACCTTGCTAGTTGCTAACATTTAACTGGATAATGAGGGGTCATACACTTGGACCCCAGTGGTATGGTGCTGACGCGGGACGGATCCATACCTGCCGTCGAATATGCCCTCTGCAAATGATTGGCCTACGAACCTAGGCCCTGGATCGCTCGAAATCCCTTCCCGAGAGGAAGGAAAGGGCGTTCATTACCATGCTCTTAAAA…
>DN60415_c0_g1_i13	len=438 path=[2:0-19 33:20-437]
ACCCCCGTGATATATAATTTCTGCCGTCGAATATGCCCTCTGCAAATGATTGGCCTACGAACCTAGGCCCTGGATCGCTCGAAATCCCTTCCCGAGAGGAAGGAAAGGGCGTTCATTACCATGCTCTTAAAAATCTCGCACCTTCCCATGAGCGGGTGCTGTCGGTTTCGGGAAGTGCGCTTAAGATCAAGGGCTTGCGTGTACGTACACCTCTGACACAGCTGTATTTCGAATTTGGGCGCGTACGGATGAATAGAGGTCTTTTGTCATCGAGAAACCACCATCTGGTTTTTCATGCTCTTCGAAACTCCTGCTTTTTCAGGCGTATGAACTGGGCGTTAACCCCGCTGTGCTCTTCGTTGAGATGAGATATCTCTGTGTTGACGAGTCACAGTCATA…
>DN60445_c3_g1_i1	len=379 path=[0:0-378]
TAATATTCCGGATCCAGGTAGCCCTGCCCAACTCATTATTGTTTCAATTTCACGATTAGACATTAGTTGCCTTGAGCTTAAGTCCATTGTAGATTACTGCTATATTTGGGGATCGGGCAGATATGGATAAAGGTAAATCTAATTTTGGAATATAATTGACTTCACCCATGTTTATCAAATTCCAAAATATTACATAAATTTTCAATAACAATGCCTCACTAATTCTCACTAATTGCACAGATTCCAAAATATTACAGAAATTTTCTATGACAATGTCCCACTAATTGCACAGAGTTTATGCCGTTTTAGGAGGGCTGGAAAGTTTGATGAAAAACATATGGAGTGCTGATACTCACCATAGTTCCTTTGACTTGAGTTG
>DN60445_c1_g1_i1	len=278 path=[0:0-277]
AAAAAGCTTTACCAACACTTGGGCGTATTGATTTCCATGATTACCCTCTAAACTGATTCATGTGGATTTCTGCTTCATTTATATATATCGGAAACCTTGCTGTATCTATAGGAATAAGAAGAGGGAAAACACTTTGCATATGTGAATTTTTCTGGCATTTTAATGATGTGATATTTGAAGGTTAGCTACTTTTATTCCAAAGTTGTACACCATCAATTCCTTAATGTAACTATCTAGATTTTGTCTGAATGCAGACTTGAGGGTAACCCAGTTTGTGA
>DN60445_c2_g1_i1	len=782 path=[0:0-781]
GCGCCTTTCAGAACTACAAATTCTGTAAGTTGACGGAAGTCATCACAAGAGTACTGCATGGCTAGTACCATCCAAACCTGGGTAGCTAGTACCATCCAAACCTGGGTCTGAAATGAATATGAATATATTGAAGTTGCTAAGGGAGTTATATTTTTTCTATGTGCTTCACAGTTCAGGAGAATGGATGTCATTATGTCCATATATATAGGTTAAGTGCGGTACTCTAATTTAATTTATGAGTGTTTAGAGAATTGAACTCATGACTACTTATTTAATAGTAGACGATTGAATTCAGCTCAGAATTGAACTCATAATTTCTCAATAGCAAGATTAAACTCATAACCTCTTAATAGAAGAATTGAACCCATCCCCTCTCGAAAGCAAAAATGTTTTAAAGGA…
>DN60445_c5_g1_i1	len=289 path=[0:0-288]
GCCAGATTTTTACCAAAATCATCTCTGAATTTCCATTATTTTCCTAACAAATTTGCATTCTCGTTAGACTACTCGCCCGGGAAACTAAGTAGAAATTGTGCAAGGCTTTCAGAGGGAAATTGGCGGTCCCAGGCTGGGAGGTTTACAGGAGTAGGGGGCTTGGATGCTTCCCCTTTATCCGGTCGCTCTCACTTAGCCAAGAGTTTAAGGTCAGTGTTCGTTCTATACACTAAACAATGAGTTCTTAAGACGACTCCAAATTTATACCTTGCCAAAGCCTCCTGAGCCA
>DN60427_c0_g1_i1	len=348 path=[0:0-347]
GGGGGTCTGACAAGTTTGTGACCAATTATTTCGAAGTTTGGATTTGTTGTACTACTTTTTGATATCAAAATTTGCATTTACTAGGTTGTTTATTCTCAAGAATGGGTTTCAAATACCATTGGATCTGAGTTAGGGAGAGCTGAGTTACCAATCCGGAGACAACATACCAAGCAATTGCAATGAGGGGGGTCTGACAAGTTTGTGACCAATTATTTCGAAGTTTGGATTTGTTGTACTACTTGTTGATATCAAAATTTGCATTTACTAGGTTGTTTATTCTCAAGAATGGGTTTCAAATACCATTGGATCTGAGTTAGGGAGAGCTGAGTTACCAATCCGGAGACAACA
>DN60451_c3_g1_i1	len=293 path=[0:0-292]
GTTCTAAAACAGTTCTAATATTATAATGTACATAAACCACTTTGCAACTTCTGTGATTACATGATCTCTTGTACTCTACATATATTTTACTAGCCTACACTTAGCATCCTTGTCAAATTGTTTGAATCTAGTATTTTTTTTCCCAAAAAATCTGACAATAGCAATGCTTTAATTTTGTTTTTATGGTAGAAATAAATTAGCATTATTAAAAAAATCCTCAAAACATCTAAAATCTCTTTAAAAAAAATTGTAACCTAAATTTCCGAAAATTATAGCTGTAGACTTCAGCGAAT
>DN60496_c0_g1_i1	len=421 path=[0:0-420]
AAACAATTTTATTTTCCCATTGAGATGAATTTTCTTAGAATCATGCAGTAGATTTTGTGTTATCTATGGCAAACATTTCTGCAAATAACGTTAAATAATGTAGTGTATTGAATCACTATTCGATCCATACTTTGTTTGACTTAACTCTGCGCCTTCCCACTCTAGTCACTCTTTTAATGATTCTATTTATCTCTATGGTAGTATTTTTTTGATCAGTTGGTTCATATCCTTTGTTAGATTTTCTACCTTGTTTAACTCGACAGCCTTTTCCACAGTACCAGGGTGCGCTCAGTCAGCAGGTACAGCAGTTGTAAGGGCATACTTTTTGCAGGTCCGTACAGCAGCAATAATGGCAGCAATTTGTCATGGTTCCTGTGTGAATTATAGTATGAAGGAGGT…
>DN60496_c4_g1_i6	len=344 path=[0:0-158 4:159-162 6:163-343]
GTCCAGCTTAGATTATTATTATTATTATTATTATAATGCATTCCATTTGCCAACTGATTTTGATATAAAGCTCCTGAATGTTTATCTAGGACTGTCCCGGACACCCATCATCTGAGTCTGGACTATATATCTAATTTGCTGCAGCAACGTTGTCATGTAACCTGCACAAGTTGAAGGGATTAGGCCAGGGTACCTCCACTTAAAGTTCTTTCCATTAAACTCGAGATAAAAAGGCTGTACAATACAAAGACTGACTAGACCATCATTTTGGAAGATACATATTATAAACAAGAGGTACCATAAAGTTGACTAGTAGAGCAATTGATTTAACAGGAATGGGATGC
>DN60494_c1_g1_i1	len=322 path=[0:0-321]
GATTCTTTTGAGAAGCTCGAAAAGGTATGTATGTATCGTGGATTTCTACTTGTAAAACAGTTCTAAAAGAAAAAGAATGAGGATGAAAAGGGGCCAGTGCACTTTTTTGCTTGTGGTAAGAGCAGATTGATTGGAATAGAAAGACCACCTGAAGAAAGTAGTTTTTTAAAAATTATTCAATCCCCCTCTGGTAATGCTTGAGCGTAATCGACATCGACAATTGTTAAACCCGCTCCACTGGCCTACCTCCACTATATTCAGGCCTTGACAAAAGTTCCAGTGTTTTTCTGGCTCTGCACACTGTCTCATTTCATAAACGGGC
>DN60412_c5_g1_i1	len=1540 path=[0:0-1539]
AGCGCCGTTACCCTTCGCTTCATGGTACTGACTATTTAGCTAACTTCTATTTTCATTTTATCATTTCTTTAGGGTGAGGATAGTCCTTGAAAAAGTACCTTCCTACATGACATAGACATTCGATGCCAACCCATGCTACGTACCACAATCATTATGAATATCCTCAACATGAATTGACAGGTTCGTCCTGCTGATAAGATTATTAATAACATCAACCGCAATTGGCCGGCCGGCCGTCCGTCCTTCCTCATAATAGCATTATTACTGCATTCAGCAAGGATTGACAAGCTATACGGCGTTGTATATGTAGTTGATGAGATTTTGCACGAAGCAGTTCCGCCCTTCACCGGAAACGTTTGATACTTTTTGTTACCCTCGCTTTTCCCTCGAAACGTCGTC…
>DN60412_c7_g1_i1	len=373 path=[0:0-372]
AAAATGAGGTATGCACCCCGCCTTTTCTCGACATATTAATCAGAAAATAACATGAGAATCCAACATTAAATCATCTAAAAAATTAAGAAACCAAGCACTATAGATTCCTCCAGCATAGATTAACTAAAATAGAAATTTAAAGGCAGAAAATTGTTTCTATTGTGCCAATAAACTTTTCCTGAATTAAACAAAATAACATCTTATAAAATCAAAACACACATTCCTAATAAAATCCATGCCTCTTTGAACTCAAAATAAACAGAAAAATCCTGGTAGGCATAGATTTAGAAAATAATCAATTGAAATCGAAGAACTCAACGAATTTTAAAGCAAGTTTAGCGGAAAATCACCTCTGACCCTCTTATCAACTGAA
>DN60412_c1_g1_i1	len=407 path=[0:0-406]
TGCGAGTTTGCAAGCCACGACGAAATAGCCAGATGCGGAGGGTGCAGCCCATGGTGTTTGCCCGTAGATTTTAATATGGAATCTGTTAAGCTGATCCCAGGAATAGAAAAGCAATTGTACGGCGCGCCTTGGGGTTTAATGGGAGTCATCGCAGCAATGCCACGGTGCGCCTTAGGGTTTAGTGGGAGTCTGCATTTTTCATGTTTATTGGATGTACTCAATCAATTGTTTCTCTTCTGTAAGAGCCAAATGCGGACGGTGTGACGAATCGTAATAATGACATTAAGCCCTAATGTCCACCGTACCACTACTTATTGTATTCCTAGGATCAGATTAACAATTTCCCTATTGAAATCTGCCGTTAAATACCATCGGTTACACCGTCCGCATCTGGTTATT…
>DN60412_c8_g1_i1	len=350 path=[0:0-349]
GGTATATCGTACTTGTCAAGAAATCTCCAATTTCTACTGTCTTCTGTCAATAGATATACCAAGCTTACTAACTTTAATCTTAATATCATTACATTTGTTGCCTTCCATATTAGTGACTCATCTCCGATGTTCAATGACTTCAGGCTATGGGTGGAAAGTTGATCATCTTGGATGGTTTCATTGAAAATGTAAATTGTTCCAAGTACTTTATTGGTGTCTTCGTAATTCACTTTCAAATCGAAAGATTTTGATGGGATATTTATATTTCCATTTCTATCCAATCACACATATCACAACCCTTCCTACTATTAATTAGCACGAGGAGGACCTTCCAATCATATGAGTCGAGT
>DN60442_c3_g1_i6	len=316 path=[1:0-24 2:25-71 6:72-167 8:168-315]
AAGTCGGTTTCAATACCATCTGCTTTCAGTGAAGTGGACTTTTTCTCGAAACAAGCTGCAAAATTTACCTAGTCCCCTTAAATGCCAATCAGTTTCCATACAAACGTGGAAGATGCTGCTGAGCAAAGATGCACTTTGGCGCCATTGACCGCCAATTACTGCTTGTAATCAGTGGGAGACACCAACTCAGCAATCCATGCTGACCTTAAATTTTTTTGGGCTTGACTTGGTGTCCGCACCTTCTCAGGAGAATATTTTGTATTATTGAGATTCATTACTAGTCCTGTTTTGTCCAAGATTTATATATTTATATCTG
>DN60442_c3_g1_i5	len=423 path=[0:0-57 2:58-104 3:105-171 5:172-178 6:179-274 8:275-422]
TAGACAAGCAAACCAAAACCACTATGTAGGTTTGAAGTCGGTTTCAATACCATCTGCCTCAGTGAAGTGGACTTTTTCTCGAAACAAGCTGCAAAATTTACCTAGGTTTGAACGCCGTCCAATTTTAAGTGAACTTTATTTCAAAATTTTGACTTCATAATGTTTGAGAGATCTCGCAGTCCCCTTAAATGCCAATCAGTTTCCATACAAACGTGGAAGATGCTGCTGAGCAAAGATGCACTTTGGCGCCATTGACCGCCAATTACTGCTTGTAATCAGTGGGAGACACCAACTCAGCAATCCATGCTGACCTTAAATTTTTTTGGGCTTGACTTGGTGTCCGCACCTTCTCAGGAGAATATTTTGTATTATTGAGATTCATTACTAGTCCTGTTTTGT…
>DN60410_c1_g1_i9	len=447 path=[1:0-140 35:141-149 38:150-446]
TATTGGGTCATTAATGCCCTCAGAACAACAAGCGATTTAAATTCGACATTAAATAATATTTACCCGCGCCCCTGTTATCTGACTAAGTGACTTGCTGCTATGAAAACATTAATGACCCAATATATCCGGTTAGCTCTTTCCTGCTAAGGTTGATCCGGCAGTACTGGCACCTGCTGCTCCATGGCGTAACGCTGATCATATCGTGATATACAGGTTGTTCCAAGCAGGTCCTCTAATAATAACTATGTTGTAAACAAAGAATAAATGTGAACTATGATACCAATCCTCAAAAACTATTATCATCTAAGGTATGACTTCAAAACTCCAACGGTAAATAAATTTACGGAAGAAAGACGGAGTCTGAAGTTTAAAAACATGTATTCAAACGCATAGATGGAA…
>DN60467_c1_g1_i1	len=280 path=[0:0-279]
TTGCTGAGCCTGAGAACACAAACTGAAAATTATCATGCAAACAGAAAAAGTATTCAGACAACTGGTGGTAGAGTAGCTATTTGCTTTGGTCACTTATATTTAAAATTGCTATGCACACACTGCCCTGAAATGATCCCAAGGAATTGAACTAACGACTTCTGTGAACGACATTACATCATAAACTGACCCAAAGCTATATCCCAACACTTAAATTTATCTTATAAACACACTGACACAAAGCTCAGTGCGAACATTTATATTTAACTTATAAACATACTGA
>DN60458_c1_g1_i8	len=241 path=[10:0-60 11:61-74 12:75-76 17:77-82 18:83-127 19:128-128 21:129-137 23:138-156 24:157-157 26:158-240]
ATGGGCTTCATACCATTTTCCCCAGAAAGATAAATGGGGGCACTCTGCCACCCAACAAGTTAGACATAATGCCTTCTTGAAGAAATTTGTCAGAAATAGTATTGAATATTGAAAAAGGGATATTACAGTGGTGTCAGAGCTGCTTTCCTACCAGCCTGGCATTTAACAAATTTCAAACCATATCACTAATGACTTTCAAAACCTAGCCATAAAAAATTTAAAGGCTTCAAAGCCTTTCCAA
>DN60458_c0_g1_i1	len=347 path=[0:0-346]
TTCATTCGGGGAAATATACCTTGGAAAGGTGTAGATACTGTCGATGTTGGAACTGAAGCAGACTTTCATTTTAAGCTGGCGAAGACCGGGGTTCAAATATAACCTACCTTCTCACCCTGATTTTGGAGGTCGACATCGGCTGCTTGTAAATTTTCGGTGGTTGCGCTTTATCTGCTCAATATTTCATGATTTTGCTGAGTGGTCCTGGGTTACCTGGGATACATGATTATGCTCAGTAAGTAGGGATGAATGGTAGAAGCTCATTAGATTGCCTTTCCATTCCTGGAAGAAAAGTCATTCCTACCTGGACAAGTGTCGGCTCATTGGGACCAATATTCTGACAAATG
>DN84345_c0_g1_i1	len=1137 path=[0:0-1136]
AGAGTAGTAACAGCCTATCTTCTAACCCACATTGCACTCGAACTCAAAACCCCAAACGCTGCTATATGGAAAAATCGAGACCACAGCATGACCAGGTTATGGCTCCTCTCATCCACCACAAGGGTCGAAATCTCGGGATGGAAACCCCAACGGCATTCACACCACCATTCTTCTTCCCGATTGCTTAGGAAATACTACTATGAGAAACCTTTATCTTATAAGCACTGGCTGGATCAACCAACCTTACTCCCTTCCGCCTCCCTTCTTTCTCATAATGTAGAAGGCTTCTATCTGCCCGAAATGAAGCATGCCTTAGTCCATGTCAAGAATCATTAAGGTACTAGATGTAGTCATTGTATTAGCTGCATGGGACTGCCTTTAAAAACCAGGCAGGAAAAT…
>DN84376_c0_g1_i1	len=217 path=[0:0-216]
TATCATAATTTTAATTTTAGTGGTTGCAAGGCAATTACAGTCCCTCTTTGGACAAGTGATGGCAAGTGATGGCTGGCTTACAAATGATGACTATTATTTTAAGAATGCGGGGCACGTTTGGGGAGAACTCATCTCTAAAGAAAATGTTTTGTCAAAAATTCTGGAAATTTTATAACTTCGTTATTTGACTATGTCGGGAGAAGCGTGTGGAATCAGG
>DN84389_c0_g1_i1	len=357 path=[0:0-356]
AAACTTGGTGGCATATTACCAACATTCTGCAAGGGAACATACCACTCTGCAGTCAGATACCCCAAATTTCGGAGCAGTGAATCAACATTACTCCACAAGGAAACTAACATCAAGTTGAAGGGGACCTACTTGGCAGAACATAAAGAGACATTAGCACCACAGACAGGAAGGGTGCTGTTAGATTATGTGGTTGCTCCTAGTTATTCTCCACTGATTACTTGACTGGAGAGATGGTGTATCGTTGTGAGCAGGATGCACTTGGGGTGAGAGAGAGAGTCTCATGTATGCCTGACAAGCAGATTCTCCAGCAGCATCAGACTCAGCGCAACATATATAACACATCATACATGCAACCCG
>DN84327_c0_g1_i1	len=246 path=[0:0-245]
GGGTGGTTCAATCTTCGTATGGGTTCAGCAGCAAAAGATAGACTATATAGCACTGACCTTACAAATGCACGTTGTGTAGTTTGCTCGGAGATGCATAACGGTTAGGCATGTTATGTGGATTTGCAAACTTGCCAAAACATTTTGGGTCTGGATTGCCGCTTAGTACAGGGGTGTCTTTTTCTCTCCTTCACATAGGAAAAGGAATTTTTTTGGGATCAAATGAATGATTTGACAAGTAGTAGCGGG
>DN84362_c0_g1_i1	len=261 path=[0:0-260]
TCCCGCTCCCAGTCACTTCCTTTGTCTAATCAGCTACCGCGTATTTGTTATTTATTTAATTCGCCACTCCCGCGAATGTATACTCCATAGATTCGTTTTAACAGTCCCGTTGGATAATTAATGAGGATTTAGCCGTTCATCAAACAACCTTGCTCCATTTTATTCATTATAAGCCCTGTTCCTTCAAAAAAACCGTTACACGGTACATTTATGAAGCTCAATTCATCACTGGAGATTTCATGGCTGTAGCCTAAACCACAG
>DN84348_c0_g1_i1	len=291 path=[0:0-290]
GGGAATGCATGATTATAAAGTTGGGGACTATACTCAAGTTTTCCTGGATAGGGTCATTGACTTGAGAATCTGAGTCAAGAAATTTCTCCAAGCTTCGGGCTTCGAATGCCAACCCCATACCTTTCCCCGCTACTGGTTACTAGTGAGACCAAACATAATAGACCTAGTTACGGGAATGGAAAAGCCTAGCTAGTAAGCTTGACTGTTTGTGAAGATTGGAGAATGGGGAAAGGAGATATACAACCCCTTAATGCGTGTTACACTAAATTAAAACATTGTGTTTAGCAAACT
>DN84358_c0_g1_i1	len=368 path=[0:0-367]
TCACTTATGATTGCATAGCTGCATATGTATTTTTTGGTTGTGATAGATGTTTCCTGTCAACAAAAGAAAGTGGACTTGTGATAGCAATTCTTTGCCTGAGCTGCAGGACTTTCTCTTGGTCAAATTGGCCTGGGACTTGCTGCTGGTCCTAACCACAAACCACCTGCTTATATGGGCACACCAGCCTATAAGGGACACACATGCCTTTGGGTGGATTTGAACCCTGAATCGAATAACACCACCCCTGCTTTATCACCAAACCAAATAACCAAATAACATTCATCTTAAACGTTTGACTTTGGTTGTTGAAATATTTCAGTCATTGGTATCAGTTTGGATCCTTTCAGTCTCGTATATTTGGGCATGGG
>DN84365_c0_g1_i1	len=439 path=[0:0-438]
TCTCAATTTCAGTTCATGGGACGCTTTCTTGGATGGTACGTTCGGTGGATGGTTGCAGATGGCATGGCAATGCCATTAAACAGTGAATCATTTACCTTTTTGCCAATCCACGTAGCCTTTATCGAACATTTAACCTTTTTACCTTATTTATTTAAGTGTTGTAGCTGCTCACTGATATGCATCCATACAATGTTAAGTTGGACATAGTATTGGATTGTATTGAAAATGCATAGAACATGAAACTATGCCCATTTCCATTGGCTTGGGGGTATTGCTATCAATCTACACAATTATCTTTGTAGTTAATAGTTAAACTTTGTCAAAACATAGTGTTAGTTGAGATTCAATTGGGTAAGGTGATGGGTTCAGAATAACACCCTTACACTAAGGGAATATACA…
>DN84306_c0_g1_i1	len=203 path=[0:0-202]
GTGGAAAGAAGCGTGCAGAAAACGTAAGGTCCTCTGAGCTTAGAAGAGCCCAGTTACCATTTACCCGTCTGTCTATAGTGTGTGGAATCTGCCCCACAGTGCTCTGTCTTCTTCATGTACTTGCTCTATTTGGACCTAGGCAATGAAATAGCTGGATGAATTCTAATTAATATGGAGGCTTTATCAGAGTTCCTTCCTAAAAT
>DN84343_c0_g1_i1	len=377 path=[0:0-376]
GGTTTCTGTGTTGGAGATCTCTAGGACTGGAAATGCACAGCACGGCTTGGGAGGAGCTGCTTCTAGTGCTGCTTTGGAAAGCAAGAGAACCTGTCGCTCGAGGGGATCTGATGATGTTGGTCATGGTCATTGCTGAGGTTCGAGTTTCTGGGTGGTGTATGCTGTTGTTTCATCTCTCTGTCTTCCTGTGCTGTTATGTAAATTCTACTTTATACTTGGGTCCTTCTGTTGAGTTTACAGAAGTAGTGTGTTTAGTATAAGAAGGATTTGCCGCCCTAGTGCTGGCAAACATTTTGAATGGTCTGATGATCTCAGAAATTTTGTATCAGAAAACTTGTGCAAGGGTTCTGGCCCACAACCCACCTTTTATTAATATA
>DN84351_c0_g1_i1	len=306 path=[0:0-305]
GGTCACAATACATGGACAGTATGAGAGAGTCAAAACTAGAATCAAAACAAAAGGGTACTCAAAGTATTATTAATCAGGCAAATTAAAACAAAACAAGAATGTTTTTTATCACAAGCAGTATTGGATTCCATTTAAGCGTCCTGGAGACATCAATAGCAGGGTAAAGAGCAGTGAAAAGTCCCCCTTGGTGATAATACTAACAAGAATGCATGGGTACTTGGCTGCATTTGAACGCTTTTCTGACAAAACTGACAGAAAAATCAATTTAGGTTTTTCACGAAAGCATGGGTACTCCCATCAATGTTG
>DN84353_c0_g1_i1	len=242 path=[0:0-241]
TTTAGAATGAGATATTTTGATTTACTATATTGTTTTTTTTTACCTTTGATGGCCGGTTTCTTTGATGGTTTTTTTGATGGCAGGTTTGGTTGAGATGCAAAGGGAGAAGACTAGTGTTGGTGAAAGCACTTCCCTGGTAAAAAGGGAGTGATAATTTTAATTGATAGTGCTTTTACTTGGTAAAAAGGGAGTTATAATCTTAATTGATATTTGGTGAAAGCACTCTCTTGGTAAAAAGGGAG
>DN84330_c0_g1_i1	len=489 path=[0:0-488]
ATCTCATTTTCTGATACCCTCTTCACTTTGTTAACAAAGGGAGATATATTTAGCTATACTGGGAATTGAGGAACTGCTTCTCCACTTTCTTTCACTACCTCGACCAGAGGTGCCTCACTCCCTTCATGAGAGAGGTTCTCTGGCATAGATTGCAGTCTCTATGTGCCCTGATCCTTATTGAGACTTCTAAGAGGATCAACTCCTTCAAGGTTGTCCTGTCAGATTGTGGCAGCAAATAGCATTTGGAGATTCACACCACCTTTCATTCCAGATCCATATTTGGTCAATGGATCTCCTGAAGAACCTTGAGGCATGGTGCTTTGGGGTTTAGGCAAATACCTTTAGTTTGATAGATGGATCAGCTCTCTTTCGACATATAGTACTACCTTGTAGGTTTGG…
>DN84360_c0_g1_i1	len=528 path=[0:0-527]
AGTCTATGATAAAATTCCTGTAGCTTTTTTCCACATCTCAACTAGCTCAAGGTAAAACCATAGTCTTCTTGTTGCTTGAAACCCAGGTCACTGTTTATCATGCTACCAATTGCACTTACTGGTGCACCTCTTTCCCCCACAAACTTTAAGTGCTGAATCAGTATGACTTAAAATGATGATTTATCCATTCCCTCTGACCTTTGGTCCCTTGCTGTCATATGGATAAAATAAATTATAGTGCACATACTCTACAATATAAAGGAAATGTAGTATGCAAGATCGCCTACTTAAAAGTAGCAGCACCTTCCTTCCTGTAGCTGCTAACTCGTCTTCCACAAAAGGGATGATTTCAAACCAGCAGTAATAACGGTGCCCTTTTCCTGCAAGAACAATCTTTAC…
>DN84324_c0_g1_i1	len=202 path=[0:0-201]
GGACAGAGTGTTATCAGAGAAGGAACCCAGTACAGCCTGCATGTACAAGGTTATCCTGAGGGGGATCTTAATTCTAAAGCAGGGCAATAATCCTGGGGATCTTAATTCTAAAGGAGGGCAATAATCCTATTTCTGATACAACTAGCATGAAAATATATTAGGAAAGCAATACATTTTTTCTTAGTTAAGTAGGTGGGATTAC
>DN84396_c0_g1_i1	len=276 path=[0:0-275]
GCTTTCACATAAAGAATTCACTGGAGAGGCATAATTAGTTGGATGAATTGCTTCCATTAGAATTGTGTACTTATGAACCAAAAGCACACCTAGTGGAATTGATGCAACCTCCCCTAGCAATATTGGATTTCAGGTTGGGATGGCTCCTAGAGTGCTTCTAGTGGATAATATTGTTCGATCTTGTGATAGAGCCTAGAGGATGTTAACGTCTACAAGAAATGAGCAACATTAATTAATCGCCCATCCATACCCTTGACTTTGCTATTGAGATTATCA
>DN84367_c0_g1_i1	len=295 path=[0:0-294]
TTTAAGGTAAGCAACTGGGTCTCGCTAAAGAAGAATATTAGAATCTTCCTATTGATCACGAAAGACAGGATTTGGATAACGAAGGTATGAATCACGATCATTAGGAGGAACTGCTCGATCTCATCCTGTCACTTCACTGTGCCTGGGTTGAAGCTAGCTGTTATGCTGCTAGTTCAATAGGTGTGTTGGATCACTGGTATTAGAAGTTGCTGCTACTACTGGATAAGTGGCGACTGGATCTGCTACTGCCTGATCCATTAGTCATTCTTTTTTGTTTTATTCTATAACTAGAGGA
>DN84333_c0_g1_i1	len=221 path=[0:0-220]
ATAAAATTAAGTCCTACAAAATTGGCATGAAATTTTTGAGCAGTCCATGGCATTGTTTTAATTACTTTCAGTGAAAGGTTCAAACCCATGAAGCTGAAGGTATATATCTCTTTATGGACTATGGGGATTTTTGGCTGCAACAATAACATTTTTCAAAAGCCACTTTTCACTGACAGTTAAGTTAAAGAAAGTTCTATAAACTCGTAACTGATATTTTTCCA
>DN84347_c0_g1_i1	len=254 path=[0:0-253]
TGCTTTTATAAGTTACGCTCTTTAAAACCAATGAATGGGGTTAAAAATCTACAATAACTTCTGATGGTAAAAATTACTAATGCGTTGAGCACTTCGATACATGACACTAAATTTATAAGTTATAACACGTGCCCCAAAGGAATGCAAATTCAGAAGGTATTATTTGTTCAAGGGTCTGATAGAAACTCACATACAGTGGTTTCGTTCAAAAGCCAGGGTTCCCAAATAGAAGTTTTTAGAGAACTACAAATTGA
>DN84313_c0_g1_i1	len=505 path=[0:0-504]
AGGTAGGACGTGGTCAGGTAGCTGGTTCTGTATTAGACTGTGGGAATACTTTTTCATTAAAAAAATATCAATCTAAAGGACAAATTGGGTTCAGCTAGCAGGCATCATTATTTCAATCTGATTTGGCAAATTATCGGACTATAGTAGCAAGGTTGCCATTGTTATTATTATAGGTGCAATGAAATGAAGCACACAATCACTGGTGAGAAAAGCACATCCAAACACTGCTGCAAGAAGATAGTGATGATTGTTAAGATTATGGTTTTATATAGTGATGCTGCCTATGAAAAGAATGATGAGAAGCTATTACAGTATTGGATGCTGGGTTGAACATGGTGATACTAAAACTAGGAAAGGTAATCCATGGCCTTCACTTGATTGGCTGCCCTAGCCCATTTA…
>DN84364_c0_g1_i1	len=260 path=[0:0-259]
CTCAAATGTCAAGAAAAATATTCTTTATGACAGTCCTAGAATTACATGATAGACCTTAGGGTTTTTGTTATGATTTTCTAGATCAAGGTTTCTTTGTGCATTTAGGCAATAGGATTAAGGTATTAGAATTAGGGTCAAGGTATCATCATCATGAATCTAGGCATTAAGGTTAGGGCTTATTCATTAAGAGCAAGGACAACATCTAGAGTTTCTTAGGATATCTCAAGTGTGTCATGTATATGAGGTATATATATATAGAG
>DN84346_c0_g1_i1	len=410 path=[0:0-409]
ACAGAATTAATTGGATCCACACACTTCCTGGTGACCTGATTCCATGGTTTGTCCCTTATTATTACAAACTTTAGTTCTTACAAAGGAACAAATAAAATTCTGTTCACAGAATTTGTGTTAAGCTTTTTATATTGATCTGCACAAGGTGCTTCATTGCTCAGCTTGTACTTTTTTGTGGGAATTGATTTTCCCTCTTTGGTTGCTCTCGTAGGTAGGAAAAAAATATTTAGTGGATAAAAGTTAAAACTTTCAACTTCTTTTTACCTCAATTTCCGCAAAGCAATGCCAGCATTTAAAAGTACTAAAATTTGCTTCTGAACCCATATGGATTTTTAGTAATTAAATATGTTTCATATAGTTTTGCTTAGCTTCTGTAATTAATATTTCAAGGGTGATAAA…
>DN84331_c0_g1_i1	len=266 path=[0:0-265]
GGCTTCTGAACTGAGTCAAACCAGTAGAGAGCATGCACAAACCAGTATATAATAGCCTGTGATAGAACAAGTGCGAAAAAACACCATCTGCAGGAAGACATATACCGGTGTGGAGCCGGTAAAATAAGGCAAATGTTCAATGTCAATCCCCACAGAGGACACTGTAAGCCCAGTGGCCAGGCATACCCTAAACCTCAGCAATGACAGCCCATACTTTATCAACAAGGTCTGGAACTATGAGAGGAATTGCAGAGACAGTCCATCGA
>DN84370_c0_g1_i1	len=432 path=[0:0-431]
AATTCTATTCGTTAATTTAAACTTGATTTTGTTAGTGCATTTTCATTTTGAGGCTGAAGAAATATCAATGGACTTCAATGACAAGTCACCCATGTCGGATGGGAAAGAAAAAATCCTTCTGGTAGTAAATTGACTAACTAAATATGCACACCTCATAGGAGTGAAGAAATTAGATTCAACAAAACCAATTGCCGAAGTGTCGTACGAAGATGTTTACATGTTACATCAATTTCCAATGATCATTGTTAGTGGTAGAGATCCCAGAATTAAGGGAAAATTTTTAAAAGAATTCTTCAAACAAATTAGAACATCGCTTAACAGGAATGCGGTGTATCCAAACCGAAATTGTAAATAAATCTCTAAGAGCATACCTCCATTATTTTGTAGCTAAAATCTGCT…
>DN84322_c0_g1_i1	len=278 path=[0:0-277]
TGGAAATTCAAAGGGCACAGCTGGCTGACATCCATAGCAAATTTCAAACGGCGAATAGCCCGTGACAGAATGGAACACTCGTCATAACAGTAATACACGTTGAGAAAAGACTTATCCCACTACCAAACTTTGGCATAGGCTGTCCTAAGCAATTGAACCAGGGTGCAGTTGACTACCTTCATTTGGCCATCAGTTTGTGGGTGGAGAGCAGTAGAAAACTGCAACTTGAACTAACAATTGCCATAGTACCATCAAAAACTGGCTGAGAAAGTGTGCAA
>DN84320_c0_g1_i1	len=230 path=[0:0-229]
GGGGCCATGTGTGCTTTTTGGACTATGGAGCCTCTTTTGGTAGCTTTATTGGCTTGTCCTCTAATCTAGTTCACCATTGACAAATTGCTTAAATATTTTCCTTCCAAAGCCCCTCATCAAATAGACTTCTCCACAGTTTTTTTTAGTGCTAAAGCCTTAACAAACTAGGTTAGATTTTTAATTCCCCAACCTCTTGGAATTTTTGGGATAGATAGTGATGACCAATTGGC
>DN84373_c0_g1_i1	len=335 path=[0:0-334]
TTGGCCACTTCTCGTTGCCGACTCAACAACCTAATTCGTATAACTACCGTTGATTACAGTTACAAAGCAAAAATTCTAGGAAATTTAAGATTGACAGTTCATATAAACCATCGTACCCTACTATCTGCTGCCAAATCACAATTGGTACACGTTGCAATCCTATTCCATGCTAGGCATCGCTATGCATACAACAATAATTGTTCCCTTAACAAACCGAAAATTTGTCTACTGTACAACCAACTATTGAAATCTGTAAAACCGCCATTCACATGTACAACTATCGACATTCGTTGCCCCTGTTCTTTCGAATTGGCACTACCCTTCATAAGATATAA
>DN84335_c0_g1_i1	len=286 path=[0:0-285]
AAAACTATTTCAGCGCTACCGGGTATCGGATTATTATTCAGAAGAGTTGATAGATCACTACTTCAGAACCCATTAGAGAAATCCATCCTTTGCTGCTGGTGATAGCTCATTTGACAATCTATCCGGTGATAGCTTATATGAGAATCCAATGACAGCTTCCACGTGAAGTGATATAAGTTTATGTACTTGTGACGACATGTCAAGCAATAAAGGCGTCTCAACTTCCATATGAAGAGAGAAGAGTTCATCTCGCATTTGTATAATTCTGGCATCTTCTACATTAAAG
>DN3023_c0_g1_i1	len=541 path=[0:0-540]
TATTTTCTTTTGCTTGGCATATCACTCATCAGAAGGGCCATCTTCGAAGGCCATAATTTTCTCAAAGGCCATAATTTTCTCAAACAATGTTGGCTCACATAATCTGTCCATCATAACCTTTTGTGTTTAATCTACCTGACAAACTCAATTGAAACCCTTAAGCAGTTGTTCAAAGCAACAATCTGCATTTCTCAACTATCCTGACTCATATAATCTGCCCAACATATCCTTTTGTGCTAATCTACCTGACAAACTCAATTAAAATCCTTGAGCAATTGTTGAAACTAACAATCTGCAATTTACATAGGGCTAGGGTTATTGTAAACTTGTTCAGAGTTGCAAACTTTCAAGATAATGTGTTTATCAGTCGGTCATTCTAAACCAGAAAATTGTTGTTCC…
>DN3038_c0_g1_i1	len=293 path=[0:0-292]
GCCATGGATTTTCACATCAAGATGGGTGCTATATGTGAGACTTTTGTTGATGCTTTCATGATGTACTCCAAAGTGTTTTATTTTTCAGTAAGCTTGTCCTCCTATTATGATTTCAGAGTTTGGCATACACATTCAATTTGTAATCGTGCCTCTAGTTTGTAATGTACATTCAAATATAAAATCTACTTGTTTAAAATTTTCTGTCGTCCATGAGAGATGACCCTGTGTACAGGGAGCATCAATAGCAAATGCCATGTTCGTCATGACATGAACAATTGTTGGTCACAAAAACT
>DN3062_c0_g1_i1	len=233 path=[0:0-232]
TAATCTAACAAATGTTCAGTACCTCAACGTGCGGCGTAATTTGCTAACAGGAAGCATACCCAGCGCCTATGGCCGCTTAAAGTCAGTCACCAGATTTGTGGCATATGATAACGATTTAAGCGGAGGGATACCCGGGGAGCTGGGAAATTGCTCAAGCTTGGCCCAGATTTGGCTCTCCAGAAATCGGCTCAGTGGGCGTATACCAGAAGAACTTGGCCGCAGTTTGACGCAGG
>DN3017_c0_g1_i1	len=321 path=[0:0-320]
GGTTTGGATAGTGGTGTTGAGTTCACATTAGCCACTTGGATTTTAATGAACTGCTGCTAGAGCTGGTAAATTTTGATGATAATGATCCTCTTAGAAGGGTTCATCCTTCATGCAACAGATGCACATCTTGGATTGGATATAGAAGAGGTTGGAGGAAAGCTCAGTGGTAGTGGTGGTGATTTTGACAATTCTGAAATGGTGGAGAACTACTGGGAAGGACAAGACATTATTCTGTGTTCGATTCTAGTATCTGCCCTACTTTGGAAGTTTGGACTTGGCATTGTTATTCCCATCTAGAGTACCAATGACTAAGTATCTATG
>DN3046_c0_g1_i1	len=297 path=[0:0-296]
GTGACTAGGTAGGAACAAAAGAAAAGATATGTGTGTCAGAATAACAAGAAGAATTTCTTTAAAAACAACCACGAGGAGAATCCCTATAGAAGTTGCAACACAATCCTGTAATACATTTATGCCTCTGTCCTATGATGGTAGCCCAATCTTCGACTCTGTAATGATAGCCCAGTAATGATTTCAGACTTCATATCTGTGTTAGCTTAGTAGTTTCGGCTTGTAGCCATATAATCCTCTCATCCGAATTCCTTACACCGTATTGTACCAAACTTATTCTCTGAAATTCTCCGAACTTGT
>DN3087_c0_g1_i1	len=980 path=[0:0-979]
GGGTGATCAAATATATTTCCATCGAATTGCAGGCTTTACTGGAAGCAGATCAATTCATCAGAGCATCCCCAGCCTAAACGTTAACTCTGTAATAGAGATGAAATTCTCAAACATCCATTATAATTCTGTTCATTTGATAAATCAGCCTGGTAATGGGTGACTAAACTCTGCAACCAACTCTTCCCTGATTCCATTTCTCCCAAAATCACCGTGTAAAGAGATATACATGCTTGAGCCATTGAATTCCACACAACATCACAGCTTGCCATTGAGTTCCACACAACATCACGGCTTATCGGCTATATGGAAAACACAAAATGATGTTATGTATGCCACTGCATGCTAAAGCTTTTTTCAGGCACTTTAATTCAATTATTTGTGCTAATTTGCATCTGCAGG…
>DN3014_c0_g1_i1	len=283 path=[0:0-282]
AGAAATTTAAGCCTAATAACCTTAATATCTTTACATTAAAGTTAATGATGTTTGAATCCTGTTCCCATGTGGGCCCATCCTGCAATATAGACCTCCCTGACCTTTTTCTGGACCCTGTTCTATCTCCTGTCCATATATCAAACTCCTTACTCCTATTTGACTCCATCCTGACCCAACTGTCACAACAGGTAACTCACCATGCAGATGGCCCTACCTCTCAGGAGATGGGTTTTGTGATGTCTGCTTTCACAAGTATCTCCACCAGAAATTGAAATTGTTAAAG
>DN3032_c0_g1_i1	len=245 path=[0:0-244]
AACAAGTTCTAATTAGGAATAGTAATAGTAGTTAGAGTCATTAGTCACTGAACAATAATTTACTATTGAAAGAAACAGACAAAAGGAAACAAGCTAGCCATAGAGAAATGTCAAATATGTAATGACTGTTGTAACTGATAATTGAACAATTGACAACAGTTATCCAACTGCCTGGAGACAATGTACAAGAACGAGGAAAAACAAGCCCAGAGGGGTTGAGCAGTAAGAAGGAAAAGAGAATAATA
>DN3091_c0_g1_i1	len=291 path=[0:0-290]
ATTGTTTAACTTAACTAAACTTCATATCTTAACTTCATAATGTTGCAATATCACTTTATCAAATAGACATTATAATGTCTAATCCATCCCCTAAGAATGTTTATTTTGTTTTCCATGACTCCTAACAACATTTGGAATGTCTCCAGCTTGTTCATCTTCAGTGCCTTGGTGAAAATATCCGCTACATGATCTTTTTTTCAGTTTTTTATTTTTTCCCAGAGAAGATAATTGCAATTTCTATTGTGTGTGTGTGTGTCTATACATATATATATATATTATTTTTTCCCAGAG
>DN3090_c0_g1_i1	len=204 path=[0:0-203]
GTCCCATCAATATGTTCCACATGATCAGCTCAGTTTCTCTGTCACTGTTACCGAACCTCTCACTTTCCCCATTAGTGCATTGATGATCCGAGGAATTTCCCTAAGTTGTCCTGCGGATCCAAACTTTGGTTCAAATATTGGGAATTTGCAGTTGAATAGTTCAGATCAGTGAATAAACGCACGAGGAATTTCCCTAAGTTGTCC
>DN3082_c0_g1_i1	len=249 path=[0:0-248]
ACTATTAGTTAGATACGTGTGAAGTGCGAAATTCTAGAACAAGTCAATCAAGTGCATATCTGTCTCTGAAACACACTCAGGTTGCCACAATTAAAAGGAGTGGATTGGGTTAAAAATATATAAATATCCATTATATTATATTCGAGATGAAGCGAATGCATTGGGACAAAATTGCGAAGAACTCGAAGTCTAATGGCACATCAGATAGTTAAGCGAGAGTGAGTATGGAATAGTTTTTGAAAGAAGCTG
>DN3033_c0_g1_i1	len=216 path=[0:0-215]
ATATGCAGGTTCTCGACGAGCTGAGCGTGGAAATGGTGTGAAGGTTGAATCGATTTGTAGGTGAAGACGCATGCTGCAGAAGAGCTGGATGTGAGAGAGAAATGTGTGGGAAAAACAACACGCTGGCAGAGGAGGATGTGCGGAGCTGTAGCTTCAATTTTTGTTTGCAGGCAATGGATAGCGGCGTTGAGGCAATTGCAATCAAGGAGTTGGCTG
>DN3029_c1_g1_i1	len=608 path=[0:0-607]
CTGTTAAGAAATAGATCCACCGAGATGAGATACTATTCCTCACTATATGAGGTCCCTACTGTCTCATTTATTCTGAGACTGTAATGGTTACTGTAGCTCTTTGTTATGCAAGGATTGTACCGTGTGTCCTCAGTGGCTAATACACTAATGATTATTCTACTATGGAAGACATTTCTAACGTAATAATACTTTCTAAATTCCTTTGAGGAAAATTCCTCCATTCAGTGAATACTCTAAGCTCCTCTAACAATGGAACATTATTGTCAATGTACATTAACATTTTGTTCAGTGCAGATAAATAGGAAAATACATCTCTAGCTAACCCACGCAATATTCCGGTTGCAACATTGTTTAGCATTTATGGAGGATAGCAAGATCAAAGCATTTTCTTCACGAGTC…
>DN3029_c0_g1_i1	len=244 path=[0:0-243]
ATCCCCTCGTACTATAGTACTGAATTCCAGAAAAACTTAATTAATATATATATATATAATGCCTTAGACATATGATACTCTAAAGCTATATATATATACGATACTCTAAAACCAAAATAGCTTTAGACCTATATAATGCTTTAAAGCCAAGATCCGTTCACGTCACCAACATATTATATAGAACGGCTTAGACATATGATACTCTAAGGCCTAGAGCTATATATATATATATATATATATATAT
>DN3080_c0_g1_i1	len=898 path=[0:0-897]
GGACAGTCTTTTCTCCATCTTACTCTTCACAGGTTTCATACAATTATGTAATTTAGGGAATTAAATAAATGAGAAATGAAGCAATTTGTATTCCATTAGTTAGATTATTTATAGCCCTAGGACTGTAAACAAGTTCATTATTGGAATGATACTTTGTAGTTGCAAACTATTAACCAGAGTCGTGTCATACAATATCTCATTGTATAGTTTTGTTCTTATTAAAAAAATGGAGTTTGTAGCCCAATTCTATCACACAGTATTTATTTAATTTATGAATTTCATCTATTCCTCAGATAGCTATTAATTTGTCGTGCCATAAAGCAGTGATTGTGTATTAAGATGACCCTGTCATAGTTCTGTTGTGGTTATCTGATTCTTTGGATCAAACACGTATTAGAG…
>DN3026_c0_g1_i1	len=977 path=[0:0-976]
GTTCACAAAGGATATTTGAAGTGAAGGCATGACTCTTAGTATATTGGCCATGACTTTCCATCATTAATTAATGGCCATCAACTGGAACACGGAACCGCCAACAGGAATATTGGCATTATGGATAACTGACATCGGGAGTTTACTCTGGTTGCAGAATGAGAAACGAAGTTATCCAGTTAAACTCCCAGTTGAAACAAGAACTAGGATTATCTTCTCAAAAAATAGGTGTTCTTAAAAGTCAAAGGTTCCAAGGGAGCACAACACTTTTAATATGTTCTGAATGATTAATTATATAAGCCTCCATGCAAAGATATCCTACTAAGTTTGCTAGTGACTGGAACATTATGTTCCATGGAATCTCAGTTTCCTACAGCTATTATAACTAATGAACTACATAAC…
>DN3002_c0_g1_i1	len=257 path=[0:0-256]
TGCTTGCTTTAAGAAATAATTCTGCAGGATTAATGCTCCACAGCATCATGCCTAGTTTCTGGGAAGGAAAACAGCAATGAAGATACTTTCAAAAGGATATTTCCTTGCTGCCTGGAAGTCATCATGAATGAAGTTCTCAAGTCTCATCCTCCTGTGTATGTGGAAGACGAAGTGTTTCCATCAACAGAGAACAAGACAGCTCTGAAGCCATGAATTGCAAGTTCAGTATGTTTCTCAGCTGCCACAGTTTAAGAGAT
>DN3096_c0_g1_i1	len=546 path=[0:0-545]
TGGGAAATTAACAGGCAGAGGCTTGCTGACTGTGATGAATGATATTTCCAGAGGTAAGCCATTGTGGATGATAATGATATTTTAATTAAGCAAATTCAGTGAAGTGCAGACTAATTGGTTTTTGTGGCGTTTAACTTTCTAGCATGTGTAAGGTTCAAAATTTAGTGAGAGGGGTTAAGGATGCACAGTTATTTTTAAAGAATTAAATTATGCTAGAAGTATCTCAGTTAGGTTAGACTCACACAACTTGGTGATACTTAGTGATAGGGGTTTAGGATAGACACTACTTTAGTGAAAGAGATTGAGGATGGAAATTATTTTTTAAGAATTAAATTATGCAAAAGGTATCGATGGTGATAACATCTGTGAGCAATCTAGATTATCAACTGATCTGCCAGC…
>DN3050_c0_g1_i1	len=330 path=[0:0-329]
AATTCAGCAGTGCCTCCAATATCTCAAATAAGTTCAATATTGTTAAAATGGTAAGGCAGATTTAACAATTTATATGCTGAGCCTTATTCTGTGAATGTAGTTTATTCATAATCCATCGACCAATGACATTTTTTAGAGTTTGAGATCCATTTTGTGGGACATACTTTGTTTGTATTCTTCTGGGGTCTTAAAACACCGTTCACTGGAAAATTGCTCGTTTACATCATTTGCTGTCTATACCCCCACTTGGATACTTTTGATTAGCCTAAACCAGAAGCTTCAGCTATCGAGGCTTCTAAATATCCAACTTTTATAGGTGCCATGTTGCAG
>DN58683_c0_g1_i2	len=276 path=[2:0-142 12:143-275]
CCAAGAAGAAAATGTACATGCATGCAAACATTCATTTCGAAAGAAAGGAAAAATTGCTCTCAAGCCCGCAGATTCCAAAAAGAGTATATAGACACGTTCGTAAAATCTTGGAGAAACGAGACGAATATTTACGCACCAGTCTTTCTGAATATCCTGAGTCGACCGAGAAAAATGGGCATTTTGCACAAAATTTCCTTAAATCCATGAAGAATTGGCAAATTAAAATGCTACTTCAGTAAACTTTCTAGAACCGTCTGATAACCTGAGAATCTAAAC
>DN58636_c1_g2_i2	len=429 path=[0:0-327 5:328-428]
GCACACATATCCTGATAGACTGTTATAAGTTGGAGAGCCCTAAAGTACAAGTTTGCTTTTAAGGAGTTTGCTTTTAAGCTGTGGAACCAACGAGGCCCTTCTTCAAAGGTTTGGACATGTTTTGAGCCTGCCTAGTCCTTTGAGAGTGATTTCATGATCATCTTGGTTTTTAGATTGGGTAATTGCATTGGAGTGGATATCTGTGATGATGTCTGAGTATTGTCTTTGAGGTTTAGTTTTTTTTTAGTTGGACATCCTTACCTTTTTGGCTATATGTTTCCATGCCCTTGTCTGTTGGATGTTTTGCACACATATCCTGATAGACTGTTATAAGTTGGAGAGCCCTAAAGTACAAGTTTGCTTTTAAGGAGTTTGCTTTTAAGCTGTGGAACCAACGAG…
>DN58636_c2_g1_i1	len=284 path=[0:0-283]
AGTGACTTCACAAAGGTTTGCCTGAAAATGCCCAAAATCACATCAGATCTTATTTTCACCCTGACAAAACTCAAACTAAAAGAACAGTATTTGCTTTTGAAATCCCAAAAGCTGCTTAATCAAGCATTGTACGTCTCACTTATTATAGTTCAGAATTCTCTAAATCATACAATTAGATTTGTCTAAACCTGAATTAATTGCATTTCTACATAACAAAAAGGTTAAAAACCAAAGAACAAATAAATGTTAGGCTGTTAATACCTGCCCTTTGGGTTACTGCCTTT
>DN58690_c0_g1_i3	len=278 path=[2:0-221 3:222-223 4:224-277]
GTTCGAAGTTATATGAGAATGAGTTTAATAAAAGTGGCGGCATCAATCAATTTGTTAGCGAACAGTAGTTTTAGGGTCAAGTTAACCAAGCTATCAAGTAAATTAATGACAAGAAACACGTACAGATATAAAGAGCAGGTATTTAGGAACTTCAAAAAACATCACAACCACTCTTTCCATGCCCACCAAAAAACATCATAACCACTCTTCTTGTGCCTAATTCTGCAGCAAGCAACAGATAAACTTTAACATTCTTGCATGAGTTCAGAGATTATCTA
>DN58607_c5_g1_i1	len=270 path=[0:0-269]
GGATAGCTTTGAGTAAAGATAAATAAATAAAGTTAAATATCTTGAGTGTATACCATTTTATTTAAAAACATAAATAAAAATAATAATAAAATATATTAAAAAATATGATAAAAATTCACATAATCGAAACAAATAAGGACTCCCATTGGTGAAGTAGAATTAAAGGACAAAAATTTTAAAAACCAGTTGCCTTTCAGGTTCTTAAGGTTTGCTGCTCTAAGATGTACTAAAAATGAAATATATTTAAAAATACGAATGTATTAAAAAATA
>DN58607_c2_g1_i2	len=857 path=[0:0-247 2:248-266 3:267-336 5:337-342 6:343-418 8:419-463 10:464-494 11:495-856]
GGGCTGACCTTGGCGTCAAGCAAGGTATTTCTAATGCTCTAATTGTAAACTCAAATTTGATGGGATTAGAAGGGTAGGGCTTTTGCCCGTTACAGTTTCCTTTTGGATTGATTGCTTGGTTTTGATGATTTTATGGGGTTTCTTTGAAAAGAATAACACTACCTCTCCCGAATCTGCTAGGTGGTTGTAAAACCAAATCAAGGGTATTTCTAGTTCTCCGTTCTCCTCACTGTGAGGCTGGAGTTGGACTCTTTAATTTTGTTAGACTCTATGCTACATGGAGGGTAGCCGTGCTATCTCTAGTGGTGGCCAGGTTATCTCTGGCTCTTCCGCTGCCGTCTCCCTGTTTTCGATTTATATGAAACCCTCTTCTGTGGTTCTCTCCGTTTTTTTTTCAGA…
>DN58607_c2_g1_i1	len=868 path=[0:0-247 1:248-266 3:267-336 4:337-342 6:343-418 7:419-429 8:430-474 9:475-505 11:506-867]
GGGCTGACCTTGGCGTCAAGCAAGGTATTTCTAATGCTCTAATTGTAAACTCAAATTTGATGGGATTAGAAGGGTAGGGCTTTTGCCCGTTACAGTTTCCTTTTGGATTGATTGCTTGGTTTTGATGATTTTATGGGGTTTCTTTGAAAAGAATAACACTACCTCTCCCGAATCTGCTAGGTGGTTGTAAAACCAAATCAAGGGTATTTCTAGTTCTCCGTTCTCCTCACTGTGAGGCTGGAGTTGGATTCTTTAATTTGGTTAGATTCTATGCTACATGGAGGGTAGCCGTGCTATCTCTAGTGGTGGCCAGGTTATCTCTGGCTCTTCCGCTGCCATCTCTCTGTTTTCGATTTATATGAAACCCTCTTCTGTGGTTCTCTCCGTTTTTTTTTCAGA…
>DN58695_c1_g1_i1	len=430 path=[0:0-429]
GTCTTATAATGATTGTGCAAGGTAATGATCCTGCATCTGGGATTCCCATTAGACTGATAGACTAGATTTGTATTTTAAGTATCCATCATTACCTTCTAGCTCAGGCAAGCGACCTTATCTTTGCTATGCTTAGGTAAACAGCTAAGATATATCCATAGTGCAATTTGGGATAACCTTGTCTTCAAGGGTCCTGAAATGTGGTAAGGTCTTCATCTTATCTACCTGAGCATAGCCAAGGTAAAGGGTCTAACCTGACTGAGCTCTGTCTAGGTAAGGCTTTCGGAAACCCACATTGGCACAGCGAAGATGAGGTTATTTGTTTAGATCAGGGTTTCTCCAGGTATTCTGTTGAAGTGTTATTGGGGTTCTGAAGCTTTACTTTTGCGTTTCCTCTGTTTT…
>DN58613_c0_g1_i5	len=471 path=[0:0-249 2:250-285 3:286-286 4:287-428 5:429-470]
CCCAAATAAGACTCCCAAATAAAAAGTCATAAAAACTACTTAGAGAGGAACACATAATTCACTCGACATCAAAGTTCAGATATGCACACTTGAATCTCAAAAATGATAAAATCTGCTTAAAAGTTCAGTAAAACCTTATTATTAATTAAAACCTAAGGTATGTCAATAAAACTTGAACTTAAATAAAGAAGTTATTATTAAACCCTCCCCATTACCTAAACTACAATAGACCAAAGCTCATCAAAACCCTTGTAATGGTAAAAAAAAAAATCGAGTAAGATTCGAAATAAGACGTCATTAGAAACTGCTCACAGAGGAACGCATAATTCATTGGCCATCATTAGAAACTGCTCACAGAGGAACGCATAATTCATTGGCCATCAAGTTCAGATATTCACG…
>DN58685_c4_g2_i1	len=364 path=[0:0-363]
GCTAGAGTTGCCATGAATATGGGCACTTCAACTGTGACTATAAAAAATATCACGTTGGAATTGGAGAAGGAATGACCTCTACACAAGAAAATCAATGGTACACCCAAAAGAGGGGGCAAAATCAAGGGAAATGTGGGATCAATAACTCTAAATCTTATTGGAAGTCCTTCTTGGCAAATTAGATCTTTTGGATGTTACTAAAAAAAAGGGAATATACTTGGTCCAATTGTCGAAGCAGTTCTGAGCACATAGTGGCTCATTTGGATTGCTTCCTCATTCACAATGATTGGCTAGTTCTCACTCCACCTCTTCCTAGCCCATCCTCTCCCTCTCACCGCAACCCTAACCCCACCTCGCGTTCCCA
>DN58629_c0_g1_i1	len=286 path=[0:0-285]
ACGCAGAGAACGGATCTGCTTGATAAGCAATAACACGCAGCGATGAGCCTCCACGCTCCATGCCGCAATGAGCCTCCACGATCTCCACGCAATGGGTTCTGCTCGCCTTCACACAGCAATGAGCTTCTGGGCACCTTCACGCAACAATGGGCCTCCACAATTTTTCGCTCTGGTCCACATGTAGATTGCCCTTTTTTTTTCACACACAGATTGCTAACTCAACTCAACTCACTAGCTCTGATACCAATTGTAGTTTATGGAAGTTACAAAACAAGAAAGAAATGAA
>DN58641_c1_g1_i1	len=409 path=[0:0-408]
TTCACATCATATGTTTCCACACCTGCAATCAAGGTCGTGATTACTTGAATAGAATATTACACGGTCCCTACTTCACTCTATGATACATTATAACACACTGCAGCTTCAGTTAAGTCTGGACCCTTTTTAAATGGAGAAGTAACATGATACAAGTTCAAAAATATAGAGAAGTTTACCACTGTATTTGATTGAAAAGAAGTCTATTCTAAATTTGTGACCAGGACAATATTAATAAGTTATCAACAAAAATCTGTATTTTGTATCCCAAATATAAGAAATTAAGAATCAGCTTACACGTGGGAACTCCATAATTTATATTTACCATGAAGCTTGCATGTTGGCATAAGTTAAAGCATAAAAATGGTAATAAACATTTCATAGCAGTACCTTCCATTTTAT…
>DN58606_c1_g1_i1	len=3797 path=[0:0-3796]
AGGACACTGTAGGAAGTGTCTCCTATAATGCATTGAAACCAAATTGAATGTTAGTTTTGCAATGGAATTGGATAATCAAGCAATAATTAATTTTTCTTTTAAGTTTGAACAATAATATCTTATATAGAATGCATGATTAATTTATTATATTTAACCTTCATATTATGGCTCGGCTATACCTACTGACGATAGACTTGCTCATACAGACCACAAAAGTCCCAAATTAGTGTTAAACCATTAACAACATATTAAACAGATGGGCAGTATTTTAGCAAAACCGCTCAACAATATCTAGGGTTTTATAGATATAGCATAATAATAACCAAGGTGTATTGCAAGTACCGGGACTTGGCACTTTTCTTGCCTTGGCAAGGGTTCAAATCTTATCTAGGAAATTTA…
>DN58606_c2_g1_i1	len=230 path=[0:0-229]
AATAGTATGCGAGTCCATTACTGATGTTAAACAAAATGTCACTAGTTTTAATTCAAAAAAAAATACAACTTTTGAACATGGAAAGCAAATCGAGTTCTTTTAAGCAATATCCTAAATTTATTTTCTTACAATAATAAGAAACATTTCACTAATTCATATCAACTGGTGAATACCAGTAACTAGCCTTTATAGACCATGTCACATACCTGAACTAGGTGAAGGTGTTTCAT
>DN58687_c0_g2_i3	len=488 path=[0:0-268 1:269-326 2:327-487]
GCATACCATTCTGCTTAACTCTCAAAACATTTCACAGACGGCTATCTATTCTTAATGCATATCATTCTACTTAATAAGGAACATCTTTTCAGAAAATTATTTTATGGGACTGTTCTTAGGGCCTGAACGCCTAAGCGTCTCTACTGTGAATTGATTTGATTGGCACTGGTGTCTAGCAATTCCTGTACTGAGCTTTGATTTGGATTTATACCACCAGTTTGTACCCTGATGTCATTTTAACTTCTAAAACAAAAAGATCCAGAAATATCTGCCAGTTGATGCAAATCCAATTATCCATTATTCCATGCCTACCATATATTATGAGCCTAATCCATGGAACCGATAACGCCGAATAGGACATTGAAAAAAGTAAATAGAGCGCGCACAGAAAATTTGTTT…
>DN58674_c1_g1_i1	len=481 path=[0:0-480]
CGGCAAAGGAAAATCCATATATATCAAGTACATGAATTAGAAAGGAAAAAATAAAACTCAACAGGTAGTGTCTAATTTTAGATATATCGTAAGGCCTTGTTTTTATAATCCTAAGCAAAACTTAAACTGAGTGAGATTATCCACTGGCTGGCATCATTCAATGGACTAAATGAATACAATGCTAGACTTCTATCATCACTTCTATCCACCAATGTTAAAAGTCTGAATTATCAAAACTGTGTTCATTTCCCAGAAAAGCAAAATACCAAGAACTATCATGAGCCAAACAGCACAAAAATCATAGCTTCAAAACCCTAAATCCTCAAAACCTCTAACCTGCAAAAACCTAAACCTGCGTGAAACTCCAAGTGCAAATTTAACAAAAATTCCAATAGGAAG…
>DN58642_c1_g1_i34	len=876 path=[1:0-33 19:34-74 20:75-237 21:238-239 22:240-875]
AACCTTCAGCAACAAGAAGGATGGGGAGGGAGGGAGGTGGCAACCTTCAGCAACAAGAAGGATGGGGAGGGAGGGAGGTGACAACCTTCAGCAACAAGAAGGATGCAAGCAACATTAAGGTTCATGGAGGGTGAAGAGGGCCCTCCTTGTAACAATCCCACCTAATAACATCCATGCAACATTAAGGATCGTGGAAGGTGAAGGGGGTCCTCCTTATAACAATCCCAGCTCATAACAACCATTGCCAATTTAGAAGTGTCATTTGCAAGAAGCCTAATAAACATGGGATGATCATGCATTCTCTTAGGGTCACCCATACGTTGGCCATTACATATCTGCTTCCCTGTTTGATTCATGGTTGACATGAAAAAAGGTTACTTTGTTGATTATAAGAAGTAT…
>DN58688_c1_g1_i3	len=293 path=[1:0-86 4:87-88 5:89-89 6:90-121 7:122-180 9:181-181 11:182-195 12:196-196 13:197-272 14:273-274 15:275-292]
ATTTTTAAAAGTCACAATAAATTCAGCATCAAAAGGTCCAATATATAAAGCAAGTTTCCAAAGACCGTGCTTGCAAGACAAGAATGGGGGAGAAAGGTGACTATTGATAGAATTTTGTTCAGTGCGTGAAAAAACTTCTATCGGACAAACGCACTGTTTACCTGTTTATGTATACTTCACATTTCCTGAAGAAGTCAAAAAATATGACAATGGAAACCTGTTTATGTATACTTCACATTTCCTGAAGAAGTCAAAAATATGACAATGGAAACCTGTTTATGTATACTTCACAT
>DN58617_c0_g1_i1	len=1213 path=[0:0-1212]
GGAAGAAGTCCAAATATTTTAAGTTTATTAAACTTGTAATTCATACGAGTGAAATTGTTATTTTTAAGTCAATTACAATTTTTTTGTGTGTAAAGGCTCGACTTATATTACTGCTTCAAAGACATACATAGTTTTTCTTTGTTGCTAATGGCTGGCTTGTCAGGAACCCAATAGCACAAGTTGAGTTTCTTGAGTACATGTTTTTCTTCACCTGCTTGTCTGACAAAGAAAACCTAGAATTAATACTGCAACTGCTGGACTTGACTTTTTGACACAGCCGTGTCGGCCCTTCATCAATGAGCCATTTAAACTATAACAAAATTTGTTCATGGATTCCAAAACTAAATAGATTCAGAACTAAAGACCAAAGGTGAAACCAGAGACTGACCAAGAGCCCTA…
>DN16137_c0_g1_i1	len=387 path=[0:0-386]
GGATATTTGATAAACGGGAGTTTGGAGTATGCCCGTCAGCTATTTGACAAAATGTATGAACGAGATGTCAAATCCTGGACTTCCATGATTATGGGTTATGCCCACAACGGGCACGGTGAAGAGGCCTTGGATTTGTTTTTCGAGATGCTGCGAGCAGGCATGAAGCCTGATAATCTTACTTTTGTCATTGTTATCAGTGCATGCGCGAGCCTGGTGGCACTAGTGGAGGGCAAGGCAGTCCATGCTCAAATCGTCAGAAGTGGATTTGAGTCATACTTAAATGTGGGCAATGCTCTTATTACACTCTATGCTAAATGTGGGTTTCTAGATGATGCTTGCCAGTCGTTTGACAAAATGGTGAAAAGGGATGTTGTGTCGTGGACTGCC
>DN16188_c0_g1_i2	len=409 path=[0:0-247 2:248-408]
CAGGGATTAGTTGTTAAACCTTCATAAGAAAATTGTAACAAAGAAATGATAGGCATAGAGCTGATAAAAAGCTCGCCATTGAATAGCAACATGAAAACCCTGTCGCAATAGTTGGACTCCAGCATGCCCAAGCATCTAAAGCAGTTGGTAAACAAGCCCAGATACAATCCAGAAGTCAGGCAACAAAATTAGTAGACAAACATGCTCCTACATCAGGCAAAGCAACCAAATGAACCAAGTTCCAAGTTACCGGACCAGAGCAGAGCTGAAGTCCATCAGGGTTCCAGAGAAACGCAATGCCAAACAAGAACAAAACCATCGGGAGGTAAATGTCAAAACCCTCGAGAACCGTATGATCAACCAAGTTGACAAGGGTCATCGATGAGGGAGACATATCCC…
>DN16185_c0_g1_i1	len=803 path=[0:0-802]
GGAAGTTGGATCCTTTATCAGGTTCATCTGCGAAATTTGGAAAATTAATAATGTTATCGAAGTATCTGGTAACTTGCTGGAGAGACCTACTCTTGCTGAACACGATGTGTGGAGTTCTAGACTTTGGGAGCAATTTGTAATACTTAAATCCAGGTTTTTAGCATCTTGATGGTGGTCATGGAGGACTTTGTTATCAATCGATTTGGATCTTGCCTTTGAATTTCTTCTTGTAGTAGAGGTGGTAGGAATTGACAATGAAATTGAACGATTAAGCCTCTTTGAACTTTCCGTTGAGGTCATGCAATTTCTAGCTCTTCACTTTAGGGTACTGGAGGCGGTGATGCTGTTGGAATTTTGGCAGACCAATTTCTTCCTAACACGGGGATAATGCGAGGACTA…
>DN16101_c0_g1_i1	len=389 path=[0:0-388]
GCCATTTCCTTAGATTGGATAGGTAACACTATTACATTGAGGGCGGAGACAACACTATTTCTTGTCATAGATTAAACCCCAATTTGTGACAAGAGGATGTACATGAGGAAGTCGGAAGGGGGGAGTGTGGTTGAGGATGATGTTCCAGAGAAAACACCTTTCAAATGCTCTTTTACAAAGGAGATCATTAACAATGGGAGTGTGCCACCACCTTCACAAACACAAACATAGGGAATTGGACTCAACAACAGCACTATCATAGGGCATCAATGTTGAGCTTCTTCTAGATGACACCAAATTCCAACACCAAACCCCAAGGCCTTCTTCTAATTTTCTAAAGGATGTCAAAGTGCAACACCAACCCCAAGGACGCTTTCTTCTAAAGGATA
>DN16114_c0_g1_i1	len=746 path=[0:0-745]
TCTTGAATTTAATATTAGGTTTTTTCATATGTATAATTTTTTTATATGTTAGTTGAAGTATCTAACTCTTAGTAATGATGAGAGAGAATGGAAATGGTATAAGACTACTATGGAGATATGGGTAATGTATCTATCTAGAGCCTTCCAAATTAAGCACACAATGCAAGATATGGGCCCCAAATTCTCATGGGAAGAAGATTGTGGTTGTGCAGTCCATGAATAAGAAAAGAAGTGTGCATGTTGTAGTGGATGAGAGAGCAAAGAAGATTGTTGTCGTTGATTTTGTGGTTGTGAATATAGAGATAATTGGTGAAACAGAAACGAAACCACATGTGGGTGTTGAGAGTATGACTTTGAATGGAGGGTGATATAAATATTTTTGAGTCACATCAATTGGTG…
>DN16147_c0_g1_i1	len=207 path=[0:0-17 2:18-81 4:82-91 5:92-118 7:119-120 8:121-206]
TGCATGAGCCGTCCCATGACTCTGCTCGTTAAACATCACAGTCTCAAATTCAAAGAGACCTCGCAAATCTGAAGCAAATGAATTTTGGATCGTCCCATGACTCTGCTCTTTAAACATCAGTGTCTCAAATTCAAAGAGACCTCGCAAATCTGAAGCAAATGATTTTTTCTTACAAAGAATGCAAGATTTAAATCCCCGACTTCTCTG
>DN16147_c0_g1_i2	len=258 path=[1:0-68 2:69-132 3:133-142 5:143-169 6:170-171 8:172-257]
AAGCCAGCAATAATAGGTGATAACGTAACCCAAAAAAAACACTCAAATAGAAGGATGAGCCATCCCATCACTCTGCTCGTTAAACATCACAGTCTCAAATTCAAAGAGACCTCGCAAATCTGAAGCAAATGAAATTTGGCTCATCCCATGACTCTGCTCTTTAAACATCACAGTCTCAAATTCAAAGAGACCTCGCAAATCTGAAGCAAATGATTTTTTCTTACAAAGAATGCAAGATTTAAATCCCCGACTTCTCTG
>DN16198_c0_g1_i1	len=271 path=[0:0-270]
GCAACGTGGCCAAATCCCATTTACATGAGCCAGATGTAGTCCCTTCCTTACATTGAAACAATTAATTATCTCTTACATTATGGAAAGGATCGATTTGGGCATAGTCTACTCGTAAATCGCTTTGGCAGTGATATCTCACAGAGGTCTGCAGGTTTGATTTGCAAGTTTGTTTGGGCTGTGCCTTACTCTTAGGTATTGCAGTTTTCTTCTTGCCACCTGTTCCTCTCTCTATATGTTTATTGACTTGAATGGGATCAGTTTCTTTCATTTT
>DN16155_c0_g1_i1	len=234 path=[0:0-233]
GAGAGGATCTATGGAATTTGAGAAAATTGTGGAGATGGCAAGCAATATCAGGTGAACTTAAACGAGTCGCGGAAATTGACTTGCAGCCCTTGTCCAAAATTATTTCTGATGGTTTTGGAGAACTTAGAAAGTTTTTTTTAATGACTTGTGTTGCAGCATTGGAGAATAGAAGACATTGCAATTAAAAAAATGGTAGGAGTTACTGCCTGTTGCCATTTCCATTTAAGGTTGAAG
>DN16105_c0_g1_i1	len=453 path=[0:0-452]
TACTGTCTTCCCTATAGGTTGAATGTTGGTTTGGTTAGCAAAGCACAGGTGCCATAGACTCCCAAACCCGACTGCTCCATTTACGGAAATCCTTGAGATGGCGTTAAATAGATAGAGCGGATGAAAGAGCTTGCATGCTGGAGTGCCGATGAACAGTCCTTGCAAGTTCCATTCCAATGCAAGGTGTTTGATATGCTCGGGGAGAATTCATGCGAGATTGAATGTGTGTTCAATGTGTCCTGCTATGCCTCAAAGACATTAGGGGATAAAACGAAATGACTTCCCCTTGCTTTTCCCTAATTCCCCAACGTTTAGAGTGATGGCCTAATTCCCCATTGATCAGCTTCTAGGCTGTGTGAATACACTTCACATGAAATAATACACTTTATAGCTAAGATG…
>DN16112_c0_g1_i1	len=606 path=[0:0-605]
TGTTGAAGAATTTTTTGTTAAAACCCTAGTGCCCTAAGAAACTATAGGGCAAAATCACGTTGTACATTACAAATTAGATCTGAAAAATCTGAGAACTAAAAAGAAACCCAAAATTTCAAACCAACAAGGCAATAATTGTAGCAAAGTGGTGTAAATTTTGTGAAAAAGGCAATCTTCATCAATAAATCCAATCTTTACCCAATTCAAAAATTTCACCTCACATCAATGAAGTCGCACATTTATCACATAGAACTGTCAGTCTTAGGGATAAACTGTAATATTCAAAAATATACCTCCAAACTCTCAACTCTGACCACCACTCGTCTAGGCATGTTCAAGTATATAAACATTGCAAAATTGAAAATACTTCAACTCTAGATCAATACAACAGCCCTTAGG…
>DN16152_c0_g1_i1	len=365 path=[0:0-364]
TAAATGATGGTATATCTCCCAAGGATTTACAAACTCCATCCTAACATGGTCCACCATAGTCCATAAGGATTGGTTGCTAAAAGAAACACTAGGGTGAATTTACTCCCCTTTCCATTTGAGACATAGTATATAGTCCTCCCAGGCCTTTTGAATAACTTGAAGCACGAAGGACCCTTGGCTTTTGATTAGTGTTGGGGTGCCTAGCAAGTCATGAAATTCTAAGCAGTGTTCCATGCAGATGTGTACACCAGAGAGGGGGGCACGCTCCCCATGTTTCACACCCTCTTGGGATGGGGGGTGATGCTTGGGAAAATGTCTCTCCACATCTCCTTTTTGGGGAATTTTTACTTATTTAAACATTAATG
>DN16156_c0_g1_i1	len=395 path=[0:0-394]
ACGTTGATTCCTATGTCCTCTCTGAATCTAGCCTCTTTTTGTATCCTTACAAAGTTATCATCAAAACTTGCGGGACCACAAAATTGCTTCTTTCCATTCCGGCCATCCTTAAATTGGCTGACGGCCTAGCCCTTTCAGTGAAATCTGTTAGATACACTCGTGGAAGCTTTATTTTTCCTGGGGCTCAGTCATTTCCACATCGTTGCTTCTCCGAAGAAGTAGCTGTCCTTGATAACTATTTTGGTAAGCTTGGTTTGGACAGCAAGGCATATGTGATGGGCAGCCCTGACAAAGCACAGAAATGGCATGTTTACTCTGCTTCTGCCGAAATGGCGACACAGTCGGGCCCTGTTTACACACTAGAGATGTGCATGACCGGTTTGGGTAGAAAGAGG
>DN16181_c0_g1_i1	len=213 path=[0:0-212]
TGATAAAAATGAAACTGAGAAACATAAAAAAACACAACCATCTTCTAGCAAGAATGTTGAAATGACAGAACCACCATTCCCCGAACGTTTGGTTTTAACCAAAACATCTGAAACACCTGCTTTTAATTTTATAGGGGAATTGCAAAATTTGTATGTTAAAATTCCACTTTTACAAGCATTAAGAGATGTACCAATTTATGCCAGAACATTAAG
>DN16140_c0_g1_i1	len=410 path=[0:0-409]
GGATAATAGATTTGGGACTTCTACACTACTGTCTTGGTTTGGAGGCATGGAAAAAGGGAGATAATATCTTTTATCTGCAAGCAAATTATGGTCAAGAATTGCTACAGAAATTTAAGATGAGTGGTTGCAACCCATCAACAACACCATTGGAGACTAGGCTTAAGCTATCGACAAGAAGAACCCAAGGAAGGTAGATGCTACCTTATACAAGCAACTAAAAGAATGTCTAATCTATCTGACTTATACTAAGTTATGTGTAGGGAATTGCTGATTTTGGTGTAGAGTTGGTCAAGAATGATAATTTCAGTTGGACAGGTTGCACAAATATAGGCTAGGTAGGATCATCAAATTATGGAAATTGAACCTCCAAATTTGTATTCAGGTTGGGTTCAAGTGCAA…
>DN16167_c1_g1_i1	len=349 path=[0:0-348]
GAGATTAACTTCTAGAGAAAAACGTCTTGTAACAAAGTAAAACCATGATATCATGTAAAATAAATTATGTAATGCATGCCTCAGGCAATTTCAATCAAGACACGGATACTGAAACAAAAATTATCATTAAGAAAGAGCACACCTACGCTCCTCAAACAAAATTGTGTCCATTATAATCCTGCAATAAATGAGCAAAACCAGCAAATTGCATGGCAACTAGCGCTATATAGCAGCAAATGTTGTTGAAGTGGCCGAAATAGTATACACTAACTTGATTCAGGATGAAATTAGTGTCCAAACGCTGGAATGTCTACAAGCCTTTACATAGTCGGATTGTGCCTCTCATTTA
>DN16167_c0_g1_i1	len=436 path=[0:0-435]
ATTTTGTTCAGAGCCTTCTACTTGGTAATGTTAGTTGCTAAAATATGTTTGATTGCTAATATATAGCCACTACACATTGAATGGGGTTGAACTTTTCAAAATAACATCCTTTTGATAAATGGGAAGATGCCTAACATCTTAGAAAAAATCAGTTACTATAACGGACTTTCTCTTGAGCTTTGGTTGCCAATATCTTGTCAGAAGTCAATATGACACTCTTGAAAATAGTTGATTAAAACTGCACACACCCTTGGCAGTCCATAAGTATGGTGGGCCTAAAATTTACACCTGAAAACAAAATTTGTTCATTATGATTCCATTTGGCGTAAATGAGAGGCACAATCCGACTAATTTGTTCATTGTGATTCCATTTGGCGTAAATGAGAGGCACAATCCGAC…
>DN16176_c0_g1_i2	len=713 path=[0:0-247 2:248-274 3:275-302 5:303-358 6:359-382 8:383-597 9:598-712]
TACCTCAAACTCCAATCTGAATGGCCACAATAATTCTGCAAATACCCCCTTCAATGTGCATGCAAATGAGCAAGCAACAATCACATAGATGGGTTCCCCTCAAGTGAGTCCCGGCATTACACAGGGCCTTCTTAAGTAAATCAGCTCCAAACAGTCCAAAATGCAAGGAGCAATAAGAAGTGAAAGTAGGTAAAGCAACCTTCAGGGCAATGCTCCATCATTCTCTGCATCCAGCTACTACATGAAGAAATAAGGAACAACCATGGGAGCCTCATTATCTGAATCAGAATCATTTGCATTCTTTCGAATACTCAATGGGACATCAACCAGCCTGAGTTGTGCCTCATCAGGGCCCTTATTTAGTTGTCCATTAGTTTTACTTTTGTTTACTGGTTTTTT…
>DN16187_c0_g1_i1	len=650 path=[0:0-649]
AGGCAAGGGCAAATGGTATGAACCTGAAGCCATGCCGCTCTCTAAACCTAGAGTTTATGTGATAATGATTGCCATTGTTATTGACTTGGTCATAAGTTGCTACATAACCTTGGATTTGATCAGAAAAAGTATACGTTTGATGAAAAGTAGACAGATGACTTCATTTTGGGATAAATTGGTGTACGCTTGTGAACAGGGAGTGTACATCCTTGCACATGGAGTTACTGATCCTTCGGCTGAGGGAGGAGTTCCTTCTGATGGCAGTGAGGCAGGATTTCGTTGGATGTGGAAGAATTCGTTAACTTCGATATATACGATTCGTGCAGTAGGGGGTTGTGTAATTGGCGCGTGTGAGATATGGGGCGTTGTGTCAATGGCAAGGGGACATTTCCACGCTCA…
>DN16144_c0_g1_i1	len=330 path=[0:0-329]
TACAATATCTATATTTGAGTGATAATCAATTGTCAGGAAAAATCCTCCGAAGTATCTTTAATAGTCTTACAGATTTGTATTCGGTGGATTTATCAGGAAACAAGTTGGAAGGACCAATGCCAGCCTTACATAATTGTGGTTCATTAGTTTCCCTTGATGTGTCAAAGAACATGTTTAACGGAAATCTCGACATAGGGCTTTCAGTTTCATTGTTATATTTCTCTGGCCATTCTAATAATTTTTCTGGGCCTTTGAGTTCATCTTTTGTTCACTGTAATAGACTTGTATTACTGGATCTATGGAATAACAGGTTAATGTGTGAGATACCAA
>DN16122_c0_g1_i1	len=203 path=[0:0-202]
GAATACGATGATAAGGTTCTATAGCCATTGCACTATGTTAAATGTAGTGTCAAGAAAAATAATTGTTTCCGATGGACCTAAACTAGTAATAGTGCCTTTGTCTATCTAATGCCAACCCAAGCCATCGATGATTTTGTCAGTCAGAACATCTCAATTTCGTTTTATCATTTGATGTAACCGATCCAAAGGGGGTTACTGAGAAC
>DN16119_c0_g1_i1	len=271 path=[0:0-270]
AAAATATGCAACTGACATGCAGGAAATCAAGTACAAAGAGAAAGTAAAGAAGCCTATTTGGAAATAAGAAATTTAAGGTGTATGGGTCAAGTTGTTGTGATAAAGGTTGAAGGTGCAAAAAGGAGGGTTGCATGGTTAGATGACAACTCGATTTATTGAGGACCATAAGTTGTTGATAACAAATCAAGGAAGAACTTGGATTCTTGGAATGGCGCCTACAATTAAATTATTTAGTGCTTAGCTCTGGCATTGGTGTCTCCTAGAAGTTGGG
>DN16115_c0_g1_i1	len=402 path=[0:0-401]
TATTAAAGTTTGGACTGAGGACAGAAACTTCCTTTTGACCAATGGGGAATGGGACGGGAGTAAAGGAAAGAGGTCCGGCACAGGGGGGAGGTGGAATGTATAAGGGCATGGGAAGGGTAGGTGACAGTCATACTGAGAGGGGAAGGAGTGTTCATTGCTCGACATGATAGCAGGGAGAGGGAATCTTCTGCTCTTCCACAACTTTTGATCGTTGGTTAGCTCCGATCATTTGGGAGTGCTCTTTGTTTGGTGTATCCATGTTTTAGGGAGTCATACTCCTTGTCACATCTGCTATCCTTCTATTCAGATGAGGAAATTGCTCAACAGGATGTTCTCTGTGGCAACAATGCCTTTGAGATTGGATAATTAAAAGCTAGGAATCTCTTGCACAGTCAATTT…
>DN94873_c0_g1_i1	len=311 path=[0:0-310]
ATATATTTCTCCTTTAATTTTTCGATTTGAAATTTCCCCTTTCTATTTGGTTACTTCTTTGTAATATTTTTTTTTTAAACTTTATGGTTTCCCTTTTTATTGAAGCTTAGGCCTTAAACCCTTTTTTTTAAATTTGTTTATATAGTTCACCTTTACTTACATTTAACACATAAATTATTATTTTATTTTGTTGTAATCGTCGTGTCCTCTTCTTCAATTACGACCCTTCAATTATAACTCTTATCTTAGCCAGCGTAGTTGTATCGACCAACGATGTTAGATGACAACGTCAAAGTTGGTTAAACTGCGAT
>DN94812_c0_g1_i1	len=1174 path=[0:0-1173]
TTTGATCCCTATTATATTTAGTCTCAAATGCTATTTTCCTACATTGGGATTCTGGTCATTTCTTTCCTATAATCACTTGCTCTTATCATTGATAGTTAAGGCATCACAAGCATAACAAGGATAGGACTTGATACAAGACACTAGGATCATGTCTCAAGGTCCAGTTCCATTTACAAAGATGGCTTCTATAGCCAGAGGGGGTTCTGTACGTACACATCCATACACTAAGCTGTAAAATCCGTGCAGGGAGCGGGTTTCTGTCCCACAAATAAGGGGGTCACATACATCAATTTGGCATCTGGTTGGGCCATAACCTTAAATTAGTTTATCTTTATTATTATCTATTTGTGTAATATTCTGTGTTTCTTTCTGGTGGTTTCCCTGGAAAGCAGCAGCAGT…
>DN94878_c0_g1_i1	len=325 path=[0:0-324]
GTGCAAGATCCAACATTAGGTTCAAATGCTTTTAATTAAGGCTACGAGGGACTTGACAAATATGAATATATACCTCAGATTTTCTCAACATTTAAGGGTATGCCTGAATATGAAACTCTCAACCATAAACAGGAATTGTCTCAAACAAACAATCCGACACCAGAACCGTCATGAATTTCTTTTTGCAACTAACAAGCATATCCCTAGAAATGTCTGTACACAAAGCCACTGTTGAACTTGAAGATAAATGGATAAAAATGCAAGCTTTGAGAGATTTAACTCACACAGAAAATCATTTTTAATGAAATTGAGAAATTTTTTTGGG
>DN94881_c0_g1_i1	len=313 path=[0:0-312]
TTTTAATCCTGAACAGCTGCTTAGTAAGCATGTTGTCCCAGGTCCAAAAAGGAGAATATGTCCTCCTTTTATCTGTTTGGGCCCATTCAAAAGTGGGATTCTGAGCTAAGTTTCTTGGCCTTTTAATTTGAATAGATGGATCTTTCTAGGAGGATTTGGTGTTGTAGGTTTAGTGCGACTTCAATTGTTCGCCCTATCAGCTATTTCCTTGTCTAAATCATGTAGCATCTAAGAAGATGATTTTCTGTTTCTGGAATCTGTAGCTGCTTCCTGGTGATTAGCTACTCAGTTTTAAAGTTTTTTTATTCTTTAG
>DN94884_c0_g1_i1	len=359 path=[0:0-358]
ATCTTGGGCAAACAGCTGTTTACAGGCCCACCTAGTGTTGCCATCTTAGTAACTGGCTAATCAGCAATGAATGATGCACGAACCCAAACACCATAGCTGCCTCCAGAACCTACATTAGACGGTCCTCACTGCTTTGTCACTTATAGATCGCCTGGGAACCCCCTTGTTACATGATATTCTTTCCATGGAGGTCAGATAGCTGTTTACAGGCCGCCTCAGTGTTTGCAGAATCATACCGAATATACCCTTCAAAATAATTAAATCCTTCTGACAAGAGACGATTCTCCAAAAATTAATCCCAACGCTGCCTTTCAAGAGTATTGGAAATGTTTCCCTTTGTCTAGCAATCAATTTAATAA
>DN94846_c0_g1_i1	len=223 path=[0:0-222]
AGGTCTTGACCCTTGGGTGGGCCACAATGAGGATTATGTACTTTCAACGGAGATCATGGTCTCTCTCAACGGCCAAGGTGTTGTGTTCCTTAAACAGATCGAGAAAGCTGAAACCTCAAACATATGGCATCAAGGATGGAAATCAACGAGGATCTTCTCCGAGAACCTCGATGAGGTGAAGAGTGTCAGAGATTCATAGGAGAATTGCAGCGCACCAATGTTA
>DN94877_c0_g1_i1	len=395 path=[0:0-394]
GGAGCTCGAAGTTCTTTTGAAGTTTGTTACTACTTTGGAAGTTGGTTATTGAGACCTTCGTCGCCTCTTCGGAGAGCTTCTTCATCAAATCCTTCTTCGTCTCCCACTTCTTTTGCTCCATCGCCATCTTCAAGTAGAGTTGCACCGTCTCCACCGAAATCCGGATCACATGTTTCTGTTCCCATGCCATTTCTGACTACCCATAACACGAATGGGCCTCCATCAGCTTTTGGATCGTCTGCTCTTATCTCCAAGCCTCAGGGGAATGCTTATATTAGTGTGCATGAATCCCTCGTGATTTTTTATTTCCTCAGTTTGGCTGATTGTTCCATTATGTTAAATTAGGATTTATCCTCTTTTCTTTAATGGATGTTGCAAAGCCTGTACAATAAGGG
>DN94882_c0_g1_i1	len=244 path=[0:0-243]
ATGCAGTAAATGAATGTTTTCTCAATAATTACAGCCATGGAATAATGAATGTTTTCTCAATAAATAGTCTCCTGGGTTTCCTATTAGCAACATTCTTTTGTAGCAAGGTTATATTCTATGCACAGAAACTACAGAGTATCATCCACAGTGGTCACTAACAAGCCTAAAAATTTAAAATACCCAATAGGTACTGCAGTCCATGAAAGCTCCCTTTTTCCAAAGGAAAAATATCATTACCTTGTCA
>DN94865_c0_g1_i1	len=238 path=[0:0-237]
TGTCATATGGTGAAATGATGTCAAAGGTAAGGACTTTTAGAGGTGCTTCTCCATCTTCATTTATGAATATGAACTGAAAGAAGATAATTGTAGCAGCAGAACATCTAAAGAAAAGGTCAAAGGAAAAACTCTACTTTATGAACTAGTTGTGTCAAGAAGGTGGGGCTCTGTACAGTCCAGTATCAATCACAATCCTGCTTCTGTTAAATGCTGTGAAGTTTGCATCTAAAGTTTTCTG
>DN94863_c0_g1_i1	len=357 path=[0:0-356]
GGAACGTTTATTTAAAGAAACATGATGACAGAAGTACAGAGAAATGGCAGACAAATAGAAGGAATGCTTCAGATTCAGGCAAAAAAGGTTAAACTACATCAAATGTAAACAAGCAACATGGAACTCGCTAGCGCACATTACAGAATTGAAATTAAAAACTAGATGGGATATTGGAAAATACACGTGCTCTCTTGTGGCAATAAGCATTGGTATGAAATCATTGTGCATGCCATCTGGGACACTACTACTATCATATTGAAGATATATAATTCTTGTAAGTTGCGCAACAGAAATCTATGTTGAAACTGGGTCTGACATTAACCTTTGGAATGATGGAGAGTTGGCCAAGAAAAATTT
>DN94808_c0_g1_i1	len=202 path=[0:0-201]
TGAGAGAAAAGGCCGAAATTCTGTTTTTTGCCCACATGTACGAAAGTTCTAAGTTTTTTCCTATGAATTGCAGGTTCGAACTGTAGATTCGAGTTGTAGGGCCTAAATTTTGAATTGGACCAGATTTGTTGAAGTTTGACCAACATTGACTTTGTGAGCTTTGACATGTTTGAGAAAGATTTTGAAGGAGGGTTGACTTGGG
>DN94861_c0_g1_i1	len=280 path=[0:0-279]
AGAGCTCCTAACAGGCTTAGGGCTGAGATTAGTCACATAAAAAAGATGATTGCGAAGAAGCGAATTAAAGCACTGAACCCCGAAAGGGACTGCAACTCAGAAGTGAGAGATAGCACTAAGCCCAGACCCTTGTAAGCTGGGGAAGAAACTCTAAAAACCTCCACAAAGAAAGGAAACAGACAAAGAACAGCATCGAATCCGGACTTGAGAAATAAACCACTGGAGAGAAACAACAACACAAACAGAAAGAGCACCTGATATAAAAGCTGGCCAACTACAG
>DN94848_c0_g1_i1	len=440 path=[0:0-439]
GATTATGGCATATATTGTCCTGGATTTTGGGCTAAACTTAATCGTAGTTCTGTTCAGTAAAAAGGGAAAAATGACAGAACACAGAATATGGTAGAAGTTTGTTCAGCGAAAGAACAGCCTGAAGGGAAGTATCATATATGCCTTTTATTCTAAGGTTATGTTGACACCATATGCATAAATGCAATGACACGGAAGTCATGAGAGGATTTGATTCTTATATCTGTTCAAGCCATATACAAAAATGCAATGACATGGAAGTGATGGAAGGATTTAATACTTACATCTTGCATGTTTGGTAGGTAATATAGATTAACTGTAAATAAAACAATCGGGTGAAACATAACTACATTTTTTGGTGGTATTAAATATCCTTGAGTTTCTTTTAGGATATTGTTTTCC…
>DN94821_c0_g1_i1	len=284 path=[0:0-283]
GCCTTGTTAACCTGGCAGGAAACATCGAAGGAAAAGCCTTGTGTTTATTCCTTGTTAATCTGGCAGGAAACATCCAACGAAAAGCCTCCTTTACAACATTATGCACTGTTCTAAGTTCATTTGAAAAGTTTCGAAAGGAATTGCGCAGAGAGCTATGTTGAATATAATTTTATAACCACATATATGAAGTACATCACCCATTGTAAGTGACAACTAAGAACATAGAATTGCTACTGTATAATATATGTAGCAGATATTTACAAGCATCAAGTAGCTCGTTCCTG
>DN94832_c0_g1_i1	len=284 path=[0:0-283]
AGTGTGAATTACTTCATGAACAATTGTTTTCAAACAAGGTATGTTTCTTTAATTTGATATGGTTATTTGATCACTCCTTAATGCTTTTATCTATGATCACTTTTGATGATTTGAGTGTATACTGGATCATTTGAACAGAAATCAACATTTGTGAGATAATGCACTCGTGATATACACTAAGTGCAGGAACAAGAATCGTAAAACAAAATTGGCACCTGTAGTTTTATCTTGCAAATTATTATTGGACATTGTGTTTTCTTTGATATTCCCTTGCAAGAATGAGG
>DN94815_c0_g1_i1	len=274 path=[0:0-273]
GCCACAAGGATCATGGTATGTTAGGATTTGCATGCTACTGCAGTCTAGACCAAAGCTCATTGAACATGCAAGACCAAATGATTCAAAGTTCAATGAATTCAAACAAACGTTCAATGATAATGCAAAACTCTTGTCATGCCCAACTACGTAAGTAATATAACCACCTTTGTTGCTATTTTAGCGTTTTTTCTATCATCGTGGAACCATTTGGTCCTTTTATACTTTTCTCATTTGATTTCACACCTCCATCTGTTAGTTTGTTTGTTGATTTCAT
>DN94818_c0_g1_i1	len=300 path=[0:0-299]
TGAGTTTATCTAAATGCGTTTTTACTGTTTATAGCATGCTTTGAAACTTTATTAAACTTTGAACCATAATGGCTTAGAATTAGATGGTATGTTAGTGCCCTACGATCCATTATATCTTGACTTGCATTGGATTCAATGGTTGGATTCTTCGGGACATCTTAAACCCTTGAACATAAGATATCTTTTATTTTTCTATAATTCTGTGCCTATGATTTTGTTTATCTTGTATAAGGAAATTTGAAATTATGCATTGAAATTTGATATCCATGCAAGGGAATTCGTTATTTTTGTTAAAGCACA
>DN94862_c0_g1_i1	len=269 path=[0:0-268]
ACCGCCGAGAATATATATATATATATATATAGAAAGAAATCCGATTGTTCGAAGAAAGAAGTTAAAATTTGCAGGCATCGACCAAATGTCGAAATCAATACTTTCAGCCGGACTAATTATTAAACCTTTTATGCATAATTTTGCGCATTGTTAAAGAATAATTTAAATAACGGGAGACGCATAAAACATAACGGGAAATGTATCTTTCGCAGAGCTTCGGCTTGCATTCTCCGGCGTGTGTATATATATATATATATATATATATATAT
>DN94898_c0_g1_i1	len=302 path=[0:0-301]
GTGGACAAAGAGGTACAAACAATGGTGTTTCTTTTCTGCCCCACGCTTAGTCACTGACTTCACCAAAGTTCTTTTTTATAGAAAAATGCTGCTTATAGCAACATAAAATATGCTATAGAGATAATATGCAAATGGGCATGACAATAGCTAACGGCCAAGAGAAGAGTCTTTAGATCAGCCTCTGACTCAACTGAACAGTCTCACACATTTCATTGTCAAAGAATGCTTGGAAAATTTCAGAATATGGCGAGTATCATGGCCCAACAAATAAATTTCATTGCATTTGGTAAATTTATTCGATT
>DN94859_c0_g1_i1	len=813 path=[0:0-812]
ATGCAGCCCTCATCTTTATATTTTTAATTAATAATTATTTTACTCTCATTTTCCTGTCTTTCATTAGCCTCATTGGTTGCTAAAACCTCCAGTACAATCAGAAAATGTAATTTCTGTCTGTGCAATTGAGTTCATTATCCGTTTATTTATTGGTTTCTCTTGTGATTATTATCTAGCTGAGAGGTCCTAACATTGATTTATCTTGGATTGAGTACATATGCTCTGAATATGGTAACAATTTTGCTTACTATGAATTCATTAAATGGACCCACTATCTAGCTCCCACTGCCAATGTCTAAATGTAGCCAATATGGGAAACTGAGACCTGAATCACATATATATCTCTTCTAACTTGGTTTGCTTTCTCTTATTTCCTAGTCAGGTAAACAGAGGAAGGTG…
>DN94827_c0_g1_i1	len=488 path=[0:0-487]
AGAGGATCTATAGGTGTATTAGCCACCTAATGAATCAATGATTACAGTTGTTGATAAATGATAAGCAGGGCATTTCAATCAGACTGGAGTATGGCCATCAACTTCGATTGCCTTGTAATAACTGTTACATGTGTGCAAAATCTGTTTCATAGAAAGCTGTATCTGTGAAAGCAAAAATGCTCTGTATGTCAAGTTGAGCGAGGAATTGTGAAGGCATAAAGAAAACCAGAGAGAGAGAGGCAGACAGATACTCCATGCTAACTCCCCTCTTCTTTCATAGACATAGAGCACAGGTGTTCATACATGTCTGGCACAAGGTAATTGACCTCTAACTTCTATAATGCCGTCAGATACATTATATGTCCTGTGTGTTTCACATGAAGCCTTTTTCTGAGAGAG…
>DN94874_c0_g1_i1	len=285 path=[0:0-284]
AGACAACTCCGGATCTCCAGGAAAAGATATAAAGCTAACTTGCAAACCTCCCAACAGCCCTCCTCTAAAAGTCAGCACATTATGGTCAACAATACACCGTCAAACAGTCAAGCAGCTGCACATGAATCCACCACAACCAACTAACAATAGCCACATGACCATTTTTAATGCCTTGGATACCCTTGCCACCAAAGGTCATAATGACTAGAACAGTTATTGCCAAATGGAACACTCATATCTAGAGAGAATTGCATACCACTCCTCAAGTGGCAAGGTCAACTGATG
>DN94868_c0_g1_i1	len=285 path=[0:0-284]
TGCCATACTTGATTTTTGCAAACATCAATTACAGATAATATGTTTTAGTATTTTCATCTTTTTCTATACAAACTCCTTCCTGTTTGAGGGCTTTGTGACGCTGCAAATACAAGCTCCTTCCTTGCTGGGAGCTTTGTGATATAGCCAGTACAAGCTTCTTCCTGTTTGGTGTCTTCAAAACAATGCAGTTCTTGGATCTGCCTTTGGTTGTGTAAAAATTAAGGTTGCTCTTTGACATTAATCATAGGTGAAAATTTCAGATTAAACTTGAGTGAAATAGCTGGA
>DN94869_c0_g1_i1	len=283 path=[0:0-282]
GTGATTGTCTGCTGCTCCAGCAAATGTTCAAGAAGCGCATGTTACCTCAGATGATGCCCTAGAAGGGCCGCTGCCACGTTCCAGGAGGGATCTGCTGGCCCAGACAAGGTGCTCTTGCTTGGAAGGATGATAAATGATCCAACGTTTCACCTACTTGTCCTCGAAATCAATATATGATATTGTTGATCCACAAATTAGACTCTTGATGAACAAAATCATAAAACAGGCTTGCATAAATAATGCTAAAAATTTTACGTAGAAATTAGGAATCTATTACAGCCTG
>DN94836_c0_g1_i1	len=213 path=[0:0-212]
ATTCCTTCGTTGTGAACAACAAGACTTGGGAGGCTCGCTTGAGACAGTTGAATGGGACGCAAAGTAAGCAGAGAGGGACTTCTTAGCGGTGGCATTTGGTTAGGGCACGAGTTCATAGATACAACCTTGGGGAGTGTGTGGTCTGTTGTAGAGGTAGAGTATGTTCCACCTTTGAGTTCACATTGAGGGAGATGACAATGAGTTAGCTGTAGG
>DN94831_c0_g1_i1	len=258 path=[0:0-257]
AGGCTTCTTATTGTTAGTGACGTTAATGAGCAATAACAGAGCACATAAGAGAATGGTGTAGCACTCCCTGAACCTGAACTGGGTACTCGATAAAGAAGGCAAATCACTGACCTCTGTACATCCGAGGTATCAGATCCAAAGCTTTTACGGTTGGATTCAATTTCTGTTTGGTGGTGCGTCAAAGATTTGAACTTTTGTGTCAGGGAAGATTTCTATTCTTTGGATCCGGGGATTCTAAACTTTGCAGCTCGTTGGATA
>DN93858_c0_g1_i1	len=203 path=[0:0-202]
GGGGCTGCTTTTTTGGGGCTCATAGATCCACAGGTACCAAAGACACTGAAAAGTAGGTTTACTGTACTGATGTAAAACATATTTCAGGGAAAATTCACCGACTTTAGTACTACTGCAGAATTTCTTTACAGTAAAGGGCCAAAGGCCAATACATCTGAATTTGCTACGATGATTTAAACTTTAAAGTGCTGTTACAAGTTAGA
>DN93809_c0_g1_i1	len=380 path=[0:0-379]
GATTCATTTAAGCAGATTATCAATTGCACTGGGCTACCTTTTCTAATTTCCGTGTTTGCATTCATTCCACATATACATGGTCATGCAACTGATGCAATTGGAAAGAAAATCACAGCTAGTAAAATTTTCTAACCAATAGCTCAGACTTATTGCTAGAACTTTAGAGCCGGCTATACCTTCCAATTGTGAACTAATAATTAATGTAGTGAAACTCAATTGATTCACTCAGAACCAATTAAGTTTGACTTGTTTTGGTGAGAAAACAAGCCATCTGTCTACCACATCTAGTATCAGAGCTGAACCCTTGTGTCAGGTTGTATCATTGGATACCGGAAGTGGTAATACTGGGTATTGCTATGGATTTCTGTACTAATTGCTGG
>DN93854_c0_g1_i1	len=442 path=[0:0-441]
AGAAGACCAACACCACATTATGGAAGAGAAAATGTTACCTTTTATCAGTGTGTCACTATCAGTAAGGGAAAAGGAAATTCCAAGGATGGGTTGGACACTACATTATAGAGAAGCATTATAAGTCAACCATGATAGACCAAAGAGAGAAATAGATATCAATATCTAACAGTGTAATGGATTGCATCTCTTTGATGGCAATTGTACATTCTAGTCGTAAAAAGAGCTGGAAACTATTCTCCATTAAGATCCAACTCAAGAAGAAGCTTGTGACTTTAGTGTTTGACACTGGCAAGCAATGAGACCCCATCTCAAAAGCAGTGATAAAGAAGCATAATTTACCTACAATCGCACATCTTTAACCCTACCCCTTGGTTTTGCTTACCAAGAACAAGGACTTGC…
>DN93874_c0_g1_i1	len=227 path=[0:0-226]
TCGTGAAATAAGATCTGATATGTGACATCGTGTCTTTAAATGGGCTATCCGTCCTTCCCACAGGATTTGGGCAGATCTATCCCAACAGTGAATATCTGTGCGTCCCCAAGATTTTGATGAGAGATTCCAGCATGCATGGCTTCGGATGCGCCAGAAAACCCATAAAAAGACCGAAAAGAGAAGCCTTGCTGCATTGTTTCTGGTTCATATCTAACCCAAGACAGTGG
>DN93882_c0_g1_i1	len=263 path=[0:0-262]
GCACTGTGTCTTGACTCTCACATTCTGTTTCATTGTATACAAGGGTTACAATAGCAAATGATGATTTCATAGCTCTCTACTCCATTTTCCCTTTTGGACTCCTGAACATGTCAGCAATAGTTTCATTTGACTTGATTTCCTATATATTCAACTCCAATGGCCTCTCTCTTTTCTTGGGTCCAGGTTAACTGTCTATATAGGCCTATTTCGTAAGATTATCGTATGTATCACCAAGCATTTAGATTTGATCTTTGGCAATTATT
>DN93835_c0_g1_i1	len=220 path=[0:0-219]
ATGGAGAAAATAAGGAAGTACAATTTTGTTAATGCATGTAGTATTTTGCTAAAATTTGTTCTCCATGTGCTATACATTGAGTGTGCCAGAAAAGGATGACTGTGAACATGAAAAACATTTTACTGGCTCAAATCATGGAGAAAAGTTATGAAGTACAATTTCTAGAGACATGCAGCTGTTTCCTAAAACACTAAAACCTTTCAGTAACTTCCAGTAAATG
>DN93806_c0_g1_i1	len=314 path=[0:0-313]
ACTGTTTCTTTGTTGAATTGGATAGCTTAGAGCTTGAACTGGCTGGTTCAGTTGCAGTACCTTTCTGTCTGCTTCAATGACTGGCTTGTGATTTTTTTTGCAAAAGTAGGTTGGAAATTGGCCATTTGTGTTTGAACTGTCTGGTTTTGACTGCCTTGGCCTACACACATCTTACCTGAAAACTTAAAACTTCAGTGCCTAATTGAAATGAAAACAGAACTATATAATTTCTCTATTATAAAACAAGAAATTGAAAATAAAATAGGGTCACAATTTTGAACGAGCTGGTTCTCTGGAGAGCTATAAAATTGCTA
>DN93875_c0_g1_i1	len=310 path=[0:0-309]
GTATTGGTGTTTTCTCAGTAATGTAAGTGGAATCTCTGCATACAGTATAAAGTCTTCACTGTCTTGAAATATTTATTAACAAATATTCCCATGGAATTGGGTAGAACTTTGTATAGGTCCTAACGCGTCAATACTGTCAAACATTGCTGTTCAGATTTCACCCTCAAACAGACAAATGAAACCTTTAATGATTCTTGTTTTACCTCGATGCTTGATTGTCATAAACGATATACATATGTCATCAAAGATCTTGAAGTTTGGCTTGTCTGTGATGCCCAACTCACTTAGCACCTATTTGTTTACCCTTTCT
>DN93885_c0_g1_i1	len=385 path=[0:0-384]
TTATCACTCCATTATTAATGGGTAATCACACCTGGAGTTGCTCATATTGGGCATCTCCTGGGGTTATCACTTCATGATTAATGGGCAATAATGCTGGAAATTGCTCATATTGGGTATCTCCTACCTTCTGCTCCCTTTTGATCTAGATCCTTTAGATTGTTTTGAGATCAGATCCCTAAATATTACATTATCAGATTTATTCCACTTCGTTATCGTGTTCTTCAAGCTATATGAGAGAATTACAATGGCACAGGCGATATTTTTCATTGGCTTCAGAAAGAATTAGAAGGGGGAAATGATTGACTCACTCACTACACAGTCGCAAGATCAACTAGAACCTTTAAAGCCCTTAATGAAGATGGAGAAGTGGATCAAGAAGTGCTGG
>DN93853_c0_g1_i1	len=238 path=[0:0-237]
GGATGACGGAGGAGGAGGCCATCAAGTTGGCCACATTACACTTGGATGGAAAAGCACGAGTGTTGGTGCCATGGGTTAGTGACAATGGATCACAATAGCATCACCTCGTATATTGAGTTCACTCAAAGGCTCATTGAGCAACTTGACAGGAAGGGCGCAGAGCTTCATTTCAAGCAGCTAGCCCAACTCACACAGACAGGCAGTCTGAAGGCCTACATTTGAAAGTTTTAGAGACTAG
>DN93860_c0_g1_i1	len=254 path=[0:0-253]
ACAATTTCTATTTTCTGCTTCAACCTCCCTGTGTATATCGCTATTCTTGATTCTTTTGGACATATATCTATAACGTAACATATGAATGGGAACTACATTCAGTAGATTTTGGCTGGCATTTGGAGGATGCACTTAAGCTTGCAAATTTTAATAATTTATGCAATTTAAATTATTTGATAGACTGCACGAGCTGGATAAATGTAAATTTAATTTTAGTATTTTTTTGCAGATGTGGAAATATAAACTTTGCAAAG
>DN93829_c0_g1_i1	len=364 path=[0:0-363]
TTTCAGAGAAAAAAGCTTCATAAATTATATTAAGTCAATATAAAAAACCATAATAAGATAAAAAAGAGTAGCTTGAGAAGCCAGAATCATAACCATCACTGGACGGAGACATGATAAGCACATATGCATAAAAGCACTTGGAACAGAAAACACATGGCTCAGCAGAAAAAGACTCAGAGAAAACAGGATGATCCATATTCAAAACATGCAGAACCGGGCTGTACTTCAGTTAATCAAAAACATAGCTATTCAGAGTAATATTATAACCTACGGTAAAATATTACTGTTAAACTTTTGTCAGTGTGTAACATGAAAGGCAAAGAAACGTTAAAATCCATCGATGTCTACACAGTTATATGTTAGG
>DN93856_c0_g1_i1	len=231 path=[0:0-230]
TATTCATCCAAGATAACAAAACCAAGAAATATATGAACTTAACTCATTCATTCTTTGTTATCTACCTCTGCGCTTGAGATAACCAGAAACACAGATAATATAGAAGATAACATGGCTCTGAGAATGTGGGCTTCTTCCACAGCCAATGCACTCAGAATTTCTTGTGCCTCCAAAGCCCATCTCTCTCCTGCATTCTCTCTCTCCCGCTGCTTCTCTTCTGTTTTGGATGGG
>DN93816_c0_g1_i1	len=224 path=[0:0-223]
AGTCCTTCCTACAGTTGGTAACTCGGCATCAAGCTGTGTACCCACGGGCAGATCTTCCCCACTGAAATGGCCATACAGCAGCATGTTGCCCCACTTCCTCTAAAAGCCTACTGCATCTGCCTCACGTTCTCCTTTTGCTGGCAGTACTGTGTGCCATTGAGAGTGGCCTGCAAACAAGCTTCACTGCCGCGCTTTGCCAGGAACTGTTCAACTGCAGGTGGTCA
>DN93880_c0_g1_i1	len=386 path=[0:0-385]
GCCAGACAAAATCCTCTAAAACCAATACCCGTAACAGAAAAGGTCTCAGAAGATCTCGTAGTCAGCAGGTTGGCAAGAGTCCAAATCTTGTCAGTAACATACTGAAAGAGGGGATGGAAATAGAAGAGTCTTACTAAATATCATCCCAACTGCAATGGTATTTGTGGTAATAAAACAGGTGAAACATATTAGAAGCTGAACTGACTACAAAACATAAATAAATCATGCTGAAGAGCTAAATGACATAAATCCTTTGCTGATTTAGGTGGGGAATAGAACCACGACACAAGAGTCCATAGCTTTCAAACGAATTGGAAATATTATTCAAAGTGAATGAATAGATAAAGGCATAAAGGACATGAACAGCTTGGGTTGAGGTTTACTTA
>DN93866_c0_g1_i1	len=218 path=[0:0-217]
GTCCTGCAATAATATGATGCCTCAGTCCTGTGGTTACCAACATTTCGGTCCTGTAGATGATCCAAATTTCCTATCTTCGCTACCTTGCAATTCTGTTTGAACTTCATAACTTCTGCATCATTTAGTCGACTTCACTTGGGTATATATAGTGATTTTCCGCTGTACTTTGAGCTGACATGAATAATAGGCAAACCGACTTATAAGAAATGAAGTTGTAG
>DN93846_c0_g1_i1	len=234 path=[0:0-233]
CCGACGACTTAACCCAAGACAGCGGTCAATGCTGTCACTATTGAGGCCTGACCCCGCGGTTAGCTCGGATGTTTGTACTAGAGGAACACGCCATGCAAGGCAGGCCAAGCAGGTAGGAACAACAACGAGGAGTGAGCAGTTTGGGGAAAAGCTGTATTGGGTCATCGGAATTCGGAGGCCAGAGGAAGCTCTGTGGCAGTTTTTGGGCCGGATCTGCTAGGGTTTTGAGTAGGG
>DN93819_c0_g1_i1	len=468 path=[0:0-467]
ACATATGGTACAGATTAAAAATAGCTCTTCTTTGGTCCAAAATAGAAAGTCTTGAACCTTATCAAGAAGAATAGGGTGTCAAAAATTAATTCTTGCGATATTTGGTACGGTCACTTTAATTTCCAATCTTTAAAAGCTTACCTAGGTTGCACTGTTGCTGAACCAAATAGACTCCCAACTTCCTGTTCCTGCAATGTGTTTTCTTTGTCAGATATTTTGGGGCAAAACATGGAAACCCCATCTCCTTCCAAAATCATGGAAACCCCATCTCCTTCCTCCTGATCATCCAAAAAAAACTTATCTTTACAGTATGTGCCCTCAGCAAGGGTTTCTTACAAGAAAGAAGGCCAGATGTCCGTTGTGAAATGACATGTCATATAAGCAGATACCAAACATTGA…
>DN93899_c0_g1_i1	len=434 path=[0:0-433]
TCGGAAATTCCAAAAAGTCGACCATTACAACAAATGCTCATCATATTACCAACGATGATTTGAATTTTGGATGGAAAAAGTTGCAACTATTTTCCTCAACTGCCCACAACCTAAAAAGTGTTACAAGCAAGGATTTGAATTTTGGGTGAAGAAAATTACGACCATTTTTCTCAACCAACCAAACCCTAATTAACCCCAATTATTAAATTTTCAAACTTCATTCATTTGTATTGTATTGTTTGAGAACTAAAGTGGTGTTGCTCATACTACCAACCCACAAATATATATATATTCACAATGCACAAATCCAATACAACAAATGCTCATCATTTGAATTTTGGATTAGAAAATCGCAACCATTTCCCTCAACCACTTATTAAACTTTCAAACTTCATTCCC…
>DN93850_c0_g1_i1	len=438 path=[0:0-437]
TCGCCAAGTACAAGAGGTGTTTGTTCATGTTAAGGCCAAGTTTCTACAAATAGCATGGAATGATGCATGCTCTTAAATTAGTACCTATTACGTGAACGACTAGAAGAATCATAGTTATTAAATATTATATTATCCACGGTTCTGGTTACTGTCCGACATATTTGTGAGAGAAACATGGTTTAAAAGAAGGCCTTTCCCAGTCAATAATGAATCTGAGTGGCCCAATATGGTAATGTAACGAAGGTTGTGCTGTGGATGCGATGAATGCATGATGAAGATTCCTGCTTTATATCCTCCTTCAGTGCCAACGCAGGGCACAATTCCTGTTATATATACTATATTTCAATATTATGATTTAAAAGTATAATCTTCATGTTGTATGTGCTTAATTATTTTTTT…
>DN93879_c0_g1_i1	len=208 path=[0:0-207]
GTAATTATGTGGGGAATTGGCACTTGAGTGACAACTATGCCACTCTTTTGCTAATGAAATTTCCATTGATTACCTGAACGGGGGATGGAAGTCTCTCCAATGCTTCGGATTCAACATCTTTAGGTCCTATATTTGTTAATTTATATGCTGGCAGATTAGGAGCATGGCATCAGAGAGGTGTAGGAGGTAGAGTATTGTGTAATAAGTG
>DN93837_c0_g1_i1	len=222 path=[0:0-221]
GTTAATATAAAATGGACGGGAATCGTTACTTTTAAAAACATCAGTAAACTACACTCGTATCGATGCACCCACAGCATGACTGCACCGACTGACAACACCATTAAAAACCATCAGTAAACTACCCACATATCCATTGCATGCACAGCATGACTGATCTGATTGAAATGTGTATCTGACACGATTAATCAGTTTGATCATATAAATATGCTTACATAAGAATGA
>DN93815_c0_g1_i1	len=406 path=[0:0-405]
GCAAGTTGCTACTGTATATAGTTAGAGAATATAGTTAATTCGTAGAAATTCTAGACTGAGCTTCAAGAACAGATCAGAATATATTAAGATTAGTGATGTACTTTTCCAAGGTTTAGACAGAATGGAGTTGAATGTTTTCATGTTGATATTTCTGAAGTAATACAATTTCAACGATGTCTCTTTCCTTCATCTTTCTGTTAATAATATGTCACAGGGCATATGATAATAATAATTGCAGGTTCTAAACGAATACAACTCCTACAAGGCGGCTCTTAGTTGATTAACAATTATCTTGCAATGGACATAGTTTTACATCTACAAACAGATCATATAATGTGGAATTGACTGAAAAGCCTGTTGAAAAGTTGAGAACATTTGTTTAGTAATTTGAGCCTAAAT…
>DN93818_c0_g1_i1	len=258 path=[0:0-257]
TAGGAAAACTAAATTCAACAGGTATCTTGCATTATTTTACATGCTTAACAATGTTTGTATTAAAATCAGGATATATAACCAACCTATACCATACACTCTAGCAATTACTCTTGAATCTCGAGTCTCAACAGATAGTTTCAATGTATCAAGTGGCCTGATAACAGACAATGCATATCTCATTGCACTTAGATAACATGATATTTCATTTAAATAAATGAATATTCAACCAATAACATATTTGATATAAATGAATGCTGG
>DN93871_c0_g1_i1	len=240 path=[0:0-239]
GAAGAGATTTATCTGATCTTTCATTATGACAGTGCCTCGTCTATGGGGGTTTGCGGATGTGGAGTATCGATTCATATTGATCCTTCAGTGTATTACCATTTTACATGAAATGTTGGCATGGGGGAATATTGTAGAGCTGAATTAATTTCTCGATGGGGTGCCCTTCAATGTTCATTGTGGCTTGGGATTGACTCCATTCTCATCATCGGTGACTCTCTCACCATGATCAACTGGATATAG
>DN93877_c0_g1_i1	len=272 path=[0:0-271]
TACAAAGCGTACCACAGTGTGTGCTATCCCTTTGTTGTTATGGATAACACTCTAGCTATTTTATTTTGGGTTTTGTCGGGCTTTGCAAGATCTTAGGCATACCATTCTTAGCTGCTCTTTGCCTGTGCCAATAACGAATGAAAAATGAGAATAGATATTCTATGTTTAAACTTCAGAAGTATTAAGCTTCCACTCTTTGTTTTCAGCAAGTAAAGTTTTTTCTCCAGTTAGGAGAATTTTGGGAGATTGGAATAATATATGGGTTGGATGAG
>DN93893_c0_g1_i1	len=602 path=[0:0-601]
GTGTTTACAATTTTGTGTCCATGGAGTAACGGTGCCACCTTAACGTCTCATGAGGACCTTAACGATACCTTTTAATTTGGGCGGTAACAGGGGGCATCACTTCATTTGCAAGGGTGTGGTTTCATATAGAGGAAGATACCTTGAACTATTGTCTGGCTGTTACAGTTCTTTTGGACAGATTTTGGAACTCAATCTACAGGTGTTGTAAGGGCTGAAATATCTATGTATAGCTGCCATTTCATGTTTGTGTACGTTTCTTTTGCTGCAGGATATTGTTTGTTTTCATAGAGTGGGCTATTGGTAACATATGAGGGCTGTTAAGAGAGAGCCATTCATCCCTTTACAGTGTTATGATATCAGATCTGTAATGTGTTGTTTTAATGGCTGCTATTCAATAGA…
>DN93825_c0_g1_i1	len=228 path=[0:0-227]
GTTGCAGGCAACAGGTCATTCTCAAGAAGCATGATGGGTATGTGACTTATCATTATACAACTGTTTTTATTATGAACCTGTTGATGGGAAACCAAATACCCATGTTAAAAGGAAGAAAAATTGTATCACAGTGGCATATGCAATGAAGAGGAGGAAGAAATGGAGGGGATGATGAAGCTGACAATAATGATAAAAAATGAACCCAACAAGAGTTCAACACACGTGTGA
>DN93814_c0_g1_i1	len=248 path=[0:0-247]
CAAAAACAAATATTATAAAGACGAAATTGAATTCTAATGGACTTCCGAGTGAATGAATGCTGCACTACAGAATAATTATGTATGGCTACTAAAATGCAGAGGTACAAAAAAATCATAATAATATAGACGATGAAAAATGCCCCTCTTCACCTGCGCTGCTACCTAAAACACCAGGTATCTTTTAAATAAGGTTGTAAACACCAGGTATCTTTTAAATAAGGTTGTAAACACCAGGTATCTTTTAAATA
>DN93851_c0_g1_i1	len=309 path=[0:0-308]
AGAATAGACAAGCGTTTCTTCCAACACAAAGGTCACAAAATGAATATGCTGTCTCCTGTCTTTGACCTTCTAAAACTTTCCGCGGAGGATGGACTGTCTAAGGCCGCAAAGAAGAATATTTTTCAAAAACCATCTTGAGGGAGTTGAAGGTGGTCAACCAGATATAAATCTTCAATCCTTCTACAGCAGTCTCGTCCTGAATTTTAGATGCTTCAGATATTGTACATGTATGATAGGCTCAAGTCTTTGGAGAAAGAGTCTTCTTCAGATCTGCGGAATTGGAGAGTTGGCTCAATCTTCAACTGCACA
>DN82909_c0_g1_i1	len=558 path=[0:0-557]
GTCACTTCTAGATTAATTTGGTTGTGCAGTTCCCCCATAGAGAGTTTCTTCCCTTCATACAACCCATGATTTCTTGTTTGCCAAATTAGGGCTGCTATAGAGCATGTCACTTTGGCTGATTACAGCCCTTGATCCTTCATTAGAATCACCATCTAAATTTGCATGCAAGACCCCATATCCCAAGCAAATATACACATTGGTCATTCCCTTACATCTACAAGCCCCAACCATAAAAATTCAATCCATCTTTTCTTTTTCTTTATTTAAAATTGCTAAGCTATATTTTATTCCCACTCCACATGACAAGAAGTGAGCCTAGTAACCCATAGGGAAGCCCCCCTTGGCTAGGATTCCATTTTTGCTAGCCAAAAGTGCAGAAGAAAGTTGGTGAAGTGACAA…
>DN82983_c0_g1_i1	len=344 path=[0:0-343]
GCGTGATCGAGCCCGGAGCCATACTGCAGGGCATCCAAAACCTCTTTTGATTTTGCAGCATTAATACAAGGGCTGATGTCCCTTCCCGCTGCTGATTTTTTAAATTTAGAGGGTGCTTCTGAGAGAGCAGCAGCAGCGATAGTGGCATGGAATCTCCCACCTTTGCCAATGTTGTGGAGTATCCTTAATCTCACTATTACATTGTAATGTAAAGATAATGGAGGTGGCCATAGAATGACTGCCATGTAACTCTGGCATTGGTTGAAGCCATAAAAATTTGAATTATGGGCGAACAAGCAGTATTTATGCATACAAGATATCTGTACGTACAAGGATACTTGTCG
>DN82968_c0_g1_i1	len=253 path=[0:0-252]
ATTAAACTATTTTTTAAGTGTTGGCATGCATAAAGGGAAGGCAGATGATAAGGCTATCCCTCATCTCCAGAAATTGTTCCAGGTAAAAGGGCTTTTTTGGGTCAAGACCCTTTGAAGGTGCTATCCAAGTGGTCTAGGCATACTTTATAGAGACAAAGGAAGGTTTATGGAAGAATAGTGTGAAGCAGTTGCTAAAACAGTGAGGTGATGCTGGCAGGCCTCCTTGTTGCATTCTTAACCAATCTGTCCACCG
>DN82990_c0_g1_i1	len=317 path=[0:0-316]
ATTGTTTAATTCTAGAATTTGTTGAGACAACCTTGTTCCTTTGTTTCCTAATGTATCCGCTATGGAATTTAAATTCCTTAATACATGAAAGAGATCAACTTGTTCAAATTGCTGAAGTTGGAGAAGGATCCATGTGATGTTTAGCTTCCTATACTTGCCGAATCGCTATTATCGAGTCACCAAATATCATAATTCGCTGAATTTTCTTTTCGATGGTTAGATCCTAATCCCCTTGATTATTGGTGGCTGATCCCAATCCCCACACATATTGAGACTCAGTTTTTCCATTGAGGCCAAGAATCACCCCTACCACCCCA
>DN82955_c0_g1_i1	len=224 path=[0:0-223]
GTCAGATTGGAAACAAAACATTCCCAGGTGCTTTACATCCCAGGTGGAGCAGATGTCCATGCCTGTCTTCGTATGTATATATATTTAATGTTCCTCTTAGCATAAACAAGAGTCCACTATCCAGGTAGGTTGACTGGAGAAGTATTGCCTATTAAGAACTTCAATTTTTTTTAATCCTTCTTGGTGTTTAATATTAAGTTAACATTCTTGGTTGAATTTATGCT
>DN82978_c0_g1_i1	len=269 path=[0:0-268]
CATTGCTCTGAAGAGAGCCATCATTCCAGAAAACCAACTTAAGCCTCCTTCCAGAGGAGAAGAAACACATGACCATGTTCTAAAACCACCTATGGAGTCCCAAACATCCCAAACAAAACCAGCAGACCTGTTCGTCAGCAGCCGGAAGAAACCCATAACCCAGATGACTAAGAAGTAGCCGAGGATAGCCAAAACTTGATCAAAAAGGAGGATCACCTCCAGCAGAAGCATGCTACTCATCAGGCCGTTCCTCCACAATTCGGTACCAG
>DN82985_c0_g1_i1	len=250 path=[0:0-249]
AAGTTTGATTAGGTTAATCTTAACCTTAAGCCTAGTATATAATAAATGAAATAAACTATGAGTTTTGCCATGCTTACAAGTAAATAATGATTGGAATATGAATGGGAAATGGTCGCACGTATATGTTACACCAGGAATTTTAACACCATTAGTTATTGTGGCATAAGGAATCACAAGTTGAAATGTCCATGGCCAAGTAGACATTATTGAGTAGTAAACTAAATTATAAGTCTATAAGATTAGATGTACA
>DN82962_c0_g1_i1	len=268 path=[0:0-267]
GGACATGTGCATGCAGAAAGTGAAAAGATAGTTGTTGAAACGAATTTTTGTCTAGGAATTGGGAACACACTAGTCAGGTGGTGAAGTAACTTTTGGAATTAGAGAGATTCCACATGCCGGGTCAGCTTGCCAGATAAGTTCTGAACATAAATAAAATCTTTGACTCCCTTGTTTATTATGTATTCAAGGCAGAGAAATAAATTGGTTGAACTTACAAACTAGTGATATAGGTGCTATTATTATTTGAAACCTACAAATTGGTGATATA
>DN82925_c0_g1_i1	len=305 path=[0:0-304]
AGGTGAGCTTATGGGGTAGCGTTCGTTGTTTTAGCTACCTTAGGCTCTCAAGGCTTGCATGTTATGATCTTCATGCTTTCTCCCTCCTTTACCCTTGTATGGAAGCAGATCTAATTGAAAAAACCCCTTGTTCTTCTTCATTGGGGTTGGTGGGGAAGACAAAAGAACTGGATCTGGTCGACATTGATCAAGACAAGGTGAGTTTTCCAGATTTTTTTGAACTCTTTAAATGGGGACCCTGACCCTGTTTTGGGTCTCGGAAGAGGAGTATGTGGCAGATCTAATGCAGATCTGAGAGAAATAGT
>DN82902_c0_g1_i1	len=394 path=[0:0-393]
GTTGTCAAGAAACCTACAGGTTAGGTCTGTACAAATGTATATTTGTAATCAATGGTTTTGTTTGATCATATACAACTATACAAGTGTTCACGCTTGGAGTTGTTAATCCAATAGGACAAGGTATGCTTCTTATTTTATTTTGATTCAATGCATGATGCGATGTAAATAAGCAATATGCACTATATATATGTATATACAAATCAGAGACTGGTAAAAGGTCCAAGAATATGTGGTTGACAAGACACAATGTGAGGACTTCGGCCATAGAATGGACTTAATACTATGTTGCACTAGTTTTTGGAACATGAGAATGTTTGGAATGCATGGATTACCGGAATGCTGGCACATTTGTTTGGACTGACTAGAAGTATTGCCCAACTTTCCATGAAAAAGA
>DN82975_c0_g1_i1	len=228 path=[0:0-227]
TTAGATGGGCTGAATCAACTAGGTCTATTTGACAGATTGGTCAACTTTGATTGACAAGTTGATTTCCAGAGACAGGACCATTCAAAATCTCTTCCACCTAAAATTCTTGCATCATCTTCAAGGAAGATTCATTTTCAATAATTTATGTACAAGCTGTAAAAAAAGGAGGTCTCAGTTCTCCTGTCATATGGAAGGTATCTTCTATTCTGTGGACTTAGACTATTGCAG
>DN82912_c0_g1_i1	len=375 path=[0:0-374]
TAAATCGATTTGTAACACCCGGAAGTGCATGAAATTAATAAGGTTACTAAGTTAATTTTATTTTTTTGTTACTTCAAGTTTTATTACATTATGATGTGTAACAATAAGTGACTGAGGCTCGAAGGCCAAGAAAAATAAATTGTGGTTACCTAAATATTTGGTAATAATACCTTAACAAAGAAATAGAATTTGTTTACAAGAATTAAAAGAAACAGTTACAAAGAGAGTTACCCATTTGCCCTGAAGGGAGATTTGGAGGGGAGCAAAAGAATCCAGGAGGAGATCCTTGAGCTGGATGAAATAGACCTGTGGGAGAATTCTAAGTAAGACAATCAGAAAAGAGTAGAGGACTTGGGGCAAGATCGGAGTCCAGGG
>DN82980_c0_g1_i1	len=299 path=[0:0-298]
GACAAAACCCAGTCCAAATTGTAAGGTTGTTCTATATACTTATGTAATCCTAGGATTTGATTCTTTTCAAAATCAATTCCATTCAAAGATCACATCCTATGACCAAATCCTACAACATTAAATTACAGCCATAGTTTTAAAACTGGATGTGGGTTTCGAACCGGCCGCCTATTTAACCGTGATTCGAACCAGAATCAGATCAAACCGGATTCAACAAACAGGAATTGGAAAAAATACATAAAATAATTAATTTTTAATAAAAAACTTTTTTCTAAGATTACAAACCAGTAGAGACAAAA
>DN82942_c0_g1_i1	len=368 path=[0:0-367]
AAATAGTAGATCAGTACACCAAAAAGAATTGCCTGTAGAAAATAGGCTTTCTTTGAGACCTAGAAGCAAATATACCAGACTCAAGGTGCTTCGTCTTTTTAGCATCTCGGGCTAACAAAAGCAAGGTTGATTTGTCATGGTCTAGTGGGCCTGGCTTGTCTCCATGGGGGAGTAAATAATAAGGCACGATTTTTCAGTCGCATAACTTATCCGTCCAGGCTGATTGTGACAAGGTTCCTGACCCTCCCAAGATCAGCCTATCGGAGTTGGCTAGTCGAGGTTAATTAGTTTTTGGGAGAGTCAAACATATCAGTTATCTCTATTCATATTTTAGAGGTGTTGATGACACGAATTTTACCATTTGAAAG
>DN82934_c0_g1_i1	len=204 path=[0:0-203]
TTTTACATATGACCATGACCTTGCAACATCTATCAGAAGGAATGTGTATCATCTACAGTGGTTCCTGTTTTTATTTTAACGACAACAATCATAATTTTATTAAAGAAAAAGATGGGGACTATGGCCATACTTGTACAACCTGATATAATGAACATAGGGGAGAGATTGCCTCCAATTCTTAGAACAAGGTGGATTGAAAGGGAG
>DN82966_c0_g1_i1	len=426 path=[0:0-425]
TTTTTCTTTGCTTGCTTGTTTTTTGTTTTCTCAAAAGAATTGTAAAAGTTTTTAGGAATTGTTTGATATTTTTCTTTGATTTTTGCTCCTCTAATAGCATCCCATGGTGCATATCATCAATGTTAGGTTTACCATCTTTAGGACGGGTTGATCACAAAGATGAATTCTTTTGGAACTTATTGTTTGTGCTTTGATGGGAGTCACAATCCTTACTATTAATAATGAATATTAACATTTGATATAAATTGCGATATATGTATTGTGTAATTGTATGATTTATATAACATTGGGCACAACATGGTTTTGTTGCTTGAGTTGTCTGAATGATGTTTTAGTGTATGAGCAATCATCCTCTTCAGAGCAAAATATCATATTCATTAGTTAGTTTGGTGACAAATG…
>DN82935_c0_g1_i1	len=240 path=[0:0-239]
GGAGATAAATCACACTACAATATCGAAAACAATCCACCGAGCCATCAAATTGGCCCCAAGAAAAGACAGACAAACAATATTTTTGAATGAGAAATAGGACATTGTTGCTGTAAACGCTTTTTACGGTCGGAGAAGTGCCAATACCAGCGACCAATCTGAAAACATTAAAACCTCGCATCATGAACACAAAAGTTTACAAACTCGGGGCCAACATTCAAAGCCAACGATAATCCCCTGTCC
>DN82908_c0_g1_i1	len=579 path=[0:0-578]
TGTGATTTCATTGGTTATTTCCATTTTCATTTGATATAAAGGCGGTAAATATGTACTTGCCCTTGTCAGTGCGTATAAGCCTGCACCTTTCATAATATGCAGCTCATTCAGTCCTATATGTTTATTTACTGCTGCTGACTTTTTATGGCTTACAAATCAATGTACTCTATAGGTCCCATTTGATGGATATTATCTTTGTCACGCCCTTGTATTTTCTTTTGTATGAGCAAATATGAGTGCTTCAGGGTCATAAACTATTAGTTCATCAAATTTGTTAATCTATCTAGGACACGAGAATTGAGGACATCAACCTCCTAATTTTGTTGAATTGTTCACACGTTTTTTCCAAAACTTCTAGCTTGGTGCATAAAGCTTCAGTTTCTTCTCAGCTACGTGTCA…
>DN82979_c0_g1_i1	len=331 path=[0:0-330]
GCTGTTATAGTTAGAATTGTACTGAGCAGTCTAATAATACGATTACGGTATAAAAATTACAATCATACAGTAAATATATTTATTCGAATATATTGGTTTCCTTCTTTTCTTCGTATCCAGCAATTCGACTTACAGCGAATATATTTGCTGGAACATTCACCTGCGGTCAATTTCAATTTCACATGGATCTATTGAATACAGTTGTCCCTAAAGGGAAGTAGTGGATGAAAAAGTTTGCATCACTCCAATCATGACGTATTGTTAGCAGAGTAACGTGGCCAAGTAGCACCTGTAGGTTAGTTTTCGGGTATCTATCTCAAACATGTATTGT
>DN82941_c0_g1_i1	len=218 path=[0:0-217]
TGCACTTAATGTGAAGAAGAACGTCGGGCAACCGATTGAGATATCATGTCGGTTAGTTCGTTTTTAGCTTTGTGCCAAAATGACCTTGTTCCACGCAAAGAGCTACCGAATCACATGACTTGCTCTGCCAATTGTTCATCTGGAAATTGTTCTAATCGGATGTTCAAATCTTGAATAGATATTGGAAAGCTATCTAAGATGTTTTTTTCCACAAAAAA
>DN82928_c0_g1_i1	len=409 path=[0:0-408]
GCAGACTTCATAGGCAATTAAAATGGTAAAACCCCGGCAGAATTGATGCTAGCATCCAGCAGAACTTACAACACTACAAAAATTCACACAGCAGAATATAGTGATCAAGCATACCTTAAAAACATTGGTCCGTGAAAATGGCAATTGCTGGCAACTGCTCACAAACTCTCACTCTGCTACTCACAATGCTGAGATGACCAAATGCCGACAAAAGCACCTCACACCATTTCTAACAATGCACCTCACTCACAGGTGATTCTTCAATGTACCTCAGCCCTTAATTGTGACTACTCAATACACCTTGACCCTCCTCACATCAGACTCACAATGCATCTCACTCACACAACTCACAGTGCAGCAAGATGCCAAACAATGTGTATTCTTCATGATGTGGTCACT…
>DN82965_c0_g1_i1	len=974 path=[0:0-973]
GCACAAGTAAAATTTGCCAGCACTTCAATTATATTGAAAAATCCAGACTTCTTTATTAATAAAATTCTGGAGTAATTTTACATAAATTCAGGGGATAAAAAACTGGAGAATATATCTCTGAGATGCTTGCCCCTGGATACTGTGACAATTCGTCCTTTCACAGGGAATTTCAGTCGGACAATTTGGCCCTATTATTAATGAAATTCGGCCCTTCAATGAATCAACTCAGCCCTACGATTTCACCTCAGAAAGCTCGGGAAACTTGGATCCTACGCTGTTGGTAAACTTGGCCCTGGAAGAATAGCAATTCGGCCTCCAAATCGGCTATCCTCAATTTGTCACATCCCCTGCTTAAATCAGCAACTTGCTCAGGTAACTTGGCCTCCTTGGCAATTCAAC…
>DN82986_c0_g1_i1	len=215 path=[0:0-214]
GCAAACATCTGAAGTATATATGTGCACAAATTTTCTCTTTGTTAGAAAACATCTCTCTCAAGAACTGAGCCATGGCCCAACAGCAATCTAAGATGACTGACACTATAGTGTAATAACATTTCCTCGGATAATGCAATCATATGATTTTGAAACATGAAAATTTGAATAGCACCTCTCGAAGAAAGTCCCAGAACAGTCATATTCTTTGCCCAAGT
>DN82952_c0_g1_i1	len=440 path=[0:0-439]
GTGCAAGTGACACTTATCACAGTACCCCGCCTCTGATAATTTTAGGAATAAAAAGAAGTAAAGGGAGTTCTTTATCCAATCTCCCAACACTCGTCAATCTCCCATTCACTGTTATTTCGTCATATCGCCAACCCACAATGATTTGGGGCGATATATACAATTTCTATCTATAGTACTAGTATGCTTTTCTTCCTTCTACCAAAGCTGGCTGGAGGTTCCTAAACTACTTTCCCCGACTATTATCAAAACATCATTCGTCTTCCTTGGTTACTCATCTATTAGCAACTTCGTCAACCACATATATGGACTGGACCTCTTGCCAACTTAAAACTTCGTATACCCTGCCAAAAAGGCCAGAATGTTTTGTGCCCTTTTCACTTAATATAATATCTGCTTCCT…
>DN82920_c0_g1_i1	len=427 path=[0:0-426]
AATTTTCTGGATTTGATGGTTGACATGATTCACCACAGTTCAGGGTTGACTGGCTTTGCATAGAGTAATGGGCAATTTTGATTGCGCCGCATATAGCTAATTGCGTATTTTGCATAGACTAAACTTGGGTGTCTTAGATGATTTTCTGGAATTGATGATTGACTTGATTCACAGAATGGGGTTGACTGGCCTTTGCATAGACAAATGGGCAGCTTTGATTGCACCGCTTACAGCTAATTACGCAAATGTGCAGCCATTTTTATGTGATTAAGAAATCCCCATTACTTTTACCCTTTGATGGTTGACTTGGCCTTTGCATATAGTATATGCCTTTGATTGGCCCATATACAAGTGCGTGCGTAAAACTGGTTGTACCGTATGTGTATTTTGAATATATCT…
>DN82931_c0_g1_i1	len=269 path=[0:0-268]
GTTCGGACAATCTGACACTTGGAGTATCTGATACAAATTGAAGATGGTTGGTTCATATGGTTAAATTTAGTGACAGATGGTTGGTGCATATAGTTAAATTGGCCAAAAGGTAATGTGAGAATTCAGATTAAATTGGATGATTTATGCTCACTCGTAGATGGCTACTTTCCTCAACAAATATAACGTCAGTGACAATGCCAATCACGTGTCCATTGCCACTAGAATGTCAACTGGGAAGGATTTAAATGCCATACACTAACTTCCCTATA
>DN82957_c0_g1_i1	len=206 path=[0:0-205]
TAAAATTAGCATGAGCATCCAACAATCTTTGTAGACCCTCAAAAGAGGGGACTAGCAAGACCACATCATTTATAAACAGAAGTATAGGAATCAAAACATGATGCAAGATAGAACCATTATCATCATGGTTAGTGGTTTTAAGAAATTCCTTGAGTTCACTAGTGTATAATAAAGAAACCAAATATAATGAAGCGAGATTGAACAGG
>DN82923_c0_g1_i1	len=301 path=[0:0-300]
AGCAGGACCCAGTTCAGATTCTTGATGCTTTGTTGCCTCTCTATTTGAACAGTCAGATTTTGAGGGCATTGCAGGAATCACTAGCGAGTGAGCTTGCTGCTAGGATGAGCGCCATGACCAGTGCATCTGATAATGCATCTGAGCTAAAGAAGTCCCTGTCTTTGGTCTACAATAGGCAACGCCAGGCCAAAATTACAGGCGAGATATTGGAGATTGTTGCTGGTGCCAATGCTCAAATCTAGTGAAACCCTGGTTCTTGTGTCCACCACAGTTTGCTTCTTAGTAGGTACTTTTATGGGGG
>DN82997_c0_g1_i1	len=235 path=[0:0-234]
AAGTAATTGGAAACAAACCGTAACAACAGTGCTGTGTATTGACAAATAACAGGTGTAGAGTTTAGAAATCATTAAATGCACCAGGATGGTGGCTCAAAATTTGGTTTTTATCCTGCAGGTTGGAAATGTTAATGTAAATGTTGTTGGTTCTCTGATGTCTGTTAAACCACAACATGTATTTTTTCCATTGCTTATGGAACAATGGTGTAAATTTACTTTCTGAGGAGCTTGGTAG
>DN49675_c0_g1_i1	len=1140 path=[0:0-292 2:293-1042 3:1043-1053 4:1054-1118 6:1119-1139]
GTTGTGAAGGAACAAGGAAAATATTTGCCTTTTGTTGCTTTTATGTGGCAAGCATAGTATTTATGTTCTTGAAATTAAATCTATGATACCCCTTATGGCAAAGGGTGATGTTGAAAACTAATCCTAAAGGAAACATTAAATTGCATACAATTAAGAGCAAAATATTCACTTATTAATAGAGAGAATTAGCAAGTGCCATTGCAAATGAAAAACTAGCAAGAATTTTGATTATTTTCCTTTAAGTTTTAGACTAGTGTTGAATATTGTGCCTCCACCTTTGCTTTGAGATGTGGGAGGCTTTATTTTCAAGGTTCTACATGAAGCTATATATATTTCCCCGCAACTTCGACTTTTATTACTTTTGTAAATATTAAGAACAAGGAAATATATTTGAAAGAA…
>DN49675_c0_g1_i2	len=1131 path=[0:0-292 2:293-1042 4:1043-1107 5:1108-1130]
GTTGTGAAGGAACAAGGAAAATATTTGCCTTTTGTTGCTTTTATGTGGCAAGCATAGTATTTATGTTCTTGAAATTAAATCTATGATACCCCTTATGGCAAAGGGTGATGTTGAAAACTAATCCTAAAGGAAACATTAAATTGCATACAATTAAGAGCAAAATATTCACTTATTAATAGAGAGAATTAGCAAGTGCCATTGCAAATGAAAAACTAGCAAGAATTTTGATTATTTTCCTTTAAGTTTTAGACTAGTGTTGAATATTGTGCCTCCACCTTTGCTTTGAGATGTGGGAGGCTTTATTTTCAAGGTTCTACATGAAGCTATATATATTTCCCCGCAACTTCGACTTTTATTACTTTTGTAAATATTAAGAACAAGGAAATATATTTGAAAGAA…
>DN49655_c0_g2_i1	len=1021 path=[0:0-1020]
GTAATAAAATCCTTAGCAGTTGTAACAATAGTACAGAGGATAGATGTAATCCTACAAATAACAATAATTCTCAGTTTTCTAATATGACACTCTCCAGATAAGACTGCCAAAAATACAATGGGCGATGTGCCTAAATTAGAAGGCTGAGACCAGAGAAAATTGTCTTCAAGTTCTACTAATCCAAGGGTACATAGCTGCTAACGAAGTACAAATTAGTCTTTTGGCTTTCTGTAGTTAAAGTCATGGTATGGGCCCACGAATCTCCTGTAGTAGAAATCCTCTAGGAGTAGAGTGCTTCAACTAGAGGCAGAATGCTTTGCTAACCAGAACAAGTTTGAAATGGAAAACCACTGGATTTCCTCAAGGCATAAGAATAGAACCTGTATAGTTTGCAGTATG…
>DN49637_c0_g1_i1	len=1504 path=[0:0-386 2:387-1503]
GCACTAAGTAGTAAGAACATTACAGGTAAAAATAAAAGCTTTCATTGGATTCAAACTGTTACTTAAATATGCTTCTTTTCATTCATAAAACAATATGTACTTAAGAAATATGGTTTGAAAAAGCAAGCAGGTGACCTGCCACCAAGAAGCTTTCAACTGGTTAATTAACCATATACCTTCCTAGACTAGATATACAAATATTGTTTTCATTACAACGGATCAGCACTAAGGCCATTATTTAAGGAGTGCTCTGGAAAACGAAAGTATGCCATAAAGGACAGGACAATACATTCAATATTTACCTGCAAGCCACCAAGCATTAACCACTGTATAATTAAAGGTCAAAGAGCCCACCGGCTCAGGCTCAGGGCACCGACCAGTACCTGCCATAGCAGAAGA…
>DN49615_c0_g1_i1	len=1038 path=[0:0-1037]
GGCAAATAAAAACCCAGAGAAACAAAGAAAGAAAGCCTGAACTTTCCAAGAAAGACCCTGGGAGAAAAAAAAAAGAAAGAAAGAAAAAAGAAAAAACGAAAAAAGAAAAAAGAAAAGAGGAATTATATTAAAAAGAAAAAAATTATAAAAAAGTGCCAAACTATATTATAAAAGATGAATATATATATTATTTTTTTAAAGGGTTATATTATGAAAACAACAAAAACATTATAAAAGAAAAAAAAATTGGCCCTGAAGCTATTTGCAGCTGCCATGGTTCCTTGTTCCACTCCCATCAACCCTTCCATCCGTTTTGTACCCTATTAATTGCACAATAGCCACAAAGGATGTCACTTCCTTAAAACTCAGAAGTTCATTGAAACAAAGCCCTATCATTCC…
>DN49612_c1_g1_i1	len=215 path=[0:0-214]
CGTAAATAGGGGTTGCCAGAATAACTGCAGCAGATTTTTCAGGTGTAAGGTTACTTCGAACTATCAGTCAAATCATAATTATTATCCGTACCATTTTTTATTATAAAAATATGAGAAGAAATTCTGAACCTCGAAATCCTAATATGTGGTTTGCGTCTAAACATAAGGAACATAGAATAGGATATCAGTACTTGAGTTTCAATGAGCAATTGTGG
>DN49614_c0_g1_i1	len=1149 path=[0:0-1148]
AATGAAGTATGATCCGGGGCAATGGAGCTAGGGTTCCTGATCTGGTTTCTTCGTGGCGTATTGGTTTAGCAGACCTTTCACAATGCCTACCTTCGGAACTGCTTCCCTAACCTTCACTGTCATCGACTGACCGCCTTCCTGCCCACTTTCTTGTTGTTCCCTTCCCATGTCTTTCCCTAACCACAGTTGTTTCCGGTAGCGCATTTACCTGGACGGTTTTACCCTTCGCCGTTCAACCCTTCACCATTCACCCTTTGGTTTCCATAGGCAGCTGTCAACTAAAGGTTGTGACAGTTATGGAGGATAACCTAGACTATTCAGCTGACCCGTCGAAAGGAGAGCCCATTTGGACAGAGGCCAGGACCACCCTCAAAGGTTTTTTCTCATTTGAAAACAAGC…
>DN49648_c3_g1_i1	len=341 path=[0:0-340]
AATCTAGGTGGTGAAACTCGGAAGGTACTTTACAGGACAGGACCTACTTAAAAATATATAATTTGGATTTGTTTCTGATATTGGATTGTAGCAATGCGCTTGTTGTATCTACACAGCAAACTTCCTTAGACCATATCTTATTTTCAATTTTGTCATCAATAGTTATTGGTAAACTAGGCAAACTGTAGGCTTCCAGATAGGAATGAATGTGCCTCTCTTTGCTTTTTAGTTCTTGAGCTTTTATTCGCATGTTCTTTTTTTGATATTTGTGAATGCAAGGAGATTAATAAGCCTGATGTTCTCTTTACTAACATGACAGAACGCAGCATTTGCTCCATACA
>DN49689_c1_g1_i1	len=236 path=[0:0-235]
GATGAAGGCAAACTTTTGAGGGAGAGCCCAGTATCATATTTTGATAACCATCAGGAAGCACATGTTGATATACAAGAAAGGAACCTGTCATTGGAGACAAAGATCATATGTACTTAACAGGAAAGCTTTGGAAGCCAGAAATATGAGCATATTTACTGTGTTGGATAAATCTAGCAGTCAAAGGAACAGTTTGGAGGCTTTGAAACTAACTAGTGGATGATAGTTGGGTTGATGAT
>DN49622_c0_g1_i1	len=676 path=[0:0-537 1:538-654 2:655-675]
TAAAGTTGGTTTAGCATTTTCTAATGCTCTATTAAAAAGGTTAAAAATGGAAAAGTAGTAATTTTTAAAATGATTTTAGCTGCTTGATAAACTATTGCTAGATGCACAAATGGCTCATAGAGGGGTTAAAATTATTTTTCCTTTTTCTCAATCAGTTGTAAAGCCTGTAGAACTTCAACTTGAGGAGCATTACCTTATGTATAAACTTAAAAAGTTATATTAATTACATGTTGCAAATCTCATCTAAGAGTTTCCAGCGCTGAATGAAGAATTTTGCGACTAGGATTTGCAGTGGACCATTTTTCCTAGATGTATCTTAAAATCTTGTTTCAGGTTTGTTCCTTTCTCAGGAAGCGTAATATATATGGACTTGTTCTCTATGAGCAAATCACCGCCCAT…
>DN49622_c0_g1_i2	len=559 path=[0:0-537 2:538-558]
TAAAGTTGGTTTAGCATTTTCTAATGCTCTATTAAAAAGGTTAAAAATGGAAAAGTAGTAATTTTTAAAATGATTTTAGCTGCTTGATAAACTATTGCTAGATGCACAAATGGCTCATAGAGGGGTTAAAATTATTTTTCCTTTTTCTCAATCAGTTGTAAAGCCTGTAGAACTTCAACTTGAGGAGCATTACCTTATGTATAAACTTAAAAAGTTATATTAATTACATGTTGCAAATCTCATCTAAGAGTTTCCAGCGCTGAATGAAGAATTTTGCGACTAGGATTTGCAGTGGACCATTTTTCCTAGATGTATCTTAAAATCTTGTTTCAGGTTTGTTCCTTTCTCAGGAAGCGTAATATATATGGACTTGTTCTCTATGAGCAAATCACCGCCCAT…
>DN49657_c2_g1_i1	len=213 path=[0:0-212]
GGAAATTTCAGCAGAAGATTCTGGTTCATCTCTTTCATCGTAGCTTGGCTTTTACAATTGCAATGTTTAAAGTTTTAAATTGGTTATATGCTGCAGTTTTACTGAGTATTTCAGATTATTTGAATATACAAAGGTAATTTTTGTTAAAAAGCTTTAGTCTGGGAAGTATTTCCTAATGTTACCAACACAGGCAATGAAGATGGCAGTGAGGAA
>DN49645_c0_g1_i1	len=1062 path=[0:0-1061]
TGTGAATGCTATTTCTATGGATCTTTATCCTGTCATTGTTACTTCACACAGCCACTATTATAACTGCAGATGCTTAGTATATTTCCAGATTGGCTGCAAGGGACTCCTACGTGGTTTTCAACCTTTATATACAAATTCTGTCAATCTGCAGTCAGAGTTATGCATTACACTGAAATTGTATGTCAGATAAGAAGCGGCTTTGTTTCTGTGGCAGCAATTGCAGGCATGGGACTTTGCCATTTTGCATGTTGCAGGGACTTTGCCAGATTCTGCAGATGATGAAAATGGACCCCTTCCACCCAATTTGGTCTATAGTGAAAAGGCTTATAAGGTATTTGAGGTGAAAACCTCTGATGAGGAGGAAGTGATTAGCCTGTGTGCTGGGCTGGTTTGCATTGT…
>DN49651_c0_g1_i1	len=257 path=[0:0-256]
TGCGGCTTCTTAATTCCACGTCCGGTGAGAGTTTCCGTCAATTTATATTGATTGTAGATTTAGAAATCTAGATGGTAGATTTCTCGATATAGAGATTTTAATTTTAAAGTCGGCAATTAAATTAAAGTAACTACACAATACCTTCAGATAATCAAAATCTACAATTGGGTTAAACTCAAGTCTCCACTCTCTCATATTCACGTGGATGGTTTTGTTTCGTGACTGACGTTGCAGCGGATTCCTGTGTGGTGGAGATG
>DN49696_c0_g1_i4	len=980 path=[0:0-103 1:104-138 2:139-194 4:195-269 5:270-300 6:301-354 8:355-823 10:824-979]
GGCACCAAATATGTGAAGTTCATTGCATATAACGGTGCAAATAGAAAAAGCACATCTATATATCAGTTCAAGATGCACAAAACAAATAACCTGTGAAAAAAATACATAACATTGACTCTGAATGGCCTTGAGAGACCAAAAATCATCATACTATAATCAACTGACTACATAGATGATATCATACCATGTCATGAGCCATGGATTCATAAAAATCATCAAGATCATCAACAGTAGTGTCAGTTGAATCCTCTGGATCAACCTCATGGTCCGCTGCATGGGTACCATCCTCAACCTGTCAACTTGATGCACTTGATGATCCAAGACCACCACCAACAGCACCCATATCTGTTAGTAGAAGTCCATTCCTCCAGAGGAGGATATTAAAGCTTGTAATGGACA…
>DN49696_c0_g1_i5	len=945 path=[0:0-103 2:104-159 4:160-234 5:235-265 6:266-319 8:320-788 10:789-944]
GGCACCAAATATGTGAAGTTCATTGCATATAACGGTGCAAATAGAAAAAGCACATCTATATATCAGTTCAAGATGCACAAAACAAATAACCTGTGAAAAAAATAAAATCATCATACTATAATCAACTGACTACATAGATGATATCATACCATGTCATGAGCCATGGATTCATAAAAATCATCAAGATCATCAACAGTAGTGTCAGTTGAATCCTCTGGATCAACCTCATGGTCCGCTGCATGGGTACCATCCTCAACCTGTCAACTTGATGCACTTGATGATCCAAGACCACCACCAACAGCACCCATATCTGTTAGTAGAAGTCCATTCCTCCAGAGGAGGATATTAAAGCTTGTAATGGACAATATAATGGTACAATCAGATCACTACATAGATGAT…
>DN49696_c0_g1_i6	len=681 path=[3:0-90 5:91-121 6:122-175 8:176-644 9:645-680]
TCATGGATTCATAAAAATCGTCAAAAATCCAAATCATCAAGATCATCAACAATAGCATCTGTTAAATCCTCTGGATAAATCTCATGGTCCACTGCATGGGTACCATCCTCAACCTGTCAACTTGATGCACTTGATGATCCAAGACCACCACCAACAGCACCCATATCTGTTAGTAGAAGTCCATTCCTCCAGAGGAGGATATTAAAGCTTGTAATGGACAATATAATGGTACAATCAGATCACTACATAGATGATATCATATTATGTGAGTCATGGATTCATAAAAATCATCAAAAATCCAAATCATCAATAGCATCTGTTGAATCCTGTGGATCATCCACATGGTCCGCTGCATGGGTACCATCCCCAGCCTGTCGAATCAATGCACTTGATGGTCCA…
>DN49696_c0_g1_i3	len=1006 path=[0:0-103 1:104-138 2:139-194 3:195-285 5:286-316 7:317-380 8:381-849 10:850-1005]
GGCACCAAATATGTGAAGTTCATTGCATATAACGGTGCAAATAGAAAAAGCACATCTATATATCAGTTCAAGATGCACAAAACAAATAACCTGTGAAAAAAATACATAACATTGACTCTGAATGGCCTTGAGAGACCAAAAATCATCATACTATAATCAACTGACTACATAGATGATATCATACCATGTCATGAGTCATGGATTCATAAAAATCGTCAAAAATCCAAATCATCAAGATCATCAACAATAGCATCTGTTAAATCCTCTGGATAAATCTCATGGTCCACTGCATGGGTACCATCCTCAACCTGTCAACTCGATGCACTTGATGGTCCAAGACCACCACCAACAACACCCATGTCTGTTAGTGGAAGTGGCTCCAAGTCCATTCCTCCAGAG…
>DN74460_c0_g1_i1	len=729 path=[0:0-728]
GAAATGACAAAAATATATAAATTTCTAGGCTAGATCTAGGATTCCTCATTTCTATTGAGATGGCTGTTGGCTCTCTACTCCATATAAGAGAAACATCTCTAAATGTAAACATTGCTAGAAGCTTGGTGAGAAAACACTTGTCTACTTGTTGGTTTATGATATGGATGGTTGATTAAAGCACTCTCTTGGAGAATTTATACGTTTGGATGCTTATGTGATGGATGAATGCTGAATGAATGGCCTTGTGTGTCAATATCAGGATAAGTGCTTTCTAAATATTTTGTGGAGTTTATTTTGGAATATATTAAGTGTGGTAATATTTCTCAAGGATTTGGTTATAAGCCCATACAACCCTCTTAGTATGTTGCTTGATAGAATCCCTTTCAAGATTTGTGAAAT…
>DN74443_c0_g1_i1	len=279 path=[0:0-278]
GCTCATCAAAACCTTCCTCGCTGCTCCACACGTAGTCCTCCCACCATCGCACCATCTCCGCGCTTTCCATCCTCCACTACCCTTGGCTTTCATTCCCGTGAGCTATTCTCCTTTCCCCTTAACCGTATATGCAGCCCCAATCTGTTGCCTTATTCTCCTTATATGCAACTCCTCATCCCCTGCATCTTCAGTTCCTTTTTTTTCTTTTTAATATATTTCGTTTGGCACGGTTAGGTATTAGGTTGCTTTTTTTAATTCGATTCATTTTTTAATTTTGGG
>DN74433_c0_g1_i1	len=270 path=[0:0-269]
TTAGGTCAAGACTGACCACCACATATTGTAGTGGGACAGGTTCTGCTAGTGATGTCCCTTATAGGACCGAAAGACTGGGAAGCATTTTATCTAGATCTCCTTATCTACAAGATCGGAGGGAGATTTCACTCTCTTTTTTGGGTCTCTGGTAGATCCTTGTCCATGTTCTTCCCATACACAAACCAATGTTATCTTGCTCTCTTCATGAGAGAGGTATAGGAGAACGGATGCAAAACTCTTCATACATCATCTAGACTGGATAAACAATCG
>DN74488_c0_g1_i1	len=247 path=[0:0-246]
GGATTCTTTTGGCAGTTTTTAATGCTTTACATGATTGTATTTCAAGCTAGGTAAAAGTTTATAGGAGACATTGGACACTTATCTTGCTGTCCAACCATGTATGGTGTAATCAATCAATCTTGCTGGCATTTATTTTTAAGCCAAGTAGTGGTCTTAAACTTCCAAACAAGGAAAAATAGAAAAGAGAAAAAATAAAAGTTATGAGGAAGCTCACTGGTAGCAAGAGTGGGAAGCATAAGCTTGAGCC
>DN74449_c0_g1_i1	len=267 path=[0:0-266]
GGAAGGCATTTGTCAACACATGTGGAGGACCCGCCCAGGTTTGAAACTTGGTTTAGCTGTTTAGCGAGGCTTGTGAGTGGTTTTGCTAGGCTCACGAGTATAGTGACAGTCCTGACTCCTACGGACTCAATCCCAGGTCTCCTGATTAAACTATTTGGCTCATGAGTATAGTCACAGTCCTGACTCCTACGCACTCAATCCCAGGTCTCTTCAGTGACAAGCGGCAGGTCTACTAATTCTCTTGATTAAACTATTTTTCAAGTGTTG
>DN74446_c0_g1_i1	len=243 path=[0:0-242]
GTGCAAATCCTCATGCAATATGAGGGATAACAATCAGCATCGCAAAATCTTGAACATGGGTCAAAGTCAAGCTGGCAGAGTAGAATACTAATAGCACCATATCTATTGAATAGCACTGACCATCCATGTGTGCATGAATTTATACAAGTACTCTTCCAGGCTCCCGCTGACCCTGTTTCTCTCTAAGGTCTTTTTATTGATTATTTTTTGACCATTCTAACCTACATTACTGTTTGGCTCGCG
>DN74468_c0_g1_i1	len=282 path=[0:0-281]
AAAAGCTCAGATAAATGATTTTATTAGTATAGTTACATGGTTTAAGATACCAATCTCAACTATCCCATTTTATGTTCACGTTTACTACCTAGACTTTGTCCAAAAATGGCAAGGGATCTTCTGAAACAGAAATGTATGTACTAGTTAAATGGGACAAAGTTCTCTCTCATCTAGGAGAGTTGCCTTTTGATGGCAATAGTTTTGGTAGTAACTTTGTCTATATATACTCCTAAGCCACAGTTGAAATATATATATTCACACTTTGGATACCAAATTGAAGAG
>DN74472_c0_g1_i1	len=258 path=[0:0-257]
GGGGGCTTTCGTTTACTGGCAATGTGGATGGATTACTAAGCCACACACCATGGTAACATTCTCACTGGGGTCTGCCCCACATAAATATCATGTTCCAAAAAAGGATGGGCTGGGTAAGAGTTCCGGGTGAATCTGGTAGAATAGATACTGCAACCTGCAACGCGAGAAGGAGGAAGTTCGTGTTGTACAGTGCAGCCCCCGGCCAACATCGGGGTGTGTTTCAGTTTTCATTACGTTTCCGATTCCGATAGATTGTGC
>DN74489_c0_g1_i1	len=212 path=[0:0-211]
GCTAACTTAATAATCCAACCACTACAATAAAGAATGAATCCCTTCAGAAGAGTGAATTCACTAGCCAACCCATCTTGTGTCTATTCCAACTAAAATCCTAGCAGTAGATGTACCCCATGAATCATTAATACTTATGTTTGCCTTCAAAAATGACGCGGTGAATTTTCAATCGCTTTAAATATGTCAAAGCAACCAACAATACACTAGATGCT
>DN74404_c0_g1_i1	len=346 path=[0:0-345]
TCCATTTATTGAGTGTAAAGAAAATAAGCCCTAGAAATCAGCCTACTGTTATCCTTGGAGGAAGGGGGACATAAATTGTTTCGGTATTGGGTTATAAAACCAAGATGAATATATTTTAGGCCCAAGATCTATGACAATGCTTTTAAGTTTTGAATCTTGGTGTGCAGTTTTTGTTCACTTGAGTTTTGCGTCAGATGCAGGGGAGGATACAGCAGAAATTGTCAAATTCATCGTAGCAGCCATTGAGACACTAGGCTCTTGAAAACGTGTGTAAAATGACAAATTTACGACGAGAAGGCAAGAGAGAAATAAAAGAAGAAGGGACAGGAAAAGGAAATAATTGAGG
>DN74483_c0_g1_i1	len=338 path=[0:0-337]
AAGTGGCCTAGTTTGGGTGGATGCTTGGCCTTGAAGAGAGTGCTAGCATCACACTCTTACCTAGTAGGTTGTTACCCTAATTGGCATAATAGCTAACACATTGAGTGCAAGCAAAGGGGAGTTGGTTGCTTTGATTAGGAGAGGTACTGACCTAGGAGGAGCATTAGGAACTTGGAGGAGGGCTTCTAATCCTAAGAGCATGGACCATATGATATACACCTTTGAGGCTGGACACTTTGACTTGAGGACACTTGGATTGAGGAGTATACCTAATTATTTTGTGTATTTTTAAGTGGATTGAGTCATTGAAATCAGATGGCCTGAGTCAATCTGAGTTT
>DN74429_c0_g1_i1	len=212 path=[0:0-211]
TATATCCACAGGCCCTATCTACGCATGTGGTAGCTGCAGTAGAGAGAGCAAGTATGAGATAGAGCCGTAGTGGTAAAGTAGTGAGTCAAGAAAGAATCGCAGGCATAGAAACACAGTTCTGTTCATGTGATACCTAGATACGCTGTTCACATAGTCATAACTGCAGTCATGAAGTGAAGCTGAAGCACAGTTGGCGCAGTCACAAAGAAGAG
>DN74477_c0_g1_i1	len=205 path=[0:0-204]
GAAGTTTTTTTTATACCAATTATGTTAAAGTTTGAAATTGTAAAAAGGGGCTTAAATGAAGTTATACAAACTGATAGATTGAATGCTCATTGATATTTTCAAATTTTAATACAATTTATTCCTATAGTGTTGATATTGAGGTATCTGAAATTTCAATATAATTTATTATTGTATTATTAAGGTATTTACATAAATTATAGATTTT
>DN74445_c0_g1_i1	len=460 path=[0:0-459]
AGATGATTTCCTTGATTCCTTTCCCCTATTGATTAAGTGAACGAATTTTTCATTAAACAAAGACGTTGAGTGCATTAGCATGGCTTGAATAGATATATACACTACGGGCTCTACTACAGAGCCACCCTATAAGTCGGGATTTTTACAAATAATTATAAAAAGAAACGCAGTGCTGTATGCGGTCATTTAAACTCTCTTGTTGCTCCTTTAAGTAGCAAAGTTTCTGTCACTTCTTACAAGCTAGTCAACAATCAATATGCGAGAGGTTATTACAAAATGGTGAATGGGAAAATATTCACATTGTCATTAATCTGCTTTTCATGGATAAGGTTAAAGGGGAAATGATGGGAGTGGAGGTTATACCCCATTTCTACAAGACTGAGAATTATAAATTCAACA…
>DN74459_c0_g1_i1	len=206 path=[0:0-205]
AAATGAGGTGATGTGAGGACATTTTACTCATCCAACAAGAGCACAACACAACACAAACATAAGGGTTCGTGGAGAGGCAAAACACATTTGTTGGAGGCCGCAGCAAGAAGAGAACAGACCAACGAGGGTACAATGTTGTTTCAGGGCTGTTGGAGGGTGACTGAGCTCATGGAAAGAGGGCCGAGGTCATTGGAGACTGTTTTGTG
>DN74466_c0_g1_i1	len=295 path=[0:0-294]
CCCAACCATACATATTGTTCACCACATCGCTAATTTGTTTCCCCTAAAATATGTTTTATGATACCATATCAGTCGATGTCAGAGTCATTTAACAAAAGCACCACTGGTGATTCATGCTTATCTAAAGCCTAATGATATTCAATATTTATAATGTTACTTGTGTGGAAATTTATGTACTCTCCAGCAAGGGGGTGTCTTTTCACCCTAAAATATGCAAACAGGCCAGCCATGGGGTGTCTTTTCACCCTAAAATATGCAAACAGGCCAGCCATGGGGTGTCTTTTCACCCTAAAAT
>DN74462_c0_g1_i1	len=278 path=[0:0-277]
TGTTCGCTTCAACGCCCTTGTAGAAGATGCCAAATATGTGACATGTGCCAACTACTAAATCAAGAAGCATGCCACACTAACACTGATGCAAAGGTTGATGAAAGACCTTAATCAAATTTGACTTTTGAGGGAGTTCAATTATGATGGATGGTTGGATAGATATTAGACAACGACCATTTTTGAACATTATTGATGGCTTTGCAGGTCTTGCTTTTTAAGTAAATTAATTGCATTGGAAAGAGAAAGGCCTCGCCTTTCCATTTGGGGTATTAAAGGAG
>DN74444_c0_g1_i1	len=217 path=[0:0-216]
GTTAAATTTAAAAATAAAATGACGCTGGTAAGACCTAACTTCTGTGACCCTGTTTGTGGGGAGAGAGAGCTGTAAGCCCTACAGGCTACAAGGACCTTGAATCTTGTGGCACAGTGCACTCAAGAGTTTATAGCTAAGATACAGAACCTGTCGTAATATAACACAAACAAGGGCACAATCTATCCTTTATCACAGATAAAGAGCTGCAAACAAAGTG
>DN74467_c0_g1_i1	len=326 path=[0:0-325]
GGAAGGTCAATGATGTTGTGTCCTCCGAATCTGGTGTTCCTGTGTTCGCCCAAACAGCCCAACCATTTGTTTTTCGTCCTCCTAACTCTGCTAAGACAAAGATATCAGAATCAGGAGCAACCAAGAGATTGGCTGAAGAGTCAGAGTCCATTTCCGAAGACGTCTGGCAGTTTAACTGGAATCGAGTAGATCACATCCTTAGAGATGAACTGGTATTGAAATGCGTAAAGGAATCAGAAGAATATGATTCGAAGGATGCGCTAATATGGAATTGTCTTTTACAAGTGGCCGATCAAGGGACCAATCTTGATACGATTCAATCTGAT
>DN74490_c0_g1_i1	len=535 path=[0:0-534]
ACAAAGAAATTTAGCCATATTGTTGAGGTTGTTTTTCTCTCACTCTGTTTTCCATTCAATATTTGTTCCTAGTCTACCTACAAAAAATTATACTTTTCTAATACTATCGGTAGACCTAAAACTTGGGTAAGGGGAAGCAAATTTCATCTCAGACAGGTAGCTAAAGCGCTTACCTGAACATTTTACTGGCTGGTGGAATTAATTTTTTACAGTGTTTGGGCCAAGGATTGGTACCTTTTAATGATGAACTAAGTTCAATTTATAAGGTTTTGCAAAGGGCTGGCAGAGGAAATGCCCTCAGCCTAACTGTGGCCATGCCTTTGGTTGGCTTGAAGGTTGGCCTTTTTCTTTTAGGCTTGAAACAACTTTTTGTACTCCATCTATTTCAAAGACTTAGAA…
>DN74469_c0_g1_i1	len=414 path=[0:0-413]
GTGTGAGGTCAGTTGGTGTGGGTGTTAGCGAATTCTTCCTTTGTTGTAGCTCTTTCTCTAGCTTGCTGATTCTGGATCAGTTATATGTTTATCTGTTCGTTTCTTTAAGATGCCTGTCTGGTGGAAACTAAGTATTGGATGGATCAAGGTGTTTGCCTGAATGTTTCTAATATAGAGTAGAGGGTCATGGATGAAGTCTGTATATCTGAAATTGCAGGGGTTTAACAGCAAAACACGCAAGAAGACAATAGAGCTGATATGCTCTATTAAAGTGAAAGTCCCAACTAAAATGGTTGTTAACAAGGGAAACCAATAACTGTGCAATGGAGGAAAATATAGTTTTTAACAAGAGTAGAAATTCATTTTCAAAAGTTAGAGCTTATCAAGATCAAGGGGTTC…
>DN74458_c0_g1_i1	len=205 path=[0:0-204]
GGGCCTAGGGCACAAACTCGATGGGAAACAATCAATGTTCCCATGCGTAATAATTATCTCTGTTTAAAGGGGCTGAAATCTATAGCCATCAACGAAGTTTGCAAGTTTGGCATAAAACCTAGGTCTACGCGTGTTAGGATCAACACAAGAAGTGTCGTTGGAAATCCTTACACTATGCTGACCTCTGTTGTGTAGAGATCCTTGG
>DN74486_c0_g1_i1	len=237 path=[0:0-236]
GTAATGTGCATATAGTACTGTCATTGCTTATACAAAGGACTGCATTCTTTCATAATAGTTATAGATGAATCCAGTGAATGCTTTAGTTAAAAACTTGAACTTACATATTAGTCAATGTAAAACACCGAGTAATATTATTGCTGAATATTATACCTTCAAACCAGGTTAGTAGTGTGGCTGCTCAATGCTGAAACCTTTCTTTGTACGAGTGATGTAATTCTGGAAAAAATATAGGAG
>DN74427_c0_g1_i1	len=319 path=[0:0-318]
TATTTTCATGAGTTCTTTCCTCCAATATTGCTTGGTTTCAATTTTTTCTCCAATTAGTTTAGTTAGCATGAATCTTACAATATGCATATAACATCTATTAACGTTGGAGTGTATCTCATCAACAACTATTTCTTAAGAGCTATAGAGTGCGATTATCAATGCAAAGAAATCAGTTTTTATTTCCAGAACGATCTGAATATACTTATCCAATTTCCCAAGATATTGAACATAAACTGACATATGTGTACTTTAATGCAGGTTGTACAAAACCAGGGGAGAGAGATTCAAAGAAGTTTGGGGGTGCATTATGCCATGGAGG
>DN74409_c0_g1_i1	len=299 path=[0:0-298]
AAAAAAAATATCCATTAAAATTACAAGCTATTTGTAAATGCTTGCTAATTTTCATTGTGAAATCAAGCTTTTCGGGTTTTCCTCTGTCGGATTGTGAGTGGGCCATATTTTCCTCTGTTCAATGGTTAAAGTCAAGATGCCCATTCTATTTTAGAAAAGCCCTGAAAAGCAATCCTTGTTTGGTGACATGTGATGTCAAAAGGTAATCTTAAAAGAGTTCTGATGTTACAGGGAGGTGAAGCATATGGGGTTCATTTGAAGGTTAATGCAGAGGCCTAGTATTTTTAAGTGTTCTGCCA
>DN77444_c0_g1_i1	len=332 path=[0:0-331]
TGTTATACACAAAGGCATGCCATCCATTTTGACAATCATAATGTGCCATGGTTGCATCTTCAAACTTTTAGTTAACCAAGAAACACTCTTGAGATAAAACGGCACATGTAGTGGATACTCAAAGCAAAGAAGGGGGTTGAGCATGGGGTATGGTGTATGATGTCCTCCACATGTGATTTTAATCATAAATGTGAGAGACTCCAAACATTGATGGATGAAGGACACAAATTGATGGATGGACACATGGACACATTGATGTATAATTTCATGGAGATTATTTCCATTATGATGGTTTCATTTGTATCCATGTGCCTAGGTGATTTGAATGGAGG
>DN77482_c0_g1_i1	len=562 path=[0:0-561]
TGTTATGCTATGCTATCCATCCATAAATGTTTGGAGTAGTATATGCCCATTGCCAAATAATGTACTTTTTCGATTTAACAATAGGCAATATACTATCATTGGATAGGCAATACACTACCATGCGAATAACCTTATTTGCTATGCTATCGATCCATAAATATGCACACTATGCACATTGCAAGATAATGTACTTGTTTCGATCACATGGTAGGCTATTGGATAAAGCTGTGATCTCTAGATTATGTGATTGACGAAAGTCATCCCACAACGTGATATTATTCCCATTTATGTGGCCTCCATCCAACAGGGCAGTGTACAACACTAGGCTATGCTTAGGATCCATAAATGAGCAGAGCAGTGTATGCACACTGCAGGATAATGTACTTGTTTGGATCTCAT…
>DN77470_c0_g1_i1	len=294 path=[0:0-293]
AGAATTGAGATTATGTTTCTTTACTTTTAATGAGGTATGCTGGAAGCATAGTGTGTTCTTGTTAGCCTATCAGGTGAGGCTTAGATCCTTAAATTTCTGAAGCCTCTTTCCTAATTCCCGACCTGCAATCCCCTCAGAAATTGAGGTGGAAGGTTTTTTCTTGTTTGTTTAAATCAATTCATCAGGTGACCAAAGAGCCATCATTAGGACTGAGAGAAACACCAGGATGTAACACACAGGCAATGAGGGAGTGCTTGATACATGTCTTGAGAATATTTAGCTGTGCTAGCAGCT
>DN77431_c0_g1_i1	len=237 path=[0:0-236]
TGGCAGAGGTGTGACCTATAAACCCTAATTTTTTACCCTTTCTTGACTCCATTATTACCCTTTTTTGTGGACTCATATTACCCCTAATTTCCATTTAACCTTGTCTGCTACATTTTACATTCAAGAAGCTTTATTTGTCTCTGTTGATGAGTGTCCACTAGAAACTTGAGAGGTTTCACACATTAGCCACAACTTTTCCAGAAACAACCAGCATAAATAAGTCTAATAAATGTTTCA
>DN77423_c0_g1_i1	len=246 path=[0:0-245]
TTAAATGAAACGATTTATTTCAATATTTATGTGCGCAAAGGTCACAAACTATTCCTAGATCCTGTTTGGGTGGGTTTGATATTTAGTAAAGAACTTCTTTGGGGCTGAAGTTTAAATTGCTGTGGATGAAAAGAGTTGAAGTGCTTGCCCAGTCAGTTACTAACTTACTACTAAATTAATATTGTTGCATAGACATTTGATCATATTAAACCTATTATAGGAAATTTGAAGTCTGTAAGAGACCTG
>DN77460_c0_g1_i1	len=206 path=[0:0-205]
GTTGGGAGTCTGCCATGACCATAGGTACGCAGTTACTGCAAATGCTTTCACCAACCTCTACGAATGGAATAAAATTTTGTAGGTTCTTCTGTTATCATCGGAAGGCGGTGTAAGGCGGGGACTTTTTAAAGAAATTCAAAAAGGCTGTCCACGCCATTTGCCTGGGGCATTTTTTCCGTATTCTCCTCTCGTAAAAGGATGTGTGA
>DN77409_c0_g1_i1	len=245 path=[0:0-244]
GCGCAAGTTTCTAATTTGATGCTTTTATTTATCATAACTTGTAGACATATGCAAGTGCATGGGATCGGATGGCCATCATATCCCCCTCTTTAATGCTTTGGGTGATGGTGGGGGTGGAAAGCCCTCTCCCCTCTTTCCTTTGACATGTGTTCCAATAGCCCCATCCGAGTTAAAAAAGAGTTATTAAATTACCATAGTTTTGTTCAATTAAAATTTAAGAAGGTTGGTATTAGAACATATATTTT
>DN77485_c0_g1_i1	len=260 path=[0:0-259]
TTCCAATTTGTGTGATCATGACAGTTAGTTCACATCGTCGCTTGTCAGAAAGATCGTGTTCCTCGCAGGCCTAAACCGAATCATATTACTTGCTTGGGCAATTTTGAACCTGGAAAGTCACAAAGACATTATCGTAGGTCTGAAACAGTTGTTGGAAAGTTGTTCTCAATGTATTTCTTCACAAAAACAGTAGCAGTTGCAAGGTAGTAGCGGAATCTTGGATGTTGGACAAATCGGTTATCATGGTAGTGCAAAAAGTG
>DN77498_c0_g1_i1	len=228 path=[0:0-227]
GAATGAAGAAAATTGAAAAAAGGAAGCCAATCCCCCCAGCTGATTAAGGCCCCACTTCCTCCAATGGGATACAATTCCCTAAAGTGCAAGTGGGCATAAAGCATTCCGTATAAAGCAATCACTTTCCAATGAGTTGAAAAACCATCAGCTGACGAAAAAAAAAATTAGTAGAGGTGAAGATCATGGTCACATGGTCAAATTCTCTTTATTTTCAATATTGGAAGATAA
>DN77428_c0_g1_i1	len=344 path=[0:0-343]
GGAGAAACAATGTGTTTTTGGCCATTACTAATTGAAGAATCGGCTAAGGTGGGCAGTGGTTCCTGCAGTTGTTGTAATTCCACCCATGGATGAAACAAAAAGATTAGTTAGTGCAATGTTCATTTGTTTTCAAGAAGGAAAATAGAAAGACCATACCTTGACTGGTATTGCATGTCCGAGTTGCTCGAAGCGAAATACCATACTGTGATTAGTATTCCTATCCAAGTTGCTAGAAGCGAAAGACCATACCATGACTAGTATTTCCTGTCCAAGACGCTGGAAGAGGGACGAATGTATGATACCATGTGGGATGGGTTGTTTGTGAAGGATGCACTGGGCACAAA
>DN77478_c0_g1_i1	len=410 path=[0:0-409]
TGGGATTGCAAAAGCCGGCCTCCCTATTTCAATGCCCACTAATTCCTTTGCATTATCAACAAACTTTTTATGAACTAGGCCACTTTCATATGATGAACTTCCAAATCCCAACTGATGGTGTACTTGAATGATATTCCTTATAGAAGGAACTGATCAGTGCATGATTTTTGTATGATTCATGCTCCTAATGAAGTCCGAGAGGCTGTGGGAAGTGCGAAGGCAACCAAGAACCGACTCATATAGTCTCATGATGGCAACTCAAAGGGTCTCTATTATCTAAAATACCAATGTTGCGTAACCTCACAAATAGAAGCAACTCAAAGGGTCTTTTTTAAGGCAGTTTGCACTTCTTTTCTACTTCCCACCATGTAAAAGTGATGTCATTGAAGCAACTGATCT…
>DN77457_c0_g1_i1	len=490 path=[0:0-489]
GCATTTTCTATTCTACATTTTAGAGTACGGATGCTTACATGGGTATCTCTTCCGCCAAATCTCTCGAATACGGATGTTTACATGGGTGTCTCTTCCGCCAAATCTCTGGCAAATGTCAGACATGATCGGTCTTCCCTAGTCATTTTTTTATTAAATTTTGCCCATCAGCTGAATTTGGATGTAAACCAAACGATGAAATCACTACTCACTTGCACCGATCCATATAAACCCGGTCATTAAGGTTTACCCATCAGCTGAATTCGGATGTAAACTAAGCGGCGAAATTACATCTGACTAGTACCAACCCATGTAAACCCGGGTCACACCCTGAGGTTGCAAATCTGTGGTCGTGATCTTGAGGAATGGATCTTGTAGCAACACTTTGTGTAAACTTGTGAA…
>DN77418_c0_g1_i1	len=878 path=[0:0-877]
GGCATGTTTATTATTACAAGGTGGTCACAAGCTTATTTTTAGTAGGCCCTGGCAAAATAAATGAAGACAAGGATCAATATAGATCACGAGTAGAAAAGTAACTGACTGCAGCACCTAATGCACATCACCAACAAAAGATGATAATAAAACATAGCAAATGGAATTTTATAACGGTAATACAAGATGAAGGCACAAGCTTTGAAGTGAGTTCATTCTGGTCACAGGCTACAGCCCATAAACAGTTTTATACGGAAAGAAACAAGTTCCTTTAAAGCCAGAAATCATGTTACATACTGTGAAATAAAGTTGGCATTCTAGAAGAACACCCACCATTGCTTATTGTTCTTTGTTCTGATTTTCACAGCTATAACTTAAGACATCAAAGAGTGAAATACTTTT…
>DN77471_c0_g1_i1	len=446 path=[0:0-445]
GCCCGATCGAGGTGGTGGGAGCCTTGTATCTGGGGGCGGGTCTGTGTAATAAAAGATGGATTTTTGCATCCAGCCATCACCGGCTTTCCCTGAAATTCACCGTACAGTCAATCTATGAATGAAAAAAGAGACCGGGTAAAAGGTTATCCCGATTCCCGACTACCGAGTCACTGGAAGTTTGCCTGCTCTCGTACAGTTGTCCTCATTAAAGCTAGATCTCAGTAATCAATGGCGCAGGTCAGTCTGTCATGTGCCGCGTACCGTCCATAATTTGACCAAGTTTTCCGAGTTTGTGCCTCATCACAATCATATTCACAGACTTTTCCGAATACTAAAAGTCGTGTGATACGATACGTGAATTCATGCCTGCGACTCATGCCTTGTGATTATGTTTTCTTT…
>DN77499_c0_g1_i1	len=212 path=[0:0-211]
AGTTGCATGGTGGTTTTTATGGTGGCCATTTTTCTGCCAAGGCCCTCACAAGATCCTTCGTGAAAATTTTCTACTGGCCTACTTTGTTTGCAGATGTGCATTCATACATAGCAACACATGGGGAGTGTTAGTTCTTCATTGGAAACCAATGATTTCTAACTTTGCCTTTGGAGCTGTAGTAGTGGAGGATGTGTTTTAGTAGTGGGAAATGG
>DN77473_c0_g1_i1	len=272 path=[0:0-271]
AAGGGAACTTTACCACATACCTCAGTTTGCTCAATCGGTGGAGGAGGCTTATCTAAGTGTAAGAGCTTTCTAATTCGGATCTTTGAGCAATATATTATATATTTCATGTGGAAGAGATTTACAGATCCATTCCCCCTAGTACTTGTACCTTACAGAATACCCAAGTTTGGTCTTCTGGTTAAGTATCCATAGCCATGTGTAAGAGGCTTAGAATTCGAAAATTCTTCAACATATCCAAAAATATTGTTGTTTATATTTATAGTTATTAAAAG
>DN77449_c0_g1_i1	len=249 path=[0:0-248]
GGTTTAGCCACTTGTGTGTTTATAAAGTTACTACTTAAATATGTTTTAGTCTTTTTTTTCAAATACAGTGAATTTGGTTTTATGAGCTGTACTGTTTGTTCAATATATTGTTTTATTACACTGTCTTATATATTTTTGACTCGATGGGGGCGTCTTTCAGCTGGTCATTAAATTTTTACTTTCCTGGCAGAAGCTATTTACTTAAAGATCACTTCTTTAAGGAGAAGTGGTAATATCTCTTGATATGGC
>DN77469_c0_g1_i1	len=285 path=[0:0-284]
GTGGAGTTTACAACTTCTCCGACCTGCGAATCAAATCTCAACTGAACTCTCTGTTAGAACTAACTCATAGACAAGATATAGTTTTCCTGTTACCACATAGTACCTCTTCAGTCAGTATTGACTCATAGACAAGATATAGCTTTCCTGTTACCACATACTACGTCTTTCTCTACCTCTTTATAGTGTGGAGTTTATAACTTCTCAGATCATGAAATGTGATTAACATCTCAGTGTGTCTCACCGTTAAAACAAATTTGAGTTGCAGATTCCAAAATAAATTAATTA
>DN77436_c0_g1_i1	len=276 path=[0:0-275]
GAATAATCTTGACAGAGCAATGTATGCTTCAACCATAAATTGAACCCAGTAATACAGTAGTAAATTGTCCAACAATAATCATGCGCAGGTAATCGAAACAACTTTGTTAAAACAGTTATAAGCTACTGACCATAGATTTGGATTTGGTCATATGAATAACCTAACCAGAGATCGCAGCTACAAAAGTTCACTCAATTTCTGACTAGTTAAAACCTTCGGGCCTGTACTAGACCACGGCTTGATTACTGTACCAGATTCTGCCTTCTTTGTTTCAGG
>DN77410_c0_g1_i1	len=382 path=[0:0-381]
TCTTTTTATAATTTTGTTTTAGTCCAACATCTAGGAGCAGTTATGCACACATTTGAGAGGATCTGTTGCAGAAATGTTCTTCCCTTTAGGATGTTGGCAAAAAACGTTCTAAGAGCCTAATGGATCAGAATCAGCAGCCTCAGATTTAAAGGGACCTGGTAGGGCAAAAGCAATCTTTCTCATAATTAGTTCAAATTTGTTGCCTTTGACCCCCTTATCACTTGGTTGATCCCCTTGTCACTTGGTTGATCTGTAGGGCCCTTTCCTAAAATGGTGTGAAAGTGTAGGATAAGCTTCGCCTTTTTCATAGAAGTTAAAGTTTCACCTGTCCAACATTGATCAGGCCTCTTTTTCAAAATTCATTTTGACACCCTTTTCTGTG
>DN77415_c0_g1_i1	len=702 path=[0:0-701]
ATTTGATAGAAATAAGAAAAAAAATAAAGTGAATTGTTTCATCTAGCTCTTCTTCATCATATTTTAGAATATTCCTGATCCAACATTTGAAATAAAAATAGTCCATACAAAGCATGCCAAGAAGACTCAATTAGATTGTCACTTTGTTGCTAAGAGGAAACAATTTAATATCAAAAAGTACTAAACATTCACATGGCAAACCCCAACTTGTACCAAATGGTTGTCAAGATCATAGAACTGCCAATGCAGAGAAATAAGGCCCTATTAGCAAATCAACAAATCTGCTTTTGTTTTGGAGATCCGGCTAGGTTATATTTCCAGTGAATATTTGACTAGGTTATATTTATATTTTTAGTGAATATTTGGCTAGGTTATACTTCCATGAATAAGAGATTACTT…
>DN77432_c0_g1_i1	len=281 path=[0:0-280]
CAAGAAAGTGATAGAGAGTGGGAGGGTAAACAAGGAATATCTGCCCACTGCCTTGACTCGTGTCTACAATTAAAGCATGACTGTGCAGTAGTATATTTGTCTGAAAATTTTCGGGATTAGATAGAGCATTTGGAAAGTCAAAATCACTGAGAGTTCTTTACTTGTCTTTTGGATTTAAAATACAATTGAGTTGTACCATCAATGCTCGTTCATAAACAGTAAGAAGCGTTCAGACCATGGATATTTACAGCGATAAACATTGTATTATAAAACGACTACAG
>DN77424_c0_g1_i1	len=398 path=[0:0-397]
GACACTATACCTAATGACCCTACATCAGTTGTTGCCTCAGAGCAACTTATCAAGTCGAGTGCACAGTCTACTAGTCAATCTTCATCGTCACCTAAGTTAACCAAGGAAAACATTGAAAAGAGGTTAAGGAAGTGAAAGGGTGCAAGAACCTCATGACATCTAGCTTCATCTATAGAATGAGAGGAGGATAATTTTCTTGGCATCTAGTAGCTATGGGGGCGAAATCAATCAATGAGTGACCTATTATGTATCTTAGCCATGATGTTCCACATTTTCCCACAAGTTGTAATTTTATATCTAAGGTACGAAATTCCATCCTTCCATGTTTGGGATATATGTGCAGTAGGGATATCTATCAACAAAGGTGTTTTGATTGTTTGGTGGAGCAATGATTTGTA
>DN77425_c0_g1_i1	len=201 path=[0:0-200]
GTAAGATTGTTGTAAGCTATGCATAAGTGTTTCTATCCATAGGCATATAAAATGCATTTTCTGGAGGTCACAATTATTATTTTTACTTGATTCACAGGCAAGCATTTATACACAAGTTTTAGGCTTGATATCCAGGCACTCATGAAAAAAATAGAATCAGATGGCTACTTAACAGTAGAATAGAATCAGATGGCTATTTAA
>DN77427_c0_g1_i1	len=249 path=[0:0-248]
ATAAAATTTGAAAAATTTTAACTTCACATCTATCCAACATTTGATAAAGCTATACTACTCTGATACATCACCTCATTACTGTTAGTGTTACATTAGTGATCCCTTTACATCAATGTTCGAAAACACTTTCCACAGTGTTATGGTTTTTCATAATAGTAAGCTATTTAGCTCTAGAGGAAGTAGGGTAGTATGTAAGCATAATGAGAGTAGCGCAGCGATAGATGCTGGGACAGATACAATATATGTAAG
>DN77497_c0_g1_i1	len=359 path=[0:0-358]
TGGGAATAAACCTCAAAAAGCCAATAAGATTGTGAAGTTTTTAAATTTCAAAAGCTAGGAGCAATGACATGCTTTAGGAGTTCAAGACAGGACTTCACTGGTAATGCAGGCTAACAGAGTCTCGACCAAAAGAAATTTATTTCAACAAGCCTACAATAAATGCAGAACTGGGAATAAACCTCAAAAAGCCAATAAGATTGTGAAGTTTTTAAATTTCAAAAGCTAGGAGCAATGACATGCTTTAGGAGTTCAAGACAGGACTTCACTGGTAATGCAGGCTAACAGAGTCTCGACCAAAAGAAATTTATTTCAACAAGCCTACAATAAATGCAGAACTGGGAATAAACCTCAAAAAGCCA
>DN77448_c0_g1_i1	len=431 path=[0:0-430]
CAAATTTTGATGAAAAATAACTCCAAATTTAAGCAAAAGTCTCCCATACCTTTCATAAATGAAGAGAAGGGTCAGATCACGAAGGGAGAAAGTGGAGTTCATGTAACATGGTATGCTTTACTTTTGTTGATATATGTCAATGATGTGGTCTTGCTCTCAAAGGATAAATCAAATGCCTAAAGACGCCTTGATATAAGACCCAGTGAGTAGGAAATGAAGGCTTACAATGGCCATAGGTAATGGAGACCAGGACATTAATATAAATATTACATACAATATTCATTGCTTCAAATGAAGACTTACAATGGCCGTAGGTAATGGAGACAAGGCCATTAATATAAATATTACATACAATATTCATTGCTTCAAATGAAGACTTACAATGGCCGTAGGTAATGG…
>DN77452_c0_g1_i1	len=422 path=[0:0-421]
GAACCATTAAAAACTTGAGGTAAATCTGATGTTTTACATGCCAATTCTAAACAATAAGTCAAATGAATAAACAAACCCCTTACACCTGATGGGCATTAGGCACCATGTGACTACATTTTCTTAGTAATATAATTTCACTCTATGTGATGTAACAATACAATGTGAACTACATTACATGACTAACCCCCACCCTCAAAACTTTTCCCTTCATTAATATTCTCTATTAATATTTTGGGCAATTTAGGGCCATCTTTCCTTGATATCCTCTTCAAAAAGTTTCAATTTCTGGTGAAATGTCTCTCTACCCATTAATCTTATGCTTCAAAAATATCAACCTAATGCCATAATTTTCTCAATTCCTTGTGTTTTCCAACAACATTGTTTGAATCCACATCTACT…
>DN87838_c0_g1_i1	len=381 path=[0:0-380]
TTTTTATTCTGACAAAGTGCAAAACATATGGTGCTTAAATGCAGTTAGGTTTATTATAAATGTCATACTATCAGATCATTGCAAGTGGATAGCTACTCAAAGGATGTTGAATTGGTTTCTCGGGAAAATTTATGATAGAGCTTTCCACAAATATTGAAATGAGTTTTTATAGAATGCAGTTTTTATTCTGACAAAGTGCAAAACATATGGTGCTTAAATGCAGTTAGGTTTATTATAAATGTCATACTATCAGATCATTGCAAGTGGATAGCTACTCAAAGGATGTTGAATTGGTTTCTCGGGAAAATTTATGATAGAGCTTTCCACAAATATTGAAATGAGTTTTTATAGAATGCAGTTTTTATTCTGACAAAGTGCAAA
>DN87841_c0_g1_i1	len=227 path=[0:0-226]
AATCTGTCTATTTGCGTAGAGATATTACGCTGATCTCTACAAACCAACATGGATATGTTTAAACAGCGTGGGTATGTTTTCTTTTTTGCCAATCACGTGAATGTAAAATGGTAATGGCATATGTAATTACTTTAAAGCCATTAAACAAAAGGAGTTATAAGGGTTATGTAAAATGGTAATGGCATACGTAATTATTTTAAAGCCATTAAACAAAAAGGAGTTATAAG
>DN87822_c0_g1_i1	len=336 path=[0:0-335]
ATCTCTGATTTAAATTAGTGGTTTGTTGATCTTGCTCCTCGTCCTTGTCTTGATGATGAACCTAGATAGAGGTTCAAAACACGTCGACCCTGAGTTTTCTATGTGATTTCTCTGGAAGATCTAGGTATTCAGTTTGTTTTTCGTAGTACCCTTAGCTTCATAATTGGAAGAAATTAGGGCTTAGCTTCAAGGAGTTTGCTAATAACCAAAATTTTATAACATAAAATTTTGTTAAATTAGCTTTCTTATGAAAATGAAATCCTGTGAAACATTAAATTAGGTCTACATTGGCACTCTCCTTTTCCTTGTTTATAGCAACAGGTCATCCTTTTGCAG
>DN87874_c0_g1_i1	len=476 path=[0:0-475]
TTGGAGGTTGGAATGATGTGAAGAAGTAAAAGGACGAAGGCTCTGCACTGCTAAATGCATGCTACTTGGATCTATTTCTAATACTCTTAAATCTGATGTTGAAAGGGGTAACTTAGTCATCAACCATGATGAGGTATGGTGCACATTACGTGGTTGACTCATTTTTTTTTCATGATCTTTTGTAGCATGACTTTATTACCCATTCAAGAGCACCCGCTTGTTCGACATTTTCCTTAACAAGGCAACTTCTCATTCCTAAGAAACTACGACAATGTCAATTTTCTGTAATTCATTTTCTGTCTGTCAGTTTATCTGATCACTGTCACATAGCTATATCATTCATTCCTATCCCCATTACATCTGTATATAACTTAGTTTTCCTTTTTCTTCCCTAATTGT…
>DN87870_c0_g1_i1	len=279 path=[0:0-278]
AGTTCATACACTGCTATTAATCCACTAACCATACAATCTGTCGTATTCACCCATGATATCCTATCTCACCTACCAAGTTTCAATCCGCCATTTAATTTTACCATCCCAATCTTGTGAGAGCATAAAATTTGAAATTAAAACACTTCCCAATCTGACTTGGCATTACCATTTGACTGCTCAGACAGTCACCACTTATCATCTGGATCTTTTCATTTTTTATGGGAATAATGTTTAGGTTAAAAGGATAAGAAGAATTTGGATTGGGAAAATTAATTAGCA
>DN87880_c0_g1_i1	len=278 path=[0:0-277]
TGTGCTTAGTCTGTGTTCCTCTGTTTCTTACTTTTAGTCAAAATAAAAACATATGGCATGTGGGATGCCCAGATTTCCCTTATGGGAGGTTTTTGCTGCTACCAAATGGGGACATTTTTGGGCTGTCTCCAAGTACTAAGGTTGCTCTGTAATGCAGGGGATGTGGTGCCCAACTCGCAGAGACAAGTTCCTGTTAACATAGGGGATAATGTTAATGATTATTTTTTGGGGGTTTTTATCAGCCTGCTCAATATCATAAAGGGTTTTCAATATAATAA
>DN87836_c0_g1_i1	len=237 path=[0:0-236]
GATTTGAATAGTGACAGGTGTTGTCCCGAAAATCCTTCCCTGGGTTTGTCCTCTCTCTGCCCATATAACCTTCGTTCGATGACCTCCAAGCGCGACCTCTATCCTTCTGTGGGGGGTATTGATCCCTCCCCTTCGCAGCCACAGCCTGGGAAGAAAAGGGGTAGGAAATCTAAACTATCGGTGGCAAAAACACAGGGTATTTACGATGTGGCTGATGGGAAACAACGTTCCATCACA
>DN87860_c0_g1_i1	len=272 path=[0:0-271]
GTTGCAGCAGGCATTTGTAGTGCCATTCTTGGGCAAGAATTTGTTTAATCCTTGGATGCTTAATATTCCTAGACTGAAGCCACCTTTCTCAGGAAGACTGGAGTAATTGTTTAGGATATTTGGGTAATTTTGCTTTGAAAGTTTGTGCATTGTATTAATAATTGCAAACTGTCTATCATCAGCTTGAAGATTATGAACCTTCAAGGTTTATAAACTAACCACGTGCGTTATAGTTTCAGACACCTGTATACTATATACACGAACATATCTTT
>DN87879_c0_g1_i1	len=244 path=[0:0-243]
TGAATATGTATGTCAAGCAAGGATCCATTAGGTTCGCATTACCTAACAAGCCATTACACCATTAGACACCACATCACCTATCTCTGGACATTTTAAGTCAACACGGGCATTGAAAAGATGGTAAAGTTTGAAAATTGTATTGATTTCCAATTTGCACATGTGATGATTAAATCCAACATTCCAACATTCAAAGAGAAAAGGTTTTATTACCCCATGATGTATATTGTAAAACCCTTCAGCGAGG
>DN87831_c0_g1_i1	len=230 path=[0:0-229]
TAATGATTTTGATAGGGATTGCCCATCTTTTTTGTAAGTATGAAAACTGCAACCTAGAAAATAGTTCTTTGATTAAATGAAATTCTGGATGCAAAACTCTGCATTTTCTTGTCTAAGGAAAGGAGCTGCTGTGTGTAGATTTCTTTAGTTATAAAACACCAACTATTCTTTTGTTTGTGGGAATCTGTATCAATATCATTTTTCCTCATCAATGGGGAGATGGATATGTG
>DN87853_c0_g1_i1	len=349 path=[0:0-348]
TTCCGTATTAGTTTATGTACAAGTTCCACTAGCGAGCGTTTATTTGAATTCTATTTGTGCGGAGTCAATATTATTTGAGTGTGGAAGCCAATGTGCAGAATCTTGCGTTCCAAGTTAATAGCTTTTTGGAGGCTTTTAATTGTTAATGTGTCCGAAATTAATTTGTGTGAGAGAATTGAAATGTGTGGAAAGCCAATGTGCAGAGCATTGCTCTTCAATAGTGTGTAGCTTTGCCTTTGGCCAATGTGCAGAGTATTGCTCTTCAATAGTGTGTGAAGCTTTGCCTTTGGCCAATGTGCAGAGTATTGCTCTTCAATAGTGTGTGAAGCTTTGCCTTTGGCCAATGTGC
>DN87862_c0_g1_i1	len=240 path=[0:0-239]
GAGGACATCAGTAAAATTTTTGCAGCATTGGTAAGAACATCTGCATGTGTTTTTAGAAAGAAATGAATCGCAAATGAAACTACTGGGATTGGACCAAGATCAGGCACTTTGAAGATTCTGGGAGATATTTCAGATTTGGAAAAGTTCAAATCAGATTTTGAACAGAGTGCAGAATTATATCCGCTTATAGAGGAGCACTTACTCTGCTATTAGTGATGCTTCCATTGGTTTAATTGGCGG
>DN87897_c0_g1_i1	len=306 path=[0:0-305]
GCTGTCAAAATTTGTTGTTCTATGTTTTGGTGAGTTTTCTTGCAGGTTTTAGTGTGAGATCCATTTGTGAGTACAGAGATGTCTACATGATATTATATTAAAGCATCTTGCAAACGGCCCAGAGAGAGTCCATATGCATTGCGGAAGCAGAGGAAGGAGAAATGGAGGATGCACGTGGATTATTGGGAGAGTTCAATTAGAAATTAAAACATTAAAGGCCAGACTGGCATGATGAATCTGAAGAGGAACCTGAGAAGCCATGAGACGAAGCTGGTGTTGTAGAACCCATGGAAAAATTAATTGAGC
>DN87868_c0_g1_i1	len=203 path=[0:0-202]
AGGCATATCTTGCTTGCCTTGGGTATGAAGTGTCTGGTGTGGCTGGGGAACTAGCTATTGGGATGTGATTCCTAGGGAATAAGCTAATATGTTGTAAGCTAATCAGAATATTGAAATGAAATACCTTCTTTATATTTGGAATGCCTTATCCTTCACCATATTTGAAATGCCTTACCCGCCCTATCCATGAAATTCAATATGTG
>DN87888_c0_g1_i1	len=283 path=[0:0-282]
GTTTGTTGAACCGTAAAGTTGTTTATAATATATATCATATGTGTCTCCCTTTCTAGGAAATGGGAAACCAGAAACAACGGGAAACAAATTATCAGATAGGGAAACGGAAAAGTTCTTTTAAGGATAGGAAACCTAGGAGAGATTTCTTAGTGAGCACCGGAATGGGGTACAGGAAATAGTTGCGGAAATGTGAAGAAGAGTTCACAAAAAATATATCATATTCATATTTGTAATCTCATTAAAATATACAGCAACAAAACACATTTTATAACTTAAATCCGAT
>DN87855_c0_g1_i1	len=290 path=[0:0-289]
TGGACAGCTCATCATGTTTTTCCTCCTGCTCAAACTACAGTCTAGAGAAAGTAGTGATCATTTTGATGCAGTTACAGGTAAGCTCTGTTTTGTACTGTCCAGCACTATTTAGTTATCAATTTCCCTGGAGCAGAGAGCTTTTTGACGATTTAAAGTCGAATCCAGGGAAATGAGCGTTTAATCTTCCAGTTGTCAGTGGGTCGGAAGCTAATGGGTTCTAGTCCAGCACCTCCCCCAATGGGAGATGAGCAGACTTGGCGGTATGGCAACAATGTAACCGCAGATTCCGA
>DN87846_c0_g1_i1	len=491 path=[0:0-490]
GCATCATGTTTGGGCGAAAAGCCATTAAATCTGCATATAATGACTTCTGCCTAAAGGACACAAAACAATGAAGAGATCTCTAAATTTTTTATCTCCATGGATGAAGCTTGCCCCATTTTGTTTATATAAGGTCCCAGAATATTTTGGTTCAGATCTACAAGTTCAATAGCCTTCCTTTTCTGGAATGTTTTGATTCAGATATACAAATTCAATAGCCTTTCCTTAAACTGCAGCCTTAAAAAATATTGGATTTCCATTTATAGTCCTAACACCGAGAGCACCCACATAACCTTGAATTCAAAATGATATTTGAATTTTTTGAGATGTTGCAGTCTTTAATCCGGATAGAATCTCGTAAGCCCTTCCAATTAAATTGTAAACATTGATATGATGTGGGTA…
>DN87812_c0_g1_i1	len=373 path=[0:0-372]
GAAATCCCTGCAATTCTCATCTACCTTTATAAAATTGGTTGAGTAGGAATTTAATTAGATAATCCTAATCAAGAAATTAGGTTGTTTTTGGCATTTCCCTCTGCTGTTAAATTGAGAACCGAGTCAACGGGTCCTTTGTTTGATGGTTAAGCAGAGATAAAAATATTATCCACACCAAGGTTAAAATCCTCTAGAAACATGTTTCTCCTCTTGTGAGTCATCTCACCTGTGCAAGTGAGTTGTTCCAAGCAGTCAGACCTAGGTGCATTTGGGGAAATAGATACCCCCCAACTGTGGCTTCTTAGACGAAAGATCTTCATTGAATGCTGTCAACTGACTGCACTTTATTGTAATACTTCCAGATTGGATAAGG
>DN87801_c0_g1_i1	len=224 path=[0:0-223]
AACACGTCAAGGTATGGAATTTTTACATAAAGAGTGAAAAAAGCACATATTCAAAGTGGGCATCATCCATTTGCAATGTAGAAGTTAGCACAAACAAAAGAAGAGTGCCAAAATGATGAAGAAAAAGGAAATTAGATGAGGTTATGTACTTGAGCTTTTTGGGGGTAAAGTTGTAACCATGTGCTTGATTTTGAATGTTTCAAAATTAAGCACACAGTTTATCA
>DN87803_c0_g1_i1	len=253 path=[0:0-252]
AAACAATTTAAAAAAATCCAAAAATAAAAAATCAAAATAAAATAATAATAATAAATTTCTCGCCACCCCTAGGTAGGGTTGGCCGCAGGCGCGGGCGAGAAGGTAGTTTGCATGTTATCACCTCCCTGCTCGCACCAACCCTGCCCAGGGGCGGGTAGGCCGATTCTTTGAATCAGCGTGTTAGCCCTTGGGTAGGCTTGGCCGCGGGCAGGGAGGCGGCTGGCCGAGCTTGGCTGCGGGCACAGGTAGGGAG
>DN87878_c0_g1_i1	len=214 path=[0:0-213]
TAGGCTTTGTCAAAATATATTTTAAGCAAGAAAGCGCATTGTGTAGTTTCCATCACCCACTCAATATTTTGCCACACAGTTAGAAGGTTACCCTAGCTGAACAAACCCTTTATAAACCCTAGCTGTTTTGGATGGATTCTTCTCAGTATTGCGCCTTTAATGAGATTGAATATGAGTTCTAAAACCTTCTAGGAGACATTGAATAGAGTAATGA
>DN87865_c0_g1_i1	len=256 path=[0:0-255]
TACTGAAGGCAGTAAGATGCATCGTGCTAAAGGCCATTTAATCTGGCTGTCTTGGTTGTTCCCTTCGGATCGGCTATGTTCAAGGGAAAGAAACTTGTAAGATATTTTATGGGAGGTGTGCTGTTGGATGAAAGGGATAGTTTTCCTTTACAATATGGCACTTCAGTACTAGGAGCAACTAGACACTTGAGTAATACATGCCAATCTTCTCCAAAATCCTCCAATGTCGTTGCTGTCTCCTGGTTTAATGTCAAAG
>DN87814_c0_g1_i1	len=263 path=[0:0-262]
GAAGGTCCTCGGTGGCCAAGACATAGACAACCACAATAGCCCCCCCCCCGCACTTTGGGGGAAGCAGGTGAAAGGTCCTAAGTCCGAAAATCAAGGGAACCCATTCATAATCAATGAGCCACGTGATTCACCTAACTTCAAAAGAGGTGTCTTCTGTAACTTGTGAGGGGTCCATTCCTATCCCGTGAACTCTTATGACGACACAAAGGCTCAAGCTCTAGTTCTTGGAGGCAAAGCGTGTCCTCAACATTGTCATGAAGGGG
>DN87839_c0_g1_i1	len=280 path=[0:0-279]
TTGGAAATTATATTATTAGTTATCTGTGTCTTCTGACTTTTATGTGCTTACTGCAATGGATTACGGCTTTCTGTTCTTAAAATTGTTTTTTTCACATCCATTGATAGCTTGAGTAATACCAAAAACTATGCACACTTACACACTTCTTATGAAGGTCGTTAAATCTTATGTCTGAGATCCCTGCATGAATAGATGAATAATTACTCATCCTACCAAGCTTTTTCTGTAAGTCGCTGCTTCTTTAGAATTGATGATTTTTAATTATAAAATTAAAGAATGG
>DN87899_c0_g1_i1	len=365 path=[0:0-364]
GATTTTGCTGAATTTTCAGCCAAGTGGCATCGTTTTGCTGGTGCCTTAGGTTCTGGTTGGTTATTGGCTTCCTCTCTCTGGTCATTGACGTAGAGAATTTGCTCATTAACTGATATCCTTCAGAGGACTGTTCTTTAAACTCCATTTGTTCAAATTTTTTTGGTAATTTTTCCTAGTCTTGATAACCTTCTGCTGTTAACTTTACAGCTTACACTTCATCCTCTGCTGTTAACTTCAGAGCTTGCACTTCATCCTCCGTGTGGTTGCAGCGGTCATTTAGCTTTGCCAAGTCACCCTTAATCAAAGTCATATCTGTAGCAATTCGAGTGAAGTGCTCTCTGCATATATGGAATGGAATGTTCTAA
>DN87873_c0_g1_i1	len=289 path=[0:0-288]
TTCTCCCATCTGGCGTGGTGCCTTGACTTGGTCAAAGCTTTTTCACTGACCTGAATTTGCATCTGTTATTGGATATTCAATAGAACTTCGATGTCCTTGTAAGGTTAATTTTCATATCCTCAACTTTAACTAAAGCATATGTTTGCCAAAACAATCCACGGCATGGAAAAACTTCTTGTTTATAGAGGCAGGCTGTATCATATATGTTCTGGATGCCTCTAGAATCTTTAAGTTCTCTCCAACCACACAACCCTCCCTTTCTCCCCAAGAGTAATTGGCTCGTCTTCCG
>DN58075_c1_g1_i2	len=371 path=[1:0-249 2:250-273 4:274-370]
TCATTTGTATCTCTACAGATCTTAGTATTTAACAGCATATTAAAATAAAATTCACTGACAATTTGTACCTCTAAAACCCATATAAGTTATTACGGAAACCAGAACTCATCTAGGTCAGGAAGAATGAAATACTGCTTATGCATAATTGAAGAGCACCATATGAATCCACTTAACTAAATCAGTTGTTGGACAGTCCTTTAATAATAATTAAGATGGCCCTACCAAGTATACCATGTGCTCTCCCAATTAAACTCTCTCTCTTTCAATTGTATTAGCTCTAACGGTATAAACACACGTCCACTCTCTCTCTTTCTATTTTATTAACTCTAAGGGTATAAACACACATCCACTCTCTCTCTTTCAATTGTATT
>DN58075_c2_g1_i1	len=351 path=[0:0-350]
CATATTGAAGGATACATCTAGCAGGTTTGTTCTGTACCATTGTTCAAGGCTTATTATTTTTTCAGAGGGCTTGATATTCCACACAATGTGGGCCATTTGCCATCTAGATTTCTTCGTTGCACTGAAAGAAACGATGTGCTTTTGCAGCCCAGTTGGATGAGATGTGTAACATGTGTATGCCTGTCACACTAATAAAATCTAATGGAAAAAATATGTTGTCTCAGATCAAATATTAAAAGGAAAAAAGAAAACAAAGAAAAAATGGATGAATATTAATAATAATAATAACAATAAAATATACTAGCATAGATCCATCTTAACCCTGTATCTTTATTGCGCAGAAAAGCAAGG
>DN58040_c3_g1_i1	len=203 path=[0:0-202]
AGCCAATACTACGATTCCATGCGAATAACGTAAGCCTCCGATGTTACAAGGACAATTCATAACCTGCATTTACATTTATTGTTTGATTTCATTACCATTTGGTAAGTTATGAGTATAGTTCACTGAAATAGTGAAACTGCAAAAAATTCAAAGAAGCACACTTTAACTTTCCTCTTATTACCACTGGAGTGGCAGTTTCCAAT
>DN58091_c0_g2_i3	len=767 path=[0:0-181 2:182-323 4:324-561 5:562-766]
TTAGGAAAAGACTCATTCTCAAATAATGAAGGAAATGGAAGAAGAAATGCAGAGTCACATTGAACCACTCAAAGCCAATGCTTCCCAATATGAATATGGAGGTTGAGTGTTCTGTCTCTTCATATTCCTAACGCTTGTACAATAATGTTCTATTGGATATTAACAGAAAGGACGTAAAATACTTCACCTTCTCTTGGGCTGTATTGTTTATACCCCATTTTCTAATAGTAGAAGGGTTAAGTTGGATTCATTCAGGTAGTTGGAAAAGGGATAGTTAGCGGTGATGTAAAGCTTCATGTTGTTCACATAATGTTGTACAGTCTTTTTCTTTAAATGAGAATTATTGGTTAAGCCACTGCCCGATTTATCGTGTTGTTCCTTGAAATCATTATGTTTGTC…
>DN58061_c1_g2_i1	len=492 path=[0:0-96 1:97-246 3:247-491]
AGGACCACGCAACCGTACCCAACTCTCAGCTCTGGTCTTGATTGTAACTCCATGTTTATTAGGCATCTGCATTATCACAGTGTCTTGGAAGATGTGCGTGGGCTGATTACAAAGAATTCATTGCGATTATCATTATCGATCCATGTGCCTTTTTGCTCATATCAATCTCAGTGATTGAGGGGAGTCTTCAAAAACTTTCCAAATCACTCTCCTAGAAGGATCCGACAAATCTGCTTAAAAGAGAGGGTGAATAGTAAGAGTCCGTTAGTATGTCTCTGCACGTCCTGAAGAATGGGCGGACTCATGAACTGCATATAGGCCGGAAAAGAAACTTTCAAAAGAGATTGATCCCAATTTTTGCCTTATGTCAGTCCTTTTTTGCTTTGACCCAAGTCTACC…
>DN58061_c1_g2_i2	len=493 path=[0:0-96 2:97-247 3:248-492]
AGGACCACGCAACCGTACCCAACTCTCAGCTCTGGTCTTGATTGTAACTCCATGTTTATTAGGCATCTGCATTATCACAGTGTCTTGGAAGATGTGCCTTGGCTGATTACAAAGAATCCATTTGCGATTATCATTGTCAATCCATGTGCCTTTTTGCTCATAGCAATCTCACTGATCAAGGGGAGTCTTCGAAGACTTTCCAAATCACTCTCCCAGAAGGATCGGACAAATCTGCTTAAAAGAGAGGTTGAATAGTAAGAGTCCGTTAGTATGTCTCTGCACGTCCTGAAGAATGGGCGGACTCATGAACTGCATATAGGCCGGAAAAGAAACTTTCAAAAGAGATTGATCCCAATTTTTGCCTTATGTCAGTCCTTTTTTGCTTTGACCCAAGTCTAC…
>DN58061_c1_g1_i1	len=695 path=[0:0-694]
ATTTAAGCAGTGCCATCCCAACATTCGCTGCTTCTTTGTCATACAAGACAATGCTCCAACGATTAGTCTCAAAAGAAAAGCATCATTCCTAAAATTCTTCCTTTGTAAAAATTATTGCAAGATAAGATTGGAAGTCAACGGGAATTTCCATTCTTTCATTACACAATGTTCACTGCTCACAAAAGAAATGTGGAAAGACATGAGTAAACATATTAAGATGCCCCTGGTAATATGTCAACCATATCAAAGTCAGGAAACAGTCTGAAGCAACTTGTGTACTTTGCCGGATGTAAATATTGGATATATGCTACAACTGTAGACATACCGGCCCTTAAATGATTTATGAAGTGTTTTGTTTCGTTGAAAAGTTAATTTATCCAGATTGGTATGCAGCTTGCT…
>DN58045_c0_g1_i6	len=581 path=[2:0-580]
TGGATACATTGAACTCTTTTAAATGCAAAATATGTTGCAGAATGATTACACTTCAATGCGAACAAATTTCAAAATGAACGAGGTCTTCTTTCAAACCTGTTGAGCTGTAGCGTTCAACCATGGCATTCTTATAGTTGAAAAGAAAAAAAACTACACAAATTATTTGTGATCCAGCTAATCCAAGTCAACTTTACTTTTGTTTAGTATTGGCATTTCTTATGTGACTCACCCTGAGAAACTTTTACAGAAAGCCAAATAGCAGTCTCTTCTACAACAGGACTTATTCCTTGAACTGAAAGGGGCCATGGCATTTTCAAAGCAGAAAAATACATTCATTGATCGCCATTGTCACCAGCTGTATATTGATAGAGGTAGAATGACTGTTGGAGCGTCATTTTG…
>DN58059_c2_g1_i1	len=377 path=[0:0-376]
GCCGCTCAGTAGGAAATGCTGCCTTAAATTTTGATGTGTATCAGGAGCAGGACAAATTTCGTATGGGTGTTGTAGATCGGATTTCTCTCTGCTAATTCGGATGCTATAGATCTAGTCTTCGGATGGCTCAAGGAGCAGCAGTCATGGTTACAATAACAGTAAAGGCTCTCGCTCATACCTCTGCAGTCTCGGCATGATCACCATAAGGTAAGTCTCGGAAGTTATCACTGTGAAGGGTTCATCTCTAGTCATCTCCGCATTCTGTAGCTGTCACATGATGATGGTGATATCTTTGTAAATATAAGGAGACTTAACAGTGACAAGAGTCACAGTTTCAACATAATGTGAAACAGTGGTAAAAGTGACTGTCTCGGCAT
>DN58005_c2_g1_i1	len=681 path=[0:0-680]
GAGCACCTTTTGTCAGCAAGAGGTATGTTCACTTGTAATATTTTGATTATTATCATTATTAGGATTATGATTATTCTTGTATAAGTAATTTATGTTTAGAAATTTTTATGCATGTGTATTTAATACTTTTGAACATGTAATTGTGGGTTGAATTCTTTGTTTTTATTTGAAAAAACAAGTTCAAAATTTTAATTCATTGCGTGGCTGATGGGGACCACCCTTAAGGGAGGTTTTATGCCACTTTTCCATGGCTTGGTTTTGTAGCCAATCAACACATTTTATTTGATAGGTCGTAACTATTGGGGAGGGTTATGCTTGCATGTCAAAAGCCACACTCCATTAATAGACTGTGGGCTTGTTTAATAGTGCAGTGGGTTGTTGAAAATTTATGGGCTTGAT…
>DN58024_c2_g1_i1	len=327 path=[0:0-326]
AATTTTCGCCAAGTCAGCACCAGGTGAGCTGAGAACTCCCTTTTATGAAATTAGGAGCAATAATTTTGTGACATTCTATTCTATGGGTATGAAATAGTGGTTATTAAGATCATAATCTATTTCCATCTCCTTTTTTCCTCATTGGGTAGCAAGTGATGGATGAACCTAGTTTCTATTTAGTTGGCGGAAGCTACTGAATATTAAAGATCTCTTTTCCATTTATGAATCTGTTAATTCTTTTTATTGTTATTTAATTCAGCAAATCAACCTGTTGAGAGACAATACATATCTCAGCATGAAATTCAAGGTATTTGTGCGTTAATGATA
>DN58024_c0_g1_i1	len=226 path=[0:0-225]
TAATGGCTATCTTTTCCTGTCGCATGATTTACCAGAGAGGTAATATCAATGTATTATTCTTTCTATTTGTTAATGGTCACAGGGTAGCTATATGAAGCTTACATTTACTGCATGATTTTCGAGCATAGATGACAACAGCACTAAGATTATCAAAAGTTCAATAGTCCACATTTTTGAAGCACAGTCTAAAATTTACATTCGTTAGGAAGTTTGGTGGTTCGTTCCA
>DN58031_c0_g1_i4	len=729 path=[6:0-155 7:156-179 9:180-299 10:300-334 12:335-335 13:336-344 14:345-414 18:415-457 19:458-466 22:467-511 23:512-549 25:550-633 26:634-728]
CATTGTTTTACTTCTTGACAGTTATATTCTAGAAATCTAGAATCAACATAAGTTGAACAAGAAACACAATATATGAGGCGGATATGGATCATGGATAAGTCCTGTTGCATCTACACAGAGAAAAGTTCTCTGGGCCATTATCTTATTGTCTTCACCATGCTTATAAACCAAACAATCCAAATTATTTGGGTTTCTATCCCATCATACATTTGCTAACTTAGTTGCAGAATAAAGCCACGGCCTGGCCCAGATGGAAGAAATTGAGAATTCTTCACTCACATCCACTCGAACAAATTTGAAGAAAAACCATATCAATATCATATTATTTAAGACGAGAAACCTTGCCAACTATATAGTGGCCTCCGTCACTTACAGCTTATCATTGTTCCGGATCATGGT…
>DN58031_c0_g1_i5	len=730 path=[2:0-161 7:162-185 8:186-304 10:305-339 12:340-340 13:341-349 15:350-377 16:378-408 17:409-419 18:420-462 20:463-634 26:635-729]
CCGAAGGGAAAGTCACGAAATGATTATAAACGCATCACATCTCAAGATTACGGGGATAGAGAGCGCATTTTTATATTTTGGAATTATTATGGCCAGAGAAGTTAATTGCTCTTACAACTACACATAGGAAGGTTCTCTGGGCCATTATTTATTGTCTTCGCAATGCTTATAAACCAAACAATCCAATTTATTTGCGTTTCTATCCAATCACACATTTTCTATCTAGTTGTAGAATCAAGCCCGGGCCTGGCCAAGATGGAAGAAACTGAAAATTCTTCACTCACATCCATTCGAACGAATTTGAGGAAAAACCATATCAATATCATATTATTTAAGACGAGAAACCTTGCTAACTATAGAGTGGCCTCCATCACTTACAGCTTGTTATTGTTCCAGATC…
>DN58031_c0_g1_i1	len=562 path=[1:0-241 17:242-252 18:253-295 19:296-304 21:305-344 23:345-382 25:383-466 26:467-561]
TAAACCAAACAATCCAAATTATTCGGGTTTCTATCCAATCAGACATTTGCTAAATTAGTTGCAGAATAAAGCCATGGCCTGGCCCCGATGGAAGAAATCGAAAATTCTTCACTCATCCATTCGAACTAATATGAAGAAACCATATCAATAGCATGTTATTTAAGACGAGAAACCTCGGTAACCAGTTAACATAGTCGCCTCTGTCACTTACAGCTGATTATAGTTCCCGATCATGGTCAGGGGCGAGGAGGACAGCGGGTTGCTTGGCCAAAATGAGTTGCTCACAAACCAGCTTAACTCAATAATCAATGAAATACCATTTTGTTTGTTGCCATTCTAATCAGTTCTGTTATGTAGGCAATTCATTCTTGGCCAAGTAACACGCTACACCTTTGTGCA…
>DN58031_c0_g1_i3	len=647 path=[2:0-161 7:162-185 8:186-304 10:305-339 12:340-340 13:341-349 14:350-419 18:420-462 19:463-471 22:472-516 23:517-554 24:555-646]
CCGAAGGGAAAGTCACGAAATGATTATAAACGCATCACATCTCAAGATTACGGGGATAGAGAGCGCATTTTTATATTTTGGAATTATTATGGCCAGAGAAGTTAATTGCTCTTACAACTACACATAGGAAGGTTCTCTGGGCCATTATTTATTGTCTTCGCAATGCTTATAAACCAAACAATCCAATTTATTTGCGTTTCTATCCAATCACACATTTTCTATCTAGTTGTAGAATCAAGCCCGGGCCTGGCCAAGATGGAAGAAACTGAAAATTCTTCACTCACATCCATTCGAACGAATTTGAGGAAAAACCATATCAATATCATATTATTTAAGACGAGAAACCTTGCCAACTATATAGTGGCCTCCGTCACTTACAGCTTATCATTGTTCCGGATC…
>DN58002_c1_g1_i1	len=516 path=[0:0-29 2:30-65 3:66-108 5:109-150 6:151-207 8:208-261 10:262-274 11:275-515]
TAGGTGAATCTTTTAACACATCTTCTGTCGCTTTGTTTCTGCAACAATTTCTCTTTTTCTAATCACGTGAAACTCCGGATTCCTTCCCAGGTCAATGACTCTCTATCCGTATGATGCCAAGGGTTACGGTTAAGTTTCAGTTTTATCAGGACTGTTTTGATTAGGCAAAAGTTTTATGAGGACTGTTTTGATTAGGCAAAAAGTTATACTATATATGTAGGAAATTTACAGAAAAGTATAGAACAGAAAGAGGATTTTTTTATTGGAAGATTAGCAGGATTTATGGAACTATTTGAAGTCTTCAGAAAAAAATATTTCTCGAAGCTTAATGCACCATATCTTAAAGTTAATTGAACGATCCCAGCGTTCTATCCCTCTGGGTTGATTAGTAAACTTTCA…
>DN58002_c1_g1_i2	len=506 path=[1:0-50 2:51-86 4:87-129 5:130-171 7:172-197 8:198-251 9:252-264 11:265-505]
AGTAACTGATTTCGGCTTTGTTAGGTGAATCTTTAACACACGCTTCTGTCTCTTTGTTTCTGCAACAATTTCTCTTTTTCTAATCACCTGAAACTCCGGATTCCTTCCCAGTTCAAGGATTCTCTATCCTTATGATGCCAAGGGTTACGGTTAAGTTTCAGTTTTATCAGGATTGTTTTGATTAGGCAAAAAGATATGCTATATATGTAGGAAATTTACAGAAAAGTATAGAACAGAAAGAGGATTTTTTTAGAGGAAGATTAGTAGGATTTATGGAACTATTTGAAGTCTTCAGAAAAAAATATTTCTCGAAGCTTAATGCACCATATCTTAAAGTTAATTGAACGATCCCAGCGTTCTATCCCTCTGGGTTGATTAGTAAACTTTCATAATAAGATA…
>DN58051_c2_g1_i1	len=290 path=[0:0-289]
AGTGTCCGAAGTTTTCCAGAATCCTGTAGCCATGTCAGAAAGGATATTTAAAATAACACCAAATAATAATTTTCAATTCTTTTCGAACTACATTTTGTTGAGTTCGAGGTTAAGAAGAAAGACAGGAAACTAAAAATAAATTATGAAAGTGATAATTTGGGTCTAGAATGCAAATTATCTCATGCTTTCCAAAGCCAATGTCTGAATGCATTTGCTAAGCCTGTAAACCAATCAAAATATTAACCAATCAAAAATTTAAGAGTATACCGCTAGCAGTTTTGCAACATCAA
>DN58056_c1_g1_i1	len=698 path=[0:0-697]
TTTGGATAAAGCCGCAATGCACCTGGTAGGGACCATCCATCGATTATGGCTTAAAAAATTGGTTATCCCCATGGCATCAGAAGCTGCATAAAGCTTTGCCTCTCACAGCAGCATGGGAGATCTGGTTGGATAGAAATCATGCTCACTGCTATCATTAATGGCATTCTGCTGGAAACTTTCTGAGGTACTAAAAATCCAACAATACATACATAGAGTTATGTGTATGTATTCTTTCTCCATATTTGGATCTTGACTTTATGGAAAAAACAGCAGATCCATATCTAGATCATGGTAATATAGTCAAGACTCAAAACTCATGCCCATTCCAGAAACTGGAACTGTTTGTATGTTTCATATGACTTTTGCTGCCACTGAGATATATGGAACAGCTTTGGGACA…
>DN58057_c0_g1_i2	len=452 path=[1:0-353 2:354-356 3:357-451]
CCTAAAGCGCATAAACACTGGAATTACACATTTATTAACCAAATTATTGTTCTTAGGTGATTCTGAGAGGAGGGAAATTTTAATGTCCTGAGAATATAGGGACATTTTTTTGAGGAAGCTTGGTTATTCATTTTTATTGAACCCTGATGTTTTCTGTCCTGGTAGCTTGGGAAGTGTGAGATTAAATTTCATGCCTTGTACTTGTCAAAATAATTGGAATTTATGTTAACTATAATGCAATTAAATAGAAAGAAAATACAAATACTCAGAGCTCCAGCTGAATGTAGATATACCTCATCCCCGTTAATTTGTTGATGAACAAAACATACCCCTGAAAGGCCTTCAGTGAGAAAGCCTGGTAAATCACCAAAAGAACTCAGTATTACAAATCACAGGATC…
>DN58095_c1_g1_i1	len=293 path=[0:0-18 2:19-292]
CTAATTGTTTAGGGGCAGGAAAGATATGCTCAGCCCATGGAGGACGTGGATGTTTCAAACTAAAAGGATGATATCAATTTATCAACATTCCATTATGCAAAAAAGATTTCTGAGCAACTGATCATTTCTTGTTGAATTTAGCAATCAATCACATATTGTATGCAATTACTATGGTGGTTCTTTTCCCTTCAAATATGCTGCAAGAAGGGCTCACCTTCCCTTGCTTTGTGAAGGAATGGCCGTGTACTCGTTAAACTTACGGAAATGTAAAACAACGTCTCTTTTAGTTAACG
>DN58047_c1_g2_i1	len=892 path=[0:0-891]
TAAATTTGGAGATGTAAATCTGCACACAATCTACCTTGAATAAACAAACAATTGCAATATTTTTCTTGGGATTGAGTTCGCAAATGTTCAAACATACAAAAATCTCAAAATTTAAACAAAAGAAAAGATAAGTTCACCCATCAAAAGATCTGCCAAAAGATAAGAAGTTTAAAACTTAAACAAAAGATAAGAGTTTACCCATATGAAAAGATGGACCAAAAGATATCTTTACCCATGGAAAGATATGACAAGATAGTTTGATATTGTAACAAACAAACGGTTGCAATATCAACCTTGAACAAACAAACAATTACAATATCTTTTGTCGGGGTTTGTTGGTGTGAGTTCTCACATGTTCAGACATACAAAAATTTAAAAATTTAAACAAATATAAACAAA…
>DN58079_c0_g1_i4	len=279 path=[0:0-56 19:57-82 20:83-177 21:178-234 22:235-278]
GCTATTGGAATCTAGCACCAATCACCAATTCCTCTAATTTAACTAGAAGTTATAGTAGTAGCTATTGGAATCTAGCACCAATCGCCAATTCCTCTAATTTAAATAAAAAATTACTATTAGTAGTGGTTAGAATTGAGCACCAATTGCTAATTCCTCTAGTTTAAATAAATTCAAATTAACCAATTCCTCTAATTTAACTAGAAGTTATAGTAGTAGCTATTGGAATCTAGCACCAATAGTGGTAGCTATTGGAATCTAACACCAATCACCAATTCCAAA
>DN58009_c0_g1_i1	len=279 path=[0:0-278]
GGCTATGAGACACAGGTTTGTCTTCAAGTTTTGTAAAAGCACAATTCATGACCATAGTTATATTTTGTCAATGTAGAATAACGAGTATTTACCTCCCAACGAATCAAATTGCAGGTAGGAGTGTTGGAAAAGCATGAATTTTCATTACATACTTGTTTTATGAAATTTAATGCTAAAATATCACATATTTTATGATATGGGTTATTAGGTTCTTAGTCTTTAGCTTGAAAAAAAGTCAAGATAGCTCAATAAAATATTCACCATAGTAATATTTTGTCA
>DN58073_c0_g1_i1	len=590 path=[0:0-589]
ATCGTATCTTTCACCTAGTGTCAGGTAAATCATACTATAAACAATCTGATGAGATTTCATATGTGGGGGATAGATTTTTTGATGTTTCACGGGGATGTGGGATCACATGCACTGGTTCATGTGTGGGTGTGTGCACTGTGCAGTAGGTTGTCATAGTATTCATGAAGATCCCTCCAATGAACTTGAGAGCAAATATAAAGAATGAAGACTTAAATAACCTGGTATCTCACGTTCAATATGTTTCTATTGCCCCCAAATACCCACACTATTCCATGAAATGAAAAACGTTAGCCCACTTCCTCAGGAACTTACAATTTTGGAAATCCAAACACATGCAGCATAACCTACGAACCCTGGTAATGTTGACTGTAGGAGTTCGGTTATATGTCTGTTTAGACA…
>DN58037_c1_g1_i1	len=313 path=[0:0-312]
TTCTGTAAACTCTCATCCAAATCGCTACAACCCAATAAACATAAGATCCAATCAATAAACCGAATCTTTATATATTTAAACCAACTCTCAAAAGCCTAAAGTTTCAAAGCTCTAAACCCCCAAAACCCTGAAAACTCAAACGCTTCAAGCCAGAAGAGTTGAAAATCAAAGCCATTAAACCGGAAGAAATGTGATAGCCCGACCCCAAAGACCCTTTAAACCGTGAGAAGACTAAAATGATAGAAAAAAAATAAAAGCAAAAAGACAGATAAGGCATCATGATACTCACTTGAAGTCAGGTCCATCGTACGGA
>DN2426_c0_g1_i1	len=566 path=[0:0-565]
GAGATTGTTACAGCTCAAGAACCTTTTTAATTAGCTTTTTCAACCAGCTCTTTTTGACAGCTAAGAGTACAAGTTTAAACATATTACGTTTCTCAAAAGCTTGTGAAATTGACGGTTCAAATGGAGACGTAAGCAGATGGCATACATTTGAATTTTGATGCATCGGAGGTTACAGCTTTAATGAATCAGGTGACCGTGGACTGTACTTGTCGCACAAGAAAATTAACTCATGGATTAAGAAAAGTTGAAGTCAGTTTTCGTAGGACACACAGTCGCATTTGCATTGCATTTGATAGGTTAGATATCACAGGTACTGTAAATGTTGTTGTCATGTGCCCAAACGGTAACTTGTTCGGCTTCGTGTTCAATCTCAAAGCCAAACGTTCTTGCTCCTCTGGC…
>DN2468_c0_g1_i1	len=295 path=[0:0-294]
ATGTATGGCAATGATCGTTGATAACCCTGATTAACTGGGCCATCTGATCACATTCGCAGTTTTTGCATTTAAAAAGGATGACCTTGGTGTTCTTATCAGTCTTTGTTCCTGAATACATCTTACGGACTTCCAGAGGAGAATAAACACTTTCCTTCTATGAAAATGTCCAGTCTTTTTGCCAACTGTTGACTAAATGATAGGCAGTTGTTTGTAAGTATTAAAGGTTATTGCGTTTATTGCTTAGGCACTGCCTAGTGACTAACAGTGGAAATACATGTCAGTCAACCATTCTCAG
>DN2437_c0_g1_i2	len=515 path=[0:0-514]
TAGGCCCTCAAACCTAAACGCAAAACACTGCAAAACAATACTAAGATCATTGATGTGCAACTTTGTGAACTGCAAAATTCATATAACAGCTAAGTAATTTTGAACCGCATACCTAATTTGCATGGTCCCAACATGTGACTTCAATATTCTGCACCGCATTCTGAAAGATGGATAATTTTGGGCATCTGCATTTTTCCTGATCTGTCGATTTCTGGATATTTTTAGGCATGTACATTTCTTATCATATTATGACAAGTCCATCGGTTCGTCCAGAGAGGGAGGCCACGGTTAACGATGTAGACATTATATCGAACAGTCGGCCCTTTTTTTCAGAAGAAAAAACAGAGTTTTTTAATTAAAGTAAGAGAAATCGAACAGTAAGCCCTACCTACTATAATC…
>DN2447_c0_g1_i1	len=608 path=[0:0-607]
AAAAGGTAGTGAAGGTGTTGTAGGTGGTGAGGGTGGTGGAGATGATGGAGGTATTTAATGTTAACTTAAAAAGGGATGATGAAAAGGTGTCAATTTTGGTGAAACGAAGCAAGAATTCATGTCTGGATAAGCAGTGTGAACTGGGCGTTATGCGTACGCTTGTGCCTTCAAAAACAGCGAAGGATATACATGTTTCTAATTTGTCCCATTCTTTGTGCCACCCAATTGTTCTCGCATCTGGTGCTCTTAATCTCTCCCAATGCAAATCTAGACACTACTACAATGCTTTGTGTATTCAACAATGGAGCCTAAATGTGTTCCTTTCAATGGCTCATTAAAGGTAATTCATACAAAAACTAACATATTTAGTTCTTACATTCATCAACATTTTATTTAATG…
>DN2487_c0_g1_i1	len=365 path=[0:0-364]
GGGGAAGTTTCGTAGGAGACAAATCCACTTCCTACACTCCATCACTCATCACCATCAAATGGAAACTCTTCTTAATATGGTTATCAGAGATAAGCAAGTAGACAACTATAAACTTTTTGCAGGTTAAGAAGATATCAAGTACATTTTCAGGGACATCATATATAAGTTGGATGACATAGTTGTTTGGTTGTCTAGCATTAAGCATTATACAGTCTCAAACTCAAACACTAAGTCAAACGAGAACCAGGAAGGACCTGAGGCCATCAATGCACTAGCACAAGCCTCCGATCAAGCCAACTCAACAGCTTCATCACCAATCATCATTTTTGATTGAGGAGTCCAATCAAATTTCGACACGCTGGCTC
>DN2402_c0_g1_i1	len=411 path=[0:0-410]
GCACAACAAAGATCTCTGTTAGAAATTGATTGAACCAAAAGCTTTGGAATGATAGCCAATTAGAATTGACTTACAAATAGACAGCAGTGTTGACTTACCAGAGAGCTCTGGATAAATCAAACTTACCAAATACTTAATTATGTTTCTCTGGCCACAATGTCTGAAATATACTCATATATAACTGCACGTGGCTGGGAAGATCTGCTACCACTGTGGTGACAAATAGTAAATTATGGGCTTCTTCCAAAGTTCAGGCACCATATTGTGACATGAATGATTCCCTGGATCAACTTTGTTTTCATCACCATTACTCTGAATTGGACCAATCTTCAGTCGCAGATCTTTAATCTTATATCAATCTTCAGTTAATTTTCTGGTTATGAAATATCAAAGTAATCT…
>DN2434_c0_g1_i1	len=278 path=[0:0-277]
TTCTCTCTAGAATAGTCAATCACTTTTATATTGATATGACCTAGTATAGGCCCCCCTTGGGGTCATAACATTCAAAGTTCAAACTAACTCCTGGAACCCATCATCCAAAGAAGATTTCACAGGAACTAGTCTATTGATTTTGTAGTAGAGGATTTGTGTTGCATAGGGACGACTTTTGTGGCTTTTTAGGAGTTGGTCTAAAGAGTAGAGACTCGTGCCGAGGTGATAGTAGGAGCTTGTCTTATGTGGTGCCGCCCTTGATAAGTTGCAAGAAGGAG
>DN2410_c0_g1_i1	len=438 path=[0:0-437]
GATTCAACAACAGCAACGAAGACGCAATGCAGAATGATGTTTTCAACATACAACCCAAGAAAATCCCACTGGAGAGGCTCAGAAAATGGAGGCTATGTTGATATGGAAAAAGAGGTGTGGCAGATTCACATAGAGAGAAGATATATAGAGCCGCAGTAGTTCAGATACATAATGGGCATTGAGCCAAGATTAAGTATGGAGAAAAAAGACAGAAAAAGAGGCATGCAGTGGGGAAAACATAAAATCATACTAGATTTGCTGCCTCAAATAGAAAAACTATATACCAGGCATGGAAAAGTCTCTGATTTGGTGGCTGACGTTGTCCACTGTAACCTGCTTCCTCCAAAAACCTTGAGGCAATGATAACCCAATCTTAGATAAAGCATTTTCTCTCCGATT…
>DN2488_c0_g1_i1	len=465 path=[0:0-464]
AATATCAATTTTATGGCATCAAATCTATCCAAAGTCATTGAAGTTACTCTCACATAATTGAAACTTTGAAAGTGATAACAGTAATACATTAGATTTATGCCGCCACACAATGTCTCAAAGAAGAATTCATTTGCAGCTCAAAATTAACTGATGAAAAACAAACTCAAGGTCATCAACCATCATTGGCATGGTACTTTTAAGAATGCCAGTTTCTCATGCTTATTACTTCTGACGTCCATTTCATTATAAACAAATTTGTTTTCATAAACTCTAGAACTGATACTGTCAGAGATTTAGTTTGCATCAAGTTATGAATTAAATATAACATACAATGAATTGGATACAAAAGAATGATAACACAGGGAACAATTATTCTCCGAAAGAGATGCACTTTCTCAA…
>DN2421_c0_g1_i1	len=448 path=[0:0-447]
TTAGCAATGAGGAAGCCCTACTCTCCTACCATTTAAGGTGGAAGAAAGGAAACTTTGGATAGAGCCTTGGTTGCTTGATTAAATTTGAAGAATAGTTTGATATGATAACTTGGAATCTCCTTGCTCTATTATCTGTTTGGAGCTCGTCTATTTGTCACTTTAATGTGTGTTCACATCTCCAAAATAGTTTCAAACAGGTTTGTCAGTCAATGAAGGTTAAGGGAGGAGGTCAAGATGACCTTAGGTCTGACAGCTCTATAATCTAAGAATCTCTGTTGGTTTCTTGTTACTTCGATTTGTTGGGGCAGCATGAAAGTATGAGGTGATTGGACAACATCTGTGATGTGTTGAGTGCAAAAACTGGGATATTTCATATTTGGCTAAGTATCTCTCTGATGA…
>DN2407_c0_g1_i1	len=440 path=[0:0-439]
AATAAAAAATAAATACTGCAACTAAATAAAATGTCTAAATGGGTGTGAATACTAGTTAGCAGTAGCATATAAACTACATACCCATCTTCTTTTCCTGGACGGAATGCTAATATCAGGGTCAATATGACATGAACTTCCTTTTCTAAACAAACTTTATGTAAAGGTTGTAAAGATTCATGTGTCTGACACAAAGGTCAATATGTTATGAGCTTCTTTTTCTAAACAAATTTTGATTCATGGATATGACACATTATTCTGAAGATTCATGTATCTCACACATTCATTATTATCAGGATTAGTTTATAACTAGCATGGTGGGCTAAGTTCTGGCTGGTGAACCCCAATAGGTATAGGCTTAGGTTGCTTGAGCAAATCACAAAATGTTGAGTACGATAACAA…
>DN2456_c0_g1_i1	len=308 path=[0:0-307]
GCCAAGAAAAGAAAAAACAGAGTGCACCGTCACAAACCTTAATTTCATATATATATATATATATTAAAAGTTAAATATTTTCATATTGTATGTCTTTTTAGTCAACCGGTTCTTCAACCTGGTTTTTTGGCTAGTTCCAATCCAGTCTGGGTCTGACCCTCAGCTGGTCACAGTTTCAATCCTGGTTTCAGTTTTGATACTAATAGTTTTGACAACAAATTGTGCCTCAGATAGTTTTTTGAAATATACCTTTGATTGCTCTCTCTCTCTCTCTCTCTCTCTCTCTCTGTATATATATATATATATAT
>DN2453_c0_g1_i1	len=299 path=[0:0-298]
AGGCTAATAGATGTTTAAAAAGTATAATTTCATAAAAATAAAAATAAAAGAACATACTCTGTTATGAACCCCTTTAAAATAAATTCAAAGACATATCATTTTTTAAAAATTTACAAATAAAGATAAAGGTACCATTTCATCAATCCCTTGTACCATAAACAAAGGGTTTGACAACAACTCCCCATAGCAGATAGAAGCTTACTCCAAGAGGTTTTTTTATAGGGGGTATTGACAAAAACATCATCATTCCCCATTACAACTACCCACAGCTATTAGGGTCCTCAAAAGCCCTTGAAACA
>DN2493_c0_g1_i1	len=485 path=[0:0-484]
AAATATATATATATACCTACAAAACTTAAAACAATTAAACTACAACCTAACCTATATATACTGAAATATAAATGGGCTGAAATTAAAAAAACCATTGGATCTGGCGGTGAGATCGGCTGTCGAGGGAACTTTGAAGGCAATGGAAAGTGGCATCTCCGGAATTGGAAAGTGATCCTTTTTTAATGTACATAAGAATGTTACACATATAGACCCACAGGAGCATCTCCCTTACCTGGGATGTTAATCACCTCAATTCTTCTGTCATTACAGCAAGATTCCAATCCGATAAACCGTGAGTCCCTAAGTTGAATTTTGAACATTCTGAACTCTTGAGCTTTCTCCAATGAACATATTATATAAAAAATGAAGAGTTTATTATTTATGTTCCTTGGGTATTTC…
>DN2483_c0_g1_i1	len=258 path=[0:0-257]
GTCCATTATTGTTCATACTACATGTCCAAGCTGTATTTTTAATTTTCTACTAATCCGATTTGTTGTTTATGCATTTTAATTGTTATAGAATCCAGATCTTTTAAAACTATGTGTGTGAGTGAATCCACTGGCCTGGCAACCTCTGTTGCATGCCTTAATTGATGTGCCTACCAAGTCAGGTGCCATAATCATCTCCGACGAGTCTATACTGTGTACCATCTACAAAGTGTGCAAAGTTCCCAGGGGTTTCCCATGAGT
>DN2467_c0_g1_i1	len=299 path=[0:0-298]
AGTTAATGCACATGTGAGATATTTGAAAGATATTGGTTGAGATATTCTTGGGAGTTTGTCTCCACTTATGTTCCTTCTCCTTTACACTTGCCATCATCATGGCACATCGAAATTTCCTCAAGGATGGACCATGCAATTCCCCAAGGGATCTATGCTAAGCTCATTGGAAGCTTCTACATGAGGTGGCATCACATGGTTTATTCTTGGAGTTTGACTTGAGTTAGCTTTTTGATTGGTTCTCACTTGGATTTGCTCATTTTCACACTTGGAGAATTCGATTTTGTTTGAGGATTGGTGCG
>DN2491_c0_g1_i1	len=315 path=[0:0-314]
TCTTATTTTTATAAAACTTTAAGAACAGATTCATTGGTTCTTTCGTCGGCTATCTCATAGTCTTCCAATTCCCACGTTCTTAATTGATGGGTTTCAGTTCATGGTTGGGCTGCTTGGAGTGCACTTAACCCACCTACAAAAGAAACGAATAAAAGTAATGTGTGTGGGGTTTAGGTTTTTACGAATCGATGGTTAGATTTATTCCAACGCACAGGAATAGAAATGGATACAGAAAAGTGCTTTATTATCCTGTAAATGCTTTTGGTGAGTATGATATGTACAGAACATCTAGTTCATATTAGAGTGTGAAGGCGG
>DN2424_c0_g2_i1	len=285 path=[0:0-284]
GGGCGTATTCGTATTCCAAGTGTTCTGAAGATTATTGTATAGTACAAACTTTGTTCGTTACAGCCTGCCATGGGCCCATGGCCGCTATACAACCACAGGCTTGAGGGCTCAGCCTGCCCAAGCCTTTGCAAGACTCCCCTCAAACCTGTAGAAGTATTCTCCTCACTCTCTTGGTCAGATTACCTAATTGTACTCTGTGTTTATTCATTGAACATTAATAAAATTATTTCATCATCTTATTCCTATCAAGATGAAGATGACAATTTATGATCATTACATTAAATA
>DN2484_c0_g1_i1	len=297 path=[0:0-296]
GGAACATGATTATAAAGCTTAGATACCAAATGCAAGGATGTGTTGTTTGTCTGCAAAAAATCTCTAGACATAAAACAATGTACTTGAGTTACACAGAAATGAATCCTGGTCCAGATATGGATCAATCATTTGATATATTAGGATCCAGATACAGGTGTGTGTGTGTGTATCAGACCCGATAAACAAGAACTGGAAAAAATAGAGAATCTATTGTGTGTGTGTATCAGACCCGATAAACAAGAACTGGAAAAAATAGAGAATCTAACTTTCAAGAATCAAGATTTAAAACCATTCAAA
>DN2485_c0_g1_i1	len=688 path=[0:0-687]
GCCAACCAACCAATACAAAGTTATATTACAAACAATCTATACAAAGTTATATAACATTGAATCAGGTTCAGAAAACGCTTCTTTATCATGCTGACTTGGGTGCATAACTTCCCACATACTCAATAAAAATTCAAATCTTATACAACCTCTTTCTTGTTAGGCTTAACAATGCAGAGTCAAATCTCAGAGAACTCCTTATCATGCTGGTTCAGGTTCATAACTTTCCACAGTACAAACTCTATATTTTTTGTTTCGATTCTTATTTTTTGTGTTTACACCCTAACAAAAAAGGAACAAGATCAGGACATGCGCATATAGCAGCCGCCAGGTAATGTGAACTTTGGTCCTGATTAAACGCATTCATACCCAGACTCATTAAACTTATAAATAAAATTATTA…
>DN2461_c0_g1_i1	len=211 path=[0:0-210]
ATTGAAGACTTTGGGGGGCATTTGGTCATTAAAAAGCATATGAGAGTAGCATTCTTGACTGAGCTGTCCTTCATTGATTGCACAAGGGGGCGTAGTCGATTAATTTATTTTTCAAGATATCTCGAATAGGGATCAAATGAGTCGGGGTATTATCAAATTTACATCATGTCCAGAGGCCCAACCTGTCCCAAGATGGGTATCACCGTTTGTA
>DN2492_c0_g1_i1	len=252 path=[0:0-251]
GTCCGAAAATACTTGGCAGTGTCCCAGAACTCACTAACTTCAGTTGTCGGCTGTGCTATTAGAATTTCTAATTGAAACTTGAAACTTCAAGGATTCCATTCAAGAGACATTAGGAAGTGTTGTTAACAAGCTAAAATGCTTATAAACCCCAAAAATACTTGGCAGCCTACAAGAAATCACTAACTTCAGCTGTCCCGAAAATACTTGGCAGCCTACAAGAGCTCACTGACTTCAGCTCACTAACTTCAGCTA
>DN596_c0_g1_i1	len=467 path=[0:0-466]
GAACTACGGCTGGATCTACTGATGAACCAACTGATGCATATGAATATGGGCCTAGCACGATCTGCTGATACTGGTACTCGGTCTGGCTCAGACGCTGGACCAGAGCTCCTAGGAACACTGCCAAATGCTAAGAAGAACACTTAGCGCATTTACCAATGGACAAGAGTAAACTGGTTCCTCCACTGGTTCAAGGTCTAACACCTGGAGCTGCCGTGGGGATGGTCACCTGGTCCCGGTTCAATTGATTCAAGATCAAATGCAATGGCTTCAACTTAAGTGACCACCTGTTTTCCTGCCTGCCCCCCTTTTGCCTTAGGTGGCGTAGCCTTCGCGTTTGATGACCTAGCAACTGCAATTGGTTCAACTCGACCCATTAAGAGAACAAGATAGACCTCCTCT…
>DN549_c0_g1_i1	len=476 path=[0:0-475]
GACAAAATAACTACGTCATGCACCAACCAGCTATTAAAGCAAGCTTCAATCATTTAACGGGTCCATTTTTTCAGGAAATAAAAGGGTTGTACACAACTTCGAACAACTTTTACCGACTATAACATTCAAAAATTATTAACAATCGCCAGCCGCAGACGAAATGCAAGACAAGAAATCACAGTTCCCACCAGAAAACCTAAAAAAAACCCTAAAAGACCTAAATACAGACGAGGACAGATTACCGAAAGAAATTGCCAATAAAAACGAAGGGAAAAAAAAGGGTATATTACTCCTTACAACAGAGCAAAACGTCCGAGACAGTAGGCACTGTTTCTACAACTCATACAATTCAGAAGAAATATGATGCACACTCGCAGAAGAAGAGGAGAAATGATCTAT…
>DN594_c0_g1_i1	len=244 path=[0:0-243]
TTATTGCCTAGTACTTTAATTTTCTTTGTAGGGTTCATTGGTCAAGACAATATAGTCAGGTCCTTGTTCTGGAGATAGTAAAGTGGCTATGCTTGGTTTTATAACTGCATCTTTAAGTTTTGGGGCTGTTATGATGAGCCAAATCGTCATCTGCATTTGGCCAGAATTTTAAATTTCTTTGTGGCTTCATTGGTAAAGACATTATAGTCAGGTCCTTGTTCTGGAGATAGTAAAGTGGCTATGC
>DN513_c0_g1_i1	len=543 path=[0:0-542]
AGAATGCTTGCAACAATGCACCATAAAATCTACATTTCTGTGTACCAATAGGATAAGAAAGACCAATTCTAATCTAGGAAGCACATTACTCAGTGAAGAGCCCACTTTGGCATCCAAAAGACTAGCAAATTCAAAAGTATTTCTAGTAACATAACCTTCTTAGAGATGTGGATAAGAATATTACAAAGCATACATTTCTTGCACAATTGCAAAACAAACAAGTAGGAATCAAGCCCCCTACACACCTCTTTGCCCATTTCCATGGAATTTCTCATAGGCATACCAACAAATCAACACAACTTGGCAATGTTTGTTTCGCAGTTGACATGTTCTCTTAAATGAAAATCCTCACACCACGTAAGAACAACTCAGTGTAGGATAGCATAAAACTTTTCTTTG…
>DN586_c0_g2_i1	len=261 path=[0:0-260]
CATATAATTATTGGATGATAAATTAATACCTCAAACACTTAAATTCATGAATTCCAGCAATTCTATATGGATTTAATAGGTACTGTCGGATGTAAAGTCAGAATTCATTTGATTGAGATGTAAGGCAGTGAAAACAGCTAAAAAGGGAACATTACAGTTGAATGAGTGTTACCTTACCTATGAAAAGGTAGCTCACCATTAAGGCCAAGGGAATCTGGTTGGGAGTCAGGGGAGTCCATTCTCTATATGTCAATCAAATGA
>DN511_c0_g1_i2	len=319 path=[1:0-82 2:83-318]
GCAGATTGTATATGCAGAGCAGTCTCGTTAGTAAGATATTTCGTTTTAACGGATTCAATTGAATTTGGTTGAATTGAATCCAGGTGGAGTGATGACACTGCGGAAAATGTAGGCATAATATTAGCCATGAACTGTACCTTCACACGGGGAACAAACCTTGATTTACCGAAAGAGAGCTGCAGTTTACTACAGCATTAGTCACTGTGTTTGGCAAATTTCAAGCATGAAATTCGAAATTTGCTGAACTTCAGCCCTAAAAACCGAATGTCAAGCTGAAATTTTTTGAATTTATTCCAATTTGATTGTTTTAAAGGGGAAG
>DN526_c0_g1_i1	len=480 path=[0:0-155 2:156-479]
AGTATCATGCAACTTAGCATCAACACATTAATGATTTTCCCTCAGCACAAACCTTTCTGCAAAGAAGTAAAATTTAAAATGCATAGACTATTTGCTATTTCTTTCTTTCCACATTTGACACTCAGGAACTAATCCCCATGTTGCCATCACCCTCAGGTATCCTCACCTTGCAGGTAAAATTCACCTAGATCTAGACAGCTATTCGTATTGCTCCATTATGTCGATGTTGCACTCGTATCAGGGGAGAATTTGTCCTCTTATGATGCAAAGCATAAAAGAATAGTGTCAATCTCAAGCATAAAAGAATTCCCACTAACAACACCATACCTTTCTATGTTGTTATCTGGTTGAGCAAATTTTCAGGGGAAGTAGGGAAAATTTGCTTGCATTTAACCTCAT…
>DN516_c0_g1_i1	len=246 path=[0:0-245]
ACAAAATTGACACTTAAATTTCTTGCAGAGCTGATATTTAAACAGAAATGGACAAAAATACCAGGGGACAAAAACAAAATTTGCGTGAAGCTTCATAGAAGCCATCGGTTTACTATTATTACCCCAAACGACATACAGTGCACCGCCGATGATGCTGGAATGATTCTTACCTGACGAGTATGGGCTTATGTGAAAACTAGGCAAAACAATAATCCAATCATGACCTCTTGATGAGCAGAGCACCTG
>DN579_c0_g1_i1	len=211 path=[0:0-210]
AGTTTATTATATATAGGTGTTTTTAAGCTGATCTGGCAATGGAGATGGATTTGCATCTAAGCTTATTATATATAGGTGTTTTAATAGGTCCAGTGAAAGTTTGTAACTGATCTTTTTATAAATATAGTTGATTAATAGTTGCTGATGCGGTAATAGAAAGAAGAGTTTAGTTAAGGTTTATATATATATAAGGTTGAATGTTGTCTATTGG
>DN539_c0_g1_i1	len=248 path=[0:0-247]
AAAAAGGAAGGGTTTTATTTTATTATGAAAGTAAGATGCTTTGATTTTGTAAGATTCGAGTGCACCTTGACTACCTACAGAAATCTAGTTTTACTATATTGTAGATGCTGGCAAAAGAGTTCAGTGACTCAAAGATCTGAAAACCATTTTTTATGCAATTTTCTTATCCACTGTGCTATGGTATTTTATCATGCAGCATACACATCTATCAAAATCTGATCTTTCTTTTCGAATGTAGATGCAAACAG
>DN587_c0_g1_i1	len=289 path=[0:0-288]
AGGCTGTAGTCTATGACATGCACAACATGCACATTGCATACCCACAATGCATTGTTCTCTTTGTTATCTTCTTACAAAGATGTGCTTCATTGTTTGAAGGTGTTTTTGAATATCATTTCTCACTCAGATACCATGGGTTCATCTCAAAACCCTAACCATACCTGTCCATGCCCTTTTAGATTGGATCTGGACTTGGAAGGCTACCATGAGAGATGTATGCAATCAAGAATTCTTCTATTTTGCATTTACTTTGAATACTTCATCTTATTTGATTATTCTATTATTTGGA
>DN522_c0_g1_i1	len=205 path=[0:0-204]
TACACAAATGGAAGGACAAATACTAATACTATTTGGGAAACGAATCGGGTAGATGGGGGTATAACAAACTCTTTTAATGAACTGGCATCTATGGGAAGAGATCACTTCAAAATTTTGTTCAGAGCCTTAGATGAGGCTTCAATTGTAGAGGTAATATGGGTGGCTTAACGGTTCCCTAGATATGCAGAGGAGGAAGAAAATGAGG
>DN554_c0_g1_i1	len=454 path=[0:0-453]
ATGCCACATTTATTTTTTATTTAAAATGTGATTTTTTTGGTTGCAAAGCTCAGTTTCTGTAAAGTGAAATACAGATTGAGTTTAAAATGTCATGGGAAATGCAACATGACATTTATTTTTTGGAAGGAAAAGCTTGTGGGAAATTCCAAGAGATACTTCCATACATTAGTGGATCACATCCTTAGTAAACTGGTTGGTGTGGGATATGTACCTCATCCAAGGAGATTCAAACATAGCACCTGTTGGCATGGAATTAGGTGAATGCCCAGCAACATTGGTGAGAACTGGTCGACCTAACCCTTTGGGCTAAAAGCAACAAGAAATTTGTCTAAAAAATGTAGAAGATATTACAAATTTGAAATTGGCAGCATGCTTAAGGCTGTGCTTGGATTTCTGTAT…
>DN536_c0_g1_i1	len=462 path=[0:0-461]
ACTTTGACTGGTAGGGGAAACTCTTCTCTCTGCATCAAGTAATATCAACTCTAGTAACAACATTGGGTGTGAAGGAGATAAAATTCATAAAGGAAGACCAAAAAAGGACACAACATGAGAAGAAGATAAAGGTAAAGAAACCTGTAAAGATTCAAGAAAGTAGAATAAGATCATGAATGAAGATTAAGATGTTGGAGATGAAGTTGCACGCAGGGGAATGATGAAGTGGAACCCTTGAAAGTGGTTGAGGCTACTAGAAAAATGAAAGAGAAATAAGATGTCTACTTAAAGAGAAGAGAAGATAACGCTACACAAAAGATTGCTAGAAGACAATCACTTCAATCACAGAAGATTGCTAGAAGAGTCAGAAGGAAGAATAGTGAGATGCCTGTCCCCTGC…
>DN528_c0_g1_i1	len=254 path=[0:0-253]
TTTTCTAGAAGGAAAAGAAGTAGATGCTTTACAAGGTGTAGGAGATATTTTCTACTTTGTTTCAGAAAAGTAAGATGCTTTACAATCTAGAAGAGTGAAAAAATGTATCATGATCTGTATATTCCTCTCTGTTATAAATTTGAAGTACATAACTAGATGTACCTCCACTTTAGGTAACATCGTCTAACTAAATTTTTTTATTAATATAAAATTTTTATTATTAATAAAATTAGTTTAAAAAATATTTTGAAAAG
>DN574_c0_g1_i1	len=263 path=[0:0-262]
CTTTATTTTAAATTGTTTAATCCTCATATTTAGTATATAGATAATAATAAACGTAAAAATAAATAATTCTTATATCTCCCATCACAGTGAATGATTTACCAAAACGCTAAAATTGTTACCAAAATTTGCTTTTGATTCTCCAACGAAACTGTTTTGTTTTCAGTTTTATTTTGATAATTCCTTATATCTCCCACCACAGTAACTGATTTACGAAAACGCTAAAATTGTTACCAAAATTTGCTTTTGATTCTCCAACGAAACTG
>DN534_c0_g1_i1	len=817 path=[0:0-816]
GTTCACTTGACTTCCTTTCTGGAATTTCTTTTACTCTGTAGTATGCGTTGTATGACAATTTGACGTATGCATCATTTAACGTAAAATGTAAAGTGTGTGCTATACGTTGCTCAATTTTACTTGTGCCATGAGTAAGAGTTTCTCTTGCATGGCTTGTTATGGTTAGGCTATCTTCAGGAAGGTCAAAAAAGTACTTTCCTGCACATTATAGTATCTATGATGCCTCTAGCCTCTTTGAGGAGATAGATAATGATGGTGCTACGAGATATATGTTTAATGATTGTTGGAGTTTGCTGGTGACTTTTGCATGGTGGTGTGGTATGATGTTGGTATCACTAGGAGGGGGTGTTTGACGTGGGCCTCGTGTTGGATGTGTGATGGGAACATGTTTGATGGTTG…
>DN527_c0_g1_i1	len=986 path=[0:0-985]
AAAAAAGTAAAAAAAAAAGAAACTATAAAAAAACATATACAAAGCCATAAACAAAAAAAAGAGTTGTCGACTAAAGACTGCACAGTGCATGCAGTGATAGCCATGCTACACACAACAACCACCACGACATTTTCCATCACAAGCCCCGTCGTCTTTCTTTGCCTGACGGCCACACAACCACCGTCTGGGTGTTGTCTTTGTAGTTGACATTACTACAATATATAGCCACCATCACATAGTCAGATTCCTCGGTCCACCCTCTCTCCACGCTGCTGCAAATAAACCACTGCCACAGTTTCCTTCTCGTGCTACTTCTGTCGATTTTCACTTCGACATTCACTAGCCACCGCTCCCGCAGCAACAACCACGTCCCATCTACAACGCTATCCAAAAAACATT…
>DN593_c0_g1_i1	len=1131 path=[0:0-1130]
GGGAAGAACTTGCATTATGAAAAATCAACAAAATAAGCGAAGGAAAAAAAACTATACAAGAACAACAATGCAAGTGTCCAGAATGCGGCATTGCATGTCATTGTCAAACTAATGCAAGCACTAGTAACTGGCAATTGACAAGAAACAGAGAACCTGAAAACCCAGCAGTGGAATCACAAACCCAAAGATGAAATTTTAGTAGAAGCCATGTGCAAAATCGAGCACCCTAAATTCCTCTCTCAAAACATTGAATGGGTTCTAAACACTACTCCGCCACGGCGCTATCCTCAACTAGAAAAGTGGTTTTCATCTTCTCGTAATTAGGGCTCTTATAAAATTTTGATCCACTATTAATAGCCCTTGTCGTGTCATGCCAATAAGGTCATTGCACTGCATTAA…
>DN45162_c0_g1_i1	len=1045 path=[0:0-1044]
GTGGTACACTACAAGCATGGCTTTTTTAGTTTACATTATTCCAAGTTATTGACGATAGCTTAAACAACAAGGTCATAAACAAGTACACACAACCCAAAGCTTCATGAGGAATTAAACATATTTCCCAGATGAAGTTTAGTTAAGTGCAATATTATGTATCACTCTAAAGTTTTGAAGATCTAATCACATAAAACTTATTGCATCATCTCAAAGTTTTAGAGGATCTGAAATGATGCACATAAAGTTAGAAAGGCTACAATATAGCACATGCCACACAACAAATGCTTGGCAATGATACATGAAGATCTCCCAACTACAAAACATATCACACGAAATGTTCCAAATGATGCAACATAATAAATTTCACATAGAAAGTAAAATGGATGTGTTATACATGGA…
>DN45196_c0_g1_i1	len=912 path=[0:0-911]
TTAAGCTTTTTCACATTATTGGTTACTACCAAAAGAGGTTGAATATAGGCTAAAACGCCTAGATATCATTCTCCATGATCTTTGGCTTAACTAAACAAAGAGTGATTGTGCCTGGATTGCTGCCTTTGTAATGTGGAAATGTCCTGCAATCTTTGCCTGTGACAAGATGCAATAGCCCTAATTGGACAACATTGAAACTATCTCAATTCAGTGTTTAACTACCATGACCAATTACTTCATTTTTCCATAGCAGCTATTCTGCAATAATATTACATAGAGTGAGGGTTAATTTGCACATGGGCATCTCTCTTTTGACAATGAAGGCAATGTGCTGGCTCTCATCTAATATATGTTTCTATTATATAATAAACTTATGGTGTATGAGTTATCCCCATTCTT…
>DN45137_c0_g1_i1	len=283 path=[1:0-88 3:89-194 5:195-282]
TAACCATCAAATTATTCAATCCCTAAATAAAGTTGATGTATCCAACCCTCTACATAAGCTGCACAATAATACTTACCTGTCTCCAAGGACAGACCGGTTGCGTAAGCTGCGAAATAATACTTACCTGTCTCCAAGTCAATTCCTCTCTTGGAGAGAAGATCAACAACCTGATTTCAGACAGGTTGGGTAAGCTGCAAAATAATACTTACCTGTGTCCAAGTCAATTCTTCTCCTGGAGAGAAGATCAACAGCCTGATTTCAGACAGGTTGGTTAAGCTGCGAA
>DN45137_c0_g1_i2	len=387 path=[0:0-168 2:169-181 3:182-287 4:288-386]
AGACAGGTTGGTTAAGCTGCGAAATAATACTTACCTGTCTCCAAGTCAATTCCTCTCTTGGAGAGAAGATCAACAACCTGATTTTAGACAGGTTGGTTAAGCTGCGAAATAATACTTTCCTGTCTCCAAGTCAATTCCTCTCTTGGAGAGAAGATCAACAACCTGATTTTAGACAGGTTGGTCAGACCGGTTGCGTAAGCTGCGAAATAATACTTACCTGTCTCCAAGTCAATTCCTCTCTTGGAGAGAAGATCAACAACCTGATTTCAGACAGGTTGGGTAAGCTGCGAAATAATACTTACCTGTCTCCAAGTCAATTCCTCTCTTGGAGAGAAGATCAACAACCTGATTTCAGACCGGTTGCGTAAGCTGCGAAATAATACTTAC
>DN45137_c0_g1_i3	len=374 path=[0:0-168 3:169-274 4:275-373]
AGACAGGTTGGTTAAGCTGCGAAATAATACTTACCTGTCTCCAAGTCAATTCCTCTCTTGGAGAGAAGATCAACAACCTGATTTTAGACAGGTTGGTTAAGCTGCGAAATAATACTTTCCTGTCTCCAAGTCAATTCCTCTCTTGGAGAGAAGATCAACAACCTGATTTCAGACCGGTTGCGTAAGCTGCGAAATAATACTTACCTGTCTCCAAGTCAATTCCTCTCTTGGAGAGAAGATCAACAACCTGATTTCAGACAGGTTGGGTAAGCTGCGAAATAATACTTACCTGTCTCCAAGTCAATTCCTCTCTTGGAGAGAAGATCAACAACCTGATTTCAGACCGGTTGCGTAAGCTGCGAAATAATACTTAC
>DN45168_c2_g1_i1	len=225 path=[0:0-224]
GTTTCTGCTTGACTATTCATATCAATTTACAGAACAAACGCAGTTTTGTTCTATAATATATAATACAGGGTTTTGGATACATAGTGATAGGGTTGGTTAGTATTTTGGTTATTTTTATATTTATGGTTGATTTTCAGCATATTTTGTAATTATAAAATATGGTCGAACAAATAATTGACTATATCTATATATGTTTAATTGCTAAATATTCAAAAAAATCATGCG
>DN45181_c0_g1_i1	len=544 path=[0:0-543]
AATTAACTTCTTGTTAAATGAATGTGTATGGTTCGATGGGTCACAATCCTTGAATTTGCCCCACGAGCATACTTCTTTTTTTTCTTTCTTTTTTCTTCTTCTTTTTTTTCTTCTTTTTTATTGTTTGATCTAATGGGTTAAACCTCAGTGGCATAGAATGCACTCAAGAGTCTATATGACTATGTTGGAAGTGATTAGGTACATGAAAATTGTATTGCTCCACATAGCTTGATGGAAAATGGCGGTTGTAGGTGGCACTAGAGGACGTGGAGCAGCATGAATAGGAGTGGCACTGGGAGGGCGTAGATGGAACTGTGTACAACTTGCAGTGAGATTAAGGTCCATCGAATAAAATTCGACAGTGCTTGTTATATAAACTAAGACTCTGTTGTGTAACTA…
>DN45187_c0_g1_i1	len=853 path=[3:0-832 5:833-852]
CTCAGACCATTTGAAGAGAATCTAATGCATCGATGTTTCTGATAATATATATTTTCAATTTCAACTCCATGGAAATATAAGGAACCCTGCAGTTTCTGTTTAATGAAAATTTTGTTTCCATGGAGCTGAACTTCATCTTTAATTTTTTCTTTTATATGAGCCTTCGCAACTTCATGTGTCATTTTCTTACCTTTTACTGGTGATATTTTGCCAAGCTTCTCTAACACAAATATTTACAACCTTAGACATGTGATGTCAACCAATAATTTGTTAATGACTTTGAACATGTAACATTAGATTTTTGGTGGACAGCATTTTGTTCTTGGTTAATGATTTTTCTGACGAAAGAATATTTTCATATTTTCTAAATGTATTGATGTTTTTGTTTCTGTTACCCTT…
>DN45112_c1_g2_i1	len=239 path=[0:0-97 2:98-142 4:143-238]
GACTCCTTCAAAAACATAACAGTAAGTCTTAGCCAAACTTAACAAGATTCAGTTATACTGGTTTTTGCTGTATGGGAACTCCATAAAACTGTGAAATTGTCTTTTCACAACTTTGTACAAGATACTCGTATTTGATACTATTTGATTTATACATTTTTACAAAATTGTATTGTGTCAACTTACTTTGTACAATATATTTGCATTTGACACAATTTAATTTATATATTTTTTACAATGAC
>DN45112_c1_g2_i2	len=258 path=[0:0-97 1:98-99 2:100-144 3:145-257]
GACTCCTTCAAAAACATAACAGTAAGTCTTAGCCAAACTTAACAAGATTCAGTTATACTGGTTTTTGCTGTATGGGAACTCCATAAAACTGTGAAATTTTGTCTTTTCACAACTTTGTACAAGATACTCGTATTTGATACTATTTAATTTACACATTTTTACAAAATTGTAGTGTGTCAACTTACTTTGTTATACTGGTTTTTGCTGTATGGGAACTCCATAAAACTGTGAAATTTTGTCTTTTCACAACTTTGTACA
>DN45104_c0_g1_i1	len=385 path=[0:0-322 1:323-384]
AAACAAACAAGTATGGACTTAAAACCCATTTGTATTAATTACAGAAGCTTGGATAGCCCAGAATAATTACAATTACAATGCCTCAGAGAAAAGATTTGCCATATTTAAGCCTCTACCACGCGAAAACAGAGAAGCGAGAATTAATACCGACATTCAAGAGGAGAAATGCAAAACTGTAACTCATTTTGACATTCAAGCAAGAAACGAAAAATTGTAACAGAAAAACTTGTGAACTTGAGCTAGGGAGAAACCCTTTCATGAGATGCAAATCGGGTTTGGGGTTGCCTCCGTATAGTTGTACACCATGTGGATAATCCACGGCCTGCAGGGGGCAAACCCAATGATTAACAACAATGTCAACCTGAGAGGTAAACCAGTGAGCTAA
>DN45104_c0_g1_i2	len=507 path=[0:0-322 2:323-506]
AAACAAACAAGTATGGACTTAAAACCCATTTGTATTAATTACAGAAGCTTGGATAGCCCAGAATAATTACAATTACAATGCCTCAGAGAAAAGATTTGCCATATTTAAGCCTCTACCACGCGAAAACAGAGAAGCGAGAATTAATACCGACATTCAAGAGGAGAAATGCAAAACTGTAACTCATTTTGACATTCAAGCAAGAAACGAAAAATTGTAACAGAAAAACTTGTGAACTTGAGCTAGGGAGAAACCCTTTCATGAGATGCAAATCGGGTTTGGGGTTGCCTCCGTATAGTTGTACACCATGTGGATAATCCACGGCCCACTGCGTAGGAGAAACAATAATCCGTAGCAAAGATTGCCAAGGAGATAGACTATATTAGGAGCATCAGGAAACGC…
>DN45140_c0_g1_i1	len=392 path=[0:0-391]
ATCCATTTAAAACCCAAAGAGAAAAATCACCTTAAAACTTGATTGAAACCTGTGAATTATGTCCGTTTAAGGAGGAAGGTCGGATAAAGATTTAAGAGCTAGGAGACAGTGGGGCAGTAAACTGGGAAACTGGGAGACTAAATTTGTTCCTGCAGAGAGGGCATTCAAGTCTAGAAAGTTCAGAATGAAACCAAGAAAAAATGCAGGTCCCATGAAAAAGGTGACTGCAAGGCAATCGTTTTGTTTCCTCTTCGGTGGACAGCGTCTCATGACATATTGCGCATATTAATGTGTCGCCCTCGCCATCATCATCAATGGTTACGGTTTCAGCAGAGGCAACAGCAGCCATAGCAGCGGCTAAGGGAAAGGTCATGTAGAGAGCAATGAATCGA
>DN99911_c0_g1_i1	len=279 path=[0:0-278]
GCCCAATGTTCTCCCAAGGCTAAAAACAAAGTTTTGAAGGATGAACGATTTATCTCAGTCTTCACAAATTATAACGAGATAATATCAATAATATGTCTCCCTCTTCAAAATGATGTTCTGTCATAAACTGATCGGCTTGTTGCTTTACTGTATTCTTGCAGCAAGGGTAAGGTTATCCTTCAGAGTAGGAAGAACGTTCTGCACTTGTTGAAGAGACTCAACTGCTGCTGGAACAATGGAGTAAAATGTTTCAAAAACCAAGGTTCATAAACATATAAT
>DN99996_c0_g1_i1	len=421 path=[0:0-420]
GGGAGACCAAACCGAAAGGGTCGCAGGCTTTAGAAGTTAAATTACAGGGGGAATATGAGAAATAAAGTGGGAGAGATGCGCTTCTTCACGCGCAAGGGTCGACAAAGTTGGATCACAATTTAATAATAATAATATCAATTGGATTAGAATATCATATCATTTTGAACAGAAAAATGAAGCCTGTCCATAGGCAATGGCCCATTGAGCTCGAACTGATACCAAATCTCTGCCATTCCTGCAGAATCACAGCTCCAGTTTGTTATTGACATCATATCGTCTCAAGTTTTGTTATCGCCCTTCCCTGATCAATTCACTAGCCTGAAAAATCTGAGCATCCCAATCATAAATGGATCGAGACTATTAATTATATTCAGTGGGTAGTCCTGGTGGTAAAAAATG…
>DN99922_c0_g1_i1	len=202 path=[0:0-201]
GGCAGAAGGGGGTTTTCAACCATGGATTTTAATTTACCCTTAGAAACCATGTTGAAAAGAAAAGAACTGGAATTCTCAAATTACCCGAGAATTGGTTGGATGAACACTAGTGGCTCGATAACTAGTAGCAATGACAGGTCGGTTTGTTCACTGGTTGTAGTAACAGTCGCAGGTTGGAAGATTCAGTTGTTCAATGCAATGA
>DN99961_c0_g1_i1	len=407 path=[0:0-406]
CAAAAGAATAAGAATAAACCCCATCAAAACTCTCACCAAAACATAGTCTCGCTAGATATCGATCTTCTTCTATACGGAAAGCATTTTTTAATTTGGATTTTCTACGTTTTGCTGAAATAACTCTGAACTTCCAGCAAATTAACAAGTAATGTTGATTACAATCCAGTGAAATATTCTCATGCTTGGTAGATCCCTGGCTTCGACTTCTAAAATCTTCAAGCGGGTAGTCGTTTCTTACCGCATCTATGTCGTTGTCGACAAGGGTAGTAACAGGGGAGAGGGAGCCGCCTACAAACAACCGGTCGATGCTTTGCTCAAAACTCTGAAATTTTGAATGGAATAAATTTAAAACAATTTACGCTCCACACGAAATCTTTCTTGTTAAGACAATGCGTCTGG…
>DN99976_c0_g1_i1	len=206 path=[0:0-205]
ACATTGGATAATCCAATCTAATGGTTCTTAGTAGGAGCCCTAAAATGTTAGATAAGTAGACGTGACGAATGATGCCCTAAAATGTTAGATAAGTAGAAGTGACGAATGATTCACAGTGATGGGCTGGAAAGGACAGTGCACCACTAGATTGACATGCCAAGAACAACATTTATCAAATCCTAGCATTTGTCCAACGATCAGATACA
>DN99901_c0_g1_i1	len=219 path=[0:0-218]
AATGTTTTTTTATTTGATACTGTAGATTCATTTGAAACTTGGTTTTGGCTATGGATATTAAAATGAATTGCTTCTAAGGTTGTCTTCTCAGAATTTATAAATCATGTGCTTAGATTATCTGCCAGAAAATGAGAATATACATTCAATTTTCTGAAGAATGGTGGATCTGTATATGAGCTATAAATTGGCATCTAAAACTTTCGTAATGTAGAATATATG
>DN99941_c0_g1_i1	len=316 path=[0:0-315]
TGGATTGAGGGGGCTAAAATATTTGTCACAGTTTCATTCATCCAGATGGCAAAAAATCACTATGAAAGTTTGTTTCATCCTAAAACTGTACAAGAAACTAACAATTTAAAATTGCATTGCAGTTTATTTGTATGCTACAGTTCAGAGCACTTTGTAAGGATGAGAAGAAATTGATTTGAATGATTTCTTGAATAATGTTGTATTATAGGTTATGAACTTATATTCTTTCGATGCCACAGCAGGTAAAGAAACATATTCTTTAGTTAACAATGTTTATAGCGAAGAAACTTGATGTGTCAATCTGCTCACGAACCTG
>DN99968_c0_g1_i1	len=232 path=[0:0-231]
GGTCAGTCTCAAAACTAATTTGAGAGCCATCAATTCACAGTGATAATTTGTTTCCTGACCTATTCCAGCCTTGAACGAAATGCTATGATTTGTAGATAGATATTAAATTCCCCTTGATCCTCCCTTGGGAGTGACCCCCTGTGAGGCACCATAAAAGTATGGCCATGGGATGTTTTTGTTGATTACCTCTTCTTTTTGCTCAGGAAGGATTTGTTTATCCCAAGTCTCTGGG
>DN99928_c0_g1_i1	len=379 path=[0:0-378]
GGTATTTTGGTTCTACAATTGCCTATTGCTGTTATAATCTATTATTTTCTGCTCCAAATTTTGCTATATTCTATTATTTCTGGTCTGAATATTCTATTTTGCTAATGAAGAATATCATAAATGGTATCAGATAACTTTCTTATGCCGAGATTTTTAGAGAGAATTTTAGACTGGAGATGTATTTTGGTGTGTATAAATAATACAGTAATCTATTGTTCAGTGGGAAAATCTGCAGTTGGAGAAGAATACACGCAGGAAAAAAATGCAGTTTCACTTGCTTGGATACCTTTGTAACCCCTGCTTGTACCCTTTTGATAGTACCACATCAGAAAACACTTATATGGAATTTCACTTACCCATGATATATTATAAGTCCCCA
>DN99965_c0_g1_i1	len=587 path=[0:0-586]
CAAGATTCGATTGTATTGGCCATTGCTATACAACAAGTCAGCAATGGTACAAAATTCAATGAATTTTTTGTGAAGTAAGGATAGGTATGGTCCATTTACTTTTTAATGTTTTTGATAATATACCTTATGTCTTTGATACCCATCCACCCATAAATCCCCCAGAAAGGCCAAAAATATCTTTTAGAAACCCAAAAAAAACCCTATAGATATAAATTAATCATCAAATGTTTAAGGAATGTTTTTTTAATAATTTTGTGGGTGTCCATAAGGCTGAAATTCCTCTAAAACCTGCAAAATGCATATTTTAATATCTAGGAGAAGTTTACTTCCGTATTGGAGCTATAGTGAATATTTTTGTTCCATATTATTTCTATCCCAAATAGTATTTGAATCTTGCTA…
>DN99978_c0_g1_i1	len=205 path=[0:0-204]
GTGGGCCATCATTATTTCACTCATTAATGCAGACCATAGCGAATTAAGTATCCTCCGAAAACAACTTTTAATGGTCAGCATGAGTCACCTATTGGAAATATTATTATTATTGGATTTTGCGGATGGTTTTTATATTGATGGGTTATTGGTGGTGTTTTTTTTTTACAAGTGGGAAAACTTTTCCTAACTTAGTTGTCAAATCAGC
>DN99933_c0_g1_i1	len=394 path=[0:0-393]
GTGGTAGTAAGCTAGCAATTGAGATCCCAGTTGGGCACCGTCATCTTCCTAAATCTGGACAGCACAAGGTCAAACCTTGGTCGTGGAAGGTTAATACCTTGATCTGTAGGAGCAGTCAGATTCAGTTCGCTAGGACAGTTGAGAAGCAGTAAGAGATAGTTGGGGCTGGCACCAAACGTCAGATTTAGCACATAGAAGTGTTAGCAACTGTTGTGAACCTAAATTTGTAGTGTGGAGTATTGGGCTTATAATTCACTATGTACTATTGAACTGGTATCATGTGCCTGAATCTATTGATGCAACTGAATGTGAATTTGTGAGCTATTGACGTAAATGATGTAATCTACTGTTTGCATACAATATTGTGCACTTGATACCATTACTGTCTAAGATT
>DN99998_c0_g1_i1	len=240 path=[0:0-239]
AAATTCTGTTCTCTTCCATACTCTTAAGTGCCTCCAGTCCTTATCCATGTGCTACCAGATCAGTGTGTACGTAACTATTCGTCTTCCTAACATCTATAGGATCCTCTCTATTGTACAAAAGCATCATTTCTCGGTTTCAGTTTATGCAGTATGCCATTCAGTCACCATATGGCATAAAATCATGACTTTCAACATTTAAGAGCATTGACAATCCACCTATTGAAGAGCATTGTCAATCCA
>DN99967_c0_g1_i1	len=283 path=[0:0-282]
GCATTTGTTTGATGCTTCTAGAAGGTCACTAAAAGCATCCAAATATGGCAATGAAATCCTGGTTTCTATAAAAGAATTTGTACATAAGCATTCATAAATTGTAACTGATTTTCTAAAAGCATGATGTGATTATAATTGAATACGTAAGTACCTTAGGGTAGGTTGCATCAGAAAATAGAAGCAAACTGCAGGCCAAGCATCCAAGCAAGGGTAAAAGTATGTGGCAAAACAAAGATAGGGTAAAACGCCCAAAAAAAAGGAATAGGTGTTTTAGTAGTTACTG
>DN99997_c0_g1_i1	len=296 path=[0:0-295]
TTTATCTCTATTGTAGATTCCCTCAATATTTGGCCATGGGACGGATGTCAGACATTTTTATTTTGATTGTAAATTCTTTCGATATTTGACAATTGGACAAATATTTAAAGCGGAAAGCCTAGGCTGGTTGAAGCATGGTCTCCTTGGCCGTGGTTTGTCCGGTATTCTTATCTCGATTGCTGACTCCGTTAATATTCGGCAATCCAAGGGACACTGCTTAGTAAAAATGTGACAGAAACAATGTCCATCAGATTACTAAATATTCGAGAAATCGACAATCACGCATTGGGTTTTGG
>DN99940_c0_g1_i1	len=390 path=[0:0-389]
GTTATTGCCTAGGGTGAATCTTGAGAACAATTTTGGCATGCTAGCCCAATGTATTGGCCAGGCCACATTGCATCATATTGGGGTGCCTTAATCGACAAAATGACTGGGATCTCTGTGTAGGGTGTCATTGGATCGAATGGAGTCTTCGTTGTAGAGATAGAATTTTGGATGTCTTCCTATTTTGACTTACTTGGAATCGACTTCAAGTTGTTGAGTTGGAGCAAGTCAAGGTCTGTCTTAAAGGAATTTGTCTATTTGAAAATGTGGGAGGACAACCCAATTGGCTAGAGAGGAATCAGGTTAGCCATGTTTTGAGAAAAATTCGAGAATCAACCTATCTAGATGAAAACAAATGAATAATTATCTTTCATATAAAAAAACCACTGGAGA
>DN99947_c0_g1_i1	len=318 path=[0:0-317]
GTCAGACTCATAGCTGCGGGGATTATTATTTTTTCATGGTAGTATAGAAATGAAGCTTAAACGCTTTTAGAGCAAGACGTTTATGGCCAGGGGCAATAGTTGACTCCATTAACGCTTTCATTATATTGAACAGGGACAATAGTTGACTCCATAAACGTTTGCATTATTGTAGCTATTATGGTAGCTCCAATGTGGGTGGAGGTTTGGTCTCACAAGTCCGGAGTCCCGAAGTCTATTCCAGGACGGACAAAGCTGATCCTTGATTCCTGCGAATAACAGGAAGAATATATATGTATGAAAAATAAAAATAAAAGTCCA
>DN99931_c0_g1_i1	len=471 path=[0:0-470]
GGAATGCAAACTGTAGACAATTTTATTGAAAGATGCGAGGACACGTAAGACAAGTTAAATTGACAAGTGATTCGACACTGATCAACTATAGCTTCGGTCAGCAAGACAATGAAAACTCAACTATAGCTTCTGTCAGCGATTAAGACAGTGGAAACCCTACAATGATTTCCCTGAGGCAGAAGTTTGACAGCAGATAACTTACGGAAGAATTCTAATGCTTGATGAGGCAACAACAGAATCCAATCTGTTAATTACCGATGCACTCACTGAAGCAGTCCATTGATACCATTCGTGGTCAATTGTGGGAGTTGGTCTGCGGACAATTAGATCCGATAAGGCAGGGATTGACAGAGTCAAGCCACGATTTAGTTGCAGATCACCACCGTAGGGCAGACGACT…
>DN99944_c0_g1_i1	len=335 path=[0:0-334]
GAGGTTTGCAAGTTAGCTTTATATCTTTTCCTGGAGATCCGGAGTTGTCTAATGTGCAGAGAGTGCATGACTTCAGCATCATATAATCAATAGTTGACTGAGTTATGCAATCCATGCTAACCACCATAGATATTTTTTTCTTCTTTCATGTTTATGTTTTTGGTGAAAAGAGTCGATGTATAACCGTGGTATCAAAGCTAAGTTTGTGGTTTTCATGTAGGAGGAAACATGACACAAGTAATGATTATGTAGTGTCAATAAATTTTAGGCACATGAACAAAGTGGTAGCAAATCTACATATTCATGAATTCAACATGTATACGTTCACTGTTTTG
>DN99905_c0_g1_i1	len=214 path=[0:0-213]
TAATAGATGACCATCCTTGGCTTTCCTCTTTTATTTTAGAAGTGCTTGTTCAACATAAAGGACTTCAGCTAGGTTCTATCAAATTTTTGGTCAACAGCTCTGCTATTTCTGAACTGCATAACTCAAGCTCTGGTGATGACATTTGATTGGCAGACGATTTTGGTGTTTTTCCAGTGAAATTCTCTGCATTTCTCTTGTCCATAAAGCAATGGGA
>DN99977_c0_g1_i1	len=363 path=[0:0-362]
TATTTTCTGCAACAGATGTTATCCACACATTCTCATATATACTTATTCCAGCACTATACTATTTCACAAGTACTGGTTGGATTATTAGCAGGAATACACAGGTCTCAGCATCAAAAGCTTTGCCAGTCCTTAAAATAAGTTTGAGGTTCAAGTCCCGAGGGTAGCATCTTCACAACTTGCATCTGTCCAGTCCAGTCCTGAAATGGCTAAACTTCAATACTTTCTTCGGTTGTGGGTCATATTTCTTTTTGGGTCATAGTTTTAAACAGCAAAACTTCACTGCTTTGCTCTCCTAAGTCCTGTACTAAACAGCATGACTTTCTTGGGTCATATTTGTTTTTGGTTTATTAGTTTTAAACAGCG
>DN99924_c0_g1_i1	len=250 path=[0:0-249]
GTGTTGGATCAACGAATGACTACTTCTCTGCCAGTGCTGTCATGGTTTGGTGTGTTCGGTTTTTGTTCGAGGGCTGAGTCTGACTGCCCAATGATTGTCGGCTACCCACAAATCTCCTTTTTTCCCTCTTTTCGACACCAGGTGTAGTTGCAGGCTAGGCTATTGATAGTTGAGCCCTGTTGCCCACTAACTTTTGTCACTTGCCTAAAAACATTTTGGCCCCTTCTTCGAAAAGAAAAAATAATTGCTT
>DN99936_c0_g1_i1	len=449 path=[0:0-448]
TATTCTCTTTCTTCCACAATTGTGCTTGGTTACACAACCTTACAAGCTCCTTAAAGGGGGAATGTTCTACCAAATATGGTGATCAAAACCTTTTAGTAGGGAATATAATAAAGAAGAGGAGAGGTGGGTTTGAATCAAGCAAACCCCTTATGTTTTCCAGTTTGACAAAGTCACGCCATCCTAAACAAATGCAAGTTACTTTTCACATTATAATAAAAATATTTTCATTGTCTCTCTTAAAGTTTCAATTGATATTTTTTTTAAATGTTCCATCGTGGGAGAAGAATTATTATAAAAGGCTCCACCATAAATCTTCTTAATCTGAATGTGATAAAGTGGGGTTTTTTTGTTTGTTATTAAATTTTGATATAAAGTCTGAGTTATCGTAGAAGGGGAGCT…
>DN99930_c0_g1_i1	len=492 path=[0:0-491]
ATACATATGTAAATATAAACTTTTTGGAATTTCATTCACATGACCATACCTATGTCATAATCCACATAGATGAAACATATTATAATTATGTTTGAAGCCCAAGATACAAATACATGTGCCACTTATACCACAGAGAAAAAAGAATCAATAAGTGTGTTACATATTCTACATATACCAGCTTTTCACCACATAATAACATAGACTAACAACTATTGCACCACATAACATGTCTTGAATGCATGTAGAGAAGCCATCTCCATTGATGAAGCATCCAATCAACATGGGTAGCAGTGTGATGGGTTTTCTCATTGATGCTAGGCCAATATGACTTGACAAATTGATAATTTCCATGTACAATAACAATGATCAAAACACCAATTTTGTAGAATGATAATATAA…
>DN99966_c0_g1_i1	len=441 path=[0:0-440]
TATCCATGAAGTGCTCAACATAGAAGACCATCCTTAGATGTAACCTACCCTGGTGGTTTATCCAAGTGACACACAAACTTTTTGTAGATATTATCTTTGATGATCCTGTTCATCTCTTGTCTGGTAGGTAAGAGGTGGCCAGGTGCAACAAAGGTGTATCTAAATAGAGGAAACTGGTCCATGATAATGCCAACAGATGCCAGGAGATCTGAGACCCCTGCATACCAGCAATGAGAGATACCTGGGGGATTGGCTAATGCGATTGACTCTGATGAGCAGTAGGCCAAGTATGGATACTGGTCCTGTTCTTTCACTGAGTCAATGAAATTCTGAATGTGGTGCAGGAGTGAGATAAGCAGTGCAAAATGATTGGAATGTAGTTTGAAGGCTATAATCTCT…
>DN99981_c0_g1_i1	len=213 path=[0:0-212]
GGCAAGCAGACACCTACAAAAATAGGGAAGTATACAAAAAACATTTCCTCACATTTGAGTTGAAACATTTCTGAAGCCATTCTGGGGCTATTCCTGGGCCGTACCTGTTTTGGAAATGTTTTAGTGTTCACAGAGGGTAAATGGACCCATGTGTTGCATCTTCGGTAATGGAGCGTTCTAATAATATTAATAAGAAAAAAACAGTTTAAGACA
>DN99980_c0_g1_i1	len=245 path=[0:0-244]
TCTATACTGCTCTAGTTGTCCGAGGTCTTGAATGTGACTGCACCTAATACCCAATTGAGGTGCAGTCAAGCTCTAGATTTGGACCTACTCCTTCATGTGAGTTCAGAGAGAGAGGAATGCGAGATTGTTACTTCAATTGTTGATGACCTTGGATAAGTTTTGTTGTTCCTTCATTGCAGATACCCTCGTATCTTGATTGCGGCTTCAGGCTTTCACTGCGGCTCCATGTCTAGATTGCGGCCTCG
>DN99973_c0_g1_i1	len=274 path=[0:0-273]
ACGCAATCGCAGTGCATAATTATAGGCAAATATGACTCGTTTTTACAAGCACAATCAACGAAAACGTTTGAGTACAATCCTCATGGCAAAAACCATACTAAAATTTATGATGAATGATTACTGCCACGCCTATATAACATTGTTGATTCCTTTAGCCCAATAATTCTGTTCTTTCATTCGCCACCAAAAGCATAAAACAGAAATACGCTTCCACAACTGACAATTGTAGAGGTGAAAACTGCACATAATCATCACTAGTGAAGCCTGAAATAGT
>DN99923_c0_g1_i1	len=317 path=[0:0-316]
ATAATAGATCTTAAAAGAGAATTGGAAGTTTGGTTTCCCTGGTTGTTTGGAAGATGAACTAAAAATATTACCCTGGTTGTTTGCAGAGTGAGCTAAAAATGTTAGTACTGCCCACTTCCTTGTTAGAGCCCATTCTTGAAAAAGAATTGTTGTAACTAGTAGAGTCTGGATATTTACAATGTTTCGGTCCAAATATTTACAGGCCTGTAGTATGCATTGTGCAATACACGATTTTTTGACAGGAAAAATAATTCTGCAAGTGATAGTTATCTCCATTGTGATGCAAACACTTGAAGATAACAAAGTAATGAAACAAT
>DN99956_c0_g1_i1	len=205 path=[0:0-204]
GTTTTGTTATCTTATCAATCTTTTTAAGGTTTTGGTGCAAAGGATGATTGATAGTATTGGAGGTTGTGAAAATACGAAGATAGCTCCTTTTGGACCTTGCTGGTTGTTTCTGTACGGTGTGAACTTCAGAAAGAAATGGTTTAATTTTCTCAAAATTAATTTTTTTACTTGAGTGAGCTATCCTGCATTCTTATGATTAAACGAT
>DN99932_c0_g1_i1	len=203 path=[0:0-202]
TGGCGAAATTGCATTGGAATACAGACGGGGACCGCATAATGGCTGCTGAGCATCGCACAAGAGCTGACTAGGACCGCCTCACCAGAACTGAGACCGCGCCACAAAACAACCCAAAAGGCGACCTGAAGACCCAAAAACCATACTACTAAAACCGCAGTAATTTCGGACCGCCTTTGCCTTACGGGCGGTATCCGTATAGTTGA
>DN99979_c0_g1_i1	len=210 path=[0:0-209]
AATGTGGAGGGCAATAATACCCATGTGGAAGGCTATTGGCTGATCATAGAGAGCTTCTAGATGAGATCCAAGGTTGAAAGATTGCAGGAGGAGGAAGGATGTAGATGTAACCATGGTAGTTAGCAAAATACCCTAATAGCTCTTGAAGCGCTGCAGTATAAATCTATTCCTCTTCATTTTTAGCTTAAAGTTAATATTCTTTGTCAATTG
>DN99975_c0_g1_i1	len=316 path=[0:0-315]
GTGACATGAAGAGCAATGATCAAGGCTAAAAAGACCGAGTGTTTTATGATCTTTAGTAGCAAACCAAGATCTCTATTGAGGTAATTTTCTAACGCTATAAGTGTTGGGCATACTTTTCTTTTGCTTTCTGAGGACGAGTTTAAGGAGGAAAGGCTCGTTGACCACGACCGTTAAAACGCTAAACTTTGCCACAAACAAAGGCCAAGTGTAGGCCTGATCTAGCCGCAAAGGAAGGTTGCTTGAGGCCAAAGTTGGGACACTTTTTGAGATTGAGTTTGTGGGTATTACTTGGTTAAATCATCTGCTACAAGATATT
>DN99912_c0_g1_i1	len=286 path=[0:0-285]
GCCAACAAGAAGATAATAACCTCCAATAGAACAAGTTATACATATGGAAAGAAGAGCAAAGAAAAAAATGATATCAAAATCCTAAAATCTATTAAGACCAATTCATCATCAAACCAGAAACCCAAACACCCATTTCTGAATCCATGTCAACATTTCTCTCCCCTCTTCACCATCCCGAGTGACCACTAGGAAGATCACCTCACACTTTAATGTTGCTCCAGTAAATCAAAGCAACAAGAAACCAACAAATATTTAGAGTATTTTAGCTCATAAAGTTGTGAGACCT
>DN5995_c1_g1_i1	len=299 path=[0:0-298]
TAAGATACATCACATCTCAATTTATATTCTAAGTAGGAGCAAAGGATTTCTCATATGAACGTTGGAAGGGATTTCAATTTTCATGAACGTTGGAGGTAATACTTTGTTGTGAATGAAGAAAGAACCATGACTTTAGACTCCCATGTCCCTTATCCAAATGTTATCCTGTATTGTAGGAACCTGATATCTGCTATTGAATTTTCCTGGTTTAGGCTGCTGTTTTTTTTTCATTTTTTTAAATTTCATTTTTTATCATTATGTTTTGAGTGTTCACTGTGTTTAAAAAAAAATTGAAACTG
>DN5995_c0_g1_i1	len=349 path=[0:0-348]
ATAAATTGAGATGTGATGTATCTTGATGAAAATATAAAAAGATGTGAAGATATTATCGAATTATCATTTGGACTGTTTGATCACCCTACAGGAGCAAAATGAAGGAATCTTTTAAGGTTTAGGGCTTCATTCTTGTTGTTTGGTTGATTACAGGTCTACTAGAATAGCATTTGAACGATGGTCTATCCCAAGCTTTCGGCCTTGAACTCTGAAGTTAGAGCTCAATTTTTGTTAGCTCGAATTCCAGAAATAAGAAGTGAATTTCTCTGTTCTCTACTGAAGCACCAAATCAGGGCTTAAGTTTCGTATTACAGGTGGATCACTCTAATTTTCGGTGGCATTAAGGTTA
>DN5955_c0_g1_i1	len=512 path=[0:0-511]
GTTCATTACTAATATTGGCAGATATATTTCAGCAATTGTTTGAGGAATTGAGTAATAATTGATTGATATATGAATGGATATATTACAATGAGCCTCATGACAATATGCATTAATGTTTCTCTTATTTCACTCAAAGGTGTATGTGCGGTTTTACCAGTTGCTTCCCCCTCTAGTCACATATTAGTAGAATGGAAATGAGAGGAGAAAAAAAAAACAAGAAACAGTATTCTATGTTTTCCAGCTACTGTCCTTGCTTGAAGAAAGAGTGGAAGAGATAACTTTTAAAATTAAACCTAGCAGAAAAGTGAATCACAATAAAAAAGTTAAGTTACTAGGATCCAGATATCGATCTGCCTGAGTTTTGATAAGCAGGGATCCAGATACAATGGAGGAAAAGAA…
>DN5946_c0_g1_i1	len=919 path=[0:0-918]
GGTGACTATACTTGCTTGTTGGACCTTCCATTTTCTTTCTTAAAACAATGATTTTTAAGATTATAAAATATTCGCTCTAATCCAATTCAATGCTAGGCATCCTATTCATTTTGCTTCATGTTCGTTGGATATTTAAATTTGCAACAGTAGCTCAGGTATAAAACAATTTTTTACTTTTTTTTGGGTAAACCGTAATTTCATTCATATTTAAACAAAATTACATTTATCATATGCACCAAGAAAGATAGTGCATTGGGTAAATCGTAATTTCATTCATATTTAACAAAATTAAATTTAGCGTATGCACCAAGAAAGTTAGCGCATTCTTCAGGATATTTCCCCATCCTGTAAGGCAAAAGCTGTTAACAGCCCATCATGTGAATACAATAGAACACTAAT…
>DN5902_c0_g1_i1	len=364 path=[0:0-363]
AAACGTCGCTCGTGAAGCATGGCGTTTTTTATGCTTATTTTCTTAGAATTTTGGATTTCCTGAAGTTTATGTTCGGCTCTCCCTAAATTCTAAGTTTCTGGCTTTCCTGAAAGTTTATGTGCGGTGGTCTTGAATTTCGGTTTTTTTGAGGTGGTCTTGAATTTCGGTTCTTTTGAGGTCGAATCTCCCAGGGTGTAGGTTGTTGCTGGTCAGTGGGAAGATAGTTTGCGTGACGTCTAAGCTTGAAGTTGCGTTGCAGTCAGTATTGAGATGGATCCGTCTTCTTAAATTTACATTATATTGTGTATTTCTTGTGACAGATGTGAATGTCGAGTTGTCAGTCTAAATTTCGAGTTGTTTTGAG
>DN5930_c0_g1_i1	len=235 path=[0:0-234]
GGCATACTCTTCTCCACAACTGTGTAAAAACATGGTACCAAAGCCTTGGTGGAGAGAAGCCACGGAAAAGAGTGAAGGAGTTTTGGGACTGATGCGATTAGAAAGGTGATAAGGGGCTGCAATCACAAACACTAAACAAGGGAATTGCTAGTTGATAGAGAAATTACAAGCATTTTTTTTATCTAAGGACGATAACTCACTCAATCATGTGTCCATGAGGAATGGTTGTGACCAT
>DN5988_c0_g1_i1	len=380 path=[0:0-379]
TTGTTGTAATTTTTATTTTTAACATTTAAAATTCTTGAATCATTTTAGTGTTAAATATGATGATTATGATTGCTTGTTATCAATTTCACACCCCCCTATACCCATCACCCTTGTAACATTCCTAACTACTCAACTCTGCTATCATTTCCCAACACACTTTAGCCTATTACCATATTCCTCCTACGATTTTTAAATTTTTTTCCTACACCACCCTTCAAACCTTGTCATTAACTCCTCATTTTTGAATCGGCAAGTTATGAAACGATCGTTTGACCCAAGTTGACTCATGCAACATCTATCCATTATCATCACTCCAACACTCCTTACATGTATATGGCGTTCTCATGATTGTACCTATGCAAACCAATACAGCTCCTCTG
>DN5935_c0_g1_i1	len=203 path=[0:0-19 2:20-112 4:113-202]
GAATTTATTGGAGTAATTTGGATAAGGCCTAGATTCTAAAAATAGTGTTATTCTTCTGGCCTGGATCAAAGATCCCAAAGATTTATGACAATATCATAATGGGTTAAATATCCGGAGATTTATGACAATGGATAAAAAATCCCAAAATTTACCTTTTCTTGAAACCTTATCAGCATTGTTCCTGGCTTAGCCTCTGCATACAT
>DN5935_c0_g1_i2	len=247 path=[1:0-62 2:63-155 3:156-156 4:157-246]
GCAGTAATTTAGATCAGGCCTAGATTCTAAAAATAGTGTTATTCTTCTGGCCGGAGTAATTTAGATAAGGCCTAGATTCTAAAAATAGTGTTATTCTTCTGGCCTGGATCAAAGATCCCAAAGATTTATGACAATATCATAATGGGTTAAATATCCCGGAGATTTATGACAATGGATAAAAAATCCCAAAATTTACCTTTTCTTGAAACCTTATCAGCATTGTTCCTGGCTTAGCCTCTGCATACAT
>DN5956_c0_g1_i1	len=234 path=[0:0-233]
TGAGTTTTCGAGTGTAGCATCTGAGTTTTGGGTGCAACAATCAGTTTTTCTTGTGTCTACCCTACTTTTGTTTGGTAGGAGAAAATTGAAAACACTCCCCTAAAACAGCACAGGCATGGTGCATTGTCAAATTCAAGTATCATTTTGACTAGGATTGGAGCATACAAGCTCAGTACAAGACATAAATACATATATTTTTATTAATGAATGATGATTTTTACATAGAAGGGCCCG
>DN5966_c0_g1_i1	len=202 path=[0:0-201]
ATTAACAGCATTGGCATATACCATATCCACATTACAGTAGAGAATACAAGTTGTGAACAGATACACACTGATTTTCAAACTGATACCGATCTGCTAGAGGGACCTGGATGGCATTTATTGGGACTGGTATGTGTAGCTTTTAATATTTAAATCAGAAATATTTATTCTGATTGACGGAGTATGTTGTATCTGTCGAAATTCG
>DN5915_c0_g1_i1	len=357 path=[0:0-356]
ATCAGGGTTTACGCATTGAATTTTTCATTTTGTGACGGTGAGACTTGCGGTTCTAATGCAAGCGCTGCACTTGTTTGACATCCCCTTGGCCAGGAATACATAGGGGGCCTGACAAGACAAGGGATAATCCCAGAATGACTGCAGAAATTGTCCAAATCGACTCCAAACATTTTATGGTGTTTGATGGATTCAACCCTAGAACATCCTGCTAATGATAAAAGACCAGTAGTAAAAGCTCTCTACATGCTCTGACAGAAAAACGGCCCTTTCGATCCCATAGCACATATTGATCAGGACTCCAGGGTTTTTTCAGTTGGGCTGCATCCCATCATTAACTGAGACTAATTAAATACCCTA
>DN5970_c0_g1_i1	len=267 path=[0:0-266]
GAAACAAACAAAACCCCTCGAGTAGAATGTGAAGCTTCAACAGACATCGTGGTAGGCAGTATCTGCTAATATATATTTTACTCATTTGTTGTCTGAATTGAGTACTGTTGCTAACAGACTGGATTTAAATCTAGCAACTATAAATCAGTGGTTCTATCTAACACATATTTCACGACATGAATATGCAAGAAGGTTTGAACGGATAAATGTGGATGTGTGACTCATTGTTAGTTTGCCGCTCCATATTTTTACTTGCTTCTTACTGCT
>DN5963_c0_g1_i1	len=600 path=[0:0-599]
TATTTTGGCAATTTCTTGTGAGTTTGTTATACTAGGCTAAACACTACTGGCTTATTTTCTTGTTGGTAAAGTATGACTATGCTTTCAGTCCTTATTTTTTACGGCAATCATTTATGCAGAGGCAATTCCTCTCACCAGGTTGTTCTCTTTATCTGTTCTTTCTATATAGTGTACCATTTGTTGAGAGGCAGGTTGATAATAGTTGTCCAGGTTATATGCTTATTGAATGCAATTTGTGCCACGGGCAGTTATGCAATTGTAAACCTTGGATTGGACTGACCAGTCATTTATGTTCTGTATCCATTATTTTAACTGCAAAGTAATAATTTATCTGATGACAGTTCATAATCTGTAGACTACACTAATGTATGGAAGTTCTCGTAAATCCTATATGAGATC…
>DN5949_c0_g1_i1	len=374 path=[0:0-373]
GGACAGCGCAACAGCAGGTACTGTGTCAGAAAAGGAAGGTGGCACTGCCAGCCACTGACTACGGTCTAGGTAGAATGCCAGCACACGGTAAACGTACGAGTGCTGGTGGGAGGCTGTAACAGACTAAATGTGAAAAGTAATCTAACGAGACGGCACAAAAAGTTGCAACGTTCTTGTTCTGTGAAGAACAAAACTAATTTAACACCATGGCGCAGAAGCTTTTCTCGATTCCTGAAGGGACAAGATTTATGGGGTTTTTCTGAAATAAATCCGGCAACGTTCTTCCTTTGTGAGGAATAAAACTAATCTAACATCATGCCACACAAGCTTTTTTCATTTCCGGAAGAGTTAAGATTTATGGGATGTTGCTGGAG
>DN84580_c0_g1_i1	len=259 path=[0:0-258]
GCCTGAACAAACAAAAAATGCAGCAGTTTAAACAGGATTGAGTGAATAATCTTTTAGTCGTTAAACTCCCTTTGAAAGTCTCATATATTTCCTCCGTAAAGCATATAAAGACTAATGAGAAAATAATCACAAGTGGCACCCTTTAAAGTCTCTTTACATTCGGCTTCTATATAAACAGATAATGAAACAAACTAATACTTAGTGACTAACGAAAGTTTTAGCATGCCCAGATCTGGTCATTTCTCTTCTACCTTGTAGA
>DN84549_c0_g1_i1	len=315 path=[0:0-314]
GCGTGATTGGCGGTATACTTATCTCCCTCTTAACGTGGGTAAGGTTTACCTTATTTAACTAACACGAAAATAAAACTCTGGATAGCATGCTCAAGGATTTGAAATTAGAAAGGTAATGTGAATTTGGCAGCACACTTATCTCCCTCTTATTGCGGGTAGTGTTTACCCCATTTAACTAACACAAAAAATAAAACTCTCGATAGCATGCTCAAGGGTTTGTAATTAGAGAGGTAATGTGAGTTTGGCAGTACACTTATCTCCCTCTAAATGTGGGTAGTGTTCACCCTATTTAACTAACACAAAAATAAAACTCTG
>DN84517_c0_g1_i1	len=360 path=[0:0-359]
CGACAAACGTTCTTCCTAGGTAAGCCTCAAATAAAAATCAATCACTCTTGTGTTGTAAAACTATCAATTGAGAACCCACATTCTACCTGTTTAAATCAGAATCCACATCTAATCATCCATGCATTCTATATCCTTAAAGTAGGAATTGAATGGCTCCTTGAACATAGATCACAGTCAAAACATCCTTCCATTCTTTCCATCACCATAATCCAAACAAAACATATTCTTTCTTAAAATATACCTCACAGTCAAAACCCCAAGAGCCCAAATCTTCTGAGCATAACAATCAAAATATCAATTAATTCTTGCTCTGACCATAGATCAAGAACCCACTTTCTCGCTGAGCAATAATAGTCAAAG
>DN84511_c0_g1_i1	len=264 path=[0:0-263]
ACGTGGCTGGATCCAGGTGTAAGTCCTGGTGATTTTGGCAGAAGAGTACCCACTGTTATGATACCTTAGCCGTACAAAAGTGCTCGTGATTAATGTTTCGTTCTTTGAGGTTCATCTTGTCCAACACAATGGATTGTATGTGGTGCCTGATGTATTTGGCCAATTGTGATGCTTCTAAAGTTTAAACGAAGCGGTTAAAAAATCTCATAAATTACAAAAATTCAAACACAAATGCTATCTAGTCGCTGATATTTGAAGTGCTTG
>DN84534_c0_g1_i1	len=251 path=[0:0-250]
GTCGACATTAAATACCTGGGATAGAGAAGGGCTGAATGAAGAGTGTGCAGGATTCTACAGAGATACTCAGTTGCCACTTACCATTTGGAGACTGCAGACCCTTGCGCTTGCTCATTTTGCACACGCTTTATATGTGTGATAGGGAATAGAGTAGGATTCCATAGAGATGAAATCCTGCCCAGCCTCATTTTTTATAAATTGCTTTCTCTTCACGTACTCTATGATTATTTTGAAGTCACCATAGATATTAA
>DN84589_c0_g1_i1	len=250 path=[0:0-249]
GTCATTACTAGATTTGTAGGCAGGTGTTACTCCGAGTTCCATATGTACCTAAATACTCTTCCTGTTCATATAATTGAAGAGTATGGATCCTGCGTGTGTTCCAATTCAAATTTAAACTCCCCTTGTATGTTGATGAGTATTTGAATATTTTAAAGGGCAGCAGGTTGGGGGAGGATAATTTTTGACTCCGGGGAAATTCTGTAGCATCCTATCTGTGGGGTCTGGGTCATGTCATCTGTGGCTCTTGCAG
>DN84533_c0_g1_i1	len=356 path=[0:0-355]
GCTATGACTATCTGACACAGGACACATTGACCACGGCAGCAGGGCACAGGAGCATGTTTTCCCTGTGGTACTTTTACCTGTGCTTGTGGAAACTTGCTAGGACAAGCCATTCAGGTCACCTTTATTTAAAGCCTCCCAAATCTGCTCATTTTGCTTATCCCAGCATCAATTAATTTGAGTAGAAACAGCCATGGCCCATCTTGCTGAAAAACCATTTTTTGCTTCCAACCAACGCATGAGTTAGATTATATGTTGACCCTTTCTTTTTCAACCTCCTATTTTTGAACTTGTCACTCCCGAGGAATCAATAGATTGCTTGGAAGGAGGGTTGGTAGCATGTTGAGTTTCAGCAATAA
>DN84575_c0_g1_i1	len=213 path=[0:0-212]
AAGAATCCCGATGTTCCACTGTGTTGGAATGCATGAAAAGCAACCATTAAATGGTTAAAGTTTTGTCACGTGATAACTGCCAGGGGGTGCCTAAAGAACTGCTTGAAGAAAATAATGGAGACATGCCAATAGTTACATGATGTATTATTTTGACCGACCTAAATTAGTCGATGCCAATTTATGGTAATGAAATTGCCTTCATCAATGACGGAG
>DN84587_c0_g1_i1	len=208 path=[0:0-207]
GCCAAGCTTAAATTGCAATCCAAACAAAGATGTTTTCATCCATGTACAATGGTGTAGGTGAATTTGGTTGTGCACGTATACAATGTAAAGCAAATTATTGCTCTGACCTATTGAACCAATGTTTGACAGTGGTGCCATCAAACTTTCTTACTTTAAGCTTAGGAAGGTTCCAATAGGTATGTGATTCCTCATGGTTTGATTTGGAAAT
>DN84507_c0_g1_i1	len=326 path=[0:0-325]
GGAATATATTGAAGATACATAGATTAATCCAAGTGTTTTTTGACATTTTCCCTGGTCGAGTTTAGCCGGCATTAAATATTTTACAGCATACTTTTAAGCAGAGACAATGATATCGAATTTTTCTATACTCTAGCAACCAAATGCAGACGATTTATGCATTCATAATAAAACGTGCGTGGAAGGCGGTCGACAAGACGATTTATTTACTTACCTTCTTCATATGGCCGCTGTCCAACATAATTACCAGGTGGATCATAGTTGCAGATAACGAAATTCCAACCGTTGGTACATTCTACATTAGCGCAGCCCAGCCTCCGCGTATTTCT
>DN84510_c0_g1_i1	len=308 path=[0:0-307]
GTTAAATTGCTTTAACAGCCTCGGAGAAGCCCCGTTATTTTCCTTCAATCCCGCCTCTCTCTAATGAGAAGGGATTTTGCGGGCCTGTATAAAATATCCATTTCCATTTTTTTCCCTTACTTGGTAAAGACGATCCTACCAAATGTCTGTTACGATTTTGTTTGAATCATAAAATGAGATGCGACCTGCAACAACATTTTGATCCCCTAGTTTATCGTGTATCATATTTTTCACATAAATAATTTCTTTTTCATTAATGTTACCAGAAATCTCATTTACAAGGTTTACAGTTCCAACATTTACCATAA
>DN84598_c0_g1_i1	len=406 path=[0:0-405]
GCACATCATCTCTGCAGCTGACACAACCAACTCGGTATTTCCTCAAAAGTGCTATTCTACAATACCTTGCTGGAATACATAGATAGAAATTATAGAATTATATTGTAGATTTGCTTAACGTGTTCCAAAGTTAAAAGAGAGCAACTATCCCTGACTTTCTCTTCAATCTTTAGAGAAGTGTTTCTGCACAATTGAGAATAATTCTTAAATCAATAACGATTATTAAGTGTGTCGTTATGACATTGATTGAACTTACAGTCCAGAATGACAGAATGAGCAACCCAAAAGTCAACATCACCATAATATGGGTGCCCTTCAATATCTAGATCACACAGAGACTGGTAAGAACCATAGTTGCAGAGGTACCATTCCTGGGAGTTGGGGAACCCATACCTAGCA…
>DN84536_c0_g1_i1	len=235 path=[0:0-234]
TGATAAATTCTTGTTTATGATTAGTTGATCAACTTTGTTCTTGAGGTTTGAGAGCACAACCTCGATCCAGTGAACTAATAGGAGCTTCAGTAAAGGTAAGTACAGAAAAACTTTCACTTAGATTGAAATGGGCGTGTTCAAAGGTGGGCTGGGAAGCATATACATGATGATCCAGTTGTTAGTGGTAAAGTTGGTTGTTTCATTGGTGTGGTTATCTGCTATTGCTGTAGCACAG
>DN84569_c0_g1_i1	len=267 path=[0:0-266]
GTTGTAGAGGCTCATGTCCCCGAGGAGGGGTTGGTTGTAACCATACATCTTTTACGTCAGGAGGAGGAGGGGTTCGGAGTGGTGATTCATCTTTTACATGAGGGGGAGGGATTGGTTCTAGTGGCTCATATTTTATCACATCGAGAGAAGAAGGGGGAGTTGGTTGCATTGATTCAGGGGGAGGAGGAGGTGGCATTGGTTGCAGCGGTTGATCTTTTATCTCAGGAGGCTGAGGATGGATATGTTGCAGCGGTTCCTCTTTTATCT
>DN84519_c0_g1_i1	len=220 path=[0:0-219]
ATGAAAAAGCGAACAGAGTGATTTGTCGTCCATTTTTACTAATCTTTAAAGCAACGATGCCACTTTCACGTTTGAAGCCTTGGCTGTTCAGATTGCTGCTGTATCGACATGAATCGCCTGAGAGATCGTTGGATCCAGGAACCTCTTCGCCGCTATATGACGTTGCATTTCCTTCCTGCCAGACACTCTCACTTAGGGGATACCATTTGGGAAAAACTAG
>DN84532_c0_g1_i1	len=281 path=[0:0-280]
ATGGATGAGCCAGAAGGGTCAAGCCCTCCTCCTGGAGCTGCCGCGAGAGGGCTGAAGGGCTGTATCAGCAGAAACTCTACTGCTTAAAACAGTGGTAAACTGATCCTTATTTTCCCATCTCTGTTATTGTACTTCGTACAATAAATACTATTGGTATGATGATTGTGAATGGAATTGATTGGATTAAGGAGGGTCTATTGCTCTGATCTTAGAGCTCCTATTTTTCATAGGTTTTTTGTCTTACCTAGTAAAGATTTAGTAGGCCATGCTGACTAATGTAA
>DN84562_c0_g1_i1	len=249 path=[0:0-248]
GTGGGTTTAAGTAGCCTTTTTCAATCCAATATGTGAGCTCATTGTTAATTGCTTGTAGCTTTGTGATATGTATGTGTCTATGATGGGCGATGTTTATGGGGTCCTTGATTGTATGTTAGAGAGTTCAATAAGTCTGAGAAGTGAAAGATCTCGAGTTGTTCAACACCATCAAGGAAATACTTATTATTAGGTGGGACATCTACAATACTTGCATGCTGGCATATGCTTTGAACCCCAAGTACTATGATG
>DN84568_c0_g1_i1	len=447 path=[0:0-446]
GGTATAAAAAAGAACATGGCATTTTCATGTAAATGGTGCACATGGATTAGGTTTGAATGGAAGTTTTAGTCACATCATTTGTTTGAGAAAGATAATTAATTGGTGAATTTATCATATTGGGCCCAACCAACTCAATGCAAGAGATTTGTAGATAATGGATATTTGATGTGTATGAAAATTAGTATGTGATCAAAGATCTAGTTTAACCCCATAAAGCAATGAGGAAAAACAAAATGTTTGTCTTATGAGGAGGAAAAGAGAAAGATGAATTTGGGCATCCCCAATGATGTTGAGTGTGTTTTCAATGACAAGGGTATACATCATTGTATACAAAATAGCTTGTATGGTGTTTCCTCCAAACAGAAGGGGAAAAATTTAGGAGGTGATGATTAAGATGGA…
>DN84566_c0_g1_i1	len=679 path=[0:0-678]
ATGAAGGCTCTCACTTTACTGTTACATCACTCTGTATTTTAGTGAATATGCTTGTGCCTGACTTCCAGGTCTGGTGAAATTTTAGAGTTCATAATCTGCTTATGTATATATACATCTCTGGCAAAGTCTTCTGAGTTTATTGTAATTGCAATCTGTATAATATCATCTGCCCATGCATGACTTACATAATGTACAATATATAGATGTTTCTTGGCAGAACAATAAATTTGAGAAGTCTCATCATGGGAGGGTGAGGGTTAGTTGATGTTGTAATTGTTTAATTTGTTTTGCCTTACTAGTTGTAGGCACAGAAAGTTCCAAACTGATTATATTTCCTCATTTGGTTTCAGATTGGTTCCCTTCTCCACGTCACACTTACTGTGCGTTTACCATTTCGAA…
>DN84540_c0_g1_i1	len=240 path=[0:0-239]
TGTTAAAAAATACATGCTATTGTGGCAGGACAGAAGTTGTTCCTTGAACAAATTTTGGGTAGAAGTGAAAGGCACAATTCAGTTCATCTTGTTGTATACCCTAAGCATTGAAGAAAGTTTATCGATCTCCTTTTAAGGTTAATCCAAAGCATTTTTAAAAGACAAGTATGGGATATTAATGCATGCTTAACAAAAGGATTAATTGACATCCGAATTATGGCAGTTGTAGAAGAAGTATAA
>DN84576_c0_g1_i1	len=315 path=[0:0-314]
TGGTAACTTCTCTCTTGCCTAAAAATGAAATAGATCAACATCATGATGTAGAAAGTTATGATTTGTCTTCTGAATTTGAAGGAAATTTGCAACAGTTTTGTCAGATGTTAAGTCACCAAGAGAAAGAACATGAGAGATAATCAATTTTTTCATCAGCTTATCAAATTTTGAGTTCTAAAATTCAGAACATTGAGGTCATTTTAGATGAAGATGAAGGTGCCATCCATGAAAGCATTAAGCTAAAAAATGACAGATATACTCCACAGTTACAAGAGGACAATGAAGAGAATATTGTTTTATATCCCTTGAATGATG
>DN84546_c0_g1_i1	len=606 path=[0:0-605]
GAAGTTTTGCTTTGAACTTTGGCTTTTCTTGGCTATGCAAAACTGTAAATTCCTTTATTTTTAGTTTGATCCTCTGAACTTAAGGTCAATGAATAAATGAAAAATGTTCTCGCTCGCTCTACTCCTCACTCCTAACCATACAACCTGATATTTTGCTTACACATAAAGGTGGAAGAAAAGAGAAGAGGGTCTTCCAATCTCTGTTGCATATCTTTCTAAAATTTCTATCTATCTGTCCTATTGGTAAAATTGTTTTACAGTTCATCACTAAATAAACTGAAAGACATACAAAACATCAAGAGTTCCAACTTTATCCCCTATTTAGTGTAGATATAAGATGCAAAATATCAAGAGTTCCAACTTTATCCTTCATATGTGAATAGACCCGTTGCTGAGCCT…
>DN84592_c0_g1_i1	len=257 path=[0:0-256]
AAATTCATCATTGTTTGCAGTCAGAGAGGATTTTCAGTCTTCTCACATTCAAGGAATGGATTGACAACAGGTGTGGACATCCTCAAGTTATCCTGATTTTTTTTCTCACACTTGGTTCATCAACAAATATTGAATCACAAACCTAAGACCTTTTCATCTCCCTCGCATCATTATCTTATCATCATCTCGGGTTTTGTTTTGCTTATTACCTCTAATCAATTGCTGGGGTTTTGTACATTACCTCAATTATTATGTTT
>DN84516_c0_g1_i1	len=361 path=[0:0-360]
TGGAGATGGAGGAAGATTGCTCAGTAGGTTAGTGAGAGTGCTTTCACCGAGTTGCATAGGTACAACCGGCTACTAGGGAGTGAGTGTAGCTGACTTCAATGGGGGCGATCTCCAGCTTTTCCGTACGCCTTGCTTGCTTGGCTTGGGGAGAGGGAATTGTATCCGTCACTCGACCGGAGAGGGAGAGGGCTATTAAGGAGATATGCTTTCAATCTCAGGAAATGCAGAAAATGTCTCTGTCTTTTTCATAGGCAAGTGGGGACCTCATGCATAGACGTAGATCCTGAATGATTGCTATTGGGTTGAGGCAGTTATGGAGTCACTCTGGAGGGTCGGTGCCTATTGAATGGAGTCATTGAGA
>DN84525_c0_g1_i1	len=213 path=[0:0-212]
ACCTATGTTTTTGTTTCTTACATTCTGGGTTGCAATGCTGGGTTATGACTCTGCATTTCTGGCCTGTGTTTTTGGGCCGCATTTCAATTTTGGACTTTCTGGGCTGCATTTTATGGCTCAGCAGGTATGTTTTTGGTTCTTTATTATCTTCGTTTTGTATTTGGTGTTTAGTTCATAAACAGTTAATTGTTGGAGTTTATCATTCTCTTTTCA
>DN84504_c0_g1_i1	len=886 path=[0:0-885]
AAGGACCCCCCTCAAAAAAATGAAGTCACGGAAGTTGCGGCTACAAGTTTGTGATCCTCAAAGGAAAAAAAATCATGTCACTATATCACTTTAGCTGCGCCAACAAACAGGCTCCGAATCTATTCTATAGCTCACTTCACCTCTGCGAAGCACCGAACGCTATGGGATCAAGATTCAAGGTTTCTGATACTATACAGATGACGACCTACTCAGTGAAGGAGGAATTTGATTAGGGAGGTAGGCTCCAGACTCCTCAAAAAATACATGAATCCGTCAGAATTCAAGCACGCAGGCTCACCACTCAACACTTCCGCAAACAGGGACCTCTATGAAGTAATGAACAGGCACCTCTGCGTGCAGGGATCCATAACAACTACACTACCTCAAATTGACATTGCT…
>DN84581_c0_g1_i1	len=341 path=[0:0-340]
TCAAAATCTTCTTGATAATGCTGGAAACAAGACATCTAGCGGGAAGAGCCCTTAAAATCACATTACCAAGCCTAAAAGCCGATTAATGGCATGGGGTCATTTCCAAATGATGTCTTAACAAAATATACCATGGGGTTCCTGGTAGATCTCCTTTACAACTCATTTTACCTGCCAATAATACTCCTTGTGAGCATAGATCAGTTAACCCAAAGACACAGTGTGCAAAGCTGCAAACTCCCCACACCCCTAGAGAGAGGCCTCTTTTGCCCCTTGTTTCCCCAAAGAAAGCTTTGTTCTAAAAGAGATGTCTAGCTGTAAGTAGTCTATTTATAATTCTCGAG
>DN84591_c0_g1_i1	len=223 path=[0:0-222]
AGTGTTCCATTGACATTTTTAAGACATATTTCAACAGGGAACATCTCGGTAAGTTTTCATTTTGTATTTGTACCTTGATGAGATTCTTTCATGCTAGTTTGGCAGGTCTCATCACATGATTCCACTTCAAGAAGATAATAAGAGGAACAATACAAAGGTCAACACTAGAGGCAAGCTTCTTCAAGTCCCTAAAACTTGTTTAACTTATCAAAGAAAGGGTAAG
>DN84521_c0_g1_i1	len=201 path=[0:0-200]
AGGAATTAAGCTACGTCCACTTGCACCAAAACTGCTCTACACTCAAGCCATCCCCAGGAAAATACTGTTCTATCAAAACCTTCATGCATTTATATGGAATTTAACGAGGCCTTGTATAACAGTCTAGAGGACTATACATTACAAAATCACTTTCCCAGAATAAACAGATCAATACCAAATATAGATGTCATATTCGTTATA
>DN52159_c0_g2_i1	len=278 path=[0:0-277]
GTGGTGAGTGAAAAGACTGCAACTTTTATTTGTCATTAAAAATTTTTTGTTTGCAACATGAAGGAAACAAGATTTCTATGTGTGACTGTGTAGGGACATAAAAACGAGTGCAATGAAGGTGTACAAAGATGGAAAAGGCGACATAGGACAATGGATGGAGGTAGGGAGGTTCACAAGCCTCATAGACAGATTTCCAACCCTCGGGTCCTCCTCTGAGATTGATTTTGGGTTTTCTATAGTTTCTACAGGATCCTCCTGTAGAAGATACAGAGTTTCCT
>DN52119_c0_g1_i1	len=930 path=[0:0-929]
TGTGTTACTAATGCAAAAACCATTCAGAAAAACAAGCATGTGTCTAGATGCCATACCATGATGTTATGGTGTTTGAAAAAAAGAAGCTTGCCTACAGAAGGCGTATCTTGTATTCTTCATTCTTTAGTATAAACACATGTTCCTAGTTTTTTGTTTTTCCTTCATATGTTCATGTCACTTGTAATTTCTAAAAATGTATACACCAATATATATATAATTTTGCCTTTAAATTCTTCTGGGCTCTTGAGGCTGCTAGGATTTACTCCCTCTCAAAACACAGGCCTGTCATCATTTTGAGAATTATAGTAGGTTGTCATCACTGGTTCTCAAATAAAATAATTCTAATTGCGACATTTTTTATGGTTCTTATTGAAAATATTAATATGAGAACCTGCCTTG…
>DN52114_c0_g1_i1	len=696 path=[1:0-56 2:57-151 4:152-251 5:252-695]
GTTCTATTTTAGGTTGGGCTTTTTGGCTGTAGCTTTTTCCATTTCTATTCATGGTGGTTTAATCAATGTGTATGTTGTGGTTTTAAGCTCTTATTCTTACTAAGTGTATTCTAGCTCAACTTTCAAGATGGAGATATAGAGGAGACTCAAACGTTCTATTTTAGGTTGGGCTTTTTGGCTGTAGCTTTTTCCATTTCTATTCATGGTGGTTTAATCAATATGTATGTCATGGTTTTAAGCTCTTATTCTTACTAAGTGTATTCTAGCTCAACTTTCAAGATGGAGATATAGAGGAGACTCAAACGTTCTATTTTAGGTTGGGCTTTTTGGCTGTAGCTTTTTCCATTTCTATTCATGGTGGTTTCCCCATCTCAGCTCTGCTCTGGTTCAAACTTAGAT…
>DN52114_c0_g1_i3	len=1421 path=[0:0-878 2:879-973 3:974-976 5:977-1420]
AAACATTAAAAGCATGTAAACTCAACCGCAATAAAATTACAATTTTCCCAATTTTATACAAAAATTAACCTAAAATCAATATAAAAATCTACCTGAAGATAGCTAACAAGTCACCCTTATAGCCCACCACATCTAAGCACCATGCACACTGTGGAGCAGAATTTAATAGTGTAGCATGATGCACATGCTAATATTCAATCTATAATATTTATTAGAAACATCAGCTCACTGTGTACAGTAACTTACTGTGGCGGTCTGCACTCTATTTTGAGAAGACAAGCAACTTGATAGTGTATATACAATGATTCCGCCGCAGCAATGCGAGGTGCTTTTGGGGACGATAGGACCTAGATAGCTCGAAAGAAATGTTCCAGCAGATACGAAAGATATGAATGAACA…
>DN52167_c2_g1_i1	len=906 path=[0:0-905]
GTCGAACTTCTCAATTTCAGCAGCGATTTACACCAATAATCTTGCACTCCCCATGCCCTTCTCACCATTAGTAAAATATATCCATACTTTGGGGAATATTGTCATGTAGCAGCGTGAACCCATCAGCGCACATCTGGACGGTCCTTATCCTAACATTTGTTCGTTGCAATTCTCTTATATAATTATGCCATTCTTCTCCCCAATGAGGCTCTATGTGTAGATCCTCAATTGTTTTCCATCCCTGATGCCAATTCGTTGAGAGTTCATCCTTTGCAATCTTATTTAGAGACAGAAAACCTTGGGAGTTTAAGCAATCCATTATCTCCCTATAGAGAGAAAAACCCTCATTACATCCCAACCATTGGTCAATTCCTATTTTGAGCTTTTCTCCATTTCCAA…
>DN52142_c0_g1_i1	len=497 path=[0:0-448 3:449-496]
AAGGGGGAGCTTCCTGACCTTTAAATAGAAAATGTTCCTGGCAATCGAAATGGCCTAGGAGACAAATAGGGGAACCATTTTAAACTTTTTCAAAGCTTTGTTAGTAAACCAGTTCATACAGTCGATTAAAATATTTTCCTGCCACAGTATCTCCACACCTCCTTATGTATCCACAGTGTATGAGTATGAGAAATAGTTTCTCTATTACACTTGCAAAGTGAAAAGAGGCTAGGACCTTGCCATCCTCATTTCTACAGTACCTCCCAGAAACACTTTGTTGGCTAAAGCAAGCCACATGTAAACATGTGTTTTCATCTGACCTTCCAAATGGGCCTTCACCACTAAACATTTCTCACCAATTTCATCACCAAACGTTTCTCTATAACCTGGTCTGGAAGT…
>DN52147_c0_g1_i1	len=889 path=[0:0-888]
ATGGGCACTTTGAACGGACAGGTAGAACTAGCTCTTTTGCCTCCAGACTTCTAGGTTTACTTATTTTTCTTCAAGGAAATCCTCACAGATGCTTTTGTGGGAGTGGACTAATGTCTCCGGGGACTCAAATCCAATGCCAAATGCCTGCAATAACATTGACAACAACCGATGATGCTAACTCCCTGATCTGCAGTTTTGGTTTCACTCTCTATCTACTATTATATGCCTTGCCTGGATTGTATCACAATAATGGAAAAGTATATGAGATGCCTAAGCTCTATAAGCAATTTTGGTGTAAAATTTTTCTTATGAGGTGTAGATTAATTGGTTTATGGGGTTCAGTTTTCATTCAGTTATAGGTTTAAATTTCAAGAGGGGTTATGATGGAAATTACTAGGG…
>DN52137_c0_g1_i1	len=938 path=[0:0-937]
TAACATCAGGCATTTCTAGAAACATACAATGGCTATTTTATGTGCAAAAATTTGCAAGGGCCTTATCTTCTCGTGGAAGGGAAGAGAATGTCATTTTAATAGCCACTTCGTTATGTAGCGTAACATTGCAACTAACATCAGGCATTTCTAGAAACATACAATGGCTATTTTATGTGCAAAAATTTGCAAGGGCCTTATCTTCTCGTGGAAGGGAAGAGAATGTCATTTTAATAGCCACTTTGTAACAGTGCAACTAAAGAGAATGTCTACCTAAAGAGAGTGTCATTTTAATAGGTAGTGTAACATTGCAACTAAGAAGGTCTACAGGGGCTTGGATAGACAGTAATCAGATGCACTGTTAAGGCTGTTAAGGATGAAACCATGATGTTTAATGAAACC…
>DN52165_c0_g2_i1	len=230 path=[0:0-229]
AAAGTCGTGACCAGTGAAGAGTCGAACTCTTGATCAAATTTACAACGGAGTTTAATTTCAAGTAGCATTAGGGTTTGGGATTTCCAAAGATTTCTAACCGCGGATCCCAAGGATTTTAGATTTTAAGCGAGTCCAGAAGAATCGAACCCGCGTCCAATAACTCCCATAACCAAACGTATATCACGACATTCCGTTGCCAAAAGCGACCGCGGATTTTGCAGGGAAGATGA
>DN70791_c0_g1_i1	len=339 path=[0:0-338]
ATCCATAAGGTGGACGTCGGGTGAAAATTTCTCTGAGCTGATTTGCCATCCATGTCGGAGGGAACGCAGGGAAGAAAATCCTCTACCTGTGCTAGAAAGGATTTGACGCATCAGTACCTAGATAATCAACGATAGCCTCTTTTATTGTGTTATATCATGGCTTTCAAAACTGTTATCAATATGGTCTGTAATTTGTTTTGGAGGATTTCTTTACTTATAGGGAAATTATCAATGTCGGGTTACGGATAGCTGACATTTGAGTAGGGTTTCCAGGAATATGAAGCTGAAGTTGTTAATTCTGTTCATGTCTTAGCTTATGTCAAACGTTTTTCAAAGCCG
>DN70758_c0_g1_i1	len=347 path=[0:0-346]
GTGACGATGAGTGGGAACTATAAGTTCCACAATAAGATGTTGAAGAATCCCAAGCTCCAAAGGAAAGATATATGGAGGATCCCACAAATCTAAGAGGAATACCTAGGATAGAGACTGCTAACCTGAAACCAAAAGAACTCGTGATTGGATTGAGGAAAGAAGTAGTTCTTTGAATTCGAGTAAATCGAAGACTATAAGAGAATGAAGGCTGCATACAACAAGTAGAAACGTCATGCATGTCTATGGTGGGACAGTTAACAAGTAGACATATAAAGAAACGACAAGGAAAAGATTAGGGCTTGGGAGAGAATGATTGGCAAGATTAAGGTTAATTTCCAACAAGTGAA
>DN70715_c0_g1_i1	len=270 path=[0:0-269]
TAATGCAGCTGTTGTATCCTTCCAAGAGAACTACAAAGTAGATTTGCTATGTTTAGCAAACCAGTCGCATCATACTCCACTTTTGTTCACTTGTGACCTACAACTGCCTAGAGTCAGGGACGTATAGTAGAAGTCTACTAGAAGCTCTTTCAGTGTCCGTGAGAGGGTGTTTATGTTGACTGGAGACTTGAGGAAGCCTGGTGATGTTGGCCTGATCCGCCAAAGTAGGCTGTGGTCAGCTGTAATCGATGGGTGCAGGTTATATTTGGA
>DN70709_c0_g1_i1	len=277 path=[0:0-276]
ATTCATATTTGCCAAACAACTCAACTAGGCCTCATTGAAGGATCCAAAATGATGTTTTGAAGTCCCTTCTCAAAGGTGAAACAAAAATGTGATGGCCATACCAGTTAAGCAGGGTCTACATTATCCAGCGCCTCAAACCCTGCACTTAGGCTCTGAAACCTAACTAACCATTGGACTTTCATGTAGTAGTTGTTCTGACAGGGATGCCCAATCGTGACTTTAGAGATGATATTCCTGATCTATCTTTCTGCCCATGAAGTGGAAATCTTAACTCAGG
>DN70787_c0_g1_i1	len=512 path=[0:0-511]
GCTTCTGCTCGTATACCATGTTGAAAAAATAAGCAAGATATACAAAATATGATTTTTTTTACTAACGGAGTCATTTAATACAAGTATTTCCCTTTTATGCCATTCCTTAGGTAGTTGTACTACCCATATGACCCACATAACCTAACTACCTCACATTAATGCCACGTAATTAGACTCAAAGTTCACATCCATTTGGTGTGTTGTCCATCCAACTGTGTTGCAAGAGCTAACACAGTTTCTAGGGTGTCCTTGGCTACTAATGCAAAGGTCTTTTCATTGCCAATACCTTTTTACACATAGTCGTTAGCTGCCACTCTTGCTTTGTATTTGTTCATTATGCCATCTGATTTGTACTTGATCTTTACGCCTATCTTCATCTTACTGCCTTGTCTTCACGTA…
>DN70702_c0_g1_i1	len=207 path=[0:0-206]
AAGATTTATTTCCTAGTGTTGACTGGCTTTTCTGAGCTGCTTAGCTGCTCTGTGCCTAATAAAGCAAAACCTTTTAGGGCCTTGTCATATCTAGTGGGATTCAACCTGTTCTTATAATATTGGAAATGAAAAGTCAAGTGAAATTACCCTTTTTTATATTTTGGATGATTCTTTTCATAGCAATTTGTATGGAAGCTGACATGATAG
>DN70738_c0_g1_i1	len=462 path=[0:0-461]
AGTGATATAATTTTTCTTGATTTGAATTTCAAATAAAAAATTATACTAGTTCTAAGTTTAATTTGTTAAAAAGGTGCCATGTCATCCAATTGGTGCATACATGGCTTTGATACAACCATAACGAGTCTAATAGGGAGACATGTTGTGCTTGGTCATGCTAGGTTGACTCGATTGCTTGTTTGTATCACTGGTGAAACGTTACCACTCAACTCTAAAGGAATATGCAATGGTGGTCCCCATACTGGATCATGCCTGAGTTGGCCCTACTTTGTAGTATGCTCATATCACATTCACAATGGATAAGCTTATAAGCTAGAGGGTGATGGGCAATAGTAGGGCTTCACATGGAAACAAGTTGGGTTGACTTAATCCTTGTGAATGTGCTCACTCTAAAGTTAC…
>DN70781_c0_g1_i1	len=404 path=[0:0-403]
GTTGGGGGGCGATTCCATGTGAGTTCAGTTTTGTTTTGCTCGGAAATCATTATGGATTGAATTCTGAGAAAACTGTCAGGGTCATGACTGAAAGGTCGACTGAAAGTAACAAACTTTCTTCTGGTTGCCAGATTCCAGTGATGTAGGAAGTCAGGGTTCCCATCAATCAGGTTTTGCAATCTAATTCTTGAAGATCGTGGTCAGCTCAAAATTGGACAAAACCTTTTGGGACATATTACACCATGCACATAACTTAGATCATACCTGATTTTTTTGCCAGGTTCGTATTGAATTTGTAAACGGAAAGAGGGTCCTTTTGCTACAAGGTTAGCTTACTCCCCTTATAACGAACGCCGAACAACGAACAGCTGGTTCACACAAAATATCAGCCCTTTGAAG…
>DN70760_c0_g1_i1	len=318 path=[0:0-317]
GGAATATATTATAGTTGCATCTATGTGCCTGTAAACATAGACACTGACCACTATTTGAAAATTTACATTCAATTGATTGAACAATTCAGGTTGGTCCAGCTTGTCATTTTTAATCATTGGTCATCTTAGGTTATTGCATGCTCTAGAAACAAGATAGTCTGCCTCTGTTTTAGACTTGTATTCATTTTGTGTACATCAATTTGTTTAACTCACTAGAGCTTTCACTCACTCTAATATGCAACCTTGTATGGTGCCTGAATTGATGGAAACAATTCATTGGGTTTACCTGAATACATGTTTCTGCAAGGAATATTTCCT
>DN70713_c0_g1_i1	len=656 path=[0:0-655]
TTTTAGTGCCCTTTTAAGTCTCTAAACACTGCTTGTTTTATTACGAGTGAGAAAAATCCATGTTCTCTTTCCATTTACAAGGTGAATGGTGCGTACTCCTAGTTCTATTCTATTGTGGCATGTTTCCTTGATATGGTTAGTCAAATTTATTTCCAGACGCTACATTGAAATGATTATGCCGTGTTGTCTGATGGACAAAAGCGTGTGAAGAATATGTAGATTGGATGATTTGCATCAGATTGTGTTGCTATTGTTGTTTGTTCTGTGGTTAATATTTATGATTACATCGAATGCCATGATATTTAATTCTGTTGGTGTTTTATGATGAAGTAATTAAAATTGAATTTTGTGCTTTTTATGCTAAGATAGTTGGTCTGAGGAAACTCTACATCCTGTGCT…
>DN70716_c0_g1_i1	len=407 path=[0:0-406]
CGTCAGAGATGCCCTAACAAAACTACTCTCAAGGGCCTAATTGTTCCAGAATTCAAAGCGTGATCTGTGAAGATCGCCCTTGGTTTACTGAGACAAAAGAGTCACAAGCCTGTGTCAACAGAAGGCTGCTTTGAAGGCCAATTAGATGCTCTGGGAGAGTATGAATGAGCCCAGAAATTGCTTCAGATGTGTCCTGATGATAAGGTCGAATGGCCTCAGATCCTCAATCAGTTCCAAGAAAACTCAAAAAAACTTGCCTCAGATCCATGCCGTTGAGGGTGGTGCCGAAAATTCCAGAGGTAAAGAAGACTTCAGAATGACCTTGAGATGAGATGAGCAGACCTTAAACAGCCTCAATATTTCAGCAAAATCCAACCCATTCATAACATGAAAAATAAA…
>DN70721_c0_g1_i1	len=293 path=[0:0-292]
GTGACATTAAAAGGAAGTGATGATAGGTAGTATAATGTAGCTATATTCCACATTCAAAAATATCATCATGAGTTTGTCGTGATCATTAATGGATATCCGACAAACTTATTCAGGGCCCATAGGGGACTTTGGCAAGGTTGCACCTTATCGCCTTTGTTCTTCTTGCTGGTCATAGATTGTCTCACCCGTAGGATTGGTATTGAAAGGGTCACGGATAAGTTCCTTGGTGTAAAGATTATCAGAAATATTCATATTTCTCATCTAATGTTTGTAGACTACATTTTTTTCGACGG
>DN70723_c0_g1_i1	len=217 path=[0:0-216]
GGTGAATGCTTACAGTTTGATTTGAGTGAAATCGTATTTTTCTACGTTGCACCCATCGATAATACTATTCGTTACAGTTAATGAAAATTGTGTCCACGCAGAGTCCTAAGGCCATTGGAAGGTTATGACAAGAAATCCTTGGATGTTTTTCTCAGGTGTTATTTACTTTTGGTTTCTGCTGGAAATTGTTGGTTCTGTTTATCCGAGAACGTGATAT
>DN70776_c0_g1_i1	len=239 path=[0:0-238]
GTCGGAGTCAACAGCTACATTTCATAGGCCTTTTCCCGAATTTATAATGTAACGACCCAAATAGAGCTAGGAAATGCTCATGCACTCCCACTGTATTACAGAGATTGTACTCTTCTAGTCCCATTTAACATGCTTTTTGCAGTCATTCATCAGACATCAATGAAATTATTTTAGCTTATCCTAGTTTAAATCTCGCTCAGACTCTTTTCATATGTATTGTTGACCAGCCTCCCCTTTAA
>DN70782_c0_g1_i1	len=633 path=[0:0-632]
TTATAGAGATTTAGATCAAAGGAAAAAAAATATGTAATCACATCTGTAGTAAGTTATAACTCTGCGGTATATCAGAGAAAAGTGATATGAAAGGTCCTGGATCATATTTGCTCAGCACTTGATGATGTGCCCAGATCATACCCTGTACCAGGAGCCATCTGCACACCCAATTTTGATGAGGCATTAGTAGTGTAAGTCCTCTCTCTGAATACATGAAAGAAAGAAACTTCATTTATTGAGTTTTTTAAATTGTTGATTTCATCAACTATGACCCTCAAATGAAAGTTCCTCATAGCAGAGACTTGTTATCCGATCAATTAGAACTTTAGAGTCACCTATTACTTGCAATTTCTGATTTTTTTTTTCCACAGCTAATATAAAAACTAGTTTCAAAGCAAT…
>DN70761_c0_g1_i1	len=710 path=[0:0-709]
AATCGTCGTTGCTTACAAATCATCATGTATTTTTGTGCTTCATTCATCTTGTTCTATGAAATTTCAAGTTCTTTGATGTTTTTTTGTAGCGATCTAGGTGGGAATTGATTTGTGGTTTATAGGGATCTGCTTTGCCCAAAAATGAGGAAGGCCTTGGTATGATGGATAAGGTTTCTGAAGGGACTTTTTTGGCAGTGAACTGAGGTTGTGTGGACCATGATTGAGCATGCATGCTGTGATGTAGTTGTTTGTCATTGCATTTAGGATATTGCAAATGCAAATGGGATATCGAGGTCAATGGTTTTTTTAACATGGTGCGGCAAAAAACTTTTAAATTCCCTAGTTCAAGTATTCCGAAGAGGATAAAACAATACTGACAATCAATATCCAAATTTGGAT…
>DN70794_c0_g1_i1	len=263 path=[0:0-262]
GGGCATTGATAGCTTCCTGTGCAAAATGTTAGGGAACTTCTAAGAAGGAAATGTTTGCATGACTTCTCTCTTCAATATTTGGACTACATAGCAAATTACAATTGAGCTAGTGACCTCAGTGAAGCCGCAAAGCTGTTCTTTCAGACACTTGATGGTTCATGGCTTCTCTCCTGGACATTCGGACCCTAAGGCCTAGAACAAGTTAACAGCTGAGGACCTCTGTGAGGCTGAAAAAGCATTTCTTTCAGACAAAAGGGGTGACT
>DN70744_c0_g1_i1	len=217 path=[0:0-216]
TATATTTCAATGGTACGAGGAAGCAAGGAAGGAGAACTTAATGTAGTTTACTAGCAATTGCCTCTGAAGTTGCAAAGGACACTAAGAAAATGCCGGGCGCTAAAATTTAATATTTATTGTGTGGGTTAGAATTCTGCTTAGTTATGTCCATTGAAGGCCCATTGTTTGAAGCAGCTAGTTTTTGGCACTAAATGCAGGGTTTTCATGGTTGGAAGAG
>DN70750_c0_g1_i1	len=218 path=[0:0-217]
TGACCAGAGCAATTCTGGTTGTGCATTTATAGGTTTTGTTAGATTTTCGTTGGGCTATTTTGCCCATTCCTGCAAATTCACTCTCTTCTACGGTTGTGGCACGGGGAGCTACTAGTCGTGATTTTCCCAGAGTATTTCGTTTTTTCTTTTAAATGTCACTGGACGTTAGATTGATCAGAGAACGCTAATCGTAATTTCGGACTGAAAACTTGTCTGGG
>DN70743_c0_g1_i1	len=202 path=[0:0-201]
GCCTGTCAGACAGCCGTGCGACCATCCCAACCAGCCGAAGCAAGTTGAGAACGATCCTCTACAGTTTGGTGCCTCGAACAGAAGCATCAAGGCCGTTAATCACGCTCTGATCGCACGGCCATGGTTCATCCACCAGGTTTGGGGTCCTGTCTCCTTAGTGAGCAAGGATACAGAGGTACGATCCTATAGAACAGATCCTGTA
>DN70790_c0_g1_i1	len=233 path=[0:0-232]
TAAGAGATCCGTTCTATTTTCCAGAGCAAAGGAACGGAGACCCATTCCAAGCCAATCAGAGGAATGAAAATGTTTGGGAGGAGAAATTCAGTGATCCATTCCATTTTTCCCAAGAAGGGAATGAAGGTACAGTCCAACTTGATCAGAGGAATGGAAATGTTAAAACATATGGAGGGATAAATGAAAGCTATTGGCGTGAACTTGTGGGAAATAATAGCGAGAACCTAACTGAA
>DN70718_c0_g1_i1	len=641 path=[0:0-640]
AGAGCTTCCAATCTCAATTGTAGATTAACAAAGTGGCTTCTTTTGCTTCCCTGTTTTGTGTTTTTTATTGGTTCACTTGTTCTTGAAATGTGTTTATCTCCAATATTTCCTTGCATAGCGCATTAGTAGCGAATAGACAGAAATGGCATACTGAATAAAAATATTATTGATGTTTTCCCAGGTGCCATACTGACCAATTCATTTAAATTATAGCTCATACTACATAGAAATGACATGGCTACCTTTTCTGAAACAAAATATTCAAGATGCCAGTATGAAAGCTTCTATTACTAAATGAGCATGGATGTCATATAGGAAGACCAGTTGAAAAAGAGTCTACATGCTGACATTCAAAATTGAACACTTTTTGGACATGGCCTAGGGTTTTTAATTGTTGGC…
>DN70797_c0_g1_i1	len=261 path=[0:0-260]
CCAGATATATCTGTTCAAAGAGCATGGGAGGATGGGGTCTGTTGAACTTCTGGATTTTCGGAAAAGCTCTATTATGCAAGTCTTTATAGAGATGAATTTTCGGTGAGGTCTCTTGGAGCGCCACTATCCAAAATAAATATCTGGGTAGAAAGGATTTCTCATTATGGTTTAGGGAGGGAAGGATTAGCCCCTCTTAGGGCTTGTCAATTTGGCTAAGTCTTCATAAGATGGAAAGATATTTCTTGGGAAACTTAACCTGGG
>DN70708_c0_g1_i1	len=246 path=[0:0-245]
GTGGGTAGCTCAGGGCATTAACTGACTCACTTGAAACAGGACACACAGTAAGAGGCACAAAATGGGCAAGATGTAGTAGCAAGTTATGCAAAAGGCATAAGGCTAAAGAAAGTGGATACAAGGGACTTATGCACAATTTGTTTATGCAGTTCTTTTTTTGTGTCCTTTACAGAGACATCTCTTTTATAAACTCAATGACTCATCCCAACAACATAACCAATAAGGTTTGAGAAAATTAAGGTTTCT
>DN70731_c0_g1_i1	len=484 path=[0:0-483]
GCCAACTTATCGAAGCAACCTATTGCAAGTGGTAGTGGATATCAGTTCTTGATCGTTTTCTTTTTCAAAGCCCTATAATCGAGACACATCCTCAACTCATTAGTATCCTTCTTCTGAAAGAGCACTAGAGCACCAAAAGGAGACCAAGTAGATACTTGTAGACCAAGTTCCTTCGCTATAATTACCTTCATGAAGTTATGCATAGCCCATGAGTCCACAAGTGCTCAGACAATACTCCCCTAGACTCTGAAATCCACAAAACAAAACTTGTGCAACTAGCCATCATATTTCCCTAGAACACCAATTCTCATAGGAACATCAAAATCTACAAACATACCTATCAGCTAACATACCTCCATCTTCTTGAAAGCTCTGATATCTACTCTAATACCACTTGTG…
>DN70706_c0_g1_i1	len=245 path=[0:0-244]
GCAAAGGAGCTCTGTTACAATGTTGCTGTCTGTTCCATGATTGTTGGTGCTAAGGTCTCTACACAGGGCACTGAGGTGCCAGGAGCTATGTAGGCAAGGGCAGACTTGGTAGAGGAGTGAGCATGGTGGTCTCTTTGGGGAACAGGTTGTCATGACCAAAAGTAGGTGATTCTCAAGCACAGACATCTGGAGGGTCAGTTAGGGAAGGGTGCTTAGGTGTGGTGAGGCTCTAAGGTGAAGGTTGG
>DN70705_c0_g1_i1	len=292 path=[0:0-291]
TCCTACATTTTAGAGAGAGAGGTACCTCTTTGTATCAATGCACTTTTGGGTGCATGGAATAGGTAACGAGCATATATCACCACCACTCTTCTGTGTTGAGTGACCTTGAGATCCTTGCACCAGGCCAAAATGAAATAGACAAAGCTGTGGAAACTCTGCTCATACTAAATGCATGGATGCCTTTGACTCCCTCTTGATCTGTGCCTTTGACTCCCTCTTGATTGAAAGTTGATATGATTGTAGATGTAGATATGAATTTGTATTTGGATATGGCCCTTTCCTAAATACCTAG
>DN70755_c0_g1_i1	len=240 path=[0:0-239]
ATGATGTTCTCTCTCCTGCGCATTAGCATTAGTTCTTCTGGTTGGAATTTCACACACTTTATTGGAAATTGATAAGTGAACTAGTGATCACCCTAGGATCTATCCACGACCACTCAAAAGGCAATGAAAGTTGTTTTGAAGTTTAATAATACATGTGGATTTTGGTGGGACTGAAAACTTAAATTTGGTATTAAACTTTTAGCCTAGGCTGAGTTCTTACTTAATAGAGGTGGATTTTGG
>DN70763_c0_g1_i1	len=244 path=[0:0-243]
GTGGCTTTCGGACCCATACCGTTCGCTGCAAGAGCCTGCATTGTGCGTGTGGAGCCAAAGGTACAAGCATTGGCAACGCTCATGACTGCAATGAGAATGACGGCATTGAAGATGGATGGAAGAACCTTAATTCCGGCGAGCTGGATAGCGATCACGAAAGGTGAATGAAGCGAACTGGCGCCAGCGCTACCATTCAGTGCCTCGTTGTTGACCGGTACAACCAGGCCGACCAGAGCAAGGTTAA
>DN70720_c0_g1_i1	len=338 path=[0:0-337]
GCCCTATGTAATTCAAAAATAAGACCCCTGCAACACAGAATCAGACTCCTGCAGCAGCTGCTATGCAAAAAAGCAAACCTTCGTGATAATTTTTTAACAAAATTTATAATGGTTTTGAAAATGCAATTTATGGGCATGCAAATCAGCCATCAAACAGTCCTTTAGGACACATCTCAGCACCCAAGTAGACGTCAGCTATTAAAATTCAAGCCCCTATAACTTAAAACCAAACCCTGTAACTCAACATCAACCCTCTGGAATAAAAACATACCCCTGCAATACAGAATCAGACTTTATGGTAACTACCATTCAAAAATCAAACCTCTGGAACAACTTTT
>DN70777_c0_g1_i1	len=266 path=[0:0-265]
GCACTGGGAGCCAACCCTCCGTTTCTCAGATTAACCTCCACGACGAAATTCGATATCTGGTAGCTTGTAGTGCCTTCATTCGAATGTAAGGCCGGCTAGTTCAATTCTCTTTTTACTTCAAGCGAAACCAAGCCTTCAAGGGAAACACTCGGAGCCAACGGAAAGAAGCCCTACAATGCCAGCCAAAAGCTCGAGTAGACCATGGTGCCTGATCCGAAGAATTCTTGATTTCAGAGAAAAAGAATGCATAAATACCCAAATTTTCT
>DN70767_c0_g1_i1	len=501 path=[0:0-500]
TGAACCATTACCCCACCACCATATCTGCATAATTATTGAATAAAATTATAGACAATATCAGATAGATAATAAGCTTTCTACATTATCTGTAAGAAAGCTCACAGTTGCAAGGCATGCTTAGTTTCTTTTAGGTAGTCAAATATTTGCGTGTCTCTCTATCTATTACCTGGTTCATCAAAGCTTTTCACTACCTCAAAAGGATGCCAGTTTGGTCAAAAGTTAAACTAAGACGTTACTTTTTATCAGTGGTCCAGGCACCTCAAATATATGGCCTTGTTCTGAAATTTCGAATTATGTAGTGACATTTGAAATGATGTACTAAACCTTGAATCTAGCATGTTTGAACTAGAAGTTTCTAATGGCTTTTATCTTATTTGTCTATGTTGTGATTCAGCTTTG…
>DN909_c0_g1_i1	len=383 path=[0:0-382]
TGACAACGAATTTGTAAATAGACAGTACCGAATGTTTAGTTATTTAGGTAAATTGTAAATAAACAGTTACATACCGAATGTTTAGTTATGTAACGGTAGTTAGTGACATGAATATATCGAATGCTCATGTAGAGGTAGGATCATTTTTTGAATAAAGTCCGATTCAATTCAGTGTTGTATCTCTTGGTCATTCTGTTTAGTCTTTCTTCTCTTATTTTTCTGCTGTTCTTTCAACAATTCCCTTGTTGCAAGTACGACCCAGGTTGATTTATATTTTAGATTTGACTAGTGAACATTTGTTATTTCATGCTTTACATACAAGCACAGATGAACATTTTTTGTCTATATTCCTGTATATTATAGTTGGAAAGTGTGAAATATGG
>DN954_c0_g1_i1	len=293 path=[0:0-292]
ATTGCAGCAAAGTTTGTAGCAAATTCTGAAATCTAAATATCTAATCAATATTTTGAACTGTCTTTTTCAGAACTGAACTTTTTAGAATTCTGAAACTTTTTCCAGAATTGAAATTTATGTAATGTTAAATTGGGTTGAGCTTTTTCTTCCGCATCCATCAAATTGATGAGCATTATTTTAAGCATCTGCCAAATCCATCCCATTGACGAAACATCATTTTAAATATCTTTAAAAAATCAAATTTTTTTTCAAAGGAAAAAAACTAGATATATTATATGAGAAATATAAAGTAG
>DN937_c0_g1_i1	len=293 path=[0:0-292]
AGCTGCATATCCATACAAGATAAAGGTAATTGCACATTTTTTTGGTTTCTAGTAAGAACTATCTCTATAAAAGCACCATAATTTTATCATTTTGAATCTATGATGACTATCCAACATTACTTAACTCTTTGAAACATCTATCATTTGAATACATCTTAGATGTAAACCTTCATATATTCTCCACACATTATCGTCATCTTAAAAAATGCTTAAGATATCATCCATTATCCCAAATATGTTACTTGAAATTATTAATAATATCAATAATTATTTATCTCTAGTATGTTCCAATG
>DN989_c0_g1_i1	len=238 path=[0:0-237]
TGAATCAGCAGAGTTACATACTTTTGGTGTTATCATCAAGATGTTAACAACAATTTCAGCGCTTGCCATAACAGAGTCGGTGCATGTCAGAGGTTTTATACTAGTTACAGCTCATGATGGAACCATCACATCCTATATCGCTTGAATCATACCGTATTAAACGAAAACTATAAACATGCATATATGTATATTGGTGTTGTTTTTTGGGTGTAGAAAATTAAAATTGAGTTGTTTGGAG
>DN960_c0_g1_i1	len=430 path=[0:0-429]
GGATAGTTATAGTGTCTTTAAAGAAGAGAAGACTAGACTAAGATTGGGCTTATTGCTCTGTTCCAGAATCGACAGGATTAAAACTGGAACTCTGGACCACCTGTCTCAATATACAAGAAAAAATTGGCCTCTCTCTGTAAAGAGAAGAACAGAGGAAACCAAATCGGTACTTTACAGCAAAGTTTCCACAATACATACAGAGTCTATAACTTGTATGCAGTGCCAAACCCTCTAAAATGAAGTAGTTCAAATGAATAGTCATCACCAATCCAGTGGACATCACTGAAAAATATGAATCTCCAGGTAATCCAAATGAAATCCCCATTGTGGCACATGTAGATCTGCAGCTCCAGAATAAATGCCAGATGGTCTCAACTGGGCTGTGCAATGAGGGAAAGA…
>DN984_c0_g1_i1	len=695 path=[0:0-694]
AAAAAGAACATGCAATGGACACCCATATGCCATACAACCGAAAAAATAAGTTGTGTTTCGTTCCGACTTGGTAAATATACTGAGCAATTAGTAGTAAAATATCTTTTAGTTATCAGTACTTTTAATTTGACGCACTTAGTAATATTAGTTCATAGATGAATACAGGAGAAATCCAGGAGGTACAGGATATAAGATGACTGTGTAACAGTAGTCTTAAGTGGCAAGGAAAGCGTAATGTTTAGACACTAACACCACATACAAGGCAATTTATATCACCTCCCCTAAATTGAAGTCTGAGTGACAACAGCACCATATAACCAAATATGAAATCGATTATAAGAATGCTTCCTTGCTCAAGAAACAGATGTTACAAGAATCCCCTTTTCATCCTTACTGATC…
>DN914_c0_g1_i1	len=251 path=[0:0-250]
TCCTACCTTGCCACCCCCCTGCACCACCTTCCTTTTTAATAGGGATTAGACTGCATCTTGCACCACTTGCCTTAAGGTATTGCTTCCCTCATTCCCTCTTCAGGTCATTGGACACAATCACAGCCAAATATGAGATATTTTCCTTGATCCTCGTGGAAATGGCCCTTGACTCCTACATGCTCTCTACTCATTGGGATATCCTCTTAACCAATAGAATTCTTATTCACCTTTCATAGATTATCAGAATATGG
>DN963_c0_g1_i1	len=608 path=[0:0-607]
AACAATAGTTAAGCATCAGTAAGAGATGGATCACTTTACAATTACGAACATCTCTCTAGAAGAAGCAGTACATCGATCTTTATCATAGTCTTCTAAACTGTTTTCTGAAATAAGTTATATTAAGACTTTTATAATCTAATCGTCCAAGCTGTGCTGAGTCTATCTAGAAGGGCTCTGAAATTAGAACGCTTGCCACAACTTTCCTGGGAACTGAAGTAAGAAATCGAGAGACAGAGATGTGGGAGTACTGACATTCAGACTATTAGAACTGGAACTGTCGGGAGAATAGAAATATGAAACCAGTGAATCGGCAGGAGATGTCTGGATTTCATGGTCGAATTGGTTAGCAGAGATTGGCGAATACCAGCAGGATAAGCCAGGATTAATATGATCCTCACT…
>DN980_c0_g1_i1	len=565 path=[0:0-564]
TCAATTTTGACAGATGGATTTTGCCTCTGTCTGCTTTAGCACCCCAAATAAAGTTGGAGGAGATCCTGTTCATGGCATGGATAATACTGGCCGGGAGGAGATAAAGATGGGCCCAGTAAACCGCCATTTGCATCAAGAAAGATTGGGTGAGGACGACTCTACCTCCCAACAATAAAGATCTATGTTCCCGTATCGAAATCTTGCTAAAAAATCTCTCAACTAGCCATCTCCAATCATTCTTTGAATAAGCCTTAGCTTTGAGGCGGAATCCCAGATACTTGATTCCATTAGACAAAGATCTTGTTTCTATCCCGAAGAGCTGTGAAATCCATAAGGTCATGTCCCAGTCGGTATCATTGTGATACAAAACCGATTTGGCCTTGTTAATAACAAGCCCAG…
>DN993_c0_g1_i1	len=242 path=[0:0-241]
ACAGAAAAATGCACTACTGGAACCTGTAACTTGACCCCACCACTGGGAAAATCAGCCCAAGGAATTCCGCCTACCAGAAAATCAACTTCCTGAAGAATTCGGCCCTGTAAAAACTCAGCCCCCCGGCACCAGCAAATCAGCCCTCTCTTTTCCTCCCCGTACAACCCTTGTGCACTCAAGGAAATCGGCCTCCTAGAATTACACCCGAAATTTCCCTGCACTCTTCCTCCCTTCTCTTCAGT
>DN967_c0_g1_i1	len=331 path=[0:0-330]
AAAAAATAGATTAGATTTGGTAGATACGTTAAAACTTTGAAGTCAACATCTATATCAATATTTCAATATTACAGTTAGAACTCTTTTTGTGTTTTTTGTTTTCCGTTTTTGGAAGTTAGCTAGGTCGTTAGTTCCTAACATGTGTGAAACTGTGGTTACATGGGGTAGATCCAGTGACTTCCCTAAAGTTTGCATTTGTTTCTGTTTATTTGGGTAAGTATTTAATACTATGCTTTACAAATGAACCGACCTTCATTTAGCTGTTCTTTTTCAGGGTAGAACTAAACAAGTGAGTAAACAATTGTTCTAAGATGCAAATTAGACAGTCAGT
>DN941_c0_g1_i1	len=264 path=[0:0-263]
TGGCCTTTTGAGCTTTTATTAACTGCATCCACGCTCTCAATAATTACGCGTATCTAGTTATTAACTATTAGTTATGGCTGTGCCAGCGCTTGACACTGACGCCGTCAGCTGGAAAACGAGGGCAAGACTTCTCGGAAAGTTTTAGTGACAGAAATACGGTAATGAAGTCACATGCATGCTCATGGTACTTATGCAAGAATCTATGTGTTTCGTCTTTATGGAGAGATTCAGAAGATGCAAGAATCCATGTGTTTCGTCTGTATG
>DN925_c0_g1_i1	len=294 path=[0:0-293]
TGCTACACTAACTATGCAGAGTGCATTGATACGCCAATGGTAATGAGCAGAAGCAACAGTAGTGTTGATTTCAATCGCAGTCCTGCACCGTCAATTATGCCATGCTCTGTTTGGCTAAGAAATTGGACTCTCTGGAGTTACAAATTTGAGGGTTTGATATCCATGATAACGTAAATTTGGACTAAGCTATCGACTCCTTGCTTGTTGATTGCTATCACTTGAAAACTGTACAGGAAAACAAGTTGCTGACTCCTTGCTTTTTTATTGCTACACTGACTATGCAGAGTGCATTGA
>DN903_c0_g1_i1	len=415 path=[0:0-414]
GTTCAGAGAAGGAAAATAAGTTTTTTGTGAAAAAGGAAACGTTGCTGATAGACCACGGGATAGTATTCAATCGTTGGAATAAGGAAAGGGGAACTGTGCTGCCGATAGATCATGGATAACATTCAATTCATGGGTGCTTTGCGTTGAAGTTTAAAAAATGGGGAACGTTTTTAGTGAATGGAATAGTAAACATGTAGAGTGTGGTTGAAAAATTGTAATTTAGTTAGTTTTTTGGGGTTTAGATTTTATGGAGTTTCAAATTTCAAGAGAGGTTTATGGTGGATACTATCTTTCGCAAAATATCAAATTCAAATTTCAAGAGAGGTTGAGAGTAGATATTATCTTTGACAAAATATCAAATTCAAATCTCAAGAGAGGTTGAGAGTGGATGTTATCTCT…
>DN983_c0_g1_i1	len=242 path=[0:0-241]
AAAATGAGGTGCTCCTTTGATTCAACCTCCTGCAAGTGATGCAACAGAAAAAACCTCTCCCATCAGGGGATATGATGATTTGTCTCAATCCGACACTAGTGGGAACACACTTTCAACTGGCCAAGAGGGAGCCTGAGGCCATGCATCCAATGTCCCCATGCAAACACAGGTATGACAATAAGACCATCACTCAGCTGCATGAAGCTCAACGTAGGTCATCTTAGGATTGAGGCCCTCAAGGG
>DN74174_c0_g1_i1	len=233 path=[0:0-232]
TAATAGAGAAATGGCTTCAAAAGCTTACAAGATTGTTGCTATCATATAATGTTTTTTCAGAGGGAAGTGGTTTATACACAGAATATGGTTTTGCCCAAATTTTGGAAATAATTCTTCCAAGCAAGGTTCAATTAATCTCATTTTCATGGTGGCAGCAGTGAATGTTATGCTTATTATGCCTTGGATTGTTTGGGTCAACTCCCTCTCTGATATACAGCTTTGTCATGTGCATG
>DN74145_c0_g1_i1	len=348 path=[0:0-347]
AGGTTGTAGGTTAGTAGCATCTTCAACGAAGGAGAGAGGAGATGTTAGGGCTTTTCTTTTCACTATTTGAACGGCATGTCAACCTTGCACCATGGTCACATAGGAGAAGAGTATTTGGGGGTTGTTTTGGTGTGTTTGTGGGACAATCTTATGTGGGAAAGACATCAGAATCAGGCCGCACTTCAAAAGGAAGCTACAAGAGGGGCTAAGGGTCTGTACTAACCTAGACCAAGGGACCGAGAGGCTTAATTAAGGTGCAAACATGTCTTAAGGGCTAGCAAAGGGTGGAGAAAGCCACATAGAGAATAGTCGCAGCGGTAAGGAGTACTTCTAGGCAGAGGATAAGGG
>DN74178_c0_g1_i1	len=330 path=[0:0-329]
TGAATTCAAAATGCAAAAAAAATGATGGATATAGTGACCAATAAAAGGCTTACAAGTTGTTGCATGTTATCTCTAACAAACTAACTGTCCGTAGGGGTGTTATTTTGGATGAAATTAATGTTTGTTTCAAGCTGTTTCAAATCTAAAATCCAATGTAATCACTGGTTTAAGGCTGAAAAACGAGCAGAGTTGCAAGAGGAAGAATTGCAGATTAAGGGGCAGACAAAGGGAGATGATGTGAAAGAAGCACAAGAGGGTAAGACTTAATGAGCTACTATACCCCCTTGGAGGATGTGAAGCTAGATGAGCTTCCTTCACCCAGAGAGGAAA
>DN74191_c0_g1_i1	len=299 path=[0:0-298]
GCCCAGGATTGCCTTCCCATTCTGCAACAATCCATTATAATTAGCTACTGCAACAATATTATTCTGTTGGTGATTTTTCTATCAATGCTTAGTAACATAGCATGTTCACACAGGATTATTTTTCCAATACAATCACAAAAAGCACTGTTTTTAGACACTATTTTCCTGCAGTCACCATAATGGTATTCCAACCAGAGAACATTAAAATTTTCTAACTATTAATTGGACATTTGTCAGAGTTAGGCATTGGTGACTTTCCCCACCAATTTTAAATTACCAGACAAAACAATTTTAAGATA
>DN74180_c0_g1_i1	len=230 path=[0:0-229]
GTCGTCATTTACTTGTCTGGGTTAAGGTTTGCCAAAATGAATCTGTTGTCATTTACTCTTCTTTCTCTGTCCAGAGCTGTTTGAAGGCTGTTTCAGTTCTGCAAAGTAGGGTTTCAGCACCGATTCAGGACAGCCACAGATTTCTAAGGGTTTTACCCTATATATCACTAGCATCCTCCTTTCATGGCATTTTTTTTTGTTCTTTTAGAGAATATCAAGGACATATTTTT
>DN74177_c0_g1_i1	len=268 path=[0:0-267]
AGCAAATTAATCTTCGTCATCTTGATGTGTTACTTGCACACCAACATCTGATGTCTGCTCTTTATTCTACAATTGTTTTCCCTGCACCTCGACAGTTTTTCCAGCATTATACCAACAATTTTCATCTGATTTTAACTGAATCAGACTGAAATAAATCTGTTTTTTCACCAACAGTGACATCCCTACTTATATTTTTCTTGTTAGACTCAGTTTCCAACCTCCTCTTCGAAGCCCTTGATTATCCTTGCAAGAGAGATGAAAGAAGGGA
>DN74197_c0_g1_i1	len=283 path=[0:0-282]
ACAAAGATCCATTAAACTCAGAAGCAGGTAGCCTGTGGTTGGACCTTAATGTAGACTGTGAAACACTTGAAAGAGTGTTTTCCACCAACAATCTTGCTGCTGCTTGGTGGTCAATACATGAAGCAGCTCGTCATTGCATCACTGTTCGGCTTCGTACTCATCTCGGTGGACCAACCCAAACATTTGCTGCTTTAGAGCGAATGCTGTTAGATGTAGCACAATTATTACAAGTTGATTCTGGGCAACGTGAATCAAGTAGTGGCACAAGCTCTTTAGGTGTCCA
>DN74181_c0_g1_i1	len=335 path=[0:0-334]
GGGGCAGGATCGTGCTAGGGGGGTGGGGGCGCTCCCCCACAACCCTGCATTCAAAACTAGATAGTGTGGGCAAAATCCAATTTGAATCATTTGCACATATTAGCATGGCCACAAGCCAAACGAGAATATGGAGTAGCGACCTTTGAATGAGTTTTTGAGTCTCTTAAGATTGAATGCTTTTAAGAGCCTTGAAGCCTTGCCTTAAGTTCATGCCCTTCTATGAAGTTCGAAGTGTTAACTTCAAATGATGGTTGTTCTAGCCTTTACTTATTTTTATTTCAAACGATTCCTTCGAAATATATTAATGAGCCCTTTGTGTTTAAAGGTAGATCCTT
>DN74195_c0_g1_i1	len=406 path=[0:0-405]
AGGGCGATTTATGTCTTAATGCTGATTCTGGCTAACTCATCCTTTGTGGACTTTGCTTGCTCTGTTAGCTCATGATGGGAGGTAAGGTCATTAGTGGTTGAACAATTGAACCTGCGCAACACCCCTTTTCATGTTGTTTATTATCTTTTCTGCATATTCTTTTTTCTGATGATTCACTTATTAGTATCTTACAATTAAATAGCCTGTGTAAATCTTGAGATTCAGTGAGAAAAGGCACTGGTAGTAATGTTGCAAACTGCAAAGCTGAATTGATTTTGAAACAGTTTTAATTTTAATTTTATTTTAAATAATATGGCCTCTCCAATTTTATCTTTTAATTTGACCGAGTCAAAATGTTTACATTCAATTTTATTTTTTATTTTTTAAATTTTAATTTGA…
>DN74189_c0_g1_i1	len=556 path=[0:0-555]
GTTGATATGTGGTTAAGAAATTTAATTTGATGATGGTGATGATGGTTAATGTCCATTGAGACCAATTTTGGCCTAATGGACCAAAAGAAAGGTAAGCAATTACTTGGTTTGCTTGAAAAGTTTTAAGAGAAGCATTCCTAAATCACTGCAATTTTGATGAGTTAAAGGGTTAGGAAGGTTGTATTTTGAAATTGTGCCCTAATGTGGCTGTATGTAGGACATTCTAGAGTATTTTTCATCTTGAACCCTCTTAGAATCACAAAGATAACAAATTCACAATATTTTAGGAATTTTCCAAAGCCCTGTTTCACTATGGAGTTTGTGAATACAAGTTCCAACTAAAACCAATGCAGTTATTCCATGCGGCATAATCTTTTTCCCATCCAAATACATCCAGTT…
>DN74168_c0_g1_i1	len=282 path=[0:0-281]
TGGACTAAGACTTTACGATAGGATCATTACAATACCAAATTGCTTTGATGTTTTGTTGACAAATGGTTTAACGTTCTACGCCTCTGTTGCATCAACTTTTAGTCTTTTTCCTCGAGTGGACTTCCCAGAAGACAAGGAAACATTTCCTCTCTTCTTTCCTCTGGGTTGATGGGAAGGCGAAGTAAATGGACAAAAAATAGCTCGTGTTGTCCCATGTGAAAGTGAAGCAGGAGTCGTTCTTGACAAGCAAGGGGGCATCCATTTTCTCTCTTCTTTCCACTC
>DN74150_c0_g1_i1	len=266 path=[0:0-265]
GGGCCACAATGCAGCTAGCCATATGGGATAATGGTCCTGATTTCTTGAGGTGTTCTCAATCTGATTGAACAGAAAATCCAGCCAGTTCAATGGCTATTTTGGATATATGAAATTTGGTTTTAGATATTCTCTTTAGTTCCCACAGTCAATCCTAGAAACCGTTTCCTGCAGGCTGGAAACCCTTTCCCAGTTCCAAAAAATGTCCACTCACTGGAAGCTATTTTGGAAACTGTTCAGTGGTTTCCAGTGGTTTCTAGTCATTTCCT
>DN74117_c0_g1_i1	len=212 path=[0:0-211]
GGGACATGGGGTGGAGTGTTTTACGTGCATGTGGCTCGCAACATAGAGATCGCGATATATGTATCAGCGATCGCATATCGGGGCGGAAAGGGGAAAGACCTTTAAATAGTAACGAAAGCGAAATGGGCATAAGCGATGCGATATATATATGGGAGCGATGCGATGCATTTTCGACCATTGGATGGGCGGGGTGATCTGACGGCTGCTGAGCG
>DN74165_c0_g1_i1	len=568 path=[0:0-567]
GAAACATCCCTTTGCTTGTATTTATTGGTCTTTAATTTTCATGAGATGATTATCAAACTCATACTGCTGTAACGTACTTCTTTCCAATTGTAGTGAATCATCGGGAAGCATTTCTCCAAAACAGACCTATTCTTGTCCAGCCCCATTCATTAAAAGGAATTTTTTTTTTTTTTACTAAAGGTACCCTTGCTAAAAGGACGGGTAACAGAACACTGACTCTAATCAGACCTTGGACATTCTTCATAGAAATTTTCCGAGGATGAAAGAATGAAATTACATTAATATTCACAAGTGACCAAAAATGATGATGGAACTGCTATGTACATAGATGTTAAAGTGGATGCTGCGGAACTTGACAGGCATGAGGCATTTCTTCCCTAGATAATTATTTAAGAATAT…
>DN74109_c0_g1_i1	len=574 path=[0:0-573]
GTGTATACTCATGCTATAGTTGAACTCTCAACCATCCAACACTATTCATTAGAAGTTAATTATTAACATAAGAGTGGGACTTGAAATAGAATAGTTAATGCCCATGCTGTAGTTTAAGTGTTTAACAATTCAACCATTCATCAATTGTCAATATAAGAGTTGAAACATAGCTAGTGATCGCTCATATTATCCACAACTTTACCGTGACAAGGCAATGGCCAGATTCTGAATGTTCAGCCCACATGCTCTTTCATATAAATAAATGTGTAATAAATGCCGTTTCAATTGATTAAGACACACCCAAAACACAAATGGCACAAGGGAAAGATTTTGCAGAGCGAGGCAAAGTAGAGAATGGACGTAGAAAAACACAGGAATCATTTCAAAGAAATTTCTGAC…
>DN74199_c0_g1_i1	len=279 path=[0:0-278]
TGTGCCTTAGGCACTTAGACGTGAACTTGCTATTGAATATTGTGGATGGAAGTGTTATTCTTTAGACATGAACTTGCCACGGAATATTGTGGAAGGAAGTGTTATTCTTGGATGATATAGGCAGAATATTCTGTCAACTTAATTAAGAACATATTGTGCCTTAGGCACTTAGACATGTACTCGATATTGAATATCGTGGATGAAGGTGTTATTCTTGGATGATATTGGCAGAATGTGCATTGGTTAAGTTAACTCACTGTTTGCCTTGTTACACTCATG
>DN74146_c0_g1_i1	len=407 path=[0:0-406]
TAGGTTAGTATTAATGTTGTGATCAATTTTAAACTGCTTTGTTTTAGCTGAAAGTGTCGCTTAGATGAGACGGAAAAGCTAAAAACAATGAATCACAAACTTGGAAAGCACTTTTTTTTCTTTGGTATGGTTGACCATACGATAACTTGGAATGCACTAATCATATCATTGCATATTATTTTTAATTCTCTGGTCTTGTCCTTTACTTATCCTTTAACCTTTTGCCAAGAGGAAATCACTGGGTTTCCATCTTTGATTTGGGTGATTCTACACTACATAGAGCACTCGAGCTTATATGCTCTTATTCTTTAGACGTGTACATTAGTGACAATTTTTTTTTGGGTTTGCGCCATCATTTTTACTACGAGTATCCACATCTAAAAATAAAAAGGTAGATGA…
>DN74113_c0_g1_i1	len=517 path=[0:0-516]
GTGTAGGATATTATGTTGGTTGAGAATCATTAGCAGGTGGAATCCTTACGCAGGTCTTGGGAAACTTAGTACTATAGTAGTTGATGAGAAAAGGTGAAAATTTTGATAATGTTTGCTATATAATTTTTAGCTATTTTTTACTCTAAAACTGTACTAGATTTTGCTTTGTATTTTATGGCTTTGTACTGTAAGATTCCATGATCACTCCCTATGAGGAATTGTATCTAAATGAATTTTTGTCGTTCATGGAAATTGATATACCTCCCTTTTAAAACCACAGATGCTAGTTACATCTATGATCTGGAAATATCTATGATCTGGAAACTAGATTTTTCTATGACAAAAGAGAACTTAACCCATGAGAAGAGACTTTTTTCCTGGGAGTTTGGTTAATACTAT…
>DN74156_c0_g1_i1	len=288 path=[0:0-287]
GTCGAGGGTACGAACAGATATGGTGTGCTCTGCACACCCACGTCATCATGCACGCTATTAAATCTGTAGGATCGGTCTACTTCCTATCCTTTCATATTTACTGAATACGAACTCTCAGCATCCGCGCATCTTAAAAGGGCAAATCAAATTAAAAGCCCGGAAAGAAAAACATCGCCGTGGCACCGAAAGAAAAGCCTTGCGCAAGACGCAAATGGCTTTCCCTCGTTTATTCTATCTTCGTGTGGTCCGCCTCTCGCGGCCAGTTATTTTGCGACTTTCACGAAGTAT
>DN74119_c0_g1_i1	len=248 path=[0:0-247]
TGACAATGTAAAGTAGCTTTATTTTTATTATGAATTATGTCCTAGGTCCCCACCTACCATTTACAAATTCTGTAATATCATTGACTCCATTTACCAATAAATAAATTTGTATCGGTGATGTTTAACTCTACCCCACAACTCCAAAGCAAGGCTTCACACAACTCCAAAGCAAGGGCTCAAATTATGGGAAATTTAGGCTTACCATGGACCTTCTATTCCATTATCCACTAAAAAGGTCAAAGGTTGTG
>DN74170_c0_g1_i1	len=247 path=[0:0-246]
TTCATTCCAATGTACTTCATAACTCCCTTTGGCTCAGAGAGGAACTTCCTTGGTGGATCAGTCAAAGATATATCCATTGATTAAATCAAAATTGCCTTATTTCTAAAGCTCTGCCATATAAGTAATGGCACCATATCTTAGCCAATACAATTATAATCACAACAGTGCAATGCAAGACAAGAACCCTTATTCCATCATACAAGATATTTTCACTGTAGTGTAAGGTATATGGCATTAGAGATTTGGA
>DN74186_c0_g1_i1	len=216 path=[0:0-215]
GACCCAAGCCGCAGCAACCCTTGCAGCACAACATTTCATTAAAACTATTAAATGTGGAGCCAAAGTATGCATGCTTATCCTCTTTGCCTTTTTTTAAGGTCGGGCAATGCCCGTTCCTCTAATTTTGCTGGTAATGTGAGATTGTATAAAGTAATTTTTTTTTTGCACTAATGAAATATAAGGTACATTTGGTTCAAAAAGAAAGAAACAAGGAAA
>DN74120_c0_g1_i1	len=265 path=[0:0-264]
GGAGAAATCTGAAGAGTTCAATGCTCAATTTTATGCAAGCCTCCCAGCGTTGAATTAAAATGTCAAATTGTGGTACTGTATGTGTCATATGGGCTTGGAGTTTTAATTTGCATTCGGAAAGGAGATGGTATTGTTGCAACAAGAGCCAACTTTGCATGTCTCTCACTATCCATGGTGTCAAAGATGTTTGAACCGCCTAGATGCCACAATTGCAAAAAGAATTTAGCCAGCAGAATATTGATTTTGGGGTCGGGTAGAATATTGG
>DN74141_c0_g1_i1	len=592 path=[0:0-591]
TATTGGGACATCCATAGATATGCCACTTTGTGGCCAAGTTATGGAGGCTTTGTAGCTAAGTTGCATGGGAACACATCCCCAGCACCTAGACTCCTAGATGGCCAGAACTGGGGACGTCCCTGTACTGCATAGTACATTCGCCTGTACCAATTCTGGGACGTCCAGGGGAAATCTTCCCCAAATCAAGGCAAAATCTAAATAGAGTAACCCTAAATCCTGTTTTTAAATGCCAGAAACAGTATCGATCTTGCACATCAATATGTTTAGAACTGGCATTTATTTTTCCAGAGCGCGCAAAAATCTGCTGAAAAATAAGGGAAAACAGCCACCTTGCCACAGCTAGTGCAAGCTTCCCTCTCATATGCAATCCCGAGCTGGTAGAGTCATAGGTCTTTCTTT…
>DN74176_c0_g1_i1	len=296 path=[0:0-295]
TGGAAACACTAGTAGCCCCGCATTTGTTAAGGATGAAGATCAGTGAATTTGATCTCAAGATCATCGTCTTTGGATTCTCCTCGTCAAGCCGATTCTGGCAGTATGTGGTAAGCCGTGAAAGCCCTCAAGGATTGGAAGATATCCTTTTTTGAAGATGAAACCCCAAACTCGTGGTCCAAAGCCCCAAAGTCGATGATGTGGCAGATTCTCTTTGGCTCCAACTTTGAATGATGTGGCAGTCAAATTATGTTGTTGTAGGGTTTCAATTTTCAAATCTATTTTGAAATTAAACAAGA
>DN74121_c0_g1_i1	len=206 path=[0:0-205]
GAAGAAGATTGCGTAAGCAGGGTGCACATTTGGAGAAATATTTCAATAAAGAGATAGCTACCCTTTGCAGTAAAACTTTTGTGGGTGTTCAAGAAACAAGTTGTAGGGGAGTTACAAATGGGCCTGTTACTTTCTACCTTATACTCGGTGATAAAATCTTTAATCTACAAGGTAAAGCTCAGGGAACTAATAGGGAAGTTATCATT
>DN74139_c0_g1_i1	len=437 path=[0:0-436]
GGTCAAAGTTGTTGGGACTCGGGATTTTATTGCTAATATTTAGATGGATCAATACAATTGCAAAATTTCAAATATTTTTAGCAAAGATTGAGTAGATTTTATCTAGTATTTCCCAAGTCGGAATCGTACTCTCACTCTCGACTCTCGAGTCTTTGGCTTGGCCAAGTCATTCCCAGGTCCGAGTTGTGCCATTATTCACAAATCCAAGTCATGTGACTTTGGTCTATAGAATGGGGAAAATTACTGCATTCTCCTAAGCTTATTTTATCATTTATGTATGAGGCAAAACCATAGGCAGTTTTAAGTGCACCTACTCCTTTTCCTTTTAATGGGTTTCATCAGCAAGTGTAGAGCGGTCTAATATATGTCTGCTAGGTCCTATACTATAGCACAGGACAA…
>DN74148_c0_g1_i1	len=214 path=[0:0-213]
AATGCTAATACACCTGCTATGCTTGTAGCTAGCAAGGACTAGTCTAGAAATATGGAGAAGGAAAATAGACCGGTAAACTAATGTCTAATAACACCAAAATTTCAAGTATCGAGCCCTTTAACAACTACTTCCAGCTAGCTATAACTTCTCACAGTTAAAATAGTGTTGCTTGTTTTATATATTTTCTAGAGCTACCGCTTTCGCCTTTTCTGTT
>DN74128_c0_g1_i1	len=402 path=[0:0-401]
GTTACAAGCAGTACATCCCCGAGCTTGTCTTCCAAGAAATAGAAAGAATTGAAGTTGTTGTGCACCAGGAACGTAGTTGTACTCCTGCCCACCATGTTCAAGCTGGAACCAGGGACTGGATTCCTAATCTAGGTACCACCAGGCGATCAATGTTTACTGGCATACAAAAATTCTTCTGGGGCACATCCTCACAACAACAACAATGCTCAGCAGGAGAATGCTCACAAGTTGGCAGACTTGGAAGCGAAGTTGGATGGTATGGATCGCAAAATCAACATCCTCCTTAGCAGGTGCAACAATCACCCCTTCCCTGGGAGTGAGGCTGTTCCCCAGCAGACCCCCAAGTCAGACAACTCAGGACAGTAGCTGCTATGCAACTTTAATTTTCAGTTTTCAGTT…
>DN74136_c0_g1_i1	len=366 path=[0:0-365]
TAAACTATTGTCTTGTCCATACACTTTAAAGCCCTAAGTCATCATAATTGAGAATTAAAGGTTAAACCTAATTCTCTTGAGTTTCACTTTGGCTCGCATTACTCAACACACTCTCCACTAACTTCTAATGGTGTTTTTAGTTGCATCAATCACATCCATCATTTCTGTAATATCCCTGAGCATAAGAATTCAATTTCCAAAGGGAAATTAAGTTGTCAAAGCTCTGCATTTAGTTCATATATCAATCTTTCAAGAAAGAATTTGAACATTTGAGTCAGTTTCCTTCACAAAGTCATCTAAAGGCATCTTTTGCAATGGTTACGAGATTTACTTTGAATTGTGGCAAATCAAATCTTACTTGTCAAG
>DN74162_c0_g1_i1	len=358 path=[0:0-357]
GGTGACTGTAACCTTCTCTTTTTATTGCAGCTAGGGCAGACTTGAGACTGCAAATTAGGAACCATTTAGGCAACATATTGTAGCTCTAGAGATCCCCTAGGACTACGGCCAAATCTTGTCATTTACTTCGGCTAGGGTAAGACTTTAGTCCTCCCATTAGGAATGTGGCTTGCTGGGTATAGAAACCTTCTACTTAACTGTGGCTAGGTCGTTAGGGCAGTGTTAAGGCTTCTTTATTAGGGCAACGCTAGGGCTTCATTAGGGCAACGCTAGTGCTTCATTAGGGAAGCGTTAAGAGCTTCATTAGGGAAACATTAGAAGCCCATCTTCATGACTGTGTTAAGCCTTCATCTTCATG
>DN74154_c0_g1_i1	len=289 path=[0:0-288]
GCTAGAAATAGTAATTTTAAAATGAATGTGGCAATTGGCCATGTAAACATTTATGCATGCTTTTACCGATGTTGCACTTTGTTTGCTCTAAATCTTTTGGGCCTTGTCCATTTAGTTTTATGTCCATAATTGGGCCCTTCCAACCAGATTTATTTTTAGGGCTGGGGGGAGGAGTTCAGAGTGGCCGATACTCCAAAAGTTGGCCATAGTGCCATAAGCTACTTTGGAGGATAATGGCACCCAAGAAGGTCCACAAGGTCTTCCACGAGGTAATGAGTCCAATATGCTT
>DN74166_c0_g1_i1	len=344 path=[0:0-343]
TTATAGAAAATGGCAATGTCAAGGGAATTTACAAGTCAATGAATTAGGTGATCATGAGTAAGAGTGTTGTTGAGGAAGGGGTTTGTTTTGAGTCTTGATGCTTAGAATATAAGGGATAAATGGATGGTAGAGAAATTGGTGATGAAGCATGGATTGGTTGGATGGTAGTTGTAGTTGAATACATGTGAATGGGGTTTAATCCCCTAATTCATTATTGGGTCCTCAGTATAGTGTGTTGAGGTAGTAAACACGCCAGTATTGAGTAGCGTTGAAGTGATTCATCTTCGGGAAATTTCTCAATTGATAGAAGAGGTCCATGCTTTCTTGTAAGGGTATTGGTGTTG
>DN74116_c0_g1_i1	len=213 path=[0:0-212]
ATAATAGCTATCCTTTAGAGAAAGGGGGCGTACACCTTGTCTAGTTGAATATTTACTTGTTACTTAACTTTTGTTTTTTTTAATATTTTGTGAAATACAAATCCCAGAGGAACTTGCCCAGCATCCATATAACAATATACTCATTAAGAGCATAATATGTTATTTGTGGAAATTGATCTGGGTAGGAAGAGTAGCACTTCTTTCTCACAACCG
>DN74187_c0_g1_i1	len=366 path=[0:0-365]
GTACGATAAATCATTGTCAGGAAATAAAAACTACAGTGAAACCACTCTAAACAAAAAAATCAATCTTAAATAGAACTAATATATTCATACTGGTCAGAAACAAAGGAGAGAATGTCTGTAAAAACCCAATGAAAATTTGATTATTGAACTCAGATGGTTCAGTGTTACATGGGGAAACATCCCCCAGGGTGGAGGCAGCATGCTCCCCACATTTTCCATACTCCATGGATGTGTGAACACCAGGGGAGACATTTCCCCATGTCCCCTTTTTGGGGAAACTCAAGGAAACACAAGGGGAAATGTTTCCAAATGTGGGGAATGAGTTTCCCCAAAATGGGGCTTCTAGGCATCTCCCCTATAAAGGGG
>DN34741_c0_g1_i1	len=472 path=[0:0-471]
GGTTACTGAAACATTTTTTCCAAAATCAAATGTCCCTATATTGGCTTTCAAGGTTAGCACCAACCTCTTAAGGAGCTAAGCTATTCACAAAAACAGTGCCCCCATTCTCCTACTCTTCATATGACCCTGAATTCCCTCCCTGATTCTGGCCATGAATATTGACGAATTGGTTTTGGTTCTGATCCTGACTATACACGAAGTGGTTCTGGTTCTGGTTTTGGGCATGACTATTGCCAAATTGGTTCTGGTGCTGGTCCTGGGCATGAATATTTTCGAACTGGCTCTGGGTATTTATATTCTCAGAAGGGTTCTGGTTCTGATCATGATCATTATCAAATTGGTTCTGGGTTTGGGAATGATTATTGACAAATTGGTTTTGATTCTGGGCATGAATATTTT…
>DN34797_c0_g1_i2	len=857 path=[0:0-856]
AATTCGTTTTTCAGTTGGGTTTTCGGTATCTTCTAGGTTTAAAGGGTGCATATATGTTTTTCATTTTTTCCTCGAACTCGGTTTTAGTCGTTTTGTTATTATATCCTGCTTCCCATGGCTCCGAAGGAAAGCTAGTTGAGCTATTTTCTTCTTCTCGGCATACAACCCGCCCAACCCTAGGGCATATTCGCAATTTTTACCCATACGCTGTTAATGTGGTTTTTCATTTCGAGAAGAAGAGAACAATGGGCAATAGGTGCGTTCGTAAGGCATTCTCTGCTAGGCATAATTTCCAAGTTACTCATTTGGTCTTTTAGGGACATTAAACCTTTCCCACCTAAATTTTTAATTCTCTGCGAAGATTCACTATCAAATCATTTGGGCTGCTGTATATTTCTG…
>DN34746_c1_g1_i1	len=265 path=[0:0-264]
TATAAATCAGATCCTGGTAATGTTGACAATATCCTTGAGAGTCGAGACAATGTTCAGACTCAGCACCTTCAGTTCTCTGATTTTGTCTCATGTTTATTGTGTACAGGAACTTCGGTCAACTACAAACTTCATATATCACTTAAAGAAAGCAACAAACCTTAACTCAAATATAAAATTCATAGATCATAGATAGCTTCAAGAAAACAGCTAACAGATCCCTAAGAGAGGAGGATCCACTTACAATGGAGATGACTCCAACTCCAAA
>DN34746_c0_g1_i1	len=1092 path=[0:0-252 2:253-1091]
ATTGGTTGGATTGTAAGTTCAGTTCCTAAGGCAAGCTAATCTTCTCTTGGTGAAATTATCCCAATCGATACAATGACCATCACTGATTATCATTTACCTTTTTTATAATCTTGTAGATGGACAAGAACTGTTTGTTATTTACACGGTAAAGTGAGATGAGAACAATTGCCATGAGGTTATTGCGTTTAATATTATATCATTCCTTTATTTGGGGAGGTTACAGATAGTCTTTGGAGTTGGAGTCATCTCCATTTCTTACATGTGAAGAATGAGCAGCAGAAGCAAGCTCATAGTTGAATGCCTAATGCAAACCAAGGGGAGCATATCATTTGGAAATGTTTGAGCCCTGCTCCTAATGCCAATAGCATGGATCTGTTCATAACAACAGAGAGTTGCATC…
>DN34746_c0_g1_i2	len=986 path=[1:0-146 2:147-985]
TACCAGGATCTGATTTATACTGTGAGAGAAGTGCTCTCTCCAGAGACTAAATCAGCGTGTGAAGTGCATTGATCTTCTGATATATTTGGCAAGTAGATGTTGATTTCACCAGACTATAATCTGCAAGTGGATGCTTCGTGTGTGCAGTCTTACATGTGAAGAATGAGCAGCAGAAGCAAGCTCATAGTTGAATGCCTAATGCAAACCAAGGGGAGCATATCATTTGGAAATGTTTGAGCCCTGCTCCTAATGCCAATAGCATGGATCTGTTCATAACAACAGAGAGTTGCATCTTTAACCAGCAAGGTAGGGTGCAATCTTTGAAGAAGAAGGAAGCACCTTTTGAGTTGATGGAGGGAGGATTTTGATGATTGCATTGATATGGGAGAGAAAAGATGA…
>DN34751_c0_g1_i1	len=845 path=[0:0-844]
GACTAATCTAACAATATTTTCAACATGTTCAGACTATGGAGTCTACTATACATGAGGGTTTTTTATTTCAATGGCGTGCGTTGCGGCCATGATGCCGATGCAAGAATATTACAACGAGAGTGAGATGAAACCATAAGAGCACTGACAGCTCAAAACAACAAAATTGGAGATGAGGTAAAATAGGGACAATACAACAGCAATATTCATCATGTTCCATAACTGCAACATAGCAATGGAGAACGCAGTTGAAAGAACCTCCACATTTTGTCTGCTATCAACGTTCGCCCAAATCCAATCCCCAGGAATATTATCTTGTCTGAGAGTATCTTCTTTTGGAATCCCATAAACACCCTCAAACCTAACATTAAAATTGACGCGAACCCTAAAGACAAAACTGTA…
>DN34711_c1_g1_i1	len=410 path=[0:0-409]
GTTGGCGTGTTGAAACTTTTCATCTTGTGGTTTCCAGTTGCCCACTCCAAAATTAGTTTGTGAATCTCCTCCTTCCATACCATATGAACTCTCTTGATGTTTCATCTGCACTCCATCAATATGAACTTTCTTGATTGTTCATCTGAAATATCATCCTACGGTGAAGGGCAAATCTGGACTATCATCCTACGGTAAAGGGCACATTTAATATAACTATTATATATTTATGTGTGATTTTCTTGGCATTCTTGTATGGGCTTTAGCTCAGAGTCTCCACAGCTACAAGCCCTAAGAGTTTCAATTCGGCTCTAGCAAATAACTTATTTGATATAATAAGTGGAAAAAATGAGAGAAAAAAATTGCATATAAGGAGGGTTTGTTCTTACATTGAATGGTAAT…
>DN34750_c0_g1_i1	len=874 path=[0:0-873]
CCCCGCGTCTATATTGGCAAACCATTCAATGTAAGCCAAGCTTAATATTCCCAACAACTACTAAAAGGAACATTAAGATGAACACCATTATAATGCTCAATTCACAATCATGCATGTAATAACAACACCCAAAACACAAACCACAGAAAAAAATCCATCGGATAAAATACCATTTACCGGAGACCGTAGTTTCCAATTTAAACAAAAGTACCCTGTCAACAAGCTCCAACACGATGTCCACTAACGACTTCACATGAATAAAAATACCATTGAATGTAAGTTTTATGAACATTTATATTTCATATTCTCAATAAACAAACTTAGAATATTTAAAGATGGGTTTTTGTAACCACGCTGTATAGCTTAAGATGCAGCCTCCCGTAAAAATTCTCTCTAGTT…
>DN34733_c0_g1_i1	len=241 path=[0:0-240]
ACTAGAAATCGAGAGGGATAAGAAGATCCCCTTTGCAACTGAGGTGGAAGAGCTCGCTCTGCAGATCGTGAAAACTCTGGCCAGCACTACAGGCTCGACCGGGAAGGACCTGAGGAAAAGAATGTTGAGGATTGTCTTCGCCATAAGCAATCTCAGAAACGTTCTTCAGTGCACAGAAAGAGATGATCTGCGAATCCTAGCGATCGAGACGTTAACAAATCTTGCTCACGAACAAAAGGGC
>DN34744_c0_g1_i1	len=654 path=[0:0-653]
GCCCACACTCTTACAAACCCTAGGTAACATAAAACTAATTAACCTATCAAAATAGCTGGAAGGAATGTTAGATATACAAAGTTACAAACATACCCATAACCAAAAATTATGACAGCAAAACTAATATTGCAGCAACCAATCACATCTGTCTATTAGCTCAAAGCAGAAATTACAGTAGCAATCTAGCTCACAGGAAAATCTAAATAACCATCCAAGTGGTCTGCCCTATCTCTTCATTAACGACGAGGAGACAACTAGGGTTAATTGCATGTAATCATCACAAGCAAAGTGCCTAGGTCAACTGTGCCAATTCCTTAACCATAACCACCTAGTGAAGTCTGCACAGCAAGCATGAGTAAGTTTTGTACGAAGTAATAGGACATGGCACCGAAGGGTGCT…
>DN12392_c0_g1_i1	len=705 path=[0:0-704]
TTTCCCTGGTCTAAAATGTGCAGAGGAGCAGTAGAATGATTGGCAGAGCATTTCTTATGCCACCTAAAGTGAGTATACCCTAGTTAGCCTTTTTCATTATTGTGAAATTAAATTTCTCACTGGTTGCTATATATCAAAGTTGTTTAAAAAGCAAATCCCCAGAATTTCCAAATACTCACATCCTGAATTTCTAAAACCTTAGTGACGTAGAACCTTAATTTATAAAACGGATTTCCAAGGTAAAGGTAGCACACAGAATTATGCTTGGCAATTCCCATTGTCAGCTGTCAATGCTGGAAATCTCAGCCTTAATAGGTTTTCTCCCAACCGTGGTATTTATGAATTGTCACAGTCAACTCAGCCTTTTGCATCTTTGCTGAACTGACTGTGCTGGACTTT…
>DN12376_c0_g1_i1	len=535 path=[0:0-534]
TCTGACAACTACGCTACATAAGACCGTTGAAAGGCGCCATTCCACCACTGTCTGTATGCCATTTGTTACTTTCCTCTTCCCTTTTCTATTCGAATCTCATTGTGTCCCAGCGAGGAAGCCTCCATTTCGCACTTGTACAGTGCACGAACAGACGCAACGAACAGTAAGGGTTTATCAGGAATCTTTTCAAGGTTTCCGTGTGACAGGGAAGGAGGCAAGTGGAAGGACCTGATGATCCCCGGGAAATTACACAGCTCTGTTTGATATATTAAAAAAGTACGTGTACGGGGAGAAAATCGGAAGTTTCAAAGGAAAATCCCCGATTTCTTCTGTCTTCTCAGTATGGCCCTCATGAGCGGAAACAAGATAAAGATTCCAGAATTAATTTGCAACCTTTGG…
>DN12356_c0_g1_i1	len=527 path=[0:0-526]
ATTAATGGGTACTGCTGGACAAATGATGTTCTTCCCTGTGCCTGCCCCTTTTCACCCTCTTCAATGATAACTTCTTCTACTTGTGCTTGTGGAGTTACACTTTCAGGCATAAAATATCTATGGTCGGCAAGTAAGATAACTTTGCTGCTGTAACCTCTCCTTTCTACTTGGATGTCCCAAGCTCCCAGATTGTTTTAGCATTTTTAGAACCTGCTTTGGAAACTCTAGCTTGTTCTATAGGAGAGTCACGCCAAAACAAACAAGTCTTTGTTTTCTGACCCTTATAGCATGGACATAAAGATATTTTCTTTTTGTGGTTCTCCTCAATCTCACATTACCTAAGTTTCTAGTGGCACTGGGCTCCTTTATGTCTTCCTGACTTCATCTCTGTTTGTCACT…
>DN12326_c0_g1_i1	len=570 path=[0:0-569]
AAATCTCAAAGTAAGTATGTCTTTTCATAGCCATTTTAATTAATTGAAAAAACGTGATGGTGAATTCTTATTTCCTTGATACCGACAGTTTTATTCACTATTCATTCAAGAAGATCGGCATGAAACCTTGGAGATACCAATAGTTCTGAATTGTATCCAACAATATGAAAAAGCATTTATAAAGGAATTCATTGGCTCTTCCATGGCATCCATCCTCCTTGCCAAGGACTTCAAGTTCCCTTGCAGTTCCAGGAGGAACTGCCGCCCCCTATGGGCATGCCAGTTCTTGATTGGCTTTTGTTTAAGTTGTGCTGCAAAAATAAAGACATTTCAACATGGCTTAGGGCTTCCTTGATTATCCAGTCTCTCCCACAATGTCGCCTCCCCTCGTCTATGTTT…
>DN12359_c0_g1_i1	len=297 path=[0:0-296]
TATATATATATATATATATATATTCTAAAAAAAATTCAAATACCATTCATGCATTTGGATAAACATATGCTATTTTTTTATGTAATTTATAATCTAGAGAGTTGGGTCAAAGAGGAGATAACTGCATAGCTCCATAAACTTATTTGGCTTTATTTTATTCAAGCATGAGAGCTGCGAAAAGACTTAACAGGGCACAGTCTAACTGATTTTCATCGGAATTTGGTGATACAATTTTTAGCGAGATTGTAATTTTTTGTTGTTTAAATTGTATTTTTTAATCTATAAATGGATTCAGTG
>DN12359_c0_g2_i1	len=302 path=[0:0-301]
CACTGAATCCATTTATAGATTAAAAAATACAATTTAAACAACAAAAAATTACAATCTCGCTAAAAATTGTATCACCAAATTCCGATGAAAATCAGTTAGACTGTGCCCTGTTAAGTCTTTTCGCAGCTCTCATGCTTGAATAAAATAAAGCCAAATAAGTTTATGGAGCTATGCAGTTATCTCCTCTTTGACCCAACTCTCTAGATTATAAATTACATAAAAAATAGCATATGTTTATCCAAATGCATGAATGGTATTTGAATTTTTTTTAGAATATATATATATATATATATATATATATA
>DN12304_c0_g1_i1	len=699 path=[0:0-698]
GTCGGGAAAAAAGATCATTATTGGTTTCGATGCAATTGCAGGTGGTGATGAAGTAATTTCCATATCTCTACAGTGACTTTGGGTCTTGCAGCATAGAGGGATCCTATTTTGGGACAGTGTTATTAACAAATGGGAAGGATCCATCCCTATATGGAAGTCTGCGTTGGAGCTGGGCCTCAATGATGAGCTGGTTCTCCAATGAAACCAGATCATTTCGGCAATGAAGAACATAGGTATTTATCGAACAGAACCTGAGGACAAGCTAATATGGAAGGGGTTGAGTGGTAGATCAACTATAGACGTAAAGCATATTTATATCCAACTTCAACTTGCAGAGCATGATCAACTGAATAGCATTTTCCAATCCACATTCTGGAAAACAGGTTGCCCCCTCAAGAC…
>DN12369_c1_g1_i1	len=356 path=[0:0-355]
GGCACAACACTTGCAGCACATCCAAGCTCTTTAACCCAGGGCTCCTCCTCTTAACAGAGCCACCACAAAGTATTGGACAGAGCTTCAATGCTCTGTCAAGACTTAGCAAGAGTATTGATTAGGGTTTTAGTTCAATTTATCGGTTTCCAAGCAAATATTCTTAGTTCAAATCCAACCAGGATGTCTAATGACCACTTAGAAACAATAAAAGCCAAAGAAAGCAAACAAACAAGCAGTCAAAGAGCTAAAAGCAAACACATTGGGTTGTCTCCCTAGTGGAGTCGGCATTTCTGTTTATATGGATTTCCTCTCTGTAGGCAGAGACTCCATCCCACAGGCTTGCCCAACCCCTGTGA
>DN12369_c0_g1_i1	len=333 path=[0:0-332]
TAAAAGGACTATGCTTTTTGCCATATTATTGTATTCTTGCTTGTTTATGATTATATGTTCATGATGATGTAGTGTTGGTAACACTAATGTTGTATAGGGTTGGACCAGTTGGACATTGTGGTCTTTGTTTACAGGTGCATGTCTGTGAGATTGGGAAGAGTACTGGATTAACCAAGGATCAACCTCCAGGGGAAGATGAATCTGTTGTCCTTTATCAATTTATATCAATTAGCATGCATGAATCATTAGGGGTAGGCGTTAGTCACATGTATCTATCTGTCATAGGGCTTGGGCAAGCCTGTGGGATGCAGTCTCTGCCTACAGAGAGGAAAT
>DN12329_c0_g1_i1	len=613 path=[0:0-612]
TAATGATAAAAGTTTTAAATGTTAGCATGGTCGACAAACTATAGAAATTGTGTTTCATAAAAAAACTGATGATAGTGAGGGTTATTGCTGATAGCGACCACCATCAATTAAACCCCAAGTCTATAGGTCAGGCTTGTAGTGTGTTCTTCAACCATATGTAAATGGTTTAGTATGAGCTGTAGGTTTACAGTAAGCACCATGATACTAAAATTCTGCATTTCTACAAATTAGGCTTTTCATTCAAGAGAATACTGTTCATTTGGGAACCCTCAATAGGCTTGTCAATCTGAGCATTAGAAGGCTTAATAACCATCAGCATGGCAGCTTATGTAGGACACTTATGATGCCTCTCAAGGCACAACAAGGTGTTCCTAAATGATTGGTATGGACATGGATGCA…
>DN12337_c0_g1_i1	len=375 path=[0:0-374]
CATCCTATAAAAGAGACAATACATAATTATTTCATCTTTACTTACTCCAAGAAATGTAACTGTGTAATTATTGACATTATACAAAAATATTAAATCAGTGAATGTTCTGCAACAGGAGTTGCAGCAAAAGGGAAATAAGACTTCATTTAGCATGTATTCTGCAAATGCCAAATGATCTTGCATATAGATAGCATTGAGCAAGTGCTAATGATTAAGTTCACACAAGGAAAGATTACATGAGACAGGTCATCAACAATAATCAAAATTTTCACATGAAAATGAAAGCTCAAAGAATGATTATGTCAATTGCAGATCAATTCCAGTATTTAGGAAACTTCAAAGAAAAATTTATTGCATCCTATAAAAGAGACAATA
>DN12377_c0_g1_i1	len=282 path=[0:0-281]
GGACCCAAGAGCTGCAGACCAGTGCCATCTGAAGCATATATAAGTTCCGTACTTCGTAACAAAGAACAAGCCCTTACCTGACAACCTATACCGATCCCTGCCTAGAATTCTAAACTAAGAGGAAAATTTGCATGTATGCCAAAAGCGGAGTTAATTCATTGGTCAGGTCAATGGTTTGTTAAAATGTCAACTAGGGTCCTATTCTTACCCTGGTCTGCCCACGCAAATGCCATGAGCTTCAACCGGGTGTAAGTCAGGGAAAACTTGGGCAGTAATGTAACA
>DN12325_c0_g1_i1	len=296 path=[0:0-295]
CCCTCTGCAAGTCTAGTCCCCTCCTGTTGCAGGCAGCAGTTTACAATATTTAAACCCCATATTTGTTAGCTAACTAGTCGAAAAGGGAATGTTCCAATAATAAAAACAGCAGAATCACCAATATCTAGTAGTTGAAAGACTAACATTGACATTTGTATTTTTTTGTCATTTTCCCACAATTTTGTAATGCACATTAACTGCTAAGAGCAAGGAACGTGTCTGCATTAAACCAGAACAAATGAAAAACACTCACTACAGCTTCACAAAAATCCCAACAAACTGGATGCCGCAAATAA
>DN12305_c0_g1_i1	len=401 path=[0:0-400]
AATATAGTGCAGAACCTAGTGTTGTTCTGTAGAGAAACATTCCTGGTTAAGTCTGCTAGTCATATGCTCCTGTCTGCACTGAGAGAAGCTAGGTGCTCTCTCAGTGCAAACCGGACTGATTACAGGACTAATGATAACAGCAGACTGATTAGATACACACGCAGGATCTTTTGATTGCAAAGAGGTCTGTATTGAATTTTTTTGATTCCTCAAGCTACTTAATAGTGGAATATAGGGAAATGAAACCTTATTTTATATATATATACTCTGGATTTTTTAAGTGTGGAGAGATTTGTACTTAATTATTTACTTAATAGTGGAATATAAGAAAATGAAAACTATATATATATATATATATATACATTGGATCTTTTAAGCGTGGAGAGATTTGTACTTAAT…
>DN12311_c0_g1_i2	len=806 path=[0:0-752 1:753-805]
AACTACATCACACATTCACATCAGACGTGACATGAGTAAGCTAAAGGTTGACAGTCCACCGACTCGAGACAGAATTTTAGAAGACGAGACTCAAACATTAGAAAAATGCTTTAAGTTTAAATTTATATATTGATCCAAAATGAATCCGTTATTACCTCAAACAATTAAAAGCCGGGTGCTCTGTACTTTCCAGAGGATGAATCCAACATGTTTAAGAAGCCAATGAAGACCAAAGACAAAAGGCTTCCTCTTGGCCCCACAACAAGATGAATCGACCAACTATGGAAAGAAATTTGTGTACTTCTAAAAGGATGAATCCAACATTTCAAAAAGGCAATGAAGACCAAAGACCAAAGGCTTCATCTTGGCCCCACAAGAAGATGAATCAACAATGGAAGG…
>DN12311_c0_g1_i3	len=1027 path=[0:0-752 2:753-1026]
AACTACATCACACATTCACATCAGACGTGACATGAGTAAGCTAAAGGTTGACAGTCCACCGACTCGAGACAGAATTTTAGAAGACGAGACTCAAACATTAGAAAAATGCTTTAAGTTTAAATTTATATATTGATCCAAAATGAATCCGTTATTACCTCAAACAATTAAAAGCCGGGTGCTCTGTACTTTCCAGAGGATGAATCCAACATGTTTAAGAAGCCAATGAAGACCAAAGACAAAAGGCTTCCTCTTGGCCCCACAACAAGATGAATCGACCAACTATGGAAAGAAATTTGTGTACTTCTAAAAGGATGAATCCAACATTTCAAAAAGGCAATGAAGACCAAAGACCAAAGGCTTCATCTTGGCCCCACAAGAAGATGAATCAACAATGGAAGG…
>DN12368_c0_g1_i1	len=748 path=[0:0-747]
GTTGAGAGTATCCATAAGTGGTCGAGCATTCTTGATATAAATAAAGTCCATACAGAGCATATAAATCCATGATACTCGCATAGAAGAGTGAAACCCCACTTATTAGGCTAGGGTTTATAAAGAAAGATATTCCTCCATAAATTTATACAGGTTCTAACTTACTACGAATAAACCCTTGAGAATATTTCAAAACCCTTAACCCAGAATAACTGTGTGGAAGTTGAAACCATCAATTCCCTTATAACCCTCAAATAAACCAAGGGATGGTACCCAAGTAGAACCTGAAAAGAAGAAGCCCAGTAGGAGTGGCCGATTTAGTGATTAAATATGTCACAAACAAAGAACATGGAACAGTGTAAGAGGGTAGTATATATCTGCATCCATTAACCTGTTGGAAAT…
>DN12307_c0_g1_i1	len=818 path=[0:0-817]
ATCAAAGCAACATCATATGCATAAACTAGTAACAACAAAGAACTTATTATTATGTGAACTTCATATGCATAACGAGTAATAACAAAAAAAAATTCATTATTATTTGTACTCCACCTTGACATTAGTATTGATTTTGACTTCTTTTTTTAATTTTAGCATTTGAGAACTTAATTTTTCAATAAGTTATTGATTTACAAAGAGAGTAGCTTCCCTCATCAATTTAGCAAAATTTACAAAGTAAAAATATATATCACTACCTTTTCCAAATAAGAGTCACCCATGAGAGATTCAATTAAATTTAAATATTACCACACTTAACATTAATAATGTAGGTTTGACAAATTAAGAAGCCATGGCCACATTGAAGGCAGATGAAATACCAAAAAAATGCATAAAAAT…
>DN12362_c0_g1_i1	len=448 path=[0:0-447]
CTAAACCACCATTATATTAAAATATTTTTTATTTTACTTATTCAAATGTTGTTCAATAATGGACGTGGAAAAACAATCTGTCCACTTACAAGATGTTGAGAAAGGATTGTGCGAGGCTCCATCAAGCCTGATGAAACAATTTCTATACTCCCCCCTCCATCCTAGGCGATGAGATTTTAACCAATAACTTCATAGAGAACTAAACCCATACCAACTGATCCACACCTTATGGGTAAACCAGTTAAATCGATTTTCACAATATTTTGTTGGGACAGTAAGTTGAACTGAACATTAAATGGTGTGTCCTTTCTCTACCTACTCAATTGTAGTGAAAGCGCTGGTCCCTACATCAAACTTTTCACAATCTTTCCTGAAGGCCAGAAGAGTAACGGAACGATA…
>DN12328_c0_g1_i1	len=234 path=[0:0-233]
TACTCTATGTTGGAGACCTTGAATGTTTGGCTGATTGATTTGAATAGAGTGATGATCCAGAAGCAATGTTTACCTTGCACAAGATTCAGTAAAAGTACTGTTCCCTCCCAGACCCAAATTCTGGGGACATTTCAAGCAGAGACTTCATTATTACATATGTCTGCTAGTATTTTTTATGTTGTGAAACATTTTCAATATCTTGGAAAAAAGGTTGTGTTTTTTAATAATTCTGGG
>DN12313_c0_g1_i1	len=835 path=[0:0-834]
TCTTAAATAAAGGTCAAATCTCTTCGATATCTTTAGGGTTAGGTCTTGCTAATTTGATAGACTGACAAATCTCTCTAAGTTAATCTATCCAGATTTTCCAATAGATAAAATGGTCAGTCGGTATCGGTAAACCACTTTTAAATATATATATAGATGGTAAACTTAAACCGTGACTACCCATACCCATGCAATACGGACTTTGGTGGTGTGCGACGACTCATGCAATACCGCCGTTAGTAGTGAGGGACAGACTCCTGATTCGACATCGGAAACCACGCCGAAAAGCATTCTCTGAAACTGAGTGCGTGTGAACACGCTGACTAACCCAACCCAATCTCTTCCATTATTGGTAGGAGGAGTACAGGGCCCTAAAGATGGCCAAAGAATTTTAAGATAAAA…
>DN33490_c0_g1_i1	len=1444 path=[0:0-385 1:386-413 3:414-462 4:463-500 6:501-584 8:585-1443]
AAAAAAAAAAAAAAAAAATCAAAAATTTACTAGTAAAATTAAACAATAAAAATAAAAACAAAAAACAAAAAAATCAAAATAATGGAAAATATTTCAAAAATTTAACATAATTTAAGCCAAAAAAATTAAAGAAACAAATAAAAACACTTTTTTGAAGTTAAAAAAAACAACAACATAATTAAAAAAAATGAAAATAAAAATAAAAACAATAACAAAATGAAATAGAAAATAGAAAAATTAAAATAAAACATCAAAAAAAAATATTATAATACAAATCATTAAAAAAAAATGAAAACGTTACTTATATGTCAAATACCTATAGTTGGTGCGAAGAATTGTATTAAATATCAAAGTTTACACTCATAAGGAGCAATAGCCTTAAAGGCGCTCACGACAATC…
>DN33490_c0_g1_i2	len=722 path=[0:0-385 2:386-413 3:414-462 5:463-500 6:501-584 7:585-721]
AAAAAAAAAAAAAAAAAATCAAAAATTTACTAGTAAAATTAAACAATAAAAATAAAAACAAAAAACAAAAAAATCAAAATAATGGAAAATATTTCAAAAATTTAACATAATTTAAGCCAAAAAAATTAAAGAAACAAATAAAAACACTTTTTTGAAGTTAAAAAAAACAACAACATAATTAAAAAAAATGAAAATAAAAATAAAAACAATAACAAAATGAAATAGAAAATAGAAAAATTAAAATAAAACATCAAAAAAAAATATTATAATACAAATCATTAAAAAAAAATGAAAACGTTACTTATATGTCAAATACCTATAGTTGGTGCGAAGAATTGTATTAAATATCAAAGTTTACACTCATAAGGAGCAATAGCCTTAAAGGCACCCATGACAATC…
>DN33442_c1_g1_i1	len=297 path=[0:0-296]
TGGTATCCCATATGCTAAATATGCCTGCAACAACACATTATTTTCACCAAACAAAATGGACTGAAATGATATGTGTTCAATAAAACATAAAATCCTGCAAATATTTATTATTAATTACTGCAAGCTCAATAATTAATCAACATAATCTAGTTCATTTCAAACCCCAATACATTTTTGTCATTCTTGAAGCAACCATGATAAATGATAGCATCCTAACAAAAGAAAAATGCATTCATGAAATTTATAATCCAAGATGCAGACTACATGCACATACATGCATAACCAAGGCATTATGGA
>DN33486_c0_g1_i1	len=288 path=[0:0-287]
TAGTGAATTGTTTTTGGGTACACCTAGTTCGTTCTATAGATCAAAGTGTTATTACACCAGTGATGATAGACTTAAACAATTGAAATAGTGCCAGAAGTTCATCGATTGTTGCATATAAAAGAAAAGATAAAAAAGTAAAATTTTCCGTGTCCTTGAATGATCAGTACTTGATCTGTGAGATAGGTAAGGAGTCAGGACCAGGACACTGAAGCACATTAATTTGAAAGATGAGTTGCTAATGCTTTTTCACTTTAGCCTATATGGTTCAAATCAAGACGGGTAATTTTA
>DN33469_c0_g1_i1	len=392 path=[0:0-391]
AGGCACAAGATTTGATTGTACGATCTCTGTTCTAAGTTTTCAATTTATTCAACAGATCCTAAAAGTCAAAATCTGCTATTGTAGAGCAAAAGGTCTCACTTCCCTGCATGTTTTTCATTGTAGTCTCAAACAGGACAGCAAGAACTTTTCTGGGCTTGAAGAACTTTTCCCAGGCATACCCACCCCTTCCTCAAGTGAGCATGAATCAAGCAGAAGCAAGAGAAAGAATGATTAAGCACCCACATACTTTCGAAACATTACATTTGAGGCCTTATAATTTTGGGTGATAACAAAACGTTAATCTAACTCTTAATAGTTTTGTGTCATTTTCTCTTTTAGAAACTAGATAATAGCTAGTTCAAGCTCTCTCTCAAATAATATTTTACTTGTCA
>DN33446_c1_g1_i1	len=367 path=[0:0-366]
ATATTATTCTTTAAGATCTGTTAGAATAATTGATAGTTCTTTAAGATATGTTGGAAATAGATGCAGTTAAATACAAATGATGTGTTCTAGTTAATGCCTGAAGACTAGGGTTTTGTTCTGGGAGGGTTTTGATTTTTCTTTTCGCCTCTGGAATTGGCTGGTATTCCCTTTTTCTTTATTTATTTTTCTTCCGGGCATCGATTGATATTATTATTGTCGATTAGATTGCTTTTGAGCAAGATAGATTGTTGCTCGGGTATTAGGGTTTCGTCCTGGGAGGGTTTTGATTTTTTTCGCCTCTGGAATTGTCTGGTATTCCCTTTTTCTTTATTCATTTTTCTTCTGGGCATCGATTGATATTATTATT
>DN33446_c0_g1_i1	len=845 path=[0:0-844]
TGAGCAAGATAGATTGTTGCTCGGATGCCTTGTAGATATTAAAAGAAACAAGCTGTAGCTTGTCAGCTTGTAAACGCCAATTTAGATGCACCCGTAAAGCTTATTGTTTGCAATCCCTCTGCTATGAGTCATGGGCATTCATTTTAAGGCCTCTATCTCCAGAAGATAAGTTATGGCAAACCCGATTACACTTTTAGTTATGTACAATCGCTAAAAGCAACCTGTGGGTTGTGCTCTTCCAACGTCTCTGTATTTTTAGAGTTCATTCCCTTTGTCCCAGCATAGTGGAGGTCAGAATCGTGATCGCGAGACCCCTTTCTCGGTTCTGTTCCGACAGCATAGTTAACTCGCGGATATACATAATATCATATACACGAAGCCCTCTAGCCCATTTTTCGT…
>DN33464_c0_g1_i1	len=1003 path=[0:0-504 1:505-574 2:575-1002]
TTTTTTTTTATTAAGAACACAGGTTTTGCATAACCATTAAAATGTAAAATATTCAACCATTCTTCAGCTAAAGCTAGAGACTGGCATCATTACAAGTTCAAGAAAATGTTTCCAAAAGTACACAACCAACTCAAGTCGAGCCGGCCAAATCTCGAGGATAGAGGACACCTCATAAAACCTCCAAAAATAGGACCACACAACCAGGAGGACCGAAGCCTTTGACTCAACCCTCTTAATAAATAGGAAAATTAATACCGCCACCATGGCAAGAGACTCGTGGTCTCATTAATAATGGATATGTAACAACTAGTTTAAAACAATTAAAGACCCAAAAACCCTGAGTTGAGTAACTCCTGTTCAGCTATCTTTTTTCATACAACCTAATAACTCTTGAATTAG…
>DN33464_c0_g1_i2	len=933 path=[0:0-504 2:505-932]
TTTTTTTTTATTAAGAACACAGGTTTTGCATAACCATTAAAATGTAAAATATTCAACCATTCTTCAGCTAAAGCTAGAGACTGGCATCATTACAAGTTCAAGAAAATGTTTCCAAAAGTACACAACCAACTCAAGTCGAGCCGGCCAAATCTCGAGGATAGAGGACACCTCATAAAACCTCCAAAAATAGGACCACACAACCAGGAGGACCGAAGCCTTTGACTCAACCCTCTTAATAAATAGGAAAATTAATACCGCCACCATGGCAAGAGACTCGTGGTCTCATTAATAATGGATATGTAACAACTAGTTTAAAACAATTAAAGACCCAAAAACCCTGAGTTGAGTAACTCCTGTTCAGCTATCTTTTTTCATACAACCTAATAACTCTTGAATTAG…
>DN33456_c0_g1_i1	len=211 path=[1:0-23 2:24-210]
AATAAGAAATTCTCTGCAGTATAGAGCTATTTTTATCAGACTGATTATAATAGCTAGATATATTGCACATTGGTAACGGGCAAGTGTCATATGTATTTGCTACTATCTCTAGGTTGTGCATTTTCAGTTTTGGGGATGCTTGCTTGGATACATTTTGAAGACTTCAGGTGCACATTCTTGTCAATGCTAGGCTCCATGGAAAGATTCAAAG
>DN33456_c0_g1_i3	len=473 path=[0:0-225 2:226-412 3:413-472]
AGCTATTTTTATCAGACTGATTATAATAGCTGTAGATATACTGCACATTGGTAACGGGCAAGTTTCATTATGTATTTCCCACAATTTCTATATTGTGCATTTTCAGTTTTGGGGATGCTTAGATGGATACATTTTGAAGACTTCAGGTGCACGTTCTTGTCACTGCTAGGATCTATGGAAAGGTTCAAGCTTCTCAACCAGAAATAAGGAATTCTCTGCAGTATAAAGCTATTTTTATCAGACTGATTATAATAGCTAGATATATTGCACATTGGTAACGGGCAAGTGTCATATGTATTTGCTACTATCTCTAGGTTGTGCATTTTCAGTTTTGGGGATGCTTGCTTGGATACATTTTGAAGACTTCAGGTGCACATTCTTGTCAATGCTAGGCTCCAT…
>DN33492_c0_g1_i1	len=347 path=[0:0-252 2:253-346]
GTTCTGACTCTGCTGAGTCACAAGTCTTAATAAGATCAAAGAAAATTGCATCAAAACAAAAAGGTGGATCTCATGAGATGATCCATCATGAGGCATCTAGGTACTCCAAGCCTACAAGGCTAATCATGATTAAAGATCAAATTTCAACATTTCCCTCTACCCCTTTTATGGGAAAAGGTCACTGGTGTCATTCTTCCTCTAGAAGTAGTAGGTGGGCGTGCTAACCCTGAGCTTGAGCTTAAGCCTGACGTGGAAGGTGAAACTCTTGGGGAAAATGTGGAAGATGAAGTGGGATGTCTTTCGACTCTTCCCCTAGTTGGAAGTCTCTATAGAGGTGTTCGTGGTAG
>DN33492_c0_g1_i2	len=209 path=[1:0-114 2:115-208]
TGATTAAAGATCAAATTTCAACAATTCCCTCTACCCCTTTTACGTGCAAAGGTCATCGGTGTCATTCTTCCTCTAGAAGCAAAAGGTGGACGTGTTGAGCCTAAGCCTAAGGTGAAAGGTGAAACTCTTGGGGAAAATGTGGAAGATGAAGTGGGATGTCTTTCGACTCTTCCCCTAGTTGGAAGTCTCTATAGAGGTGTTCGTGGTAG
>DN33421_c0_g1_i1	len=374 path=[0:0-373]
AGCACAGTGAGGTCATTTAGACCTTCACATATCCAGACCATGCTCTCATTATTTGTAAATAAAGCTAAATAAAGCTTAAAGGCAAATAAACAACAGTCTGAATAAGCAAATAAAAAAAGCATCTGCAGTTTAACTCCAATCCAGGATTCCAGGTTTGCTTCTTTAAACGGGGAAACGCACATAAAGGCCCTAGTTTGCTAATTAGTTGTTGCCATACAATTAGTTGTTGCCATACAATTAAAATTAAAAGCCCCTATATCTTTGTCTAGACAACCCATCACTTTATAACATTAGGCACCATAATAAATTTGCACAATAAGACTGTCCTATTAGCTAGATTGCAAGTAAAATGCCTAAACAACAAATAAGAACGT
>DN33407_c0_g1_i1	len=240 path=[0:0-239]
CCCATCTTAAGTTGCCTAAGAGCCAATGCTTGATTTGCATCATGCTCCTCCAAATATATGAAGTCACCTTTTTTCCTGGAATTCCTTCTCTAATCCAGCTAACCAGATGTCCGTTGGATAGGTATTTGTCTTTGACAATCTGTTGCCAGATGCCATCTCCACTAATGGCTCTCTAAAGGTTCTTTACCAGCAAGGTCACCCCTGGATCAAGTTTCATACAGAATCTAATGAAAAGCGACA
>DN33499_c0_g1_i1	len=548 path=[0:0-90 1:91-122 2:123-547]
GTTATGAGGCTCTTCCAAGGTGAACCAGTTTGGACAGCATACAATCGTCCAAATGATGACAACCCAGCTAGGTAAGTTCGTTAACTTACTAATTCTAACATCAGATCCTTGTCTTCGTAGCTATTTAGTTGTTTATTGGGACAAATCACATGAGACAATGGCAGATTAAATATCAGGTACTTATTTCATGTGGTTTTATCTCTTTGTACTTAGCTAAATTTTACGGGAGCTGTATTGATGCAAATTAATGGCACTAATGATTAAACTGGATCTCTGATTGTTCACTCCTGTTTGGTACATCTTGTGGAAGCAAATTTCTTTACATCATGTTGATCGTTCCTTCTTCTTTAACATGCTTTAATGAAACATACATCTTTTCAAATCATGCTTGATCTTTGA…
>DN33499_c0_g1_i2	len=516 path=[0:0-90 2:91-515]
GTTATGAGGCTCTTCCAAGGTGAACCAGTTTGGACAGCATACAATCGTCCAAATGATGACAACCCAGCTAGGTAAGTTCGTTAACTTACTATTTAGTTGTTTATTGGGACAAATCACATGAGACAATGGCAGATTAAATATCAGGTACTTATTTCATGTGGTTTTATCTCTTTGTACTTAGCTAAATTTTACGGGAGCTGTATTGATGCAAATTAATGGCACTAATGATTAAACTGGATCTCTGATTGTTCACTCCTGTTTGGTACATCTTGTGGAAGCAAATTTCTTTACATCATGTTGATCGTTCCTTCTTCTTTAACATGCTTTAATGAAACATACATCTTTTCAAATCATGCTTGATCTTTGATATAATAGAATATAATGGGATTATTAATAAAT…
>DN33404_c0_g1_i1	len=917 path=[0:0-916]
GCCGTGAATGAGCAACAAAAATTTTGAAAATTAATTTCAGTTAAGCCGTGAATGAGCACAAAGAATGACCAACTTTAAGTGAATACAGAATGCCAAACGAAATTCGTTTTACTTTCATATCTTAAGAAACCAAAATTGTTGCATAAACTTATGATGCTTGGGATTCGTTTCATTGATGAGGGATCTGTCTCGATCCATGCAGTAAACATATACGAAAGATATCTCGGGGAAATCCTAGTGGATCAGGATCCAATCTGGGGATCCGTCACTTATGACCGACAGACCCAGTAACACAGCTTTAAGAGCTATCCTATTGTTGAGCCAAATCTACAATGACTATAAATGCCACCATAACTATAATATGTTCATGCCCTACAATCTTCAACCATGTAGGAGGCA…
>DN41393_c0_g1_i3	len=1360 path=[1:0-896 2:897-1359]
TTTGTTGTGGTCTGGGAGTCTATGGCTGTTTTATTCTCATTGTGACATGTGAGTCCATGGTATGTTCATTTCTAACTTGAAAATCATATTATGTTTAAGATCTGAAAATCATGTTATGTTTGAGATCTCAAACCTAACTCCTTGCGTATTAGGCAACCATGCTTTTGTTGTGGTCTGGGAGTCTATAGCTGGTTGATTTGTTGCTTGAACATCATGTGAAGCTTGAGTTATTTCAAAGTTCAAACGTCATTCTGTTCTTATTAGGCACCCGCCTATTCTCTGTAGCTTGGGAATGCCTCCTTGGCTGGTTTGTAGGTAAAAAATCATGTTATGCTCAAGTCATCTCAAATATACATCATTCTATGCCTTTGGGAACCTATTCTCTCGTTGCCCAAGGAT…
>DN41379_c0_g1_i3	len=645 path=[0:0-32 2:33-65 4:66-213 5:214-232 6:233-644]
TTTCTCTCTGCAAATATTCCCATTGACTTACAAGATATGATAAGCATCACTATACAAATTTATTTTGTTAGTGAGCTCATCCTTACAATTTCAGAGTTCTTTATATTTGGGGTGTTGCCATTGAGTAAGTAATGCACTTTCTGTATCTCACAAAGTCCACTAGAAGGCATTAATTTAGAGATCTATTGAAAACTTCTCACGTTATTTTCAATTGAATTTGAAAGTGACATCTCTGTGGACCAGTGTTGCAAACTACCAATCTCTGTTGTTGTATACACTACTACAACAAAAGCTTTTTTGGGCATTCTTTCTGATACTTCAGGCTGTGCAAGATATGATAAGCATCACTATACAAATTTATTTTGTTAGTGAGCTCATCCTTACAATTTCAGGGTTCTT…
>DN41385_c0_g1_i1	len=998 path=[0:0-610 2:611-682 3:683-768 5:769-802 6:803-865 8:866-906 9:907-920 11:921-997]
TTTCACTTTAAATTAATTAATTTTTTTATTGACTACAAACTTCAACTTGAGATGCATATATTAATAGCAATATTTATATTAATAAGGTTTCATGTCTTAACATAAAATATGGCTCATAAGAAATATCACTTAAGCATTTGCAATGCATAATGTCTTGCTAAATGTAGTACCAAGACTAGAATCCCAACATAGAAGATAGCAAAAGGCATCACATTTATAATTTAAGTGTACATAACGCTCTATAGGCCATCTCTATCTCATGCTTCTACCAATTAAAATTTGCATCCTAAACTGAGGCACCTTTGCCCTCACTTGGCCCAACACACCCACTCACACAATTTAGTGCTAGAACATGGATTATAATTTTCATCCCAAATTCAGCACACTCCCGTCTATTCC…
>DN41385_c0_g1_i2	len=428 path=[1:0-28 2:29-100 4:101-186 5:187-220 7:221-294 8:295-335 10:336-350 11:351-427]
TGACCCATAAAAGATGACACATTAAATTTTGGTGTATATAACATGTTTCCTTTTATAAATGACCTTTGTCCCTATTTATTATGTAAATCCACCCTAAATTCAACTATACACTCTTAACATACACATACATATACCAATGCAATATAGAGACTTACATTTCAGACATAGTTAAAAGGCCTCCATCATAGAAAAGTTTCACCTCCAACCTAGGTATTTCCTATGTTGATAATAAGTTACCCCCTAAATGTCACCACACATTGCATACACACATAGCACATCAATTTAAACCCTCAAGGTAATTAATGGCTCAATTGATGGTGAATTACACCTTGAAGCTGGCTAAGGCTTTTGTTGATCACAAGTTGAACTCTAAATGAAACTCTAATACTTTTATGTGCC…
>DN41316_c0_g1_i5	len=538 path=[1:0-50 3:51-64 4:65-83 5:84-92 6:93-113 8:114-156 9:157-207 10:208-537]
ATGATAAAAACCTCTTCTGATTCGCCAGTTTTACTGATTCAATTTCAGGAGAAAAACCTCTTCTGATTCACTGATCCAATTTCAGGAGAAAAATGAGAAAAGCCTTTCATTTCACCTCTTCTGATTCACTGATCCAATTTCATGAGAAAAGCCTTTCCATTCTCGGAATGCCCCGTTGTTTTACTGATTCAATTTCAGGGGAAAAACAATTTCAATTCTCGGAATGCCCCTTCAGTTTTACTGAAATACACTTTCAGGAGAAAAGCCTCTTCTGATTCTCTGATCCAATTTCATGCTAAAAACCTCTTCTGATTCACTGATCCAATTTCATGATAAAAACCTCTTCTGATTCAATTTCATGAGAAAAGCCTCTTTTTAAAAGAAGTGTTAAACCTGTTT…
>DN41316_c0_g1_i3	len=652 path=[2:0-75 3:76-89 4:90-108 6:109-129 7:130-278 8:279-321 10:322-651]
GAATGCCCCTTCAGTTTTACTGAAATACACTTTCAGGAGAAAAGCCTCTTCTGATTCTCTGATCCAATTTCATGCTAAAAACCTCTTCTGATTCACTGATCCAATTTCATGAGAAAAGCCTTTCATTTCAATTCTCGGAATGCCCCTTCAGTTTTACTGATCTCAATTTCATGAGAAAACCCTCTTCTGATTCACTGATCCAATTCCATGAGAAAAGCCTTTCATTTCAATTCTCGGAATGCCCCTTCAGTTTTACTGATCTCAATTTCATGAGAAAACCCTCTTCTGATTCACTGATCCAATTTCATGAGAAAAGCCTTTCATTTCAATTCTCGGAATGCCCCTTCAGTTTTACTGAAATACACTTTCAGGAGAAAAGCCTCTTCTGATTCTCTGATC…
>DN41358_c0_g1_i1	len=650 path=[0:0-344 1:345-380 3:381-404 5:405-466 7:467-500 8:501-649]
CATCGATTAAACAACTGATAATGTGTGATCCCGTTGTTGTATCTGATATTTCATGAGAACACTTCACCCATCATCATCTGACCTTTCTGTCCCTGAAGATGGGTGCAATGTTCACCTGGACACATCAAGGAGATCACACAGTGTTCCAGAAATTTTCATCGTCAATATGCATCTATCATCTAAAAGGTGACATACCTCTGAGCTCACGTTTATCAAATTCTGGCATGATGAAAACTCAACACCAATGCATGTGCAATGGTCATATGAAATGCGGCGTTACAATTAACTTACCCATTTATGACATTAAGGCAGAGAGAAAACTCAGTGCATGAATTCATATACCCTGTTAATGTAAAATGCAACATTACAATCTGTGAAAACTGGATATTTTCTATGCAC…
>DN41358_c0_g1_i2	len=640 path=[0:0-344 2:345-380 3:381-404 4:405-405 5:406-467 6:468-490 8:491-639]
CATCGATTAAACAACTGATAATGTGTGATCCCGTTGTTGTATCTGATATTTCATGAGAACACTTCACCCATCATCATCTGACCTTTCTGTCCCTGAAGATGGGTGCAATGTTCACCTGGACACATCAAGGAGATCACACAGTGTTCCAGAAATTTTCATCGTCAATATGCATCTATCATCTAAAAGGTGACATACCTCTGAGCTCACGTTTATCAAATTCTGGCATGATGAAAACTCAACACCAATGCATGTGCAATGGTCATATGAAATGCGGCGTTACAATTAACTTACCCATTTATGACATTAAGGCAGAGAGAAAACTCAGTGCATGAATTCATATACCCTTTTAATGTAAAATGCAGCATTACAATCTGTGAAAATTGGATATTTTCTATGCAC…
>DN41369_c0_g1_i4	len=497 path=[1:0-152 2:153-157 4:158-172 5:173-249 7:250-250 8:251-257 9:258-286 11:287-293 12:294-308 14:309-371 15:372-389 17:390-496]
AATGTGCACTGCTTCTTGTGCGAACATTTGTTGCATGTTTATTAAAACGTTTCCAAAACAATTATAGTATCCATGATATCATATTTTGTTTTTGGTGATTTTCACATATGTTCTTGAATGTTGATGCAAGTGTTTTATCTTTTTTTGTCATATAGGAACTAGTACATCGCAATGACATATGAATCAAGTACAAATTGGAGTTAGTATTTGCAATCCAAATTGTTGGGATGTGTTGAGCAAAGCTATTTGTCATGGTGTCAGCTGTCTTTCTTTGTAGCATTAAAGTCGTGCGATCTAGTGTACACTGTGAGGATGTGTTGAACAAAGCTATTTGTCCAGGTGTTTGCTAGCTTTCTTTGTAGCAGTAAAGTTATGCGATTTAGTGTACATTGGATAACA…
>DN41374_c1_g1_i1	len=827 path=[0:0-826]
GGACAACACAAGAACAACAAATATGAAACAATATGTAATATATATTCAAAATTCGAGAAGGCCCGTCACAATGACTAAAACCTGCCTCTTCTCAACCACAGTCTGGCGGAAGGATGATAGGATAAACAAGCAAAAACCTAGGCTCGAACAGCTAACCCAAGGGTCTACCTTCCACACAGTAACCATTTTAGGCCGAGCCAAGCCGACGGGGGCTTAGGGGATAAACCCAGTTCTTTTAAAAACTCAGAATAATTACATTAAAAGTATTTGAGACAAAACCATTGCCTTAATATGAGTTATAGACTATTCTACAAACCCTACACTAACTATTGAAATGAGGTGGAACGCCTCTCAGCTAAGCACAGTACCTGGTGAAGAGGCATGGTCGCTTTCCTCCAA…
>DN41374_c0_g1_i1	len=523 path=[1:0-20 2:21-88 3:89-92 4:93-522]
CTTGACCCTGGTTTTCGTTTTAGGCTTCCCCCTTTTCTACTCGGTGCTCACCTATGAGAAGGCATCCTTAAGCCCAATTTTTGTTTCAGATAGGAGGGTTTTGTCGCGAACAGGGGGAAAATGCTAAAGTTCAAGTCCAAAATGTGGTAGGCAAATCCTGGAGGAAAGCTACCATGCCTCTTCACCAGGTATTGTGCTAGGCCGAGAGGCATTCCACCTAGTATGGATAGTTAGTGTAGGGTTTGTACACTAGTCTATAAATCATATTAAGACAATTATTTTGTCTTAGATGCTTTTAATGTAATTATTTTGAGTTTTTACAAGAATTGGGTTTATACCCTAAGCCCTTGTCATCTTGGCTCAACCTAAGTTGGTTATTGTGTAGAAGGTAGACCCTTG…
>DN41374_c0_g1_i2	len=519 path=[0:0-20 2:21-88 4:89-518]
AAGCGACCATGCCTCTTCACCAGGCTTCCCCCTTTTCTACTCGGTGCTCACCTATGAGAAGGCATCCTTAAGCCCAATTTTTGTTTCAGGAGGGTTTTGTCGCGAACAGGGGGAAAATGCTAAAGTTCAAGTCCAAAATGTGGTAGGCAAATCCTGGAGGAAAGCTACCATGCCTCTTCACCAGGTATTGTGCTAGGCCGAGAGGCATTCCACCTAGTATGGATAGTTAGTGTAGGGTTTGTACACTAGTCTATAAATCATATTAAGACAATTATTTTGTCTTAGATGCTTTTAATGTAATTATTTTGAGTTTTTACAAGAATTGGGTTTATACCCTAAGCCCTTGTCATCTTGGCTCAACCTAAGTTGGTTATTGTGTAGAAGGTAGACCCTTGGGTT…
>DN41302_c0_g1_i1	len=665 path=[0:0-664]
ATTTTCACAGATTGATGCTTTATTCTTCATTGGCATTCTTAGTGTAATTGAGTCCAATAGTTCAAAATTATATTTACATGAAAGTGCCATTTCAGCAATGGCTTCCAAATTTTGACCTAGCCTTTTTATTTGGCACTGAATTTGGAGTATGACTAAAAACAAAGCTTTTCAGACTCCAGTCTACTTAATTTATCAACAGCTGATGAAAGAGCCAATCATATTTCTTATTTTCTGGTTCCCGATGGAGTAAGGTGCAATTTGAAGAAAATTGTGAATGGAAATAAGCTTGGTTGATGGTGAGTTTGCAAATGGTGTGTCACACTGAAAGGCAATAGATGACTAGATTTAAGTTTGTGTGGAGATTCTCATTTTGGATTTTTTCTTTTCATTCAAGTCAAT…
>DN41311_c1_g1_i1	len=1086 path=[0:0-1085]
GAGGTAGGTGGAGTGTAATGCAGTTTTGAAGGTGAGCAGTTCTAATGTTCTGCAAATCTCAATATATGAATGGTTGTTGCTGTTGCTAAAACCTAGCAATATTTGGAAATATATGATAGAACAGTATGGAAGATAAGACAAGAAGACTTATCTTCCTCTCTAATGCTACATATGTCATAAAGGTACACCTAAAAAAAACAGCATCCCTGTGGTTAGTTTCAATCAGCACAAATGCCATTAGTACCACTGGTTGGGTGAACTCAACAATATTGCTCATCTCTCAGGGCTCATAGATGATAGGATCATAGGATCAACTGATCTTGATGCTGCTTGTGAAACCAAACAGGGTTTAGGACGACCCCTTGCTGGATCCACAATATCAAAAAGTGACATTACAAA…
>DN41311_c0_g1_i1	len=1374 path=[0:0-1373]
ACTCTTATAATGAAAGTTCCTGTGAATTTTCAATTTCTAATCAATATGGAAGTCGGTAATTAAAAATCATGCTAAGTCTGTTCCGCTGAAGTTTCAACTATGTAATTACATATTCTCAATAAATATGGAAGGAAAAACTCTTATAATGAAAGTTCCTGTGAATTTTCAATTTCTAATCAATATGGAAGTCGGTAATTAAAAATCATGCTAAGTCTGTTCCGCTGAAGTTTCAACTATGGAGGTTTTGATGTAATTACATACTCTCAATAAAGATGGAAGAAAAAAATCGAACAAGGACACAAACAAAGTGAAACAGAAAAGCAGCAAATGCTCGCTGATATATTTCTGTTATATGCTCTCCATCATGCCCAGTTGCAGCATAATTCTAACCAGTAGGAT…
>DN51077_c1_g1_i1	len=469 path=[0:0-468]
GGACAGCCCAGCATCCCAAGTAACTGATAAAGAAATGTGTATGTGGAGTTGTTATGGAAAATAATATTCCGATTCTTACTAGAGGTCATCATTTGGGCCTGCAAGGTCCATGGCTGACTGCGGCATCATGGCCCACGCAGAGCTATTTAGTGACTCCCATTGCCCCTCCACTGGAAAGTATATAGTTCTTTTAGGGTAAGCATAGAAATATTTACCAAATGTATCAAAGGTTGGCAAGTTTTGTGTACTTCTGGGAAATTCTGATCGAAATAATGAAGTCATAGGTTTTAGGTTTGAAATTTTATAAATCTGTAAAGTTTCAAACAGGAATCTATCACTTCAGTGTTTCCAACAATGTAATACTTATTTTCCAGAATGCACAAAACTAATTTTAGAAGT…
>DN51077_c0_g1_i1	len=248 path=[0:0-247]
TATGCTTCCCATCAAGTTCCTGAAATAGACATAGTCATATTAATATGAGCAACGATGTCAAGTTTTGGGTGGGGAAAAATCATAAATATATATGAGTTTTTTTAAATGTTTACAGGTTCAAAATTAGAGGGTAGAGTATATATGTTTTTTAGAATTTTTTGTTTTCAAAATTAGAATGGTAGAGTATATATGTTTTTTAGAATTTTTTGTTTTCAAAATTAGAATGGTAGAGTATATATGTTTTTTAG
>DN51025_c0_g1_i1	len=478 path=[0:0-477]
GCACTGGAAACCTAGAACATAGGTCAAACATGAAAATATAAGCACATAATCCCTTTCAACATGAAGTGGACACGGACAAATATTCATGGAAACTTGGTTACACCACATATTCTAATAATGCAAGGTATAACACGTTCATTCACTGCTTATGGTGCTCCACGTTAATTGTTGCAGCCCCTTCATCCATTTTATTTTGGTTGCTATAGGGATTCAAAGAGCACAAGTCTTTGTAACACCTATTCTAATAATGCAACATTTAGGATGTTCATTCACTGCTTATGATGCTCTATGTTGATTGTTAGAGCCCCGTCATCCCAATTTATTTGGGTTGCTACAGGGATTCAATTTGTACAAGGCTTTGTAATAATCCTTTTTCTAGGAAGCTACAATTGACTTATG…
>DN51034_c0_g1_i1	len=750 path=[0:0-749]
AGAGGGGCGCCCCAGTTCTTGGAAGGGTATGGCTACGAGCCCATGGAGGATGCAGATGTAGATGCAGACGGAGATGGAGACGGAGATGAGGATGACTCCTCCTCCCTGGTTGGGAACAGTTTGGGCGCTGGCGGATCGTTTGGATCCGTTCTCACCATTCCTTCTACAAAAATCGCTGCAGCTAGATGACAATGGAACAAGTTCTCATCCCAATTCTATAGATAAATTTGCAGAGTTAATTTTGTTTCTAAATGGGTGGTTTGCAATGTCACTTTCTGGTAATATTGTTCGTCCATGAGATCATTGGTTTTCAATGCCACTTAAAGTTTGGACTTGTATATAAAGTTTTGTTGGCAGAGTACCTCACTGTTTTTTTATGACAGTGAAACTTTGTGCTGG…
>DN51050_c0_g1_i2	len=319 path=[0:0-152 2:153-174 3:175-236 4:237-318]
ATCGCACTCCAAATAACAGAATCTACAGATTCTGTAGGTCTTGACAACTGAACAATATATGTGATAATGCTGGTTTCGTTAATAAGAATTTGACATGTTTAAAATTTCTTCCCATTTCTTCCCAGTCAATTCCTTAGCAGTTGAGTGTGGGACCACGCGATGGAAAGTTAGGGTTCTACAGTTGTACAGAAATCTAGGTATGTAGATAGATAAAGAGCACCACATAATTAATAAGGTGCTCATTGACTCAGAAATATAGTGGCCCAAATACAGGAAATACTAATAAGCTTTAGCATCATCTAGAAGCTCAACTATGATA
>DN51092_c1_g1_i1	len=325 path=[0:0-324]
AGAATCCCATCATTATGTTATTGGTTTTATCTGTCTATTCCTGTTTCTCATACATCTACATTTCTCGATTTCTATATCTAATGTAGTAACAGAAGATTCATTAATTCTCTTATGGGCTTAATGCCTCCCCAAAAGGTTATGGCATCACCACCAATTTTAGCTTTATAACTGCATGCTTGTAGATCTGCATTGGAGGATATGGAGCAAACTTTACAAGAAATGATTTCATACAAAACAGACAAAATTTCTGGAGCTTTTTGCACTTCATTAAAGCATCTCTATTCTTGGATTGATCTTTACAGGATTTATCAGGTGTGGACTTCAG
>DN51021_c1_g1_i1	len=235 path=[0:0-234]
GACTGAAAGTCTGTAAGTGACCTGCACAAACCTCCCCAGTCACAGTTACAGTGTGAATGCCTAATGAGCACAGAGCTACATTTAAACCCTGATCTTTGCCAGTCAAAGAAATCAATCAATAAAGAAAACCATGGTTTAGGGGCAGAAATCTACAGTGGCTAGTTGTTAATGAGAAAGGATTGAAACTAAATCAATACCGTACAAAGAATTAACCTGGTCAGAGGGCAGGCTTGGT
>DN51026_c0_g1_i1	len=605 path=[0:0-604]
GGAAGAACAAGTCTAGAAGGAGGATTTGATTGCTTTTGTCTCAGGAAATTCTACAGCATACAAATTATAAAATGCAAATACTTATCCCTCCCTGCACTGTCTTGATTTCTGAGCCATTGTCTGACTTGGACTGCTCAGAAATTCCTGCCACTAATAGCACTTGACCCCCATGAAAATTGTGCCACAATTCCAGCAATCTCTGCCTGGAAATGTGTGCCACTGACAGCCTCTTCCTTACTTGAAAAACACGCTATCAGACTTCCTTGGAACCCATGCTACAGACTTGCATTCACTGCCTCAGTTTCTATGCTGAGATTCCTTGAAAATCAAGCCTGCTTCCTGGGTTTTTGGGCTGCTGTCAAACCTGGGGAAAAATATGCTAGAAAACATCTCTTCCAG…
>DN51086_c0_g1_i1	len=299 path=[0:0-298]
ACATTATTGTTTAAAGTTTATTTTTGATTTTGCTCCCTGTTAATAGTGGAGTTGTATTTCCTTAAAAACATTTAGTCAGTCAGTTTCTCAGGCTTTAAAGACAGCTTTCAAGACTTGGCACCTGGTCTCTCTGCCAGCAGGATTCTGTTCTGTCAGTCCTGCCTCCGGGAAATGTTTCAACCATTCACTTTGGCTGAAGAGGTTGGCAGCATGATTCTGTCACCTCCTCGAGTCCAACAGCCCAGCTTCTACTTGAGTTGGAACTATTTTTCTGGTTGGTTAGTGTTATGACTATCCCG
>DN51074_c1_g1_i1	len=226 path=[0:0-225]
ACTTGATGGCGTAGTTTCTCGCCTGGGAAAGAAATCATGGAAATATCTTCAGAAATCCCAACATTGGTCCCAAAACACAAAATTAGTTTCAGTGTAAGCAAATACATTGGGATAATACAGGATAATCTGCAGAAGTCAAAAGATTTCATCATTGTATAGGACTACAATAGGAATGAAAGCATTAAAAAAAACAAGCAAATCTGGCATGATAGATGGAGAGAGGAGG
>DN51099_c0_g1_i1	len=533 path=[0:0-404 1:405-439 3:440-532]
ATCCACTTTTGTTCAAGCAAGGGGCAATGTCAATGATGTGCTTAACCATATCATAAAGATCCTTGGTCACATATATTTGAAAGGGCTTTCAAATTCTCCATCTCCAGTCTCTCCAGCATGGACTTGACCCATGCAACTGCATTTTAAAAAGGCATTCTTTGTGAACCACATAGCAAAGGTCCTCTCAAAACGAATCTATTTGAACTAGTGAACTTATGGGCCAAAATTAATAGCCCACCACATATGCCAATGTTGTTGCACATGCTTCCGTAGGTTCTTCCACAAAACAACCTTACATGTAGGGGGTCAAAGGAGAACAATCACAAATTTCCTTGATATTGGTGGTAGAGATGAGGTGGATGCAAGAGCAGTAAAGTTTCATGTACCATTTAATATTCT…
>DN51099_c0_g1_i2	len=511 path=[0:0-404 2:405-417 3:418-510]
ATCCACTTTTGTTCAAGCAAGGGGCAATGTCAATGATGTGCTTAACCATATCATAAAGATCCTTGGTCACATATATTTGAAAGGGCTTTCAAATTCTCCATCTCCAGTCTCTCCAGCATGGACTTGACCCATGCAACTGCATTTTAAAAAGGCATTCTTTGTGAACCACATAGCAAAGGTCCTCTCAAAACGAATCTATTTGAACTAGTGAACTTATGGGCCAAAATTAATAGCCCACCACATATGCCAATGTTGTTGCACATGCTTCCGTAGGTTCTTCCACAAAACAACCTTACATGTAGGGGGTCAAAGGAGAACAATCACAAATTTCCTTGATATTGGTGGTAGAGATGAGGTGGATGCAAGAGCAGTAAAGTTTCATGTACCATTTAATATTCT…
>DN11931_c0_g1_i1	len=424 path=[0:0-423]
GTCTGATACATTCAAATTGAACAAGACAATTGAAATGTTTAAGCCCAACTTAATGACAAGTAACTAACAGGATGTGAACCATCTATCCTTCAACCAAGGTCCAGATTGTATCTTTTGAATTGTTCTATCCAAATTAACAAGGGCATTAAATGGCATTATTGACTCTCATATACACGTCCATTACGTGAAGATTAAGCAGTTTCAACCAAATGCTTTTGTTTCATATGACAAAGTTTGGCCATTTAAAGTTCAGCTACCTACCAAACAGCTTTGAGTACACACGCACAGTTTCAGCCCCATGTGACACCCCAATCAGATTATAGAAGAGGGACCAAGCCTCAATATCAAGAGGTGTGTATAACTAAAATGCAAATCACTATGGCTCAAATACAATCACCA…
>DN11909_c0_g1_i1	len=979 path=[0:0-978]
GCCATAGAACAAGATGTGTGTGATGCTAGTAATGTAATGTATTGTCATGGTCCATTGCAATAGTAAGTGAATAATACAATTAAATGGGAGCCAAAACTACTAGTGATAAGGGATTATTGGGATGAGAATGTATAATTGTAGAGATTTTAGCTCTACTCTACTTCAAATTCACCAGCTTTTATGAAATTTAGTTGCTTTTATTGTCGATAAAATAAAACTACATTCAGTTGAAATTTAGTTGTCAAGGTTGTTCCTTCTGAATTCGCTTAATAGGGTAGCAAGGCACAAGAATCACCGACGCTAAAGCATAATTAAAGCTCATGTAAACCATAAGACATGCGATCTCCTCCAAAGTTGTGAAGGTCGCGAATTCAACTTCTATATACCATGTCGATGAAT…
>DN11995_c0_g1_i1	len=271 path=[0:0-270]
AATAAAAATAAATCCACAAAAACATAAATATCAAACAAACTTTCCTCCTTGATGATGGTCGCTGGAAATAAAACTCATCCTGATGATGGTTGCTGAAAATAAAACCCATCCAAAAAGGAAAATTTACAGAATCCAATACCTCTAATTCCCATAAAGATTTGGTTTCCTCCCCCAAATCTTGACCTCTCAAACTTTTAGATAATTACTCTCAGCTGTTAAGAAAGTATGGGATAATGTTTCTCTATCCCAAAACTCAAATCTGTTAAGAAAA
>DN11981_c0_g1_i1	len=301 path=[0:0-300]
CTACAATTATATAAAATTACCCATCAATACTATGATTTCTATAAAACCTAAATCCAAATATGTTAGTTTTTTAAATAAAATTTAAGAAACTCAATTAATCAATAAAAATTAGCAAGCTCCAACTCATCACCGAAAAACTTAAACAAAGCACAAAACTCTACTGCGACGCCACCAACTTTTAGGGAAGATGTCAGCACCAAAAAACTTAAAGAAAGCACAAAACTCTACTGCGACGCCACCAACTTTTAGGGAAGATGTCAGCACCAAAAAACTTAAAGAAAGCACAAAACTCTACTGCGAC
>DN11938_c0_g1_i1	len=342 path=[0:0-341]
ATATATTACAACCAGAAAGATAGTTGCTAGGATGGCAGGGTATCTGTTCTGTCTGTGCTTATTGGTTTGGAAGGTGTGTCTGGCATAATTCAATCAAATTCTGCAGATGCACATATTTACTGTCCCTTTCAACTTTCAAGTTTCACTTATCAGACGTGTTGGTCCTGTTTGATGTTAAAAGTTTACTTCACCCTTCTATGATTATGTACTTTGATGTTTTAAGCCAGAGTCTTCAAATTTAACTTAAAAATTAAGCCCTGGAATAAAATGCCGGTGAATGATATCTTCTGCTGAAAGAGTACACGACATGGCTTCTGCATTGGACTGCCCTATAGCATGGAG
>DN11951_c0_g1_i1	len=564 path=[0:0-563]
GTTCCGAGCATATTTTCTATGATATTAAACAATGGCCTTGTTTAATATCCGGTAAAAAATGAAGTGAACAAACTTAAACTGCTTAAAGTCAGGGGTTCAAAACAAAAGACTGTTACCTCGTTCCAATATAGGCTGATCAATGGATTGTATAGGAGGAAATTATGCAGCCTTCACTGGAAGCCACTGGATTTGCACCCAGCACGGGCTGCAGAATGTGCTCCCATTCTGAGATTAAGCAAAGCACTTAAATGTTTTATTAATGTAAGTTTTCATCTGTCACAAAGCTATCGACAAGAAGACGCGAATAACAAACATGCACGAAAGTGGTGCCATAGCCAAAAAATATCAAAACATATTATTCGTTATAACTGGATACATAGTACCCCTCCAACAAATAAG…
>DN11971_c1_g1_i1	len=210 path=[0:0-209]
TTCAAAAAAGGTTGCTACAAGTATGAAAGTGTGACATCAAAGGAAAACTCCAGATTTGATACATGCACAAATCAGAAGCTTCTAGACCCAGAAATTCGATCTCCTTCTTGCTTATCTTGGTACCAATATCCTCTTGCAAACTACTACTCAGCCACTTCAAAATAATGCTTGAATCTTCAATACTATGCCCTCTGATCCTTGAATTTTCAG
>DN11971_c0_g1_i1	len=532 path=[0:0-531]
TCTCAGGAATAGGCCGAACATTTGTGTAATTATTCCAGAAATATAGTTCCATTCAGACGAATTTCCTATGCTGTAGCAGACCTCTCAAGCAAGGTGGATCAAACTTCTTATCAGATTGCCTATCTCTGTCTACAAGGGCTGAAAATTCAAGGATCAGAGGGCGTAGTATAAAAATTATAGGACCCTAACAATTTCTTTGTGACTCCAGCGCCAAATCTTCAAGGTCGAATATCAGTTCCAAACAGGGACGAGTTGCATATGTTTAGGAGGCCGAATTATTTGCGTCTCAGGAATAGGCCGAACATTTGTGTAATTATTCCAGAAATATAGTTCCATTCAGACGAATTTCCTATGCTGTAGCAGACCTCTCAAGCAAGGTGGATCAAACTTCTTATCAGA…
>DN11985_c0_g1_i1	len=1805 path=[0:0-1082 1:1083-1278 2:1279-1804]
GACCAATCTCCCCCCATACATCCGAAATACACTGCCCAACACAACTGTAATGCTAGTAGTAGTGACCCTCACCCACACTGACCATCATTGCCAACTCTCAAGCATTATTGCAAATCCCTACAGATCTCAAACCTTACTTTTAATGGGCTCATGACTAGTACAATGATGACAAAATCTGTTACAAATTTCCTCGGAACTAGTCACCGGAAAATATTACCAGATGACATGCAATGTTTTGAGTTTTTAATGGATTTTACACGGTTGGTGAAGTTTTCTTTTATTAACTCAGATGACAGCTTTTTCTAATGTGCTGGAACGATTACAATCTCAGAAAAATGAATGTACTGGATATAATTTGATCTGTTTGTCAAATACCACAAGCGAGCAAGGGATTTAGAG…
>DN11985_c0_g1_i2	len=1609 path=[0:0-1082 2:1083-1608]
GACCAATCTCCCCCCATACATCCGAAATACACTGCCCAACACAACTGTAATGCTAGTAGTAGTGACCCTCACCCACACTGACCATCATTGCCAACTCTCAAGCATTATTGCAAATCCCTACAGATCTCAAACCTTACTTTTAATGGGCTCATGACTAGTACAATGATGACAAAATCTGTTACAAATTTCCTCGGAACTAGTCACCGGAAAATATTACCAGATGACATGCAATGTTTTGAGTTTTTAATGGATTTTACACGGTTGGTGAAGTTTTCTTTTATTAACTCAGATGACAGCTTTTTCTAATGTGCTGGAACGATTACAATCTCAGAAAAATGAATGTACTGGATATAATTTGATCTGTTTGTCAAATACCACAAGCGAGCAAGGGATTTAGAG…
>DN11928_c0_g1_i1	len=406 path=[0:0-405]
TGTAATTGTATTTATAAAATTATTGCAAATATCACAAACCATATAAAGCGTATATTATCCCAGCACATATCCAAGGAATAGCTTGCCTTTCTAGAAGGTTGTGGTAGATTCCTTCAATATCATTGGATCTAGTTTGGCATGGAGCGTGTTTGAATAGGTCTTGATCCTTGTATAAGTAGAGTTGATCAGCATAGACTTCATCAAGTTGTGGTGGCATTTTTGGTAGCACAAGGTAAGAACTTTAAATCAAATAGTTGACTTAGGCAACAATTCTATTTGGGCCCAAGGATGGTTATCAACAGAGTCTTAATTTACCTAATGAATGGCACCAACTATGGAATGACTACACCAAGGCCCTCAAATATTCACATGTTAGAGAATCCATGATAGGTAAGACAA…
>DN11917_c0_g1_i1	len=590 path=[0:0-589]
ACTGTGGTCATCTATTATGCTTTGAAAATAATAAAATAATATTGTTGAACAAAGAAAATCTGAATTTTCAGATATCTACCGATGCATCATTAGAAGAAAAAACTCATCTAGTTGATGTAGGCATCGACATTGATTCTAGGCCAAGAAAAGGGGAAACAAAATGAAGAAAGCCTTCAAGTAATGCAAGGGAAAATACAACTGGGTGTAAAGAAGTCACAAAAATTTAAAAACAATAAAACGGCATCCTTTTACCTGCAGCTGCTCACAAATCTTGCATGCTTGTTTGGAAATGATAGAAATGGGAAGTATAAAGTTTGTTACTTCCATTATTATTTACTTTGTGAATTTAATAAATTTCCATATCCTTGTCAAAATTCTTTTTGCCTACGTAATTTTCCA…
>DN11984_c0_g1_i1	len=539 path=[0:0-538]
AAGAGAACAAAAAAGATCGGCAAATATATATATATATATATATTCCATGAAAAACAGTGAGTCATATTATAACTAAACAAGAAGCAAATAAAAGCAAGTAATTGGATGACACTTCCCAATTCGGGGGTGTCAACATAGATTGCAACCTCGTCATCATAGATGGCTTCAAACAATGATAAAAAAGACGAAATGTAAGTCAACAAAAAAAATGGGGATGGGCTCTCTCTTTTTTTTTTTCAGTTTTGACATGTTTCACTTGAAATAAAGTTTCTAGTTTAACTAAATTTCGATTTGATCATGATAACAAAGACAAAATAAAAATGCAGAAATAACTTGGATTAACTCTCAAAAATTTTAGTTTTTAATCCTAGTGCTAGTTAACGCTACTCAAATCCCATG…
>DN11905_c0_g1_i1	len=234 path=[0:0-233]
TTCTCTACAATATATGAACCTGGGATTATTAGATTTGGGTTTTGTTTGTTTTGTGTGGAAACTTCCCTCTTAATGCATCCTTGAAAAAATTTGGACCCTTGTCTGTCGAAGATGATATAGCGGGTGGGATTGCTCCTCGAGCACCTTCTTGTATTCTTAAATTTTGGATAATGGTAGAGTTCCTTTGAATATCGTTATCTTTCAAAAGGATCTCATCCTAGAACACTTTCCCAG
>DN11913_c0_g1_i1	len=1185 path=[0:0-1184]
TGCGAGTTTCTAACTCTTACAACACCTGGAAATGCACCGATTTTCAGAGGACGGGGTTCCTCCTAATTTTATGCAGACACCCGTGTTTTTGTGCGGTGGCTGCTAGTGAGTGAGGGTTTCAAAGGGAAGGATCTCGCAGGTGGTTTACGCTTTCAGGTTCTTGGTCAGCGAAGAGTCTAATGTCTCCAGGTCCTGGATATTGAAATGTGCGCTCCTTTGGCCATTGGTATGTGACGATGCCACTGGTGACGAGTTTTCCCAGGAAGTGTTTGTCGTAATACCAATATGAGCCTCTGTGTGATAATGGGCTAGCAATCAATCCATTTTTCAAAACGTTTCTGCCTGTCATCAGCATTTTCATAGTGAGTGATGCGAGAGGGATCTCGCAACTGGTCGTCG…
>DN11901_c0_g1_i1	len=446 path=[0:0-445]
AGTAATCTTTCTCACCTGTGCATATGCTTAATTTTTTATACTCTGTATTTTGGTTTGAGATGCTCTGTATCAAATATTGAGGTTTTCAACTCATAAGCACACACTGTGAGGTTTTCCACCTGGGCATATGCTGTGTACCCTGTTTTTGTTTTAGATGCTCTGTCTTAAATATTGAGGTTTTCACCTCAGAGAGGCACACATGGGATCTCCCCCTTACTGGGAAAATGCTTAATTTTTTGTATACTGTATTGGTTTGAGATGCTCTTTCAGTAAATATTGACATCTGCACCTGGCAATATGCTTAAATGTTGTGCTCTGTTTTAGTTTGCACCTTACACAGACACTCACACTTGGGGCATATGCTTAATTTTTCGTTTTGGCTTTACATAATTTTGAATG…
>DN11952_c0_g1_i1	len=290 path=[0:0-289]
AGTTGTTTAACCCTTGGGGTTTCAGTTTTGTTGGTCTGTCGATACTTGGTTGCCTCCAGTGCAACGAGCCCATCCTGTCGATTTTGTTTTCTGTTATGGGAATGTGTTTCGACCTTCTACTGTTGGTTGTCATGTCTGTTGTTTCGTCTGCATACTGCTTTGGTCTATCTGGGTTGTGGAAACCCTCCTTGGCCTATCTCGTTTGTGTGAAGGATTGTTGATTATTTTTTGAGGGCTCTGTGTCTTGAGGCCTGTGTGGAATCTGGAAGTTTTGTCTTGTACTTTCGCGG
>DN11944_c0_g1_i1	len=210 path=[0:0-209]
TGCAAGGTTAATATGTATTTATTGCTTGGCACCACATTGGTGAATATTTAGGGTTACGCGTGTAATAAAAATCGCAACAGCAATTCACGTCCAACAAAGATCCCCGCTATTAGGCACCGATGCCTAAAATCCGTAATTTGCAAATTCAAAGGGAACCGAACTCGTAACCACCAGCAGACTAACGACAAACCTTGAGCAATCAAAAACCCT
>DN11959_c0_g1_i1	len=515 path=[0:0-514]
GGCAGTACTTACATAGTGACAAGGTTAGCAAAAAAGCATAGATAAAAGGTTTAGCATTTACGACATTACAAGTTATGAGTATTGACTACATTTCAACAATAGTGTGCTGTAAATAATCATTCTTGCTATGTGCTAGTTCATTTTCAAATGACATATTCATGTTCTATATGGTAGACCTATTGTCAAGAAGGATGTTGCATGATTGCCTTTGCAAGATGCGATAGCATTGCCAGAGCACATACGTGTTCACTTTTGGCATGGCAATCAGTTAAGGGTTCAAATGTGAAACAGCTTGTTTTATTTTGATGTGGTATTTTCTTGGCATATGTCACTTCACTTTGGTAGCACTTATGATAATATGTTTATTTTCTATTGTCCATGGTTTATACTTTGGATGTG…
>DN75074_c0_g1_i1	len=328 path=[0:0-327]
ACAATTTTGACTGGGCTTCTTTTGATACGAATTACTGGAATGCCCTTATACTTTGCACGAGAAAACTCATACTTCATTTTTACAAGCCTTCTCATAAATGAAGCTTTCTCATAATGACCAGGTTTTCCACAATAATAGCACTTGCATTTGATACCTGGGCTGAAGTTTCCTCTCCTTTATGCTTTGAAGTTGTGATCTCTTTGGCTTCGTCTCTTGTCTCTTTGGTGGCCAAACTTTGCATTTCTTTGCCCTTATGCTTTAACACAAAGGCATGTTCACAATTCTTATCTTCATCATTTAGCTTAATTTTTTGCTTATCCGGTAAGAG
>DN75012_c0_g1_i1	len=234 path=[0:0-233]
GTATGATGAATGCAATTAGGCTGACATACAGACTGCTCAACCTAATAGCTTCATCCTTCTTCAAACATACCAAGTTATCATGATCATCATTTTCAGCAGGAAGTGGCCTTGACAAGTACATACATACACCTTTGCTTCTAAATAAGGCGATCATTTGATCTAGCCAAAAATGATAGTTGTCCTCATTTAGATGGGGAGACAACCACTTTGAATCCATAAACTCAACAACAACAA
>DN75001_c0_g1_i1	len=253 path=[0:0-252]
ACCAATATTCAACCCTCTAACTAGACCAGAAACTTAGAGAAAACTCGACCCTTTTTCTCACTAGATCTCAGCCTACCGGGCCTCTTGAATTCGATCTCCAGTAGGGGCTACACTTGGCTGCAACAAAAGAACAAACCCTTCCCCAAACGATTATGCCAAAAACCCTTTTACATCCTAGGTACAATAAATATATCTCACACAAATTCCTTCAACTCGGCTAGATTTCCAAATCGACTTGGTTCATGAGGTGTAA
>DN75027_c0_g1_i1	len=272 path=[0:0-271]
GCGTATAGGTATATCTAGTTTTCGTAGGCAGTGCGTGTTGCATCCTCAGCTCAGCCTGTAGTCTGGAATAACTATCTTTTGTCGTGGTGTTCATGGCAGCTTTGGGATGGTTTGTTCTTCTTGCAATCCACCTTACAAGTCAGACTATCTTCCTTCTGACCCAACTGATGAGCGGGGTTTGCTAGTAATCTCCTGTTCCTCCTGCTGCTATGCTCTCAATTCGGCAATCAAATATTCTACAAACCGGATGAGAGACGGTTTTTATCACGCTT
>DN75067_c0_g1_i1	len=340 path=[0:0-339]
CACCATGTTGGGCCAAGTCTCTATCTTTGAGCGTGAGACTGTTTTTGGGCAGAAGTTACATATCGGCCAGGTCTGCAGTTTCATGGTAATCTGTGCGTGTTTGTACCTGGGCGAGGGAATACACTATGCTAGATTCAAAGCAAGGTTCGAGACCACCTAAAGGAACCTATCATCATCAAATGAAAAAGCTACAATAGCGATATGTGTGCAGTATAGTGTGCTTTCCCATGACGTGTGTGGCATATGTTGTATACAAAATAACCAAAGAAGGGTCATGATCAGAAGTTGGCAAATATGAATGACAACAACATTTTCAAAGACCGAGTTTGAAGGAATGAGG
>DN75070_c0_g1_i1	len=232 path=[0:0-231]
GCCCTCTTTCCCCTACCAAGGTTTGTCACATACTTCCATAAGGCTGTTGAATCAAGTTTGTTTGTACCTTCATCCTCACTTTGACCTTCATTCCCTTCCAAACCTACACCATTTTTAAAGAATGCGTCCGGTCATTCTGAACATCATCCTATTCTTTCTTATCATGCCTATTCCCTACTAACACCATAAGCATAAAAAATGGAAGCACACACCAAAGGAAGAACATTTTCTT
>DN75069_c0_g1_i1	len=256 path=[0:0-255]
AAGTGATGAAATATGTGGACGACCGACTTGTATATGTTCTAACGTGCTTTTTTTTAATTCAAAGGTGCCTATACAACTGTGGAATTTTACTGATCCGAGCCACAAATTTGAATTTTGTAGCTGACCTGTGGACTGTAGATTTGTATTAGCTGATGAGTATCAAAGCCAACTTGATGGGGACTTTAATATGGTAATATATTTAGTTCTTTTAAGAGGTTTTACTGGCTGGTCTAGATGTTGAGTCTTTGTTATGTAG
>DN75090_c0_g1_i1	len=252 path=[0:0-251]
TCACAGCGGAGGTTGCATTCATTTCCCCTCAGGCCAAGGCTTGAACTTCAGCCCGACATTCAATGGAGAGAGTGCAGAATTGCAGAAGCAATGATGGCATATTGATTCCCAACATCATGTCCCTCCCGAAATTAATTCAACAACGTGGTATATATATCCTTCTTTGGGCCCTAAGTTTTGTAGAATTCAATTTCAGGAACGAGCCGGTATTCAACATCACCATTCGCAGCCTGGACATTAATGAAATTCGGG
>DN75077_c0_g1_i1	len=288 path=[0:0-287]
GATTTGATTTGGCCCATCGCTGGCACTTGGGGTATACATGATCAGCCTTCTTGGTGCTTCTAACTCTACATGATAGTGTTTGGCTGCTAAAATGGTATCATCTGCGTAGGGGAAACTTTCATGATGATTCCTGCTATGTTCTCTCTTCGATTTATCCACTTATAATTTGTTGATGTAGAACCCAAACAAATGTGGTGGAGAGTGGGCAATCGTGTTTCAACTTTGACTTGTATGTCATGACTAGAACACTTGGGTAACCCTTCATTAGTTTTGGATTTTGCGTTGGGC
>DN75093_c0_g1_i1	len=239 path=[0:0-238]
GTATTATCTATTTTCTTATTGTTTCTGTAGACTGTAAAACATTATTGGTAGTTTCATAGCCAATTTGTAGGTAAACTACCGAAAATGGACTGGGCTTTGAGGGTAGGTGATTTAGGTAGCGCCTTACCTTGGTTTTACAAGCATGTCAGAGAGAGCTACTCAGGATCCACGAAGTGGCCTTTTCATTAGCCCTTTCAAATCGTACCAGAAGCTCATATATAACGAAATAATATAAAAAA
>DN75045_c0_g1_i1	len=202 path=[0:0-201]
GCCAAAGATGACCTGTCTCCCTGCCCTGCTATTCTAGACAGAAACAAACAGAATTTCTCACTGAAGACCATTACTTACAACTTTCACACAGGCAAAAGCCCACCAGAAGTTCATATGAGACCTTACAAAAATATCCTGACAAGTGTACAGATAGGTAGTCAGGGACAGAAGTGCCGCATCCTTCTATATCCAAACACCAAAG
>DN75014_c0_g1_i1	len=278 path=[0:0-277]
TCACTTCTGCCATCTTACCCATCCAGTTGAAGACAAACTAGGAAGCTTTCGGCCTCGAGAAGGTGGCCTACAATCCTCCGGAACTAATCTGTCTCAGGTTGGTCACAATGTTGAGTCCTACGACGTTTACTTTGTTCCAATGATTTCGTATAGTCACTCTGCGTGAATTCTCCATTGGTTGTTATTCTAGCTTTACTTGGTGAAAACACTTGGTTTTGGGCGGAGGCTATGTGCCAGCCATGGTCTGTATTTAATGTATTATTTAAAAGAGATTTGGA
>DN75007_c0_g1_i1	len=202 path=[0:0-201]
TGCGTATTTTCCAGAATAGCACTGGGCGATTTCGACTCCTCTCCATTTGTCTTATATGCAATTATTTTCCTTTCATCCAGAAGAAACAAGTTGTCGGTTAGCAATTTGCAGTCTTTATTATTCAATTAACTAGAAATGGAAATAGAAATAAAACACACATTGAATTTCTCTTCCTACACTATTAATTCAACTAAACTCTCAA
>DN75068_c0_g1_i1	len=214 path=[0:0-213]
AATTCAATGGGTCGAAGCCTTTAGTGGACAGAGATCGGATCCTTCATTGCGTGGGCTGAAATTGCATTTGAAGTCGAGTCATTCTGCTACTTTGTGCCGGAGACGAGTTCTTAATTGCAAGAGAGGTTGTCGTTTCATGTAGCAGAATTTGAAGCCCAATTCTCATTTGTCGAAGTTATACACAAAATCTTTGTGGAAGTCGAACTGGTTGGTG
>DN75080_c0_g1_i1	len=263 path=[0:0-262]
GGGATCAATGTCATTAATGCATTATGAAGAGAGCACACTTAACACTTCACTATTATTGAGGATCGGTTGATGGAGCAAGTTCGTTGAAATGCCATGAAGACATCTTACTTTCATGAAGTATTCTGACATTACAGTTGAAGGGGCAATCACCTCGTTGACAAATTCTTCACATATGTGGTGGCATGGGGACTCTATGGTGCATTCTTTCAACTTATGGTTTTGGACACTTAGTGATGTTCAATTTAGTTGCATATGGATTTGAG
>DN75062_c0_g1_i1	len=205 path=[0:0-204]
AGAATTTTACCTTCACACTTTTACCAGAATTTAAGAATGTTCTCAGCTTAAGAATTATACTTGAGAGACATAGTAAATCAATTATTTATTAATCAAGCACATAGACATATAATATTAAGATGGCATATAAAAGTTTTGTTAGAAGGCATGCCTCCTGCCTGAAAGGCTTCATTCTTATTCCAGTACAGTTAGTCCCACTTGAGAG
>DN75036_c0_g1_i1	len=324 path=[0:0-323]
ATGCGTTTTATCATTGTCTGCTCTCGTAGGATGATCAGTTCTAGGATTTATTTAAAAGAACAGAACCAACAACAGTGTTTGCGAGAGAAGATATTCACACATAAAAACAAACACATAATGGGTCTGAAGTTCGGCTAGATATTGCAAAAATATGAAAAAAAAGGGAGTTCGTAAATGAATGGTTCTGATGTTTCAAGCTCTCATCTAAAAGCAACCAAGTAAAAGGGACTAAACCTAAACCTCTGTTGAAGATACCAGAATACTGAAACAAAAGTATAAATTGAAGAGAGTTTCAATCCATGACTGAGGAAAAGTTGAAAATAA
>DN75020_c0_g1_i1	len=244 path=[0:0-243]
GAGTGCACAAATACCGAGGCCAGGTCATTTGCTTTTCTTGGTTCATATATTGTATCAGTGCGTTTCACAGTTCACAAATGCATTTTGTGCAAAATCCATGTAAATCAAATATCAGAAAAGCCAGCCATAGCTGTACTAGAGATATAGAATATGAATTGATTCAAAATTCATAGGGCTATCTCATATTTTGTTTTTGCTTCAATTCTGTATAGAAAACTATTTATGTATCTATTGAAAGCTCAGC
>DN75083_c0_g1_i1	len=350 path=[0:0-349]
TATGAACATGGTTACTTGTACAGTTTTCCTATCCTTTTGCATGTACTAATACACCTCCCTCTTTCTTTTCAAATTTATTCATTAGGGAATCCAACATCCTTTGTAATGAGTGCATCTTGGATATCACTTCTCCAAAAGCCATGTGCCCATGTTCTTGGATAGGTTCCTCTTCTCTAGGCAGAGAATGGAGAGGTGTAGGCTGCAATGGAACATATGCACCTCAACATCTAGCCTCGCCTTTCTTTCTTCTTCTATCCATGTCCACCTTAGAATGGTAGGCTCAAGTACGTTACTCAACAATTTGGTTGATACGCAAAGAGTTGGACCACTCAAGATTCATAACATGGAAA
>DN75017_c0_g1_i1	len=276 path=[0:0-275]
GCTACAACAAGCGACCTTACCTACCACGCAATCGACCGTACATCCCAAGAGCAAGATGATTGATAGGGAAATGAATGCAGCAACAGGGGGTGATATATCCTCTCCTATAAGGATGCAACATCAGGAGAAACGAGCAATCATGGGACTGCAGCGACGGGGCACCAAGGAGGCGGTAGCAAAGGACCTTCGGTTCTGGGCACCTAATGACAAGCACGAATGAGGGGTCAGTGTTTGCCTAGGGCCACAAAAAAAGCCGAGATTCATCATACCAAATAA
>DN75016_c0_g1_i1	len=244 path=[0:0-243]
GCCTGAAATCTTCATTTGATTAAACACCTATTATTTCCCTTGTCAATCGGATTTCTTTGATCCGTTTTCTTGAAGTATTTCTGGGTAACTATTCTACAAAAGTCGCAAGCAGCCTCACCCAGTTTTAGGGCACACCGTTCGGCTTGGGTAGATTAATACTCCGTTGACCAAGGCAGTGAGAGAAGGTCATGTTTGCAACTTCGATCTGTATTTTAAATCAAAAATACATTATAAATTGCAATGG
>DN75000_c0_g1_i1	len=260 path=[0:0-259]
AAAATAAAAATGAGGATGAGGAAAGGAAGTGCAACTAATGAAAAAATAAGGGATTCAAATTTCTTTTCCAAGGCTATCATGATGCTAACTAGTAGTGGAGCAAGGACTATGATGCTATGTGAGACTCCCACGACTATAATTGGTGAAAATATTTGTATCTCAAATATATTAGGCCTTATGATGGAATTAATCCTAGATCATTAATGAAATATTTAGAGAAATAAAAGTCATTATTTAATAAACTTGACATAATAGACAAG
>DN75079_c0_g1_i1	len=432 path=[0:0-431]
GGAAGATATTGAAACATTTCATCCACTTACCCAAAAATTCATATTGAAACCTGCAACTTTAAATATGAATCGACACCATCCTGCACAGAACTCCTATATTGAAACTGATCTAAAATGCTATTACTCAAGGAAAAAGACATACCTAATTACCCAGGGACCTTAACCGAGCATACCTAACAACGCTGAAGGACGGCTTATTACCAAAAGCTCGTAAGAGAAATAAGTAAGAGAATGCAATCTTATTAGCCCAAGGACTATAACAGACCATACGTACAGCACAGAATGACGACTCTATCTCTGTAGCAATGGCTCTTATGTGAATATTTTCAAAATCAGCACTAAAAAGCCATTCCAATGGATGATTGATGATTCATGCGACATTGCTGGATGATGCATGTA…
>DN75035_c0_g1_i1	len=262 path=[0:0-261]
AGATAATTGATTCTCTATTGAATGATATTTCTAACATCTTAGTAGTCTGTAGAAAATTTGAATGATCTGCACCCTTACCCAGTTTACAAATTTTGCAAGAGTTTATGAAGCCCAACCCATATGTTTTGGCATACAAATATTAGCTTTTATGCATTCATTTGAAACATTTAAAAGGTGCTTTACTAGTATCGTTGCACAACTGAAACTACAGAAATAATAGCAAGCACACACACAAGTTGACACTCTTATTTTTGGTCAAATT
>DN75008_c0_g1_i1	len=275 path=[0:0-274]
ATAAGTATTTATTAAAAGCCTTTGTCAAAGAAGACGAAAGTCTGAGTATAAGTCTCATCGAAGTTCTGAACATATCCAAGTTAGAAGTCTAGAAGAATTTCTGAGCACATGTGTGGGCGATCAAATCCATGCTTAGAGAGTCACCTTGCAAGTTTGAATTAGACCTCATAGACTCAAGCAAATCCGAATTATAGGCCTAATTGATAAGCCACAGTCACCTTGAAAAGGAGCCAAAAATTCCTACTATAATTCTGTGCAAATCGATTTGATTGGAG
>DN75057_c0_g1_i1	len=246 path=[0:0-245]
GCTTGTCTGGTCCGTACGAGCAGATTGCTTTATACGGTTGGGGAAGCTGCAGGTCATTTGGCGAATTTGACTGTTTAGATATCTTATGTTGATCCAAATCCCAAAGACACATTTTGTCCCTCTTTGTCTGTCTGGTCCGTGAGTGGAGTGTTTAATAGGGTTAAGGCCAATTGCAAGTCTTGGTACATCTATAGAAGAAAGCCCTTCACCTATGACATGAATATAGTGGAATATATACCTTCACAT
>DN75026_c0_g1_i1	len=247 path=[0:0-246]
GCTGTATTCACTGAACGTACTAAATGATATAACGCTAACTACCAGAGATAGTTCGACCAGCCAATCTACCCCGAGTGCTGGCCAATGTTAGGTCAACAATTCGACTCCTTGGACAGCAGATTGTGAGTTAGATCCAGAGTTATTTCCCAGTGAACCGATTCCATACTCTCCTCACCCAAAGATTGAGCAGCACCATCATATTCTTGCTCAACATGTGGAAACTCTACTGTCTTAAAAAATAATAATT
>DN75060_c0_g1_i1	len=323 path=[0:0-322]
TCAACCTTTCAAGCACACAAATACCAGAAAGATGAACGAAAACCTTTACAGCGACGAGCAGAAAACGAAGATATCGGAGATCATTATTGACATCGAGGACGATACTGAGGCGGATCTTCTATATTTCTTTACTAAAGAAGATCCTTGGAGAAACGCCGGCAACGGTAATTGTATTGAGGACCTGTCTGTGGGTCCTCGAGAACAACAGAGCTATCAGGACGAGGATAAAGAGGCAAAAAGAATTCTGCAGAGGGCAAGGAGAAAGAGAAGAATTAAAACTTCCTATAAATTTAAACAGGGTTAGGGCCGTTTTTAGTCATAAG
>DN75091_c0_g1_i1	len=604 path=[0:0-603]
TAACCTTCAGGAACCAACTGGACTGGTTGGTTTGGTAGAGCTAGTTTGGTTCCGATAACATTGAGATGAACAACACAACCAATGATCTTATTTTGGAAAAGGGAAAACATTTGGGAAAGATCAAACCAATCTCGTTCAGCCTAAAGAGGAAGCATATGCTATTGGGATGAACAACACAACCAAGAACCTTATTTTGGAAAAGGGAAAAAATCTGGGAAAGATCAACCCAATCTAGCTCGGCATAAAATGAAGCATTATATGCATTCATGGTATGAAACAAGGATGCAAATGGTGTCAGGTGTGATGAATCATTTTGGGATGTTGATTCTTAAGCTACAACACATTTCACTAGCCAAAAGATTGGTTTGTTGATTTTGTACAAGACAAAACACAATTTCA…
>DN75047_c0_g1_i1	len=235 path=[0:0-234]
ACTAATTGCAAGGATGATGTTCCTGCAGTGAAATAACAAATGACGTGATCAAAATTGAAGATGTTGACCATTCACTGGGGTTCAACCCAACAACTGCAGTGTTTGACAACATGGATGCTTTCACAAGTTGTGTACGCTTCTTTCCCAGGTAGGTGTTGGGGCACCTATAATCCACTTCATAGTCTAATTCCTATTATTTTAAAAAATTCATAAATTTGCAATTGGGAAACTTCTA
>DN75003_c0_g1_i1	len=307 path=[0:0-306]
TGAGAATTAATTTGTTGTTGTTATTTCATTCTCCAATTGCATGTATTTTCTTCAATTGAAATCGGTTTTTTTATATAGAGTTTTGTGGTGTCTATGTAACTGATCTCTCATTACTAATGTAGAAACCCAAACATAGTTTCGTAATTAACTAAGTTAAATAGTTCACCCTTAAGACCATTTGAGACCTGATGCCATAGAGGAACAAATAGTTTTACGTAGATACTAAATAAATGAGCACGAATTTTCTTGAGTTCTTTTTCAGCTATTAACGTGCATGATGAATGGATAATTTACATTTAATGATATG
>DN75053_c0_g1_i1	len=229 path=[0:0-228]
TCTCAGGAGAAGTCTGGTGCAGTTTACCGTCCATGGTTCCTCATTTGTAGTTAAATGTGATATTTAAAGGTTCTATATGACGAAGACCACCATGGTTCACATTACATATGCATTATTGATGGCCCAATGTTGATTATTAAATGACAGGCTCCATATTTTCGAAAGTATTAATGGATACATTGCTTGGATAATGTATATGATATATTTGTAGATACATAATATATTTTTG
>DN75039_c0_g1_i1	len=265 path=[0:0-264]
GGGGGTTTTTGCACAAGCCTCTGCCGAGCAAGCGAGAGAACAAGAGAGAATCGTTTCGAGGGCGTATTCAAATGAGAAGAATTCCAATTGACAGAGAATTCCCAAGTGAGAGAAACAGAGACCACGACCAGGATGGTCGATTGGTTTCAAAGGCACATTCCAGCAAGAAGGGCTATAATTGCCATGGAATCATGGCAATAAGATCGGAAAAGGGTGTATTTAAACATCAAAAATACCAATGCATTCGAGTAAGAAGAATGGCAAA
>DN75065_c0_g1_i1	len=342 path=[0:0-341]
GGTTATATAACAGCATTATTTCTAACAATTCAACAAATCTAAAAGAAGTCAATTATTCAATTATTCCAAGGGCATTGTAGAGGCAAGAATCACTTCAAGGAATCAAAATGCAAAAATGGCCAGAGAGTAGTTCAAGATTGTTGATCATTCTCTTCCAATATAAGATTCATTACCTGTACTGGAACAACTGTTCCAACTCACCTTTCGAGACAGCATAGCCATTAACAGTAAAGCAACACAAATCCATATATTAAGGATTCGACGATAGTTTTTATGATAACATGCTTTCCATCACCAAGCAAGTAAATGCAATCAAAGCAAAACTGATACGTTAACATAATT
>DN75038_c0_g1_i1	len=306 path=[0:0-305]
TAAGGATACTCTTTCAGAGCACATATCTCTGGAGCAATTCAGTTTCCTCACTAATCGTCAGATTCATGACGTTGTTGCTACAATGCAGGAGTGCATCCACTCAATTCACTCTAAAAAGATGGAGGCTTTGGTTATGAAATTGGACATGCATAAAGCCTATGACTGTGTTGACTAGGCTTTTCTACATTTGATCCTCACAAAAATTGGGTTCACAGTGAACAATGTGGATTGGATCATGGCTTGCGTTACATCAATAAATTTTGTTGTTTTGATAAACTTCCTTCAAACTTTTTTCTGGCTGGCAGA
>DN75082_c0_g1_i1	len=326 path=[0:0-325]
GGCCTTTAGTATCCAGGTAGTTCCTTCAGCTATTACAACCAAGTCTTCCTCCTCAGCAGCATTTTCTGCTTCAGTGTCCTCAGAAGTTCTCTCATCTGAGCTAAAATGTAACGTCTCTTTCCAAACCATAACAGCAGAAGGGATCGACTTAGTAGCCTACCCAAATTCAGGTCAACTATAGTCGGGAAAAAAAAGGGATCAGCTGGTTTAATTGTTTAATGGAAGGCAGCATTTTACTAGTTAAATAAAAGTGGCAAGTCACTTGATAAAAATAAAGTGACCCATGGTATTTCCAGCTGCCCATGCTATTTTGAGAGAACGAAATA
>DN75081_c0_g1_i1	len=290 path=[0:0-289]
AGGGCGGGACACTGCAAGGTGGGAAAGCCATTTGTGTTTATGGTGTCCATTTAAACCTTGATCTTTCCTTATTAACTTGTTTATAGGATTTAATATTGAAACATAGTATGGAACAAATCTCGACAAAAATTATTTTCCTAGAAAATGTTAACTCCATTTCAAGAAGTTGGAGGTTGTAAACTATTCATGGATTTGATTCTATTTGGATCAATGTAAATCCCTTTTTTTCTAACAATATGACCCTAAACTTTTCTTTATTGTACTATAAGCATACATTTCCTTGAGTTAAG
>DN75002_c0_g1_i1	len=214 path=[0:0-213]
GGGGAAAAGAGTCTAACAGTGGCCTAGGAAAGAAGAAGCTTGTTGGTAACAATAATTGTCAAACCAAATTTATCAATCATGGAAGCAAGAAATCTCAAGCATAGGAATTAGAACAAAATTTGCATTTAGGAAATCATGTGGTGAAAAGCCCAATTTCAAGATTGCTCAACCACCTCTTGTGAAAATGAGTTAAGTGCACCATGCAAATCTTCCA
>DN75095_c0_g1_i1	len=285 path=[0:0-284]
GTTTCTTTTTACAATGAATACCTTCATGGTTGAAATCATTACATAGATAATAGTGCCCGTGAAAGAAATTTGTGTATCTAGAGAATGATGGGACTGCTTGTGAATTCTCCTTTTTCAGTTGCAGGTTTTTCCTGGAATGATTTGTCTTCATGTTTCTACAATTCGCTGAAGTGTGCCAAATTTCTGATAGCTATAACACCTTACATTTCTCATGATTTTCTTTGTCACATTCTTCAGCTTCTGATCTTGATGAAGGTTGCCTTGATTACTGCTGTAAATTTATGA
>DN75075_c0_g1_i1	len=252 path=[0:0-251]
GATTCCGCACTTTAATAGTGACTTAGCAACTTTCAGTTGCCAGCTGCATGTGAATTTATGAGAAATTGCTGCTACAGATTGGTTAGTTTCAACGTTCCAGTTTTCAGAAGATATTAGATAATAGCACATTTTTAGGCATTAGGCTTTTCCTGAAATCCATTTTACATGTGACACATTCTTCCTCGAGGCTGCCAAAATCTCTCTGCTAGGATAGGCCAAGGAGATTTGGCAGCTCGATAATTTTAATCAGGC
>DN75061_c0_g1_i1	len=266 path=[0:0-265]
TGGGTCCTATTAGCACACCACTTTGGCCTAATCGGAGGGGCTCTGAAAAATCAACCTTTTTACCCCCTTCGGGGTCATTCACCTCAATCATTAATCCATTCCATTGAACCAACCCTCAGAAGGGGATGCTGGGCTTTTATTAATTGCATGTGAATTTGTGTCGCATGGATTTAGCTTCGCTGGGAAAACAGTTTGTTATTCTTTTTGCCGATTTCAGTTTCTGTAGAGGGATAGGTTGGTTATGGTGATAAAGTTTAAAAAGTCGG
>DN10201_c0_g1_i1	len=226 path=[0:0-225]
GTCACAATGAAATATTTTTTTGCCCCCCAAGTTGTTTTAAAACAATTTTTTTTTTAAATGAACTTTTTTCGCGTCCGCGGCAATTTTTTCACGCGATTCACTCCCAGCATCACACACGTCGCTCTTGGAGAAAAATTTAAAAGCTCGGGAGCGATCACTCCCTGATTGCTCGCGAGATTTAACTTTTGCTCCGGGAGTGATGAGAGCGACGCTCCCGAATTTGGCA
>DN10283_c0_g1_i1	len=213 path=[0:0-212]
GTACTATAGTATTGTAAGAAGAGTCTAGACAAGAGCAGACTTCTTTTCTGGAGGATTTCCCGCGACCCGAAAATAGGCACTCTTTCAAGTGTTTCTCCTTCAGCGGAGAATAATCGAGTGTTGCAGGGGGGCTCTTCGTCCGTGGAGAATAACTTTCCCAATTGTGGGTACCGGAGCAATACCGGAATGCTTAAACTGGACTTCAACCCATCA
>DN10229_c0_g1_i1	len=206 path=[0:0-205]
TAATTAAACAGATTCGCATACAAATATTATGTGGAATAAATAGAGATAGGCACAAAAACAAAGATATAAACACATATATACGAGTGCAATACATCCACAGAACACACAGATGTGGCCAGGACAAAAAAACTGTCACTATTTTATTCAGACTCTGAACAGCAGAAGCAAAGTAGCCTAATAACGGTGATTTGGAGGGTTGTTAGTGA
>DN10244_c0_g1_i1	len=210 path=[0:0-209]
TGACTGACTAAAAGTTTTCAAAGATTTCAAAAGCTTGACCAGGAAATGCATCATTCAGATGTTTAGAGCTTTGCCCTTCTAAATGGTCTTAAAGTTCCATAATCTAACCTCAACGTCTATGCACCAAAACAATAGGCGTGATAGTGTTACTTTTGCAACTGTCCTGCTCAATGCTATAACAATCCAAAGAGTCATGCAAATCACTTTTAA
>DN10257_c0_g1_i1	len=574 path=[0:0-573]
GGAAATTACACAAGGAATGCTTCCCTACATTCGTGGATGATATTCCTAGTAAACTTGTTGGTGAAGTGTTCACCCGAAATGTTGGGCACATCATCGAACACAACACAGTTTACCAGAAGTACCACATTTGTCAAACTTTAAGGATAAAATTTGAATTTCGATGCATTTAATAAGCAGTCACACAAATTTGATGAGGTTTGACCAATTTAATGAGCCCGTTAACTGCGTTGTCATCTTTTGTAATTATGCAATAGCTGACTTCAAAAATATGCTTGCATTGTACAACTGCTTTGTATTGCAGACTGTACCATACATTGTTTGAATGCTTTCCACCTACATACTAGCCCTTGTACATGGATGGGTCATGGATCAGGCTATTGTGTGAGGTGGGCGAGGTTT…
>DN10230_c1_g1_i1	len=266 path=[0:0-265]
TTGTGTTTGCAGTCTTATAGAAGGTAGGGACTACAGAGTTGGTTTCTACATTTCACTAATCTTTTTCTTTTTGAATTTATACTATGCAATCTACCTCCAATGGACCATGTGCTTCTGTTTTCTCATATGTGGTGAGGTTTTTATGAATATGATGGTTACTAACAAATTCAACATGTTTATAGCTTGACAGTTCTAAAGTAGCATCTAGCATGTTACTAACTATCCTGGGTTGCGTCACTTTCAGGAAAGCATTAAAAAGAGTTAAA
>DN10294_c0_g1_i1	len=928 path=[0:0-927]
GTCCTAATTATAAACACACTTTATTCTAAGATTCACTAGAACAAATGATTTCTTTTGGTATGTCATCTGACTGTTACTGCTTATTTATTAAATATGTTATCCTTTGCAGTATGCTGCTAACTTACAATTTCTTAGCCCTCCTTTCTTGCTTGGCCCAAGGGTCAGATGGCTCATGGATGACCAAATTTTCTTAACCGAGGGCCAAGGGAAAATGTCGTGGTGAATGGATCATTGCAATTAATATGATTTTCACATTAAGGTTGTGAGCATGTTATTGTGATATTTGGATCATTTGTATACTGGTACTTTAATTTTGTCAAACCTACACCTCACAATCATGTCGAATGTTATGAGCTAAGCACTTGTATTACACAAGCCATGTGTCTAGAGATCGAAGTT…
>DN10231_c0_g1_i1	len=797 path=[0:0-796]
GAGGAATTTAGAAAAATAATCTCAATACAATATTTATTTTTTTTACTGCTGAGGAATCCAAGAAGATAATCTCAATACAATATCTCAGAAAACTGATATATTGCAACTAGTAAATGAAAGTGAGGAATTGAAAGATAATCTCAATATAATATCCGAGAAAAAATGACAACAATAGGTTCCCATCTCTGTTCCCACGCAAACGCATTATTCCCTTTTCACCCTTTCAGACGAGTAATGGATCATGGATTCCGCCATAACACACATTTGTAATGGACGATGGAGAATTTTGTCTACAAGGGTTCACGCGGAAGAACGCATGAGTCATGCTCTAATGGCGGTCTTTATTGCAATTTTAGTGGCGGCACATGCATCTCCTCTTTCGACTTCTTCTAATTTTAC…
>DN10203_c0_g1_i2	len=208 path=[0:0-207]
CGGGAGTTGAACCCGCGTCCGAAATTCCTACATCCTCGGTACTACATGCTTAGTCAGTCTTTACATTCGCTTGCCAGCTGCGGACGGACACGCCACTAACAAACTAGCCTGATTAAGTTTTAACGCTTCAACCCCAGGCAGGGCTTCCACGCGATCTCTTTTGGGTTTGACCTCTCTTGATCCCCGTCCTAAGAGCGGAGGCTAGGGA
>DN10225_c0_g1_i1	len=1458 path=[0:0-1457]
GTCAAAACATTCCAGTGCTCCTCTGTAAACTCTACTGATTTCACTATTCATTGAAAGCAAAACCTTTCCATAAATAAAGAACACAGCAATAATTACAAGTCACATAAGCTGCTGCTCCATTTCATCAAATGGCAATCTAGCAAGGTTCATCATCAGAATCCAAAAGGAAGCCAGCTGCTTTGAATCTATAGAATATTAAAATGCCCTAAGAGATCAAAATCATCAGGCATGCCATTTGGCCAACAAGGCCTCTCACCTGGAAGTTGGAACCTTTACAATAAACAAGGGTATCCTTCTCCCTGATTCGTTAATCTCTAATGAACGAGTAGTCCAAAGTTTGGAATGTCATTCACCCAAGCCAAGTGACATGTTAACATTAAGTGTGGGAGGGGGTGGGGG…
>DN10227_c0_g1_i1	len=439 path=[0:0-438]
GTACAAACTGCTCAATTTTTTTTGGACATTTCACATGTTTTTACATATTTTATATCCAGAAAGGTCAAGCAACATGATGACTAACTGTGAAAACCTATACACTCAAACCATTTGTACTTTGCATAACAGCTTCAAGATCTTCCCAAGCTCTTCTGGTAAAAGGTAAACTGCTTTTCCTACGTATGGCCATTGCATATGTGGTGCATAATGTTCAAGGATCGCTAAAGATTGCTTGTGAACTTAGTGTGGTAGCTCCCCATGCCAATCGTTTGGAGTATTTCTAAAGCCGGATAAAATTCTTAATGCAGCATTGGAAAAATTTAGCATTGCATATTGGCAGATTTTTGGTTGATGAAATCTGTTTTTAGATGGTCTTTGAAGGTTCAGGAACAGGAACCA…
>DN10242_c0_g1_i1	len=201 path=[0:0-200]
GTTCCTCAGAGATGATTGCATCTTCTAGTCCATTGGGACGGGCTCAATGTTGGTTTACGAGGGTCTCAATTTTCATGGAGTTTGTAAGCATTCAGATGGACTGACTCCCTTGTACAATTAGGCCTCAAGCATAAAACACAAAGGCCAGTGGCAACTCAAACATTAGCTACGACAACTCTACCTGGGAATTCCAAAATGGGG
>DN10280_c0_g1_i1	len=235 path=[0:0-234]
GTATTTGCGTGTGCACCTTTAAAAGACGCCTTCTATAAAAATAAAGTGACCATTCTCTCTAACAAGCACCAACAAATCAACTTTAATTTATGAAGGAATATGCCCCAAACGTGCCTTTTTAAACCAACCCTTTAGGAAAATCTTTTCCTTACACTTACTCTTGAAGATGTCAAGACACTTTGACTTTTCTTCAATTTCCGCTCCAGGGAATTTTATTTTCACCTTTACAGACTTG
>DN10264_c1_g1_i1	len=242 path=[0:0-241]
ATAGGACACCAGGGCGAAGTACCTGTTGATTAAGAAATCACACAAAAATGTTATTTGATACTTGAAATATGTCATATAGTGTGAATCATAATGCATCAGAGTCTTTTGCAAAATGCAAAGCAATCTACATAAAACTTAAAAGTAAATAACTGTAGTCTGTAACATGTACTACAGATATTACACCATGATGAGCACAGATTCCTTAGAGAGAATGAGCAAACCTCTCGAAGAAGGCTGACAAA
>DN38668_c0_g1_i1	len=341 path=[0:0-82 1:83-340]
ATCTGTAAACGAATCTAATGCTTGGTTTTGTGAAAAAAATGGGTTCTTTAAATAAAATGGCAGTACCAGTTTGTCTCGGTCTTAACTGCTGAATCTTTGAGCTGTATTTTTCAGGAGAGCGTTCAGAAAGGTTTGTACTCCGATTTTTCCTGTTTCCAGGAAGAAGTTTCTCCATTCAGAAATTTACCTTAGAATTTTATCGATTCAGAAATTTAACTGTAGGAAAGTGTATATCACGTCATCTTTTCTTTCATGGTTAAAGCTTATACCCTTCTCGAAAGAAACGCATATTTAGATATTCAATTAAACCTACTCGAACTATGCTTGACATAACATACCCG
>DN38668_c0_g1_i2	len=201 path=[0:0-82 2:83-200]
ATCTGTAAACGAATCTAATGCTTGGTTTTGTGAAAAAAATGGGTTCTTTAAATAAAATGGCAGTACCAGTTTGTCTCGGTCTTGCTGAATCTTTGACCTGTATTTTTCAAGAGAGCGTTCAGAAAGATGCCAAAATTATTTTCAATGCAGTCAAGAAACAACAAGGGCCAACCAGAGCGATAGTGAATCTGTTGAAATCCT
>DN38675_c0_g1_i1	len=222 path=[1:0-74 2:75-221]
TGAAACACTTTTATGAGTAGGTGTTACAATTGTCAGGATCACACTGCTTTATGACTTGAGTTAGGAAAGTACTTGAGATCAGAAGACCACTTTGCAAATGAAGATTGTGCATACATCAGAGAACAACTTGGGTCCATAGACTTCTGGATGCAATATGGTATAGGGATCCCCTTGTTTCATTGGTTGGCTATCCATTTGCTTTCACAGGTATGCTCAATAACA
>DN38613_c0_g1_i1	len=355 path=[0:0-109 2:110-354]
GTTCCGACCTGATGGAAGTTTGTTGAAGGCTGTGATACTAATTAATATTTGAGCAGGTACTACTGACACCTTGTTAGTATTCAAGGGGCCGGCCACATTGATATATTTGTTGATTTTCAATGTTTTCCATATACCGCTGAATGAGTTGATGCTACTCCTGCACGTTGAACAGATATATCTGCAATTTCATGATCTCCATCAACCACTCTTGATAATCGCTGATTATTCGGGTCCGTTAACGGACCTTTGTGGAACTGTAAATTAAAACCTCCGGATATTCACTGGGTGATACTGTTGCCACCAGGATTCGGCCCAGAAGGTGCGACTTCCACCTCCTTGATAAGAAAATTGGGAT
>DN38613_c0_g2_i1	len=206 path=[0:0-205]
CCATTTTTCCACACCACGGAAGAAGAAAGAAACAGTCTAATGTGGAAAACTGAAAGGCGTTGACATTATATCTTGAATGGAAGGCACAAATAAAATGCCATCTTTCTTACCAATTTTCCCTTTTAATTCTCCAGTGCACACCTTAATCCATGAAAGATACCGAAGTAGCTCTTTACGTTCAACGTCGTGCGAACTGATTTGATCTT
>DN38684_c0_g1_i1	len=525 path=[0:0-524]
TCCGAGAGCCATAACTCTGCCTGTTCTTTCAAATTCTAATCCCAGTCCGATATCCTATATATTTTGCGAACCACAGTGAGGTTTTAGTAACAGCCAAAGTGTTTGGTGTGATAAGGGGCAAGTTTATTGACTTTAACCTATACTTTCAGAGGCAGGGAAATCTAAGCTGAGCCTCTGCCAAACGATTACAACCTATGATTTCCAGAAAACCACAATTGTTTTGTGGGTCGGTTGTATGAGGGCGGTTTTGATAAGAATATGTCTACTGTGGCCGGACTTTATTTAAGTGATGTCAAATCTTAATGGTTAGGGTTTATGACAGTTGAACTTACATCAGGTTTGAGGGTTTTAGGGACAACGAGGCTCTGTTAGTTGAAGATGCCGGGGATGACTACTGTT…
>DN38691_c0_g1_i2	len=1268 path=[0:0-720 2:721-1267]
GGCAGTGTCAAATAACGGCTAGGCTATTCTGATATAAAGCTTATACATTGTAATCTTATACTTTGTTTCTAAACTCTAGTCACAGAGCTCCTTGTTGAAATATCAAAACCAAGCAGTGGCAAACCAATCAGTGGCATAGTTATAATGATTGGACAGTACGTTGTAGCAGAGTATCAAAGAATCAGAGAATGATCAAGGTCATCATACCATAGAAACAACTAAACTGATCAAATGCTGACATCCAGCAACATAGCAAGTATGGAATTTAGTAGCACAATGGCTAATAACTCTCTCGAAGGAAATGTTCACTAAATCAAACAGTGAAATACATGCAAACATGTCTAAGAATATTTTTTCTTTTCTGATGGAAACAGGAAAGGATGGATCCACTAACATGTC…
>DN38615_c0_g1_i1	len=415 path=[0:0-414]
CACCATGCGAATTACTGCAATGAATCTTACGGATTCACTGGATCGAATTCATAATTCCTATACATACTCCAAATTTGAACTATGGAACGCTAAATTTTGAGACTAACCCTGGCGCTTACTCTAACAAAAATAAGTTCAACAACTCATAGAAAAATACAACAACAGCTGAGCTTCATGGAAACTATAAAACGAGGAAGGAGCCATAAAAGGCAGAAAATGTTACTGTACACCTTGCCCCTCATCATTTTCAGAGACGAAAGATAAGACATGATGAAGACAAAATAAGTCTAGTCAGGTCAGCAACAACTCTGATATTGCAAGTTGATGACTGAACACAGGAAACATTTAAACGAGTTTTTTCATTAAGAATTGCAATTTCTAGGGGAATACGCACTCTAA…
>DN38626_c0_g1_i1	len=416 path=[0:0-415]
GGGCTCCTCTATTGACCATTGTTTTAACTCGACAAAAAAGGTGATGACATTAGAACAAACATGCCTGCACGGAGTGCAAATGCTTTTTTACTTGATGTGCAAGATAGAACATCAGAATTTAGGCCAAACATTGCTCCACAAATAATTTGATCCTCACGGAAAAACTTCTAACAAAACTGTTTACTAGCAATCAAAGATTTATTTGCAAGAGTTTTTTTCCATCCAGGATAGGTAAATTTTTACAAAGGAAACATCCACTTGAAGCAGTTTCAAAGGGATGTGAAAGAATCGTTGCTTCTTCAAACACTATATGTCTTGTTATCCAAAGATGGTGAACCCTTAAAATTTGATCCAAGCTGCAGAAGTTCCTTCAAATAACATAGATCATATCTCACTAGT…
>DN38609_c0_g1_i1	len=319 path=[0:0-318]
AGTTTTTTTATTAAATGCAATTGTCTGATGTTAATTTTACTTCATAAGGGACTAGTTCATCTGCGTATGAGAAAAATTGGAGTGAATATGCCTTTATCCATTTGGTAAAGAGGAATGACTTGGCACAAAAAATGCACAAGATTTGGTGTTCATAGACTCAAATCTACACCTACTATCTCAACGACAACTAGAGTACCAAATAGGACCCACTAGAACGTGGGATTGTGGCATTTCACAAAATGATGTAGATGATAAGATTCCACTTGATTTTTTGCAAGACAATGTTGACACATGCTAAAAAACATTGGGCAGACTGTTG
>DN38605_c0_g1_i1	len=203 path=[0:0-202]
TTTACATCCATAATGCATCATTGAACAAACTAGAGTCCAGAAATTACTATTGTTTTTCATTCCCCATGATTTTAATTTTTTACAACCTGTTTTACATCCATAATGCATCATTGAACAAACTAGAGTCCAGAAATTACTATTGTTTTTCATTCCCCATGATTTTAATTTTTTACAACCTGTTTTACATCCATAATGCATCATTG
>DN38647_c1_g1_i1	len=252 path=[0:0-251]
GTTCTTCAATATTTTATTACAAGTAGTTCCTCTCTCTACTGATGAGGTCAATCATTAGTGTAAATCTCTTTCATTATTGTGCCAAGATTCTTTATCAGTTTCGCCAAATCCATCATGTATCTTAGGAATATTGTTCCACAGCAACCATGTTCACTTTGCCCTTAGAACTATTCTTTGTATCCTAATGGAGAAGCTGTTTCCCTATATTTCCAGTGAAGATTGGAGATCGATATTGCCGTGCCTAACTATTGA
>DN38645_c0_g1_i1	len=445 path=[0:0-108 2:109-280 4:281-322 5:323-444]
ATTCAGTGCAATCCCTTAGCCCTTAGAAATTCAACAATTGCATCCTCTGCCTGCTCCCTATGTTACACACTGCACATTTCTAGCAAATTTTACAATTTCCTCACCATTACCTTGTAGAAGGTAAAATATATGACATTAAATGCAGTCCATTAGCCCTGAAAAATTCAACAATTGCATCCTCTGGCTGCTCCCCACGTTGCATATTGTACATTTGTATCAAATTTTGATTTACCGCAAATCTCCCCTCAAAGGTAAAAGAACCACTGAATATATGACATTCATTGCAATCCCTTGGCCCTGAGAAATTCAACAATTGCATCCTTTGCCTGCTCCCTATGTTACACACTGCACATTTCTAGCAAATTTTACAATTTCCTCACCATTACCTTGTAGAAGGTA…
>DN38645_c0_g1_i2	len=700 path=[1:0-363 2:364-535 3:536-577 5:578-699]
CCATTCTTCATTCCATGAAAACCTAAAACTATATAGAAAGCTGTAAAATGATAAACAAACTACACCATTTTTGTTACATAAATAACTAAATAGTGAACTATAAAATGATAAATTATAAAAATGAACTAGTACAGTCCAGAATGGCAAAATGCCCAAAACATGTACTCGCCACTCAATGTACATGCTAAATAGTAAATAGCATAAAGCTGCAGATAAATTACATCTTCTGGTTCAATGCTACCAGAAATAACTGTGCCTTGTTGAACATGCATCTTTGGAACCCCATATCTAATAATGTTCTTCTTAACACACGGTAGCCTAGTGTATAAATCTTGTCCCAGAAACTACAATTTCCTCACCATTTCCTTGTAGAAGGTAAAATATATGACATTAAATGCA…
>DN38612_c1_g1_i1	len=424 path=[0:0-423]
GGAGCTAAACTCTAGACAAAGAAAACCTCTTTTCACTCTTTCGAATGCCTGCAATTTTTTGATCTCTGGCCTTTCCAATATACTCTGCCTTTGCCAAGGAGCTAAAATCTAGACAAAGAAATCATCTTTCATTCTTTCTTATGGTTTGCATTCTTCTTGATGTCCAGCCTTTCCCGTATACCTTCCTTTTTCCCTTTCATTTTAAGTCCATTTTATCAGCAACTGGCTCTCTGAGTCTCTGCTAACAGGAAAGTTTGAGCACGAAGGGAACTGAAGTCATGTAATATTGCTCTTGCGAGGAATCTGTTGAATTGACTTAGAATATTCTAAACATAGTAACAAATTTCAGTGTCAGAGTTCCATGAATGAACATATAAAGTTATAAACCAACAGAATCAG…
>DN38612_c0_g1_i1	len=679 path=[0:0-678]
ACAATATAGGCAAAATAGTTTAGACCAGTTATTCTCTGCCGCAACCTTTGTTAACAGATTATATCCGCCCGAATTAGGGAATCTAATAATAATAATAGCATTATAGCAGAGATCCTAGATCCAAGACGATTCTTTTAAATGCATTATACAATGGATTAATGGACCGTCATGCTCTGAGTGGATGATTAGAGAGGGAAAAGAAGGAAAGAAATTGCAAAAGTTTAAAATGGACATGTCTGGGTTTTGATGGTTAAATTGCCCATCAAAGAATATTTTGCATGCCAAATGGTTATGGAAATACTACCTGTCTGAGAAACTGTCAGTTATCTGCGCCAAAGTAATCTCATCTTCATATTTCTTGATAAGGGATTGGAAAGCTTACTCCCAAAATTCAATTAG…
>DN38687_c0_g1_i1	len=1374 path=[0:0-1373]
GTAGTCCAGAATATACGTCTTTATAATAAAGAAAACGTTTTTTCCATTATAAATATTAGTCCTGATGTCCTTAAATCCCAAAGTCCCATGTGTCATCGACATGGTTATAATTTGAAAGTGTTAAACCTAATGTTAAGTCATAAGTAAGTCCTAACTGTTATAGTCATAATGTTAGTAAAAACAAGAACCCTAAGAATTTAATATAGTAGTTGACAGACACTTCAAAATATTGGCTTGGCCTATTAAAAAACCTTGTAATCCAATGTCAGGCAAGTTGGAGTGACTAAAGATCTTGACAGTTAGCAAGTTCTCCTTGTATATTTAATTTTGTTCTCTCTAATATAATTCTGCTGCCGAGTTTTAAATATTGTCTTGCTAGTCCCTTTTTGCCGTTTTGAT…
>DN38601_c1_g1_i1	len=587 path=[0:0-586]
GGCATGCCTAAAATTTACAAATTCATGTCTAATTGGATACTTCAAAAGTCAAAAGTTACACATTGAAGATAAAATATGTAGAGTAACAAATTTGTCCATTTAGGGGAGGAATAGCAATATTGTGTGTTGTGTTCATTTTTCATGAATCAAAACCATATTTAGGATCACTTATAAGTTATCCGATTATTCAATCACATGAGCAAAAAGTGCATGGAAATCTGCTGTCAAATACCAGGTTCAAAACTATAACATGAAATAAATTTAGTTGCTTTCACTCTGAATATGATAAATACAACTAAGACCCACTAATTGAAGCATACAAAATAATTTTACAGGATGGTACGGCCTAAGCTCTCTTGCAGGATTCGGGTCCAATAGATACAGGTTGCTTTTCCTAGT…
>DN38601_c0_g1_i1	len=387 path=[0:0-386]
AGAGTTATCTACTAACGTATCAGTATTCCTTGTCCTATCCTCCCATTGACATCTTCATCCACCATAATTTTAATCTATTTTTCTCTTCAGATCTCTGAAGTTCGGCCCCTCTTGAGTAGCAAGCAAAATAGAGCTTCTTTCTTCGTGCTTTCTTAAATTTATGACATCCCAAGAACATATTAGTTCTGCTTTCAAGTATTTGCACATAACATCACGTGTAAGAGAAAATGACTAGATGCAAAATTTAGGTTAAGATTTTCGTTCAGTTGAAAAACACTGGCTCTGCTGTCGAGCCTACTACAATTATTGGAGTTATTTGGAATATCTAACCTATGAAAAGTAACCTGCATCTGTTGGAACCAAATCCTGCAAGAGAGCTTAGGCCGG
>DN38699_c1_g1_i1	len=721 path=[0:0-720]
GTACGCTTTGCGCCTATTGTAAGCCTCGAAAGTTTCGGGTTCGAACTATGCCTGTGTCTGTTTTCTGCACCGTAAACGTCTAGACCGAGCAGCCGCTAGGGTTTAACCTAGAACGCCTTCCTCTTCCCCTGCCATTGGCATAATTACTTGTTAAGGATAGTTATTGTTGTTGACGCCTCTACCTTTGGCGAATGGTTGGTCTCTCTCAACCGTGGCTGGGTAGATCTACAAATCAAATGGTTTCTCACAACTTCCTCAACCTCAGAGCTCAGTTTTGACTCAATGGTGTTTACAGCGGCAGCGTAAGTCTGGTCATCTTCTTCTTCAACCAACGATTAGGGCGGATACAGTTTGGCAATTATGGCAGGCTTGATCTACTGCACCATCGGCTTCACCTCG…
>DN38649_c1_g1_i1	len=491 path=[0:0-490]
GCATTAGTATATTACTGAACAATGTTATATGCATAATATTTGTACCCCTACCCACCAGTGGGTAGGTGGTTCATTTTTCTTACCCACTGGAACCCTCTTGCCCTGTTTCTCATCCAGTTCCTGTTCTCCACACCATTTATTGTTTTCCTGTTTCTGGTAACAGATATAAGTCGTGTTGAAGCCCATGAGACTTGTTCTGAATTCCGTTCTTGATCATGTTCCTGGCTTGACACTGCATTAGTATATTACTGAACAATGTTATATGCATAATATTTGTACCCCTACCCACCAGTGGGTAGGTGGTTCATTTTTCTTACCCACTGGAACCCTCTTGCCCTGTTTCTCATCCAGTTCCTGTTCTCCACACCATTTATTGTTTTCCTGTTTCTGGTAACAGAT…
>DN38649_c0_g1_i1	len=422 path=[0:0-421]
ATATACTAATGCAGTGTCAAGCCACGAACAGGATCAAGAACGGAATTCAAACAGGTTACTATATCAGGTTTATGGTAGCATAGCTTTATACGCCTCAAGCGATGATGCGTGGACACAAACATAAGTAAAGGGAAAAAATGAACCTGGGTGCAGAGATGGACTTTGAAGAGACTGGGGTGAGTATAAACTTTTGTGCAGATTCATACTCCAAAAGTATACAGAAACAAGGCGAATGATATGACACTAATTCATGATTGTGAAGAGCAGATAAAAGCATAAATCTCACTACAAATTCTCATTAATTACTGGAGCGAGTATAAACTTTTGTGCAGATGCATACTCCAAAAGGAAACAGAAACGAGGCGAATGATATGATACTAATTCATGATTGTGAAAAGT…
>DN38655_c0_g1_i1	len=610 path=[0:0-609]
ATATTATGATGTAAAGGCTGCATGTAATGTGAAAGCTGTCAACCCCTAAATGGTTGCATAAAAATTATGGTAAATATATGAAAGTGGAAAGCTCCCTGCAATTCAGGCAACATAGCAGCACATTCATTGTGGTGGCAGGCTAGCCCATAGAGTTACAATGGAGAAATGTTTAGGTTATGAGATCTTTCTTGCATGCTTGAGCTAGTTGGCAACTGGAGAAAACCATCCTTCGCAAAAAATGAACTTGAACTTGGCACCACTGGTGTTTGAGGTTTGATAACTGAACTGTTGTTGGGGTAAATCCAAATTGCTGGAAGGTGTTGCAGCACAAAATGGGAAAAATATTCAAGCTCCATAAGTGATGGTATGTAGCTTATTTCTGGTGTGAAAACTTTGAGC…
>DN46408_c0_g1_i1	len=595 path=[0:0-594]
CCTTTCTTTCTTTGAACTTTCTGCCCAATTCCACGCTAAGATTCTCCTGGAATAATTACCACTTCCAACGCCAGTTCCACTTGTAGCTGATCTTTATCTGAATCTGAACTTCGGTATTCCCGTATCCATGAGCTCTCTTTATTCCCACAACTCCTTCAGCTTGACTGACCATCTTATTGGAAGGGATACTATTCAGCACAGAAATCATTTGTTTGACCTCAAGAGGAACTTTTGTATATGCAGGCAAGAAAAGTGCTTCTAAAACTTCGGTTAAATTTTAAAAAGGTGGAACCACATCCATTATGCAGCCTGTAAAGGGTAATTTTATAGTAATCGCAAGTTCATACGCCAAGCTGTGTGCAACATGGACATGCAAATCTGTTTCCAGAGTTGTAAAAT…
>DN46414_c1_g1_i1	len=298 path=[0:0-297]
ATTAAATCTATGGTAACTGGATCAAGAAAGTAAGACAAGTCATATTTGAGATTTGAAATCAAGAACCTTGCTTCTCGGGGCAATGATATGGATCGAAGTTGCAAGCTTAAAAGGACTGTTAAAAACTTAAAAGAACCTCAGATTTTGGAAAAAATGGATCAAATTACATAAATTTGTTGCATGAGATCAAAGCAGAAGAGAATTTCTGTGATTTTATTCAGCACATATGGATTTGCCATTGTTCAATTACGTCCAATGAGAACAGATCAACTTACTTCATCCAAGCTCCTAGGGCATG
>DN46416_c1_g1_i1	len=287 path=[0:0-286]
GGCTAATCGAAAAAAGAAATGAATACAAAAGAATTATCAATTTCTATTCCTCTGAAACCCCAATATAAATGTACTTGACTTTTAGGAAAAGGAAAGCCTTCTACATAGAAACTGTTGGAACTTTTCCTAGTGACTACATAATTATCGATTGGGAAATATCATTAATCTAAATATTTCCAAGTCAAGAATAAAAGCTAATACCATGATCTTTAATCAATGGACAATTAGATAATTATGCCCAAAATTTTATCTGCACCAGAACACTGGAATTGACGAATTTATAGCTT
>DN46416_c0_g1_i1	len=1092 path=[0:0-1091]
GTGCGAAATTATGAAACTATAATCAAACATATATCTAATTACTTATTTATGTTATATAAGAATCAATTTGAAACCTTACAAATCCAAAATGACTGTATGAGACCTTAGAAGAGCATATGGCTTTCTAGTTTTCCCAACAAGGCTTTCATTTCTTTATGTAAATAGAGACCAGAGAAATAAAGAAGAGAGAAATCAAACATGAAATCTAGATAAAATACACATTAACCATTCTGAAAAATCTAAAAAGCAAGTAAAACATTCCAAATCATTATACAGAGAAACAATCTAACAGTGAGGAAAAATACTCATCGAACACACACCTGGAATTGACGAATTTATAGCTTTCTCCCTCTTGGGCAAAAAATTATAAGTCGCTTGAGCATCATAGAGCACCCAGAT…
>DN46432_c1_g1_i1	len=854 path=[0:0-853]
GGACGCAGCCCAAAAAGCTCAACCTGAAACCTCACTCGATACGAGAGACAGATTAGAAACCCAGCCATTAGCTATTAAACTAATAGCAACCAAAGGGAAAAGAAAAACTATCAAGTATCTCTTGAAGAAAAAATTATGATCCTTGGTTAAGATGGATAGCGAAGAAGATAGATATACCCTTTGCTAGTTTTCATTTTTTTCTCAGACATTTACTAACATCTCATCAATGAAGGCTGTAAGAGCACCTCCTTTCTCCCACTGTAAACATAGAGTTACTGTACAGGTTACAGTTTCCAACAGTTCCTCTAGTATTCAATGCGGATCATGATTACTTACATGGAACTTTCAATTCTGGATCAGTGTGACCACACAAAGGGAATATTACTACATCTAATAGTA…
>DN46496_c0_g1_i1	len=876 path=[0:0-875]
GGGTTTCTTAATCTTTGTCTCCCTCTTGCTCATTCAATGGATCCTCTCGGTCATTTATTTTATGCTTCTTTTGTTTTCCATTTGTCTTTTGTTGCTCTCTCTTCCTTCTACACAATGTGGCTTTAGCTTCCAGGGTTATACTTTCTTGGGATTCATCTGCTTGTTCATCCTCATGCTCCTATTGTTCACTTGGTCCTATTTCCCTAGTCGCATTAGAACAGATTCTAACTTTGTCTTCATGCCTTTCCCTTGTATGAATGTACGACCAATTGAAACCTACCCTTTTATAATGAAATTATATGATTTCCTTTGGGTTGTAGCTGCGGTGGTTCAAATGTACGAAATAGAAACCTTTCATCTCCTCCGCCTCTTTTTCAGCCTCCTTGAAGTTCTCTAGGG…
>DN46436_c1_g1_i1	len=780 path=[0:0-346 2:347-779]
GTGGGCTTATAAGGCCGAACCACTTGTGCATTGACAATGGTTTATGAGGCCGAATCTCTTGTGCATTGAAAGCGGTTTATGAGGCCAAATTATTGCAAAATCCAGGAGGGCCAAATACTTGAAGAACTGATAGACTGGTTCCAGATTTAATATCCAGTGGGCTGCAAAAGCCAGCCCAATGGAAACATTTGTTTGAAGAAGTTATAATTTTGATCTAAATAGCTAGAAGGCTTGCTTGGTACATTACAAAACATTTAAGAAAAAGGCCCTTATAGATCAATCAAGCAATGAAGATGCCAAAGGTAACAAAAATGTACCAGTTACGAGAAATATTGCCTCTGCCTTACCTCGTCCTTTAAAATCTGAGATTTCTGAACTTGATCTGTTACGCTTCTAGAA…
>DN46474_c0_g1_i1	len=622 path=[0:0-621]
GTCAGAACACTAGCCTTTTACAAAAGCATAAAAGTAGATCAATGACCATCATATCGTCAATATATTTGCTGCAAGTCTGGACTCCAAATTGGGTAACCCTCATATGGAGTTTGGATTCTCTGCAAAAGCAGAGTAGGTATAACCAACCCTTCTAACTCAGGTCAGTACCTTACTTACAACTCCCTGTTCAACTCGTTTGTAACTCACTCAACCATTAGGAAAATAGGAAACAAAAAGGAAAATGCAATCATGTTAACGATAGTGATAACTGAAACTTGGTACTGCTCCTGGTTCCCCAAATGTGCAAAATCCACTAATGATGTTATTGAAGAGTCTTTATGCACGAGCTTCTAACATTACGGCACATAGATCAGAAGTTAGAACAAATGAAAAAAAAAA…
>DN46439_c0_g1_i1	len=436 path=[0:0-435]
CTAAGCAAGTTGTATAGCTGTTTATTTCCTTTTTAGGTGGCTTTCATTCTCAATCTCTTAATGTATATGATATGAGATAGAGACCTTACTGGATTTAATGTATATAACATGAGATAGAGACATTACTTATATATGAGATAGAGACATTACTTGACTCGCTAAGCAAGATGTATAGCTGTTTGAAATTTGTCAGAGTGAAAATTGAAGACCCTGTCGAAGGCACAGAATCTACCAATACTGCTTTCAGATTACAATCAAGTGTTACAGCAATTACAAAATACAGCTAGGTTTTCAAGCAGTTGCAAAATTAAAGGGAAAGTGTAAGACGATGGAGACAAATTTTACGAACTTTTCATATGAGGGAAAAGTGTAAGACGATGGAGACAAATTTTACGAACT…
>DN46440_c1_g1_i1	len=3547 path=[0:0-198 1:199-3518 2:3519-3546]
GTCATATAACAAAATTGAAATTCAACATAGAACCGAGATTCAACATACAATCTGAAAATAAGGCCCCAAGTAACCTGTAAAGTGTGATTAGAGACAATTAGAGTTAGCCCTCCTGTCATATAACAAAATTGAAATTCAACATAGAACCGAGATTCAACATACAATCTGAAAATAAGGCCCCAAGTAACCTGTAAAGTGTAATTAACATGCTTCCTATAAATTTTAAGAAGAAATAAAATAGTTATTTTTTCTTTCTAATATTATTATATTCCCATTCAAACAACACAGATCTATGGAACTATGATAAAAGTTAAGCAGTCCTGCTCTTCGTTCTCATGTTTCCACTAGCAAATATTCTAGCTTAAAGTCATTTAAATAAATATGCTGATGTTGACTATA…
>DN46440_c1_g1_i2	len=227 path=[0:0-198 2:199-226]
GTCATATAACAAAATTGAAATTCAACATAGAACCGAGATTCAACATACAATCTGAAAATAAGGCCCCAAGTAACCTGTAAAGTGTGATTAGAGACAATTAGAGTTAGCCCTCCTGTCATATAACAAAATTGAAATTCAACATAGAACCGAGATTCAACATACAATCTGAAAATAAGGCCCCAAGTAACCTGTAAAGTGTGATTAGAGACAATTAGAGTTAGCCCTCC
>DN46440_c0_g2_i2	len=1692 path=[0:0-1020 2:1021-1691]
GGCTCAGATTCTTAAAGATAGCTAAAAACCCATTTGGGGCGAATTAGACTAGAACCACAACCACTGCAACAAATTGCCTAAGTTAATGAATTATCTGACCAACAAACCACACATTGAGGAGTTGGAACCACACATCGAGGAACCAACTCCTCTGGTAAAAAAATTATTTTCTTGGACCTCTCGATCAAAGAGTATTAAAAGTATTACGGATGTCCCTGCATCACAAATGGATTATTTTCAATGGAAAACTAGATTCGTTCTTATCCTCGTGTTTTAATAAAAGTACAACCTTCATTGCAATTTCTTTTAGTAAAAGTAAAAACTTCATTGCAATTTTTCAACAAATTAGAAGCCTCTACTACTTTTCATTGTTTTTCAAGTTCAAACTCCAGCAAAACA…
>DN46472_c0_g1_i4	len=713 path=[0:0-408 1:409-582 3:583-638 4:639-661 6:662-712]
AATTCTGGTGTTCGCAATGGCAATTATGATGTTCTGGGGTTTGATTTGTGTTGGTTGCTTCAATATCAATAGTTGCATAGTCAGACATTTCATTCTGGCAAAACCAAGCAGCTCAATGTCATGGGAAATAACATACTTTCACTCCGGCTTGGAAGTGGAGGAGTCATACATCCTCAAGCAGTTGACAGAGGGCAATGTAATTGGATCAGGAGGTGCTGGAAAAGTGTACAAGGCCAGTCTCAGGAATGGGCAGGAGGTGGCTGTTAAGAAGATTTCGAAGAGGAGAAATGAATTTGAAGCAGAGGTTGAGACCCTGGGCGTGATTAGGCATGCCAACATCCTAAAGCTCCTGTTTTGCATCTCAAGTGCAGAAGCAGATTTCAAGTTATTGGTATTTGA…
>DN46472_c0_g3_i1	len=268 path=[0:0-267]
GGGTGGTGCTGCTGGAGCTTGTAAGTGGAAAGAGAGCCACGGGAGAGACAGAATATGGGGAAAGCCTTGACATCGTGGGGTGGATCCTCAGCAAAATAAGTCGTCAGAGAGAGGAGGTGGCGCTGTTGGGAGTACTAGACCGACGAATTACAGAAGGTGAAGACGACAGAACCAGTGATTATACAGAGAAAATGTTGGGTATGTTAGCAGTTGGTTTGCGCTGCACCAACAGCGTGCCAAATCGTCGGCCTTCCATGAAACAAGTTTT
>DN46493_c1_g1_i1	len=206 path=[0:0-205]
TGTCAACTTTAATCAAATAACAACGAGCAGCTAATCGATGCATGGCAAATGCAAATCTGAAAAGGAAGATCCTTTATGTTCAAAGGCCAGGTCTTCACTCGTTATCATTTATAAATTAATACGTGATGTACAATTTTTTTTTATTGATAGGGTAAAGCCGAAGTTGTTTTCGCTGGCATTGACCGGAGGAACAATTTAGCCAAAAA
>DN46462_c0_g1_i1	len=341 path=[0:0-340]
TTCAAAGACATTTCATGGCACAGGCTGCTACTTTTCATTCTATCAGGACAATTCTAAGATTTGTTGCACTGAAATGGCGAAGTTAACGTGGAATACGATACTAAGTCATATGATTTGACAATCTTTAGCCGGATGCACTTCTGGCTGACATAAGCTTGTGTCGGGGGTGTCTTGAATATTTCCTGTTATTTGTTGGCTTGTTATGATCCCATGGTGTCCAAAGGCTTCGTGTCCAAAGGCTTCTTTTGTCTGTTACAGTTTACTCTTGTTAGATACTTTTATTTACTAATAAACAGAGTCATATGATTTGACAATCTGCAGCCGGATGCACTTCTGGCTGA
>DN46469_c0_g1_i1	len=205 path=[0:0-204]
AGACAAATATGGGTTTTCTTGTTATTGTTGGTTTTGTGTATGACTGCTTCTATGGCTGTTGCAACGCATATCAATTATTCAATGTGGAAGCCATATTCTTGTCATCTACGTCATTTTGTTTTTGAATGCATGGTGGAAGAAAGACTATCATCAATAAATGCGCACGATGAATGGGACTTTGATGCTTTCTTGTCGTTCATAAAGT
>DN46484_c0_g1_i1	len=398 path=[0:0-223 1:224-266 3:267-290 5:291-312 6:313-355 7:356-397]
TAAGCCATGTGAAAAACTCTGAGAACGATGTCAGGCTTTCTGATGGATTTAGTGTTGCCATTGATAGGCAATTCAAGAAATCGGCTTCGGCGCCTCTCGTAGCACCAAGTAATGTTGTATTCTGTGATGGTTATAATCGATGTGCTTTCTTGACTGCAGATTACAGGGCTTCAAGAGTTTCTACAAGGCCCGAGTGGAAAACTCTGAAAGGAACTCATGAACTTTGAAGTCAAATGATAGCTGGTTGAAGGACGACCATTTGAACTTCTGCAAAATGAGCAATAAGGATTTTGTCTCTCTGTTGCAGCATGGTAAATTTCCAAGATATGATGAATACTGCAATTTCATGAAAACTCATGAACTTTGAAGTCAAATGATAGCTGGTTGAAGGACGACCA
>DN46484_c0_g1_i3	len=357 path=[0:0-223 2:224-267 3:268-291 4:292-313 6:314-356]
TAAGCCATGTGAAAAACTCTGAGAACGATGTCAGGCTTTCTGATGGATTTAGTGTTGCCATTGATAGGCAATTCAAGAAATCGGCTTCGGCGCCTCTCGTAGCACCAAGTAATGTTGTATTCTGTGATGGTTATAATCGATGTGCTTTCTTGACTGCAGATTACAGGGCTTCAAGAGTTTCTACAAGGCCCGAGTGGAAAACTCTGAAAGGAACTCATGAACTTCGAAGTCAAATCGACAGCTGGTCGAAGGACGGCGATTTGAACTACTGCAAAATGAGCAATAAGGATTTCGTCTCTCTGCTGCGGCATGGCAAATTTCCAAGATATGATGAATACTGCAATTTCATGAAAACTC
>DN46441_c0_g1_i1	len=283 path=[1:0-81 2:82-150 4:151-176 5:177-282]
TATATAGCCTTCTATATAAAAATCATTCACAGTAAAGTTTTCTTAGCTGTTATGCACAACCGATATAGATACCTTCCCCCTCTTGGTGTCTTGGTTTTTTACTAAGAGACTATGCTGGATCTTCTTTTTTCCTGGTCATCATTTTGATTTCAATCCAGCTTGGATAAAACCTTTGACCAGAATTCTATTATGTGAAAAAGCATGGGCGTATTGTTACTTTTTGATATTGGACGAAATTGAATGTATTTCCAGTTTAGGGAGGGAATAAACTCTGTTGCCCCAG
>DN46441_c0_g1_i2	len=221 path=[0:0-19 2:20-88 3:89-114 5:115-220]
TCAGGGTTATTTAATTCCTGTTGGTGTCTTGGTTTTTTACTAAGAGACTATGCTGGATCTTCTTTTTTCCTGGTCATCATTTTGATTTCTATCTGGCTAGGATAAAATCTTTGATCAGAATTCTATTATGTGAAAAAGCATGGGCGTATTGTTACTTTTTGATATTGGACGAAATTGAATGTATTTCCAGTTTAGGGAGGGAATAAACTCTGTTGCCCCAG
>DN46420_c1_g1_i1	len=414 path=[0:0-413]
AAAGTATCACTCTTTGGTGGTGAGGTGAGCTTAATATCTTTCCTTCTTGACAACGTTGTACAGCACTTGCCATCCCGGGGAACTTATTGTGATGCCCAAACAGGATTTTATCTTTTTCAAGAAGCTTGCAAAACCTGATTTTTGTAAACGCTAATATGAACTCTAGAATTCACAAGATTGCTAAGCTAATTTCAACTTTATCTTATAGGTTGATTCATTGTTATACGTGGATTTGATTGATTCTGACATTGCTAGGGGATGTTTTCTACCTGTGTTTTTTTGTAATACAGAAATTACTTATTGACTGAAGAAGACAGTAATTACTAATGATTGAAATACCATCTAGCTATCATAGACAAAATGTATAACATGACTCTTTGTTGTCATTTCAGATTCAAC…
>DN46413_c0_g1_i1	len=438 path=[0:0-437]
TCTAACTTTCAGAGTTATTACTTTCCTATACTGACTCGCATTCTTCTCTCCTGTCAATCGTCTCTGTTGAGAGTGAACTTCGTTCTCACATCGTACCGTTCTGTTTACCCAAATAATTATGATGAAGAGTTGTATATTGTCTCCCGTTGTTATGATCTTCTTCCTGCTCATTGCAGGCTGTAGCTGCGGCAGATTACTACCGAGGATTGCTGCACCCGACAATCCTTCGGCTTTCTATACCGAGAACACCAGGTTATTGTCTAGGGATAGCCCAAGTGATGAAAAAATGTTGAAAATTGAACTTTCGACATCGAACAAGGTTGATGGCGAATTAAATTTACTACCGAAGGGCGCAGAAACACCATCAGGGCACCGTCCCAATGTAATTTCCGTAGTGCC…
>DN46424_c0_g1_i1	len=613 path=[0:0-612]
AAATCTGTGTTCCATTAAATATGTATTGTCATTCAGTGTGTGTAATAGATACTCCTCCCTGGTAAGTCATGTGCTTAGACATTTTAACGAAGATAAATCTCTTTCGTATCCCTTTCTTCATGTCCAATCTGATCAGAGTTTTACTTTTTGTTGCTTCCGTTTGAAAATGGTGGTGATAGATGATAATAATAACATAAATGCTCTTCCTCTTAAATAAAACTTTGTTCAGTTTTAAAATGTTGGTAACACCATTGGTGTTGTGAATTTTGTTGGGAGATTGCTTTCGGCGATGCAGTTCTCTTGTGGACTGTAGCCTGGTATGTGATGATATGGTTTTGACTTGTTGACAACTCGTCATGTGCAACAAGACCATTACTGACACTAAAACCAGAGACTTCC…
>DN24276_c0_g1_i1	len=509 path=[0:0-508]
GTACTGAAAAAATCAAGCCCACAGTTTAAGTATTTTGCAATCAAATACTCCCACATCTCATATTGACCCAATAAAATACTAATTAATCAGGAATTCAATGGCACAGCATGCAGGAGCCAATTCCATCCACAGGCAAGATTGACTTAAGTCAAAGATTAGCTATAGAACTATGAACATAATTACTGAAATTGTAAGAAAAGCACTGTAAGCAAAATCGTAAGTGGATAGACCATGGTGATTGATTATAAGTTGCCATTGCAGACCTCCTAAGTCACAGTAACAACTAAGGAGTTATGTTTGAGCTTCCAGCATCCCCAGTTCAAAATTATTAAAAAACTGAAAACTACCCACAGAAAAACAGGGCATTTAATTATGAAAATACAGGACAAATCAGATGGC…
>DN24270_c0_g1_i1	len=507 path=[0:0-506]
CTGTAAACCTCCGTCGCCATCACAGAGCCAAGATGCAATTTCCCAAACCGAGTGAGATAATCTCACTTCTCATTCTTACACAGACTAGTCTGTCAAAGACCCTGTAAGTAGCATTGCCATACAACAGATTGTGGTTCAACCAAGCTAAGATCTGATGCCTCCCAAATATGATAATGGCCACTCCACTGTTTAATAACCTAATCCAAATATATGTGGTCCTTGGAGCGTAGAAAATCAATAGTTTCCTCTGGGATGCTGATAGGGGGTCAAACACCAATTAAATGATTGACACCAATCAAAATTTGATTTCCTTTACCAGAGGACCATCTGAGTAAGTGTAAGTACCACCTTTTGACCTTGTGGAAGCTTAGCCAAATATTAGATCCCAATCTAACACCA…
>DN24223_c0_g2_i1	len=423 path=[0:0-422]
AATAACTTTAAGAATGACTTTTTTTCAGAAAGAAAAAGCTTCATTGTATTATTTTGAGTCAATATAGAAGCTCCAGATGATACAAAAAAGTGGTGCAAATAGATGCAGCCATGATTAGAAACACCGAGGTCAGATACAACATCGCAGATCCATAAAAAAACATCAGAAAAAACAAATAAACAGTCATCTGTACATCACTTGCCGGATCATATCAGATTTGAAACTGAGATTTTTAGAGGATGCAGGACAGCCATAAATCATGTCAAATGCAAAAAAAAAAGATAATGACAAAGAACCTGTCTATAACCAAAGGAACTTCAAGATCCAGGGATAAAGAAATCCTGGATAAAACAGGAATTCTCTCCCTCTTTTACTTCCATAGACCATGACCCTGTACCT…
>DN24235_c0_g1_i1	len=317 path=[0:0-316]
GTAATGCAAATTACAAGTTAGCTTGAGAGAGGATCCACGTGGTAAATCCAATGTGTCAATAGTGCTAGATGGGAACATCATATTCTTTAGGTAATTGAGTAGATATGTACACTATATATTGCCATCTCTATGTCTTGTTTTGTGTGTGGGAACTTGCTATGGACAATGATATAAGATCCAGGTTTGTAAATATCTATGTGGAGAGTAAATGGGGAGCGAAGATGGTTAATATCTATCTCACAACATGTAGTTATGAAGACCAAGTTCATGAGAGTTGTATAAGAGCTAGTTATGAAGTTAATGAGAGTTGTATGAGA
>DN24239_c0_g1_i1	len=221 path=[0:0-220]
TAGAGTAAATTCAAAGGTCTTTTGTTATGTTGTTGTAGACTGGTTGAACTTGTTTTCTGTTGGGATTAGGTGTAGGTTGGGTAGGCAACTATGGTTGCCTCAGAGGATGTTGGCTGCTAGGCTATTGGGAGGTGAGAAAAAAGCTTGTTTTTGCTTAAATGGCAAGCTTTGTTGATGCCTCTATGGTTGTTAGTTTGGGCATTGGTGAGTGTGGAATTGGG
>DN24232_c0_g1_i1	len=243 path=[0:0-158 1:159-242]
AATGCTTTTGTGAATGATCCTCCCAAGATTTTATATACTATGGTGCAAAAAGTGAGTTCTATTCAAAGAACTCTATGGAATCATTACAATTTCAAAGTTCTTCAAAGTTTGTTTTGTTTTCCAAATGATTAGATCTAACATTGTATTATAGAGATAGTATAGTAATATTAGTATTAAGGGTGGCTGTAAATTCAAGAACATTATAAACATAATATAGTAACATTAATATAACATTGTATTATA
>DN24232_c0_g1_i2	len=317 path=[0:0-158 2:159-316]
AATGCTTTTGTGAATGATCCTCCCAAGATTTTATATACTATGGTGCAAAAAGTGAGTTCTATTCAAAGAACTCTATGGAATCATTACAATTTCAAAGTTCTTCAAAGTTTGTTTTGTTTTCCAAATGATTAGATCTAACATTGTATTATAGAGATAGTAATGCTTTTGTGAATGATCCTCCCAAGATTTTATATACTATGGTGCAAAAAGTGAGTTCTATTCAAAGAACTCTATGGAATCATTACAATTTCAAAGTTCTTCAAAGTTTGTTTTGTTTTCCAAATGATTAGATCTAACATTGTATTATAGAGATAGTA
>DN24298_c0_g1_i2	len=540 path=[0:0-519 1:520-539]
AGCTCTCACAATAAAACTTCATAAAGTTCATTTGTCTAGACAACAAAGTTGTTTCAAATTTCAAAGACTAGTTTCTGATAATGAGTTCCAACCTTCCAAATCTGACACCTAAACAGGGTGGGACTGCCCTCCTTTCAGGGCATAGACAAATGAACTAATCTTTTCATAGAGGGATCAATGTGGAGCATATCCCTGCATATAGCATTCCCCAAGTCATGGAGATACCTATGTTTCTCACTAGCTCAAAATCCAAATATGAAAATGATAATCTTCGAAAATCAGGATTGTTATCTCCAGTGCAAGCATAGCGGCATTGAACTCCAAATTAACAACAGATGCAAATAGACACAATCAAGCAGCCCCAGCGTTAACGCAATTGGTTGAAACATCTGCCCAAGG…
>DN24233_c0_g1_i3	len=609 path=[0:0-608]
TTTTGTTCATTTAGTTATTATACTCTGATAAATAACCATGATTTGTGCTTAAAATGAGTACAATTAAAAGAGTTTGGGGAGAGTGTGAGGATTCAATTCAATTCTTGGGAAGGCTTATTTTATGGATTGTCTTTGTTAAATCTTTGCTCGATATATAAGGTTCTTGCTGACATTTTCTGGGTGATTTTGGTGGGTACAATCTACGATGCATGAGCTTTTAATTATTACAATGCTTGCTTTAGCCATATCTTCTTTCTGAACAGTATTGCTGCTAGGATTCATATGATGAATGGAGCTGATGGAGAGAGTGTAGGCACATCTTATGGAGCAAATTGTTGATTGAAAATGTTATCCCTTCTGGTTATTGAAAATGTTTATGAATCAGATCATGAGTATCAA…
>DN24217_c0_g1_i1	len=204 path=[0:0-203]
GTCTTTTTACATGTTATTTCTTCATTGATACGCGGAAATTTGATTTCAGCGCTCTCCAGTTGCATAAAACTAAAATCCCATTGAAAGATACTGTGCAGTATGAGAAACCATGGCACATCACCATATAATTATTACCACAAATGCAAGTATGAAGAAAAATAAGGCAACATCTTCCTCAAGCAAAAGAGCAAGTCATTTGTATTA
>DN24231_c0_g1_i1	len=255 path=[0:0-254]
GCTGGGTATTCCAGAAGAGTGGATCATGTTACCCATGCCTTCTGATTTTCCTTCCAGATTGGAAAATTGTAAAGCTTCTTGTGAAAAGGTATTACCCTCAATAGGATCCTTCTGCATTGAATCGAAACCCTGAGTCATATCCTTCTGGAAGCCATTCAACCATCCTGACGTTTGGGGGTGGAGTAATTGATCCATTGAAATGGAAGGAAGTACCAATGAGTTCTCAGAGGATGGGCGTGCCCAAACCTTAGCCAT
>DN24289_c0_g1_i1	len=352 path=[0:0-351]
TCAATAAGAACAAGTTTGCAGACAAACTTGCCAATTTTTCATTTTTATGGATTCTCAGTCATTTATTCCTTTGCATATCCATGAAAAGGCTTTCATGCACATATTATGCCCCATGGTGAAAGACGAAGGATCAAGTTGTGTTTTAATTAACATTAAAACCTAGACCTAAGGAAAATAACAACAGACCTGTTTCAGCTAACACTTTATTCCTAATTCTTTCAATTATCTTTCAATAAGAACAAGTTTGCAGACAAACTTGCCAATTTTTCATTTTTATGGATTCTCAGTCATTTATTCCTTTGCATATCCATGAAAAGGCTTTCATGCACATATTATGCCCCATGGTGAAAGA
>DN24234_c0_g1_i1	len=682 path=[0:0-681]
GCAAATACTAGGTTTGTGGCAAAGAAAACTTTGGGTAATGGGAGCTTACAGATTGTATATGTTTTCTGACAGGCAATGTTGAGTCAGAAACTGCCAGACCTATGAACGATGGGCAATGCCTGCATGCACAGATAGACAAGCTTGATCAAGCAAAAATTTGTCAGCTTAAATGAGAAGAGAATGTCAAATTTCCCGTGCTCTATTTTTATCTGGTCACTTTCTGTATCAGCATCGAAGTTTCCGGATTTAATGTCGAAAGAGAAGACAACAAATCATCCAGATGTGCAAGAGTTTGAAATTGAGACTAGGTGAATCACGGTGATAGTGGAACTAGAGAAAATGCAGGTAAATTCGTATCATGGTTTCTTGTTACAGCTTGGTATGATCGCCATGGAAGAA…
>DN83262_c0_g1_i1	len=328 path=[0:0-327]
GTGATCTATGACCCAAAATCTGCCTTATGTAGAGAGCTAGACATTTCTGATTTGGATAACAAATGAATGTGGAGAGGATGCCCCTAGAGTCCCAATAAAAGCAGTAACACGTCCCTCTGATCTTATAGTATATAGGGAACCTAAGAAGAAGATGTTTCTCTCACTCAGTCTCTAGTACGTGGTGTCACTCGCAAGTCCATTGGGCCATGGATGATGGGATGAGGTGATTAGTCTCAATCCTAACGGACAAGAGCCTACTCAGAACTAACCAAAGGGAGATGGGGGAGTCAATGCAGATTTTTATTGAAAGGGAGTCAATTGTACATTT
>DN83290_c0_g1_i1	len=494 path=[0:0-493]
TGTCAGGGGAAGATATGGACAGGACGTAAACCGAATTCGATGACATAAACCAAACATTTTCAATACGTGTCTTTCTTCCATATCCATGACGAAGAAATCGTGAGGGGCGTGCTTAGACCTCCACACGGATATGGTAGGAAGGAGCTCAGCGGAGGCGATACAGGGAGCGGCATCTACACAATTTGGAGTAGATAGACTCATAAAGATCGGGGCAACCATGAATGCTCTGAGATGGCAGCGGTAGTGAAGTGTCTCAATGAATTACTGTAACAGCATCAACAATTCTGGTAGGAGTGAAGAATCTGAGACGAATACGACGATGCAGCAGGAGGATCTGATCCCAAGACGAGAAGAATTAGCAGCTACTCTCAACTCTAAGACTTTGAGAAGGACAAGTTA…
>DN83259_c0_g1_i1	len=368 path=[0:0-367]
TTTCTGTTTGACACGATAATGCTTTTTGCTTATTATATATATGTAGCAGGCTTTTTGGCTTTTGGTAAGTAACCGTTGCATGGTTATGCCTGTGGCTCCTCTCTCGACCTCCCGTTTATTTAAACACTTTCCATTCATCACCCTCCCATACTTTCTCAATTCCAATATCGATGGAGGTGTGCAACCAGCCTCCTCTCGTTCTTTCATTTAAACTTCTAAATTCTTATTTCAAATTTCTAAATTCCTTTTTATTTTGTTGTTGTGGACGTCCATTTCATTTTTGCTTTCGAAGATTTCTTTGGCTTCTTGATTATTACACTTCTTTATGGCTTCTGATTTTTACACTTCTTTATGTTTCTATGGGATTG
>DN83251_c0_g1_i1	len=230 path=[0:0-229]
GCGCTAGCTGATCCTCAGTATCTTTTCTTGGATTTTCCTTATTTGAGTCTGAGCTTTCCGATGCATGATGACGTTTGTAGCCCCTAGCTCCTTTGCTTCTGGAATCCTCTCTGTCTGCATTGATGGTTCTGGCAGTTTTGATACTGTGTGATTTGATTCCTCCTTTCTTGTATTTTCATGTGGATGCTGAACTTCTTCATTGGTAAAGGGTTCAATTTCTTCTTCATCCA
>DN83266_c0_g1_i1	len=251 path=[0:0-250]
AGGTAATAGTATTCTGTGAAGCAAAACAGAACTCTCCTTTCAGTCTTTGGATGGACCCAAAACACTGGCCAATTTCCCTCCCCCCTGCCAAAAGGGAAATGTTTAGATCTGAATTAAATTAGAGAAGAAATGTCCAGGTATTGGTCCGTCATAAACTGAGATGAGGCTTCAGAGGCAAACACAATGTGAAGGAAGAAACTTTAAGAGAGCTAGATAGAGAGGGAGACATGTAAAGATAAGATTTGGAACAT
>DN83233_c0_g1_i1	len=234 path=[0:0-233]
TGGCTATTATTGCTGGTTGTAGTCACTAGCCCCTTTGACCTGCTTAGGTCTTCAGAGGACATTAATAATAATACTGATTTCAATTTCAATTATAACCTGAACTGCACATGGGTTTGGAAACATCAATTTATGTTGAGATAACTTTGAAATGTAACTTCTCATGCATTATTTATGGTTCTGATACCTGACATTTATGGGAGATTTTGGAGTTGTAATTTAATGGTTTTGAGAAAG
>DN83246_c0_g1_i1	len=218 path=[0:0-217]
GGGAACTGCCGAGAAAAAACCATAAGAAATATATGATCCAGGTAGAGGACCGAGTTCACTACCAGTTCTATTATTTCATCGCACACACTATTATCCCTAAACTTGTGTCTGTATCAGAGCCTGCGCTATACCTCGAATAACAAAATAGCGAAATACACCTTCAATGTAACTTACCTGTGCTTTTTATTTGTTAATGACGACTTTGAAATTAGAAAGAG
>DN83207_c0_g1_i1	len=465 path=[0:0-464]
ACCTTTTTTTGTTCTTTGGGAAGATTTCTAATTGATTAATTGCCTGAAGTTATATTGGATGTGCATGAGTGATGTGTTGATTTATTGGTGGAAGAAACGCTGGAAGCTTGTGGAGTTCTGTTTGGTTGGTAAAGTGCCTTTGCATTTTCACTAGAGCGTTGGTTTTGGCAATGTTAGCAAGTAGCCCAAGCTTGGAAACAGATCTCAGAAACATAGCCATTTTTGTATGATTGTTGATGATTAACAGCAGATACTTTTTCACTCAGAATTGCACCAAGAATAGAGAACTTGTTTATTTCTGTAGAGGATCTGTGTTGATGAGATGGACAGGCCATAGGCCTACCATTTACAATTATTTATGGAGACTGAGGATGGAATCTTAAGTGGGTTTCAAGAGTT…
>DN83254_c0_g1_i1	len=355 path=[0:0-354]
AGGATAAGTTGGATATTTGGCTTCTGATCAATGGATCTCTGCATTTGAGAAGAGCAGGGTTCATTGGCATTGTTTTAAGTAGTTCCGGATATCATGCCTCAGCATGCTCTAGCATACCTCAGACTTCGGCTCTCTTCAATGCAACAGTAATGGCGGATCGCAGATCGATAACTAACAACATGCGATGGCAATCAGATCATATCGCAATTTTGGCAGATCGCAGAATGGGGAGACCTAAGGGCAAGGCCTTAACTAATCGCGATATGCGGATGTGATCAGATCGCATCGACGGAAACCAAGGGGCGGAGCCTCCACACTTTCTCATGTGTGATGCGATGACGTGGCCCCGACGACG
>DN83244_c0_g1_i1	len=556 path=[0:0-555]
TTACCATGCATAAAGTTGTAATTCTGATTTCTATGCTTGTGGTTTAGAATACATGTCATGTTTACTGGTGTTGCTAATTGTCTAGTTCAGTTGATGTCTATGAATTGTAAACACCTGGCAGAGTATGGTATTAGCTTGTCAATGCAGTGGTATTAGCTTTTCAAAATGCAGTGAAATTTTGAACTTAATAATGAGTATTGCCAATATTTAGTTTACATAAAATTACTTACCTCAAGATTCAGGACAGAATTGTAGGATTTATGACTTGTAGACTAGTGTTATCAGAACTGGTACCAAATCCAAAACACTGGCCACCAAACATGCAAATTCTGCTCATGGATATAGTATGATAGAGTGAAAATAGCAAATGGGCCCAAGATATAAGTTGTGGTACATGTA…
>DN83263_c0_g1_i1	len=227 path=[0:0-226]
ACATTTTGGTGCTCAACCTGCCTACTTATGTTGATGACTTGACTCTTTTTGCACATCCTGCCTCCTCCTGATGATGTCTCGACTCTTATTGCACATCCCGCCTCTTCAAAATAGTCTCCAGAAGGATGTTTATTCCTCCAGTGGCTCCAATTTAATGACAAGAATGTCTTTGGGTTGGGGACTTCCCATCCTCAAACTTCAATAGTTCCGGCACACCTGAGCTGCAG
>DN83227_c0_g1_i1	len=217 path=[0:0-216]
TGGATTGATCACCTTTGGGAATTGCTAGTTATATGTCATTGAGTGATCTAGCTAACAGAGCCATTCTATCCCAAGGAATCAGATCCATGTCTTTTGCCCCCCTCACCTTGGAGGAACCAAATAATTGAAGGTTGAGCTATCATATATATTTTAGCCTTAGTCTTCATGATACTTCCCTCTCTCTCTACTCAACAGGATTCTCCCCTGACTGCCAAAG
>DN83202_c0_g1_i1	len=285 path=[0:0-284]
CCGCTCTTGTCTCGCCCAATTCTTCAACTCCTGCAACTCGCTTTCACTTCCACATTCGACCCAGAGTTGCCCTTGTTTAGTTATGCAATTGACTGATATTGATTCCTTAAAACCTGCTTCTTATACATTCTAACTTCTTTGGCTAGATCATTTATTGATTTGGTTTGGTTTACCGTCACAGCGCGACTCGGATGCCGGATAAAAGAGACAAGGCACTATTAGATTTATCATTTTCCTTCTTCATCATATATACATATATATGTTTTCTTTTTTGTTTGATTTAGG
>DN83205_c0_g1_i1	len=229 path=[0:0-228]
ATGGATCTCACAATTTGCCTCCTAGCAACTTAAAAATTACTGGAGATTCAAGCTTTGGGATTTTCAAAGGAGCAAGAATAGGAATTCAACAGGATAGAAAACAATGGTTCAGGACAACTTAGCGTGCTTGGAATAAATGGATATTGGGGCTACCCCATACAATTCCAGAGGAATGTTCGGAAATGGAATATGAGACCCATTAACACCACCACAGCCAAAGTTAACTGGT
>DN83206_c0_g1_i1	len=311 path=[0:0-310]
ATGAAACTTTGATACACAATTCTATGCCTTGCCGGACTCGATACACTAGTACAATCAAATGTCAAAATATAGCAACACTTCAGTTGATGAATTGGTTGACGAAAAGGGCAAATCCCACCCAACAAAAACAGAAAAACACAGGACGACCAAGAAAAACAACAAGATTTCAACCTCAAAACTTTCTAGGACCCTTCACCAAGCTGAAACTTCAACTTTTCTGCAACTTCTTGGTATAAATTTCCATGCAGTCCTTATCTTATCGTATTCAATGCTGAGAAACAATCAAATATCAAAATATATCACAAAACATG
>DN83294_c0_g1_i1	len=283 path=[0:0-282]
CCCGTCTGCAAAATTTAGCCCCTAAAATGTTCCGTAGTAGATACATTTCTGATGTCAGGCCGAAGAAAAGTCTACACAGGGTGAGGCATATTTGTTCCTACAAACCACTGCAAAGAAACTTGTAAGAATGAATGGTACCTACTTTTACAAAAATCATGTTCCAAATTTCTTCCTATATTGTCACACGTATAGATCATGGTATAAGCTGAAGTTTCCTTGTCATTGTACTATGTGAAGTCATACAGACAAAAAACCAATGGCTACAAAATTTATCCTCAGGGGG
>DN83271_c0_g1_i1	len=330 path=[0:0-329]
GCAGTGTATTCTTTCCCTCTAACTACCAAAGTTACTCCTCATCCTTTGAAAGCTCCATAACTTTTGTCGTGTGCACTATTATCATTATTCTTTAACTTTTTGTCATGCATATTCCACCTTCCATGTGCAGATGTGTTCTCTGCCACCGCCACTGCTTACTCTGAGAAAAATCTCTCTGTTGTCCATGTGCACTAGCTTATCTTCTAACTTTAGGGCCACCTGGTAATGTGTCTTTAACTAAATGCATTTTATGCCATTCCTGGAGTTTGTTTTTTTGTTTTGTTTTTCCTTTGTTTTTCTTATTTTTCGTTTTTGTTCTTGTTGTTGGTT
>DN83261_c0_g1_i1	len=309 path=[0:0-308]
ATACCATAAACAATTTCAGAGGAATGTGGTCATGTTGAAAGAAAATCACAGTGGGTTTCAGAATCCCTATCTGTCACACCTGCCTGAAATATGTTGCAAGCACAAACTTGACACAACACCCCATAAAAAGTGCTTCACCTTGGAGAAAGGCCACTTGGGATGAAATCCAGCAAAGGAAAGACCCATTGAGGTCACCCACAACAAAATCTAGCAAAGGAGAGACCCATTGAGCTATTTGTAATTTTGGGAGCTCTATGAGGGGAATCTTCTTTTCTTCCACCTATGAATAGGCAAAGTATTGGAATATTA
[truncated: 67,474 more rows]
